# Supplementary material for: A Multiomic Approach to Understand How Pleurotus eryngii Transforms Non-Woody Lignocellulosic Material
Source: MDPI journal article supplement (doi:10.3390/jof7060426), 2021-05-28
Supplement: s1 [file s1]

**Table S2.** List of reference proteins for aromatic catabolism in *T. versicolor* and *C. subvermispora*, and corresponding hits in *P. eryngii*. The activity of some of the selected enzymes in *T. versicolor* and *C. subvermispora* was tested and validated in the presence of different substrates [1]. pHBA= 4-hydroxybenzoic acid, HQ= hydroquinone.

| Reference protein IDs | Enzyme activity, substrate utilized for validation                                                               | Hits in <i>P. eryngii</i> (protein ID) | % Identity and e-values of the hits |
|-----------------------|------------------------------------------------------------------------------------------------------------------|----------------------------------------|-------------------------------------|
| CERSUDRAFT_120062     | Oxidative decarboxylase, <u>validated</u> on pHBA and protocatechuate                                            | Pleery1_1521705<br>Pleery1_1510672     | 57.3%, 3.5e-178<br>52.7%, 2.2e-163  |
| CERSUDRAFT_90429      | Oxidative decarboxylase, <u>validated</u> on pHBA                                                                | Pleery1_1437817                        | 46.6%, 9.4e-134                     |
| TRAVEDRAFT_32834      | Oxidative decarboxylase, <u>validated</u> on protocatechuate                                                     | Pleery1_1437817                        | 44.4%, 8.0e-121                     |
| TRAVEDRAFT_58730      | Hydroxylase, <u>validated</u> on pHBA and HQ                                                                     | Pleery1_1471020                        | 60.9%, 0.0                          |
| CERSUDRAFT_82057      | Hydroxylase, <u>validated</u> on HQ                                                                              | Pleery1_1471020                        | 64.5%, 0.0                          |
| TRAVEDRAFT_28066      | Dioxygenase                                                                                                      | Pleery1_1440135                        | 64.6%, 5.5e-131                     |
| CERSUDRAFT_116134     | Dioxygenase                                                                                                      | Pleery1_1440135                        | 66.7%, 1.1e-151                     |
| TRAVEDRAFT_129211     | Cytochrome P450, not validated (putative conversion of pHBA to protocatechuate)                                  | Pleery1_1484875<br>Pleery1_1392807     | 65.8%, 0.0<br>40.3%, 2.1e-107       |
| CERSUDRAFT_116910     | Cytochrome P450, not validated (putative conversion of pHBA to protocatechuate)                                  | Pleery1_1484875<br>Pleery1_1392807     | 68.3%, 0.0<br>40.4%, 1.2e-112       |
| TRAVEDRAFT_26150      | Oxidoreductase, not validated (putative conversion of 4-hydroxymuconate semialdehyde to maleylacetate)           | Pleery1_1456897<br>Pleery1_1436180     | 65.9%, 0.0<br>55.8%, 0.0            |
| CERSUDRAFT_139148     | Oxidoreductase, not validated (putative conversion of 4-hydroxymuconate semialdehyde to maleylacetate)           | Pleery1_1456897<br>Pleery1_1436180     | 64.9%, 0.0<br>59.1%, 0.0            |
| TRAVEDRAFT_113954     | Maleylacetate reductase, not validated (putative conversion of maleylacetate to $\beta$ -ketoadipate)            | Pleery1_1550397                        | 68.0%, 0.0                          |
| TRAVEDRAFT_145135     | Oxoacid CoA transferase, not validated (putative conversion of $\beta$ -ketoadipate to $\beta$ -ketoadipyl CoA)  | Pleery1_1380612                        | 72.3%, 0.0                          |
| CERSUDRAFT_113511     | Oxoacid CoA transferase, not validated (putative conversion of $\beta$ -ketoadipate to $\beta$ -ketoadipyl CoA)  | Pleery1_1380612                        | 65.8%, 0.0                          |
| TRAVEDRAFT_116179     | CoA thiolase, not validated (putative conversion of $\beta$ -ketoadipyl CoA to succinate and acetyl-CoA)         | Pleery1_1443243                        | 82.1%, 0.0                          |
| CERSUDRAFT_81537      | CoA thiolase, not validated (putative conversion of $\beta$ -ketoadipyl CoA to succinate and acetyl-CoA)         | Pleery1_1491356<br>Pleery1_1438132     | 73.4%, 0.0<br>53.0%, 2.6e-140       |
| TRAVEDRAFT_61111      | Oxidoreductase (carboxylic acid reductase), not validated (putative conversion of pHBA to 4-hydroxybenzaldehyde) | Pleery1_1387871<br>Pleery1_1431563     | 37.6%, 0.0<br>37.9%, 0.0            |
| TRAVEDRAFT_155039     | Oxidoreductase (carboxylic acid reductase), not validated (putative conversion of pHBA to 4-hydroxybenzaldehyde) | Pleery1_1387871<br>Pleery1_1431563     | 37.8%, 0.0<br>37.8%, 0.0            |
| TRAVEDRAFT_170215     | Oxidoreductase (carboxylic acid reductase), not validated (putative conversion of pHBA to 4-hydroxybenzaldehyde) | Pleery1_1387871<br>Pleery1_1387810     | 38.2%, 0.0<br>36.4%, 0.0            |
| CERSUDRAFT_120461     | Aldehyde dehydrogenase, not validated (putative conversion of 4-hydroxybenzaldehyde to pHBA)                     | Pleery1_1456897<br>Pleery1_1436180     | 66.7%, 0.0<br>56.0%, 0.0            |
| CERSUDRAFT_139148     | Aldehyde dehydrogenase, not validated (putative conversion of 4-hydroxybenzaldehyde to pHBA)                     | Pleery1_1456897<br>Pleery1_1436180     | 64.9%, 0.0<br>59.1%, 0.0            |
| CERSUDRAFT_114803     | Alcohol dehydrogenase, not validated (putative conversion of 4-hydroxybenzaldehyde to 4-hydroxybenzyl alcohol)   | Pleery1_1446680<br>Pleery1_1409466     | 63.6%, 0.0<br>64.5%, 0.0            |

|                   |                                                                                                                |                                    |                                    |
|-------------------|----------------------------------------------------------------------------------------------------------------|------------------------------------|------------------------------------|
| CERSUDRAFT_116891 | Alcohol dehydrogenase, not validated (putative conversion of 4-hydroxybenzaldehyde to 4-hydroxybenzyl alcohol) | Pleery1_1446680<br>Pleery1_1512574 | 63.8%, 1.8e-109<br>65.9%, 1.5e-106 |
| CERSUDRAFT_116883 | Alcohol dehydrogenase, not validated (putative conversion of 4-hydroxybenzaldehyde to 4-hydroxybenzyl alcohol) | Pleery1_1446682<br>Pleery1_1409466 | 66.5%, 9.7e-177<br>61.7%, 1.1e-176 |
| TRAVEDRAFT_47268  | Alcohol dehydrogenase, not validated (putative conversion of 4-hydroxybenzaldehyde to 4-hydroxybenzyl alcohol) | Pleery1_1426281<br>Pleery1_1556441 | 62.2%, 1.3e-164<br>62.5%, 2.2e-148 |
| TRAVEDRAFT_170422 | Alcohol dehydrogenase, not validated (putative conversion of 4-hydroxybenzaldehyde to 4-hydroxybenzyl alcohol) | Pleery1_1505848<br>Pleery1_1420315 | 63.5%, 1.3e-151<br>63.1%, 2.7e-151 |
| TRAVEDRAFT_167157 | Alcohol oxidase, not validated (putative conversion of 4-hydroxybenzyl alcohol to 4-hydroxybenzaldehyde)       | Pleery1_319386<br>Pleery1_1435398  | 50.8%, 0.0<br>48.2%, 0.0           |
| TRAVEDRAFT_157221 | Aldehyde oxidase, not validated (putative conversion of 4-hydroxybenzaldehyde to pHBA)                         | Pleery1_1450186                    | 42.2%, 1.0e-132                    |
| TRAVEDRAFT_175111 | Aldehyde oxidase, not validated (putative conversion of 4-hydroxybenzaldehyde to pHBA)                         | Pleery1_1429945<br>Pleery1_1405413 | 42.9%, 5.9e-124<br>39.0%, 5.4e-117 |
| CERSUDRAFT_152302 | Methyltransferase, not validated (putative reversible conversion of 4-hydroxybenzoate to 4-methoxybenzoate)    | Pleery1_1507445                    | 43.0%, 1.08e-108                   |
| CERSUDRAFT_87325  | Methyltransferase, not validated (putative reversible conversion of 4-hydroxybenzoate to 4-methoxybenzoate)    | Pleery1_1507445<br>Pleery1_1428432 | 46.4%, 4.3e-120<br>42.2%, 1.9e-118 |
| CERSUDRAFT_112014 | Methyltransferase, not validated (putative reversible conversion of 4-hydroxybenzoate to 4-methoxybenzoate)    | Pleery1_1507445<br>Pleery1_1428432 | 42.9%, 1.4e-107<br>40.0%, 2.0e-103 |
| CERSUDRAFT_114284 | Methyltransferase, not validated (putative reversible conversion of 4-hydroxybenzoate to 4-methoxybenzoate)    | Pleery1_1507445                    | 42.6%, 1.7e-104                    |

1. Del Cerro, C.; Erickson, E.; Dong, T.; Wong, A.R.; Eder, E.K.; Purvine, S.O.; Mitchell, H.D.; Weitz, K.K.; Markillie, L.M.; Burnet, M.C.; et al. Intracellular pathways for lignin catabolism in white-rot fungi. *Proc. Natl. Acad. Sci. U. S A* **2021**, *118*.
