# Supplementary material for: A Multiomic Approach to Understand How Pleurotus eryngii Transforms Non-Woody Lignocellulosic Material
Source: MDPI journal article supplement (doi:10.3390/jof7060426), 2021-05-28
Supplement: s1 [file s1]

Table S9

| JGI-ID  |                    | RNA seq (log2) |         |       |      |      |             |         |       |         |      |
|---------|--------------------|----------------|---------|-------|------|------|-------------|---------|-------|---------|------|
|         |                    | Day 6          |         |       |      |      | Day 14      |         |       |         |      |
|         |                    | Wheat straw    | Control | FC    | FDR  | PSMs | Wheat straw | Control | FC    | FDR     | PSMs |
| 1444721 |                    | 11.75          | 12.34   | -0.59 | 1    | 0    | 11.20       | 12.66   | -1.46 | 1       | 0    |
| 1473830 |                    | 10.57          | 11.85   | -1.28 | 1    | 0    | 9.24        | 11.91   | -2.67 | 1       | 0    |
| 1068526 |                    | 10.30          | 12.34   | -2.04 | 1    | 0    | 10.09       | 12.18   | -2.08 | 1       | 0    |
| 1433269 |                    | 8.94           | 7.76    | 1.18  | 1    | 0    | 8.72        | 8.46    | 0.27  | 1       | 0    |
| 416035  |                    | 8.83           | 8.27    | 0.56  | 1    | 0    | 8.73        | 8.22    | 0.51  | 1       | 0    |
| 1447792 |                    | 7.47           | 7.37    | 0.10  | 1    | 0    | 7.98        | 7.90    | 0.08  | 1       | 0    |
| 1508330 |                    | 7.41           | 6.85    | 0.56  | 1    | 0    | 7.68        | 7.01    | 0.67  | 1       | 0    |
| 1399739 |                    | 7.26           | 5.98    | 1.28  | 1    | 0    | 7.14        | 6.57    | 0.56  | 1       | 0    |
| 809199  | Fungal hydrophobin | 6.94           | 7.36    | -0.41 | 1    | 0    | 7.60        | 8.22    | -0.62 | 1       | 0    |
| 1384790 |                    | 6.80           | 5.48    | 1.32  | 1    | 0    | 6.91        | 5.84    | 1.08  | 1       | 0    |
| 833829  |                    | 6.42           | 4.88    | 1.54  | 1    | 0    | 6.96        | 5.28    | 1.68  | 1       | 0    |
| 1509832 |                    | 6.09           | 6.40    | -0.32 | 1    | 0    | 6.36        | 6.49    | -0.13 | 1       | 0    |
| 1398020 |                    | 5.83           | 4.98    | 0.85  | 1    | 0    | 6.25        | 4.87    | 1.38  | 1       | 0    |
| 1449904 |                    | 5.75           | 3.95    | 1.8   | 1    | 0    | 4.56        | 4.2     | 0.36  | 1       | 0    |
| 1400791 |                    | 5.6            | 7.73    | -2.13 | 0.39 | 0    | 5.51        | 8.89    | -3.38 | 1.5E-11 | 0    |
| 1587123 |                    | 5.33           | 4.58    | 0.76  | 1    | 0    | 5.5         | 4.6     | 0.89  | 1       | 0    |
| 1445631 |                    | 4.35           | 3.68    | 0.67  | 1    | 0    | 4.6         | 3.95    | 0.66  | 1       | 0    |

**Table S9.** Hydrophobins (JGI identification numbers, JGI-IDs) encoded in the genome of *P. eryngii*. They were identified in the transcriptome of *P. eryngii* grown on wheat straw and in glucose ammonium medium (control) after 6 and 14 days of culture. The table includes log2 normalized RNA-seq read counts (averaged from the replicates at all growth points) and shows fold-change differences (FC) in gene expression between substrates (wheat straw *vs* glucose-ammonium) (statistical significance, Wald test FDR < 0.05). Hydrophobins did not appeared in the exoproteome (PSM values =0).
