# Supplementary material for: A Multiomic Approach to Understand How Pleurotus eryngii Transforms Non-Woody Lignocellulosic Material
Source: J Fungi (Basel). 2021 May 28;7(6):426. doi: 10.3390/jof7060426 (PMC8227661; doi:10.3390/jof7060426)
Supplement: Supplementary file 1 [file jof-07-00426-s001.zip]

Archive with 10 entries (10 files):
- Supplementary_Material/Suppl_Figs_S1-S6.pdf
- Supplementary_Material/Table S1.xlsx
- Supplementary_Material/Table S2.pdf
- Supplementary_Material/Table S3.xlsx
- Supplementary_Material/Table S4.xlsx
- Supplementary_Material/Table S5.pdf
- Supplementary_Material/Table S6.xlsx
- Supplementary_Material/Table S7.xlsx
- Supplementary_Material/Table S8.xlsx
- Supplementary_Material/Table S9.pdf
