# Supplementary material for: A Multiomic Approach to Understand How Pleurotus eryngii Transforms Non-Woody Lignocellulosic Material
Source: J Fungi (Basel). 2021 May 28;7(6):426. doi: 10.3390/jof7060426 (PMC8227661; doi:10.3390/jof7060426)
Supplement: Supplementary file 1 [file jof-07-00426-s001.zip › Supplementary_Material/Table S3.xlsx]

## Sheet: Table S3
Table S3. Repertoire of glycoside hydrolase (GH), polysaccharide lyase (PL), carbohydrate esterase (CE) and glycosyl transferase (GT) CAZymes; oxidoreductases classified as auxiliary activities (AA) in CAZy database (www.cazy.org); unspecific peroxygenases (UPO); dye-decolorizing peroxidases (DyP); carbohydrate binding modules (CBM); and hydrophobins in the P. eryngii genome. Protein reference nu…
	GH1	GH2	GH3	GH5												GH6	GH7	GH9	GH10	GH11	GH12	GH13								GH15	GH16	GH17	GH18	GH20	GH23	GH24	GH25	GH26	GH27	GH28	GH29	GH30				GH31	GH32	GH33	GH35
(sub)family	GH1	GH2	GH3	GH5_nosub	GH5_5	GH5_7	GH5_9	GH5_11	GH5_12	GH5_15	GH5_22	GH5_30	GH5_31	GH5_50	GH5_51	GH6	GH7	GH9	GH10	GH11	GH12	GH13_nosub	GH13_1	GH13_5	GH13_8	GH13_22	GH13_25	GH13_32	GH13_40	GH15	GH16	GH17	GH18	GH20	GH23	GH24	GH25	GH26	GH27	GH28	GH29	GH30_nosub	GH30_3	GH30_5	GH30_7	GH31	GH32	GH33	GH35
Plant (PCWDE) or fungal (FCWDE) cell wall degrading enzymes	PCWDE	PCWDE	PCWDE		PCWDE	PCWDE	FCWDE			FCWDE	PCWDE		FCWDE			PCWDE	PCWDE	PCWDE, FCWDE	PCWDE	PCWDE	PCWDE										FCWDE	FCWDE	FCWDE	FCWDE				PCWDE	PCWDE, FCWDE	PCWDE	PCWDE		FCWDE	FCWDE	PCWDE	PCWDE			PCWDE
Substrate	Cellulose, Hemicellulose	Hemicellulose	Cellulose, Hemicellulose		Cellulose	Hemicellulose					Cellulose, Hemicellulose					Cellulose	Cellulose	Cellulose	Hemicellulose	Hemicellulose	Cellulose, Hemicellulose																	Hemicellulose	Hemicellulose	Pectin	Hemicellulose				Hemicellulose	Hemicellulose			Hemicellulose, Pectin
Pleurotus eryngii ATCC 90797 v1.0 (Pleer)	3	4	13	0	4	4	5	0	2	1	2	1	0	1	0	3	17	1	4	2	2	0	2	1	1	1	1	3	1	3	23	3	14	2	1	3	2	0	8	8	0	1	2	0	0	5	1	0	4
JGI-ID *The JGI-IDs of the CBMs marked with an asterisk correspond to two CBMs linked in tandem, and are counted as two proteins	1486682	164456	70270		682179	481723	1403196		592183	1590136	1391373	1461766		1381013		201471	109625	1385838	1435402	1397134	694900		1223715	1410094	1452977	940544	1442036	1452321	1452711	724074	111733	1380125	646177	1386623	1485835	317566	1381374		652815	451035		1590569	1398717			587956	1454473		1450050
	1508786	1386559	1296640		1480677	481840	1445833		1444949		1447403					1420400	171999		1486170	1483890	1508358		1511403					1452322		1446083	323762	1382957	878658	1526800		1438238	1440045		1381480	862308			1584339			1418496			1512741
	1578257	1481066	1398709		1491725	1441291	1479769									1427424	919811		1529314									1531390		1510188	1356328	1481007	1386702			1512110			1394642	1379363						1469311			1590086
		1484433	1399890		1587686	1491814	1500459										1167269		1484806												1381667		1395490						1427092	1380264						1483055			1593830
			1425606				1568598										1428075														1383841		1443746						1440033	1404168						1501461
			1437496														1434241														1386278		1443749						1441869	1437617
			1442989														1441893														1387326		1450325						1441870	1523284
			1451513														1441914														1401791		1479547						1487086	1574975
			1452626														1480027														1407180		1495954
			1480295														1480253														1437566		1504866
			1482414														1481328														1444107		1510688
			1512579														1484295														1445149		1510851
			1561246														1485052														1449041		1588524
																	1489538														1449875		1588525
																	1509942														1455788
																	1509943														1458977
																	1572947														1462204
																															1464881
																															1479193
																															1500253
																															1503146
																															1503678
																															1590853
[truncated: 160 more columns]
