# Supplementary material for: A Multiomic Approach to Understand How Pleurotus eryngii Transforms Non-Woody Lignocellulosic Material
Source: J Fungi (Basel). 2021 May 28;7(6):426. doi: 10.3390/jof7060426 (PMC8227661; doi:10.3390/jof7060426)
Supplement: Supplementary file 1 [file jof-07-00426-s001.zip › Supplementary_Material/Table S4.xlsx]

## Sheet: BP
Table S4. Gene Ontology enrichment analysis for up-regulated genes on wheat straw vs glucose-ammonium medium. Identification, transcriptomic regulation, and functions of proteins that are part of the enriched GO terms classified according to the Biological Process in which they are involved (BP, this sheet), Cellular Component where they are localized (CC, second sheet of this workbook) and Molec…
GO.ID	Term	protein ID	Fold Change Day 6	FDR day 6	Fold Change Day 14	FDR day 14	CAZymes	PCWDE/FCWDE	Substrate	KOG functions
GO:0005975	carbohydrate metabolic process	70270	2.46	0.00236628	1.22	1	GH3	PCWDE	Cellulose, Hemicellulose
		106407	2.74	1.69e-09	3.42	2.22e-24	CE1-CBM1	PCWDE	Hemicellulose	Collagens (type IV and type XIII), and related proteins
		109625	3.91	2.07e-25	1.76	1	GH7-CBM1	PCWDE	Cellulose
		201471	2.81	1.37e-07	2.34	0.168643	GH6	PCWDE	Cellulose
		451035	5.08	2.66e-88	5.27	1.09e-81	GH28	PCWDE	Pectin
		481840	4.52	1.28e-24	3.95	6.14e-20	CBM1-GH5_7	PCWDE	Hemicellulose
		682179	7.69	1.54e-104	6.8	6.91e-98	CBM1-GH5_5	PCWDE	Cellulose
		919811	5.14	9.42e-59	5.81	5.91e-75	GH7	PCWDE	Cellulose
		1167269	5.09	2.44e-58	0.7	1	GH7-CBM1	PCWDE	Cellulose
		1379363	4.67	2.28e-65	4.97	2.31e-69	GH28	PCWDE	Pectin
		1381480	1.65	1	3.01	2.9e-05	GH27	PCWDE, FCWDE	Hemicellulose	Alpha-D-galactosidase (melibiase)
		1382656	2.03	1	2.7	8.29e-05	GH79
		1390320	2.13	1	2.8	7.95e-08	GH43	PCWDE	Hemicellulose
		1391373	1.69	1	2.82	6.82e-11	GH5_22	PCWDE	Cellulose, Hemicellulose
		1394642	3.02	8.52e-19	2.89	4.42e-12	GH27-CBM35	PCWDE, FCWDE	Hemicellulose	Alpha-D-galactosidase (melibiase)
		1397134	5.81	3.79e-85	4.98	3.31e-54	GH11	PCWDE	Hemicellulose
		1397385	5.61	4.5e-95	5.29	1.53e-75	CBM1-CE16	PCWDE	Hemicellulose
		1398709	2.42	0.0608563	4.13	2.53e-29	GH3	PCWDE	Cellulose, Hemicellulose
		1399890	3.6	4.13e-24	3.07	1.68e-10	GH3	PCWDE	Cellulose, Hemicellulose
		1404168	2.76	2.51e-07	2.74	9.69e-06	GH28	PCWDE	Pectin
		1420400	3.45	3.33e-27	3.31	1.39e-18	CBM1-GH6	PCWDE	Cellulose
		1427092	2.35	0.0571535	2.47	0.0424896	GH27	PCWDE, FCWDE	Hemicellulose	Alpha-D-galactosidase (melibiase)
		1427424	7.59	2.53e-175	6.7	7.4e-133	CBM1-GH6	PCWDE	Cellulose
		1435402	3.33	1.27e-17	2.68	1.47e-05	CBM1-GH10	PCWDE	Hemicellulose
		1436167	1.91	1	4.49	2.96e-41	AA9-CBM1	PCWDE	Cellulose
		1437617	3.01	4.38e-15	2.67	4.86e-06	GH28	PCWDE	Pectin
		1441855	3.12	2.7e-13	3.49	2.4e-18	GH43	PCWDE	Hemicellulose
		1442989	2.47	1.11e-05	3.04	2.89e-19	GH3	PCWDE	Cellulose, Hemicellulose
		1443658	3.72	3.33e-25	3.47	5.34e-20	AA9-CBM1	PCWDE	Cellulose
		1443746	4.56	8.76e-48	3.48	3.57e-16	GH18	FCWDE		Chitinase
		1444580	3.79	4.16e-18	4.09	9.97e-20	PL4_1	PCWDE	Pectin	Chitinase
		1445552	2.46	0.000491628	1.95	1	GH43	PCWDE	Hemicellulose
		1450050	2.63	6.59e-06	2.35	0.106851	GH35	PCWDE	Hemicellulose, Pectin	Beta-galactosidase
		1454473	2.87	2.46e-05	2.26	0.561689	GH32			Beta-fructofuranosidase (invertase)
		1466792	2.5	0.00674505	2.85	4.3e-05
		1476771	2.97	1.77e-09	2.11	1	PL8_4			beta-1,6-N-acetylglucosaminyltransferase, contains WSC domain | beta-1,6-N-acetylglucosaminyltransferase, contains WSC domain
		1480253	4.2	1.69e-20	3.6	1.88e-14	GH7	PCWDE	Cellulose
		1483890	3.74	1.71e-29	3.66	9.73e-23	GH11-CBM1	PCWDE	Hemicellulose
		1484073	3.25	5.59e-15	3.05	3.28e-10				Predicted mutarotase
		1484295	7.03	1.39e-204	6.86	9.23e-173	GH7	PCWDE	Cellulose
		1484806	2.27	0.100855	2.43	0.0352735	GH10	PCWDE	Hemicellulose
		1485211	4.45	3.36e-52	3.98	1.1e-30	PL4_1	PCWDE	Pectin
		1486682	3.43	7.87e-31	3.48	9.11e-28	GH1	PCWDE	Cellulose	Beta-glucosidase, lactase phlorizinhydrolase, and related proteins
		1487086	3.53	5.91e-05	5.25	3.33e-17	GH27	PCWDE, FCWDE	Hemicellulose	Alpha-D-galactosidase (melibiase)
		1491725	4.06	1.96e-31	4.56	4.82e-41	CBM1-GH5_5	PCWDE	Cellulose
		1491814	7.44	8.42e-104	7.77	2.54e-111	CBM1-GH5_7	PCWDE	Hemicellulose
		1504866	4.2	1.49e-12	4.32	2.52e-10	GH18	FCWDE		Chitinase
		1506651	4.41	3.35e-42	4.24	7.01e-33	CBM1-PL3	PCWDE	Pectin
		1506660	4.38	5.43e-32	3.66	3.7e-14	CBM1-PL3	PCWDE	Pectin	Defense-related protein containing SCP domain
		1507772	6.5	4.58e-32	6.36	6.88e-50	CBM1	PCWDE	Cellulose
		1512579	4.1	5.7e-54	3.31	1.07e-22	GH3	PCWDE	Cellulose, Hemicellulose
		1512741	4.63	1.51e-69	4.01	8.09e-38	GH35	PCWDE	Hemicellulose, Pectin	Beta-galactosidase
		1526286	6.29	9.05e-120	6.06	4.42e-124	GH131-CBM1	PCWDE	Cellulose, Hemicellulose
		1529314	2.35	0.0164958	1.74	1	CBM1-GH10	PCWDE	Hemicellulose
		1531390	7.89	1.22e-21	8.36	2.6e-116	GH13_32-CBM20			Alpha-amylase
		1535828	4.9	8.73e-84	4.86	1.79e-68	GH43-CBM35	PCWDE	Hemicellulose
		1578257	2.44	0.000506466	2.93	8.59e-12	GH1	PCWDE	Cellulose	Beta-glucosidase, lactase phlorizinhydrolase, and related proteins
		1590086	2.98	1.05e-16	2.6	3.99e-06	GH35	PCWDE	Hemicellulose, Pectin	Beta-galactosidase
		1593200	5.63	2.06e-27	5.62	4.8e-15	CBM1-CE15	PCWDE	Hemicellulose
		1593878	3.63	7.13e-24	3.96	2.84e-29	GH45-CBM1	PCWDE	Cellulose
GO:0008643	carbohydrate transport	230583	3.12	3.37e-11	3.91	7.23e-24				Predicted transporter (major facilitator superfamily)
		1095673	1.67	1	3.23	4.14e-13				Predicted transporter (major facilitator superfamily)
		1411905	2.25	0.0259991	2.47	5.32e-05				Predicted transporter (major facilitator superfamily)
		1444006	4.1	8.28e-10	3.84	3.09e-05				Predicted transporter (major facilitator superfamily)
		1446359	4.52	1.44e-92	2.83	6.82e-10				Predicted transporter (major facilitator superfamily)
		1450295	2.05	1	3.55	2.46e-32				Predicted transporter (major facilitator superfamily)
		1452019	2.63	2.47e-05	3.35	5.4e-16				Predicted transporter (major facilitator superfamily)
		1481632	1.55	1	2.57	0.000629032				Predicted transporter (major facilitator superfamily)
		1482066	1.78	1	2.78	3.1e-08				Predicted transporter (major facilitator superfamily)

## Sheet: CC
Table S4. Gene Ontology enrichment analysis for up-regulated genes on wheat straw vs glucose-ammonium medium. Identification, transcriptomic regulation, and functions of proteins that are part of the enriched GO terms classified according to the Biological Process in which they are involved (BP, first sheet of this workbook), Cellular Component where they are localized (CC, this sheet) and Molecu…
GO.ID	Term	protein ID	Fold Change Day 6	FDR day 6	Fold Change Day 14	FDR day 14	CAZymes	PCWDE/FCWDE	Substrate	KOG functions
GO:0005576	extracellular region	106407	2.74	1.69e-09	3.42	2.22e-24	CE1-CBM1	PCWDE	Hemicellulose	Collagens (type IV and type XIII), and related proteins
		109625	3.91	2.07e-25	1.76	1	GH7-CBM1	PCWDE	Cellulose
		481840	4.52	1.28e-24	3.95	6.14e-20	CBM1-GH5_7	PCWDE	Hemicellulose
		682179	7.69	1.54e-104	6.8	6.91e-98	CBM1-GH5_5	PCWDE	Cellulose
		690427	2.96	3.86e-08	3.59	4.61e-18	PL3	PCWDE	Pectin
		1167269	5.09	2.44e-58	0.7	1	GH7-CBM1	PCWDE	Cellulose
		1397134	5.81	3.79e-85	4.98	3.31e-54	GH11	PCWDE	Hemicellulose
		1397385	5.61	4.5e-95	5.29	1.53e-75	CBM1-CE16	PCWDE	Hemicellulose
		1420400	3.45	3.33e-27	3.31	1.39e-18	CBM1-GH6	PCWDE	Cellulose
		1427424	7.59	2.53e-175	6.7	7.4e-133	CBM1-GH6	PCWDE	Cellulose
		1435402	3.33	1.27e-17	2.68	1.47e-05	CBM1-GH10	PCWDE	Hemicellulose
		1436167	1.91	1	4.49	2.96e-41	AA9-CBM1	PCWDE	Cellulose
		1438238	-0.43	1	2.97	0.000142987	GH24
		1443658	3.72	3.33e-25	3.47	5.34e-20	AA9-CBM1	PCWDE	Cellulose
		1476771	2.97	1.77e-09	2.11	1	PL8_4			beta-1,6-N-acetylglucosaminyltransferase, contains WSC domain | beta-1,6-N-acetylglucosaminyltransferase, contains WSC domain
		1483890	3.74	1.71e-29	3.66	9.73e-23	GH11-CBM1	PCWDE	Hemicellulose
		1491725	4.06	1.96e-31	4.56	4.82e-41	CBM1-GH5_5	PCWDE	Cellulose
		1491814	7.44	8.42e-104	7.77	2.54e-111	CBM1-GH5_7	PCWDE	Hemicellulose
		1506651	4.41	3.35e-42	4.24	7.01e-33	CBM1-PL3	PCWDE	Pectin
		1506660	4.38	5.43e-32	3.66	3.7e-14	CBM1-PL3	PCWDE	Pectin	Defense-related protein containing SCP domain
		1507772	6.5	4.58e-32	6.36	6.88e-50	CBM1	PCWDE	Cellulose
		1526286	6.29	9.05e-120	6.06	4.42e-124	GH131-CBM1	PCWDE	Cellulose, Hemicellulose
		1529314	2.35	0.0164958	1.74	1	CBM1-GH10	PCWDE	Hemicellulose
		1593200	5.63	2.06e-27	5.62	4.8e-15	CBM1-CE15	PCWDE	Hemicellulose
		1593878	3.63	7.13e-24	3.96	2.84e-29	GH45-CBM1	PCWDE	Cellulose
GO:0009341	beta-galactosidase complex	1450050	2.63	6.59e-06	2.35	0.106851	GH35	PCWDE	Hemicellulose, Pectin	Beta-galactosidase
		1512741	4.63	1.51e-69	4.01	8.09e-38	GH35	PCWDE	Hemicellulose, Pectin	Beta-galactosidase
		1590086	2.98	1.05e-16	2.6	3.99e-06	GH35	PCWDE	Hemicellulose, Pectin	Beta-galactosidase

## Sheet: MF
Table S4. Gene Ontology enrichment analysis for up-regulated genes on wheat straw vs glucose-ammonium medium. Identification, transcriptomic regulation, and functions of proteins that are part of the enriched GO terms classified according to the Biological Process in which they are involved (BP, first sheet of this workbook), Cellular Component where they are localized (CC, second sheet of this w…
GO.ID	Term	proteinid	Fold Change Day 6	FDR day 6	Fold Change Day 14	FDR day 14	CAZymes	PCWDE/FCWDE	Substrate	KOG functions
GO:0000721	(R,R)-butanediol dehydrogenase activity	1453339	3.14	2.87e-16	1.94	1				Proteins containing the FAD binding domain
		1543569	3.98	6.36e-47	2.37	0.0162145				Sorbitol dehydrogenase
		1588227	5.16	1.26e-51	5.06	3.71e-47				Sorbitol dehydrogenase
GO:0004025	alcohol dehydrogenase activity, iron-dependent	1420315	0.99	1	2.52	0.000215822				Zinc-binding oxidoreductase | Zinc-binding oxidoreductase
		1452003	2.22	0.645318	4.22	8.25e-23				Zinc-binding oxidoreductase | Zinc-binding oxidoreductase
		1452858	0.17	1	3.91	2.05e-31				Sorbitol dehydrogenase
		1528306	1.53	1	3.62	3.76e-32				Zinc-binding oxidoreductase | Zinc-binding oxidoreductase
GO:0004553	hydrolase activity, hydrolyzing O-glycosyl compounds	70270	2.46	0.00236628	1.22	1	GH3	PCWDE	Cellulose, Hemicellulose
		106407	2.74	1.69e-09	3.42	2.22e-24	CE1-CBM1	PCWDE	Hemicellulose	Collagens (type IV and type XIII), and related proteins
		109625	3.91	2.07e-25	1.76	1	GH7-CBM1	PCWDE	Cellulose
		201471	2.81	1.37e-07	2.34	0.168643	GH6	PCWDE	Cellulose
		481840	4.52	1.28e-24	3.95	6.14e-20	CBM1-GH5_7	PCWDE	Hemicellulose
		682179	7.69	1.54e-104	6.8	6.91e-98	CBM1-GH5_5	PCWDE	Cellulose
		919811	5.14	9.42e-59	5.81	5.91e-75	GH7	PCWDE	Cellulose
		1167269	5.09	2.44e-58	0.7	1	GH7-CBM1	PCWDE	Cellulose
		1381480	1.65	1	3.01	2.9e-05	GH27	PCWDE, FCWDE	Hemicellulose	Alpha-D-galactosidase (melibiase)
		1382656	2.03	1	2.7	8.29e-05	GH79
		1390320	2.13	1	2.8	7.95e-08	GH43	PCWDE	Hemicellulose
		1391373	1.69	1	2.82	6.82e-11	GH5_22	PCWDE	Cellulose, Hemicellulose
		1394642	3.02	8.52e-19	2.89	4.42e-12	GH27-CBM35	PCWDE, FCWDE	Hemicellulose	Alpha-D-galactosidase (melibiase)
		1397134	5.81	3.79e-85	4.98	3.31e-54	GH11	PCWDE	Hemicellulose
		1397385	5.61	4.5e-95	5.29	1.53e-75	CBM1-CE16	PCWDE	Hemicellulose
		1398709	2.42	0.0608563	4.13	2.53e-29	GH3	PCWDE	Cellulose, Hemicellulose
		1399890	3.6	4.13e-24	3.07	1.68e-10	GH3	PCWDE	Cellulose, Hemicellulose
		1420400	3.45	3.33e-27	3.31	1.39e-18	CBM1-GH6	PCWDE	Cellulose
		1427092	2.35	0.0571535	2.47	0.0424896	GH27	PCWDE, FCWDE	Hemicellulose	Alpha-D-galactosidase (melibiase)
		1427424	7.59	2.53e-175	6.7	7.4e-133	CBM1-GH6	PCWDE	Cellulose
		1435402	3.33	1.27e-17	2.68	1.47e-05	CBM1-GH10	PCWDE	Hemicellulose
		1436167	1.91	1	4.49	2.96e-41	AA9-CBM1	PCWDE	Cellulose
		1441855	3.12	2.7e-13	3.49	2.4e-18	GH43	PCWDE	Hemicellulose
		1442989	2.47	1.11e-05	3.04	2.89e-19	GH3	PCWDE	Cellulose, Hemicellulose
		1443658	3.72	3.33e-25	3.47	5.34e-20	AA9-CBM1	PCWDE	Cellulose
		1443746	4.56	8.76e-48	3.48	3.57e-16	GH18	FCWDE		Chitinase
		1445552	2.46	0.000491628	1.95	1	GH43	PCWDE	Hemicellulose
		1454473	2.87	2.46e-05	2.26	0.561689	GH32			Beta-fructofuranosidase (invertase)
		1480253	4.2	1.69e-20	3.6	1.88e-14	GH7	PCWDE	Cellulose
		1483890	3.74	1.71e-29	3.66	9.73e-23	GH11-CBM1	PCWDE	Hemicellulose
		1484295	7.03	1.39e-204	6.86	9.23e-173	GH7	PCWDE	Cellulose
		1484806	2.27	0.100855	2.43	0.0352735	GH10	PCWDE	Hemicellulose
		1486682	3.43	7.87e-31	3.48	9.11e-28	GH1	PCWDE	Cellulose	Beta-glucosidase, lactase phlorizinhydrolase, and related proteins
		1487086	3.53	5.91e-05	5.25	3.33e-17	GH27	PCWDE, FCWDE	Hemicellulose	Alpha-D-galactosidase (melibiase)
		1491725	4.06	1.96e-31	4.56	4.82e-41	CBM1-GH5_5	PCWDE	Cellulose
		1491814	7.44	8.42e-104	7.77	2.54e-111	CBM1-GH5_7	PCWDE	Hemicellulose
		1504866	4.2	1.49e-12	4.32	2.52e-10	GH18	FCWDE		Chitinase
		1506651	4.41	3.35e-42	4.24	7.01e-33	CBM1-PL3	PCWDE	Pectin
		1506660	4.38	5.43e-32	3.66	3.7e-14	CBM1-PL3	PCWDE	Pectin	Defense-related protein containing SCP domain
		1507772	6.5	4.58e-32	6.36	6.88e-50	CBM1	PCWDE	Cellulose
		1512579	4.1	5.7e-54	3.31	1.07e-22	GH3	PCWDE	Cellulose, Hemicellulose
		1526286	6.29	9.05e-120	6.06	4.42e-124	GH131-CBM1	PCWDE	Cellulose, Hemicellulose
		1529314	2.35	0.0164958	1.74	1	CBM1-GH10	PCWDE	Hemicellulose
		1535828	4.9	8.73e-84	4.86	1.79e-68	GH43-CBM35	PCWDE	Hemicellulose
		1578257	2.44	0.000506466	2.93	8.59e-12	GH1	PCWDE	Cellulose	Beta-glucosidase, lactase phlorizinhydrolase, and related proteins
		1593200	5.63	2.06e-27	5.62	4.8e-15	CBM1-CE15	PCWDE	Hemicellulose
		1593878	3.63	7.13e-24	3.96	2.84e-29	GH45-CBM1	PCWDE	Cellulose
GO:0005351	carbohydrate:proton symporter activity	230583	3.12	3.37e-11	3.91	7.23e-24				Predicted transporter (major facilitator superfamily)
		1095673	1.67	1	3.23	4.14e-13				Predicted transporter (major facilitator superfamily)
		1411905	2.25	0.0259991	2.47	5.32e-05				Predicted transporter (major facilitator superfamily)
		1444006	4.1	8.28e-10	3.84	3.09e-05				Predicted transporter (major facilitator superfamily)
		1446359	4.52	1.44e-92	2.83	6.82e-10				Predicted transporter (major facilitator superfamily)
		1450295	2.05	1	3.55	2.46e-32				Predicted transporter (major facilitator superfamily)
		1452019	2.63	2.47e-05	3.35	5.4e-16				Predicted transporter (major facilitator superfamily)
		1481632	1.55	1	2.57	0.000629032				Predicted transporter (major facilitator superfamily)
		1482066	1.78	1	2.78	3.1e-08				Predicted transporter (major facilitator superfamily)
		1549339	5.12	2.28e-11	4.36	3.68e-06				Isocitrate lyase
GO:0008733	L-arabinose isomerase activity	230583	3.12	3.37e-11	3.91	7.23e-24				Predicted transporter (major facilitator superfamily)
		1095673	1.67	1	3.23	4.14e-13				Predicted transporter (major facilitator superfamily)
		1411905	2.25	0.0259991	2.47	5.32e-05				Predicted transporter (major facilitator superfamily)
		1441231	1.75	1	3.03	1.58e-14				Predicted transporter (major facilitator superfamily)
		1444006	4.1	8.28e-10	3.84	3.09e-05				Predicted transporter (major facilitator superfamily)
		1446359	4.52	1.44e-92	2.83	6.82e-10				Predicted transporter (major facilitator superfamily)
		1450295	2.05	1	3.55	2.46e-32				Predicted transporter (major facilitator superfamily)
		1452019	2.63	2.47e-05	3.35	5.4e-16				Predicted transporter (major facilitator superfamily)
		1481632	1.55	1	2.57	0.000629032				Predicted transporter (major facilitator superfamily)
		1482066	1.78	1	2.78	3.1e-08				Predicted transporter (major facilitator superfamily)
GO:0015171	amino acid transmembrane transporter activity	1426990	1.96	1	3.09	3.09e-20				Amino acid transporters
		1444252	4.08	1.65e-31	3.22	1e-14				Amino acid transporters
		1445566	3.57	1.26e-18	2.74	0.00201503				Amino acid transporters
		1499216	2.59	9.08e-05	1.99	1				Amino acid transporters
		1507247	1.72	1	4.16	2.66e-63				Amino acid transporters
		1512453	3.03	4.18e-22	3.03	4.1e-18				Amino acid transporters
GO:0016688	L-ascorbate peroxidase activity	1607098	2.41	0.00617329	-1.62	1	AA2, VP1	PCWDE	Lignin
		1607100	3.16	2.84e-08	4.56	6.13e-25	AA2, MnP5-short	PCWDE	Lignin
		1607102	3.94	5.48e-25	4.95	7.43e-43	AA2, MnP3-short	PCWDE	Lignin
GO:0020037	heme binding	409584	4.92	7.86e-05	4.14	0.460395				Cytochrome P450 CYP2 subfamily
		804608	3.61	4.55e-30	3.24	3.22e-16				Cytochrome P450 CYP2 subfamily
		833069	3.85	3.79e-33	4.37	1.24e-58				Cytochrome P450 CYP2 subfamily
		1253041	2.78	3.41e-11	2.13	1				Cytochrome P450 CYP2 subfamily
		1401641	1.79	1	3.37	1.33e-12				Cytochrome P450 CYP2 subfamily
		1402345	3.67	0.0165401	1.73	1				Cytochrome P450 CYP2 subfamily
		1418139	0.48	1	5.67	1.05e-96				Catalase
		1443624	2.75	5.99e-10	3.25	3.76e-20				Cytochrome P450 CYP4/CYP19/CYP26 subfamilies | Cytochrome P450 CYP4/CYP19/CYP26 subfamilies
		1443874	2.52	0.000334825	0.5	1				Cytochrome P450 CYP4/CYP19/CYP26 subfamilies | Cytochrome P450 CYP4/CYP19/CYP26 subfamilies
		1450244	1.17	1	4.84	4.43e-44				Cytochrome P450 CYP4/CYP19/CYP26 subfamilies | Cytochrome P450 CYP4/CYP19/CYP26 subfamilies
		1457807	3.18	7.07e-12	1.41	1				Cytochrome P450 CYP4/CYP19/CYP26 subfamilies | Cytochrome P450 CYP4/CYP19/CYP26 subfamilies
		1458998	2.2	1	2.81	8.28e-05				Cytochrome P450 CYP4/CYP19/CYP26 subfamilies | Cytochrome P450 CYP4/CYP19/CYP26 subfamilies
		1459087	2.1	1	2.48	0.0401808				Cytochrome P450 CYP4/CYP19/CYP26 subfamilies | Cytochrome P450 CYP4/CYP19/CYP26 subfamilies
		1483163	1.24	1	2.34	0.0253858				Cytochrome P450 CYP4/CYP19/CYP26 subfamilies | Cytochrome P450 CYP4/CYP19/CYP26 subfamilies
		1484989	3.01	0.0030604	2.56	1				Cytochrome P450 CYP2 subfamily
		1486112	2.37	0.0214228	2.49	0.00974524				Cytochrome P450 CYP2 subfamily
		1488393	4.55	1.59e-37	5.09	3.25e-44				Cytochrome P450 CYP4/CYP19/CYP26 subfamilies | Cytochrome P450 CYP4/CYP19/CYP26 subfamilies
		1497871	0.85	1	2.87	0.000384773				Cytochrome P450 CYP2 subfamily
		1506661	4.12	2.23e-39	0.29	1				Metacaspase involved in regulation of apoptosis | Metacaspase involved in regulation of apoptosis
		1507775	3.9	1.94e-20	4.25	1.59e-24				Cytochrome P450 CYP2 subfamily
		1509760	2.66	2.57e-11	1.39	1				Cytochrome P450 CYP2 subfamily
		1512016	2.86	3.37e-05	1.63	1				Cytochrome P450 CYP4/CYP19/CYP26 subfamilies | Cytochrome P450 CYP4/CYP19/CYP26 subfamilies
		1607096	3.63	4.56e-10	3.13	7.4e-05	AA2, MnP1-short	PCWDE	Lignin
		1607098	2.41	0.00617329	-1.62	1	AA2, VP1	PCWDE	Lignin
		1607099	2.68	0.00064604	1.79	1	AA2, VP3	PCWDE	Lignin
		1607100	3.16	2.84e-08	4.56	6.13e-25	AA2, MnP5-short	PCWDE	Lignin
		1607102	3.94	5.48e-25	4.95	7.43e-43	AA2, MnP3-short	PCWDE	Lignin
GO:0030246	carbohydrate binding	1444580	3.79	4.16e-18	4.09	9.97e-20	PL4_1	PCWDE	Pectin	Chitinase
		1476771	2.97	1.77e-09	2.11	1	PL8_4			beta-1,6-N-acetylglucosaminyltransferase, contains WSC domain | beta-1,6-N-acetylglucosaminyltransferase, contains WSC domain
		1484073	3.25	5.59e-15	3.05	3.28e-10				Predicted mutarotase
		1485211	4.45	3.36e-52	3.98	1.1e-30	PL4_1	PCWDE	Pectin
		1531390	7.89	1.22e-21	8.36	2.6e-116	GH13_32-CBM20			Alpha-amylase
		1535828	4.9	8.73e-84	4.86	1.79e-68	GH43-CBM35	PCWDE	Hemicellulose
		1592473	3.14	5.02e-17	3.04	9.51e-12	AA8-AA3_1, CDH	PCWDE	Cellulose	Glucose dehydrogenase/choline dehydrogenase/mandelonitrile lyase (GMC oxidoreductase family)
GO:0030248	cellulose binding	106407	2.74	1.69e-09	3.42	2.22e-24	CE1-CBM1	PCWDE	Hemicellulose	Collagens (type IV and type XIII), and related proteins
		109625	3.91	2.07e-25	1.76	1	GH7-CBM1	PCWDE	Cellulose
		481840	4.52	1.28e-24	3.95	6.14e-20	CBM1-GH5_7	PCWDE	Hemicellulose
		682179	7.69	1.54e-104	6.8	6.91e-98	CBM1-GH5_5	PCWDE	Cellulose
		1167269	5.09	2.44e-58	0.7	1	GH7-CBM1	PCWDE	Cellulose
		1397134	5.81	3.79e-85	4.98	3.31e-54	GH11	PCWDE	Hemicellulose
		1397385	5.61	4.5e-95	5.29	1.53e-75	CBM1-CE16	PCWDE	Hemicellulose
		1420400	3.45	3.33e-27	3.31	1.39e-18	CBM1-GH6	PCWDE	Cellulose
		1427424	7.59	2.53e-175	6.7	7.4e-133	CBM1-GH6	PCWDE	Cellulose
		1435402	3.33	1.27e-17	2.68	1.47e-05	CBM1-GH10	PCWDE	Hemicellulose
		1436167	1.91	1	4.49	2.96e-41	AA9-CBM1	PCWDE	Cellulose
		1443658	3.72	3.33e-25	3.47	5.34e-20	AA9-CBM1	PCWDE	Cellulose
		1483890	3.74	1.71e-29	3.66	9.73e-23	GH11-CBM1	PCWDE	Hemicellulose
		1491725	4.06	1.96e-31	4.56	4.82e-41	CBM1-GH5_5	PCWDE	Cellulose
		1491814	7.44	8.42e-104	7.77	2.54e-111	CBM1-GH5_7	PCWDE	Hemicellulose
		1506651	4.41	3.35e-42	4.24	7.01e-33	CBM1-PL3	PCWDE	Pectin
		1506660	4.38	5.43e-32	3.66	3.7e-14	CBM1-PL3	PCWDE	Pectin	Defense-related protein containing SCP domain
		1507772	6.5	4.58e-32	6.36	6.88e-50	CBM1	PCWDE	Cellulose
		1526286	6.29	9.05e-120	6.06	4.42e-124	GH131-CBM1	PCWDE	Cellulose, Hemicellulose
		1529314	2.35	0.0164958	1.74	1	CBM1-GH10	PCWDE	Hemicellulose
		1593200	5.63	2.06e-27	5.62	4.8e-15	CBM1-CE15	PCWDE	Hemicellulose
		1593878	3.63	7.13e-24	3.96	2.84e-29	GH45-CBM1	PCWDE	Cellulose
GO:0030570	pectate lyase activity	690427	2.96	3.86e-08	3.59	4.61e-18	PL3	PCWDE	Pectin
		1506651	4.41	3.35e-42	4.24	7.01e-33	CBM1-PL3	PCWDE	Pectin
		1506660	4.38	5.43e-32	3.66	3.7e-14	CBM1-PL3	PCWDE	Pectin	Defense-related protein containing SCP domain
