# Supplementary material for: A Multiomic Approach to Understand How Pleurotus eryngii Transforms Non-Woody Lignocellulosic Material
Source: J Fungi (Basel). 2021 May 28;7(6):426. doi: 10.3390/jof7060426 (PMC8227661; doi:10.3390/jof7060426)
Supplement: Supplementary file 1 [file jof-07-00426-s001.zip › Supplementary_Material/Table S6.xlsx]

## Sheet: Table S6
Table S6. Proteins predicted in P. eryngii for aromatics catabolism (see Table S2), including information about: i) the proposed enzymatic steps for 4-hydroxybenzoic acid (pHBA) conversion in which they would be involved; ii) their presence in the theoretical secretome (obtained using SECRETOOL and ApoplastP as described in the main manuscript); iii) their expression at transcriptome and exoprote…
	Expression patterns		False Discovery Rate
	Highly transcribed		FDR<0.05
	Upregulated		FDR>0.05
				Log2 normalized RNA-seq read counts								Exoproteome information (PSM)						Genes annotations
Enzymatic steps	Enzyme	Protein-ID	Theoretical secretome	Day 6 Wheat straw	Day 6 Control	Fold Change Day 6	FDR day 6	Day 14 Wheat straw	Day 14 Control	Fold Change Day 14	FDR day 14	Day 6 Wheat straw	Day 6 Control	Day 14 Wheat straw	Day 14 Control	Day 43 Wheat straw	Day 43 Control	CAZymes	CAZyme definition	GO	IPR	EC number	KEGG Definition	Catalytic Activity	Pathway	Pathway class	KOG	KOG family
1, 5	Oxidative decarboxylases	1521705	NO	10.64	6.71	3.93	4.6721e-40	11.08	7.11	3.97	6.45105e-38	0	0	0	0	0	0			metabolic process | electron transport | oxidoreductase activity | salicylate 1-monooxygenase activity	Aromatic-ring hydroxylase | Fumarate reductase/succinate dehydrogenase flavoprotein, N-terminal	1.14.13.1	Salicylate 1-monooxygenase,	Salicylate + NADH + O(2) = catechol + NAD(+) + H(2)O + CO(2),	Fluorene degradation	Biodegradation of Xenobiotics	Kynurenine 3-monooxygenase and related flavoprotein monooxygenases | Kynurenine 3-monooxygenase and related flavoprotein monooxygenases	Energy production and conversion
		1510672	NO	9.08	7.48	1.6	1	9.07	8.09	0.98	1	0	0	0	0	0	0			metabolic process | oxidoreductase activity | salicylate 1-monooxygenase activity	FAD dependent oxidoreductase | Aromatic-ring hydroxylase	1.14.13.1	Salicylate 1-monooxygenase,	Salicylate + NADH + O(2) = catechol + NAD(+) + H(2)O + CO(2),	Fluorene degradation	Biodegradation of Xenobiotics	Kynurenine 3-monooxygenase and related flavoprotein monooxygenases | Kynurenine 3-monooxygenase and related flavoprotein monooxygenases	Energy production and conversion
		1437817	NO	8.25	7.71	0.53	1	8.85	8.93	-0.08	1	0	0	0	0	0	0			metabolic process | oxidoreductase activity | salicylate 1-monooxygenase activity	FAD dependent oxidoreductase | Aromatic-ring hydroxylase	1.14.13.1	Salicylate 1-monooxygenase,	Salicylate + NADH + O(2) = catechol + NAD(+) + H(2)O + CO(2),	Fluorene degradation	Biodegradation of Xenobiotics	Kynurenine 3-monooxygenase and related flavoprotein monooxygenases | Kynurenine 3-monooxygenase and related flavoprotein monooxygenases	Energy production and conversion
2, 4	Hydroxylase	1471020	NO	9.75	7.81	1.94	1	10.4	8.09	2.31	0.0390635	0	0	0	0	0	0			aromatic compound metabolic process | metabolic process | monooxygenase activity | electron transport | oxidoreductase activity | phenol 2-monooxygenase activity	FAD-dependent pyridine nucleotide-disulphide oxidoreductase | Aromatic-ring hydroxylase | Monooxygenase, FAD-binding | Thioredoxin-like fold | Pyridine nucleotide-disulphide oxidoreductase, class I | Phenol hydroxylase, C-terminal dimerisation	1.14.13.7	Phenol 2-monooxygenase,	Phenol + NADPH + O(2) = catechol + NADP(+) + H(2)O,	gamma-Hexachlorocyclohexane degradation	Biodegradation of Xenobiotics	Monooxygenase involved in coenzyme Q (ubiquinone) biosynthesis | Monooxygenase involved in coenzyme Q (ubiquinone) biosynthesis	Coenzyme transport and metabolism
3	Hydroxylation by cytochrome P450	1484875	NO	11.45	11.99	-0.53	1	10.62	9.57	1.05	1	0	0	0	0	0	0			iron ion binding | monooxygenase activity | electron transport | heme binding | fluorene oxygenase activity | mono-butyltin dioxygenase activity | limonene 8-monooxygenase activity | tri-n-butyltin dioxygenase activity | di-n-butyltin dioxygenase activity | methylsilanetriol hydroxylase activity | methyl tertiary butyl ether 3-monooxygenase activity | 4-nitrocatechol 4-monooxygenase activity | 4-…	Cytochrome P450 | Cytochrome P450, E-class, group I	1.14.-.-	Acting on paired donors, with incorporation or reduction of		gamma-Hexachlorocyclohexane degradation	Biodegradation of Xenobiotics	Cytochrome P450 CYP3/CYP5/CYP6/CYP9 subfamilies	Secondary metabolites biosynthesis, transport and catabolism
6	Dioxygenase
7	Ring-cleaving dioxygenase	1440135	NO	9.6	9.09	0.51	1	9.92	9.78	0.14	1	0	0	0	0	0	0			catalytic activity | aromatic compound metabolic process | ferric iron binding | iron ion binding | oxidoreductase activity, acting on single donors with incorporation of molecular oxygen, incorporation of two atoms of oxygen | catechol metabolic process | catechol 1,2-dioxygenase activity | hydroxyquinol 1,2-dioxygenase activity	Intradiol ring-cleavage dioxygenase, C-terminal | Intradiol ring-cleavage dioxygenase, core | Catechol dioxygenase, N-terminal	1.13.11.37	Hydroxyquinol 1,2-dioxygenase,	Benzene-1,2,4-triol + O(2) = 3-hydroxy-cis,cis-muconate,	Benzoate degradation via hydroxylation	Biodegradation of Xenobiotics
8, 13	4-Hydroxymuconic semialdehyde dehydrogenase/ Aldehyde dehydrogenase	1456897	NO	14.31	13.64	0.67	1	14.44	13.27	1.17	1	2	0	23	0	29	0			metabolic process | oxidoreductase activity | aldehyde dehydrogenase (NAD) activity	Aldehyde dehydrogenase | Aldehyde/histidinol dehydrogenase | Aldehyde dehydrogenase, conserved site	1.2.1.3	Aldehyde dehydrogenase (NAD+),	An aldehyde + NAD(+) + H(2)O = an acid + NADH,	1,2-Dichloroethane degradation	Biodegradation of Xenobiotics	Aldehyde dehydrogenase	Energy production and conversion
		1436180	NO	13.71	11.93	1.78	1	13.96	11.95	2.02	1	0	0	24	0	31	0			metabolic process | oxidoreductase activity | aldehyde dehydrogenase (NAD) activity	Aldehyde dehydrogenase | Aldehyde/histidinol dehydrogenase | Aldehyde dehydrogenase, conserved site	1.2.1.3	Aldehyde dehydrogenase (NAD+),	An aldehyde + NAD(+) + H(2)O = an acid + NADH,	1,2-Dichloroethane degradation	Biodegradation of Xenobiotics	Aldehyde dehydrogenase	Energy production and conversion
9	Maleylacetate reductase	1550397	NO	10.42	10.63	-0.21	1	11.21	10.61	0.6	1	0	0	0	0	5	0			metabolic process | metal ion binding | oxidoreductase activity | alcohol dehydrogenase activity | alcohol dehydrogenase activity, metal ion-independent | alcohol dehydrogenase activity, zinc-dependent | alcohol dehydrogenase activity, iron-dependent	Iron-containing alcohol dehydrogenase	1.1.1.1	Alcohol dehydrogenase,	An alcohol + NAD(+) = an aldehyde or ketone + NADH,	Bile acid biosynthesis	Lipid Metabolism	Alcohol dehydrogenase, class IV	Energy production and conversion
10	Ketoacid CoA transferase	1380612	NO	10.32	11.33	-1.01	1	10.32	9.98	0.34	1	0	0	0	0	0	0			metabolic process | CoA-transferase activity | 3-oxoacid CoA-transferase activity	Coenzyme A transferase | 3-oxoacid CoA-transferase | 3-oxoacid CoA-transferase, subunit B | 3-oxoacid CoA-transferase, subunit A | Coenzyme A transferase active site	2.8.3.5	3-oxoacid CoA-transferase,	Succinyl-CoA + a 3-oxo acid = succinate + a 3-oxo-acyl-CoA,	Valine, leucine and isoleucine degradation	Amino Acid Metabolism	Succinyl-CoA:alpha-ketoacid-CoA transferase	Energy production and conversion
11	Thiolase	1443243	NO	12.42	13.02	-0.6	1	12.41	12.88	-0.47	1	0	0	6	0	8	0			catalytic activity | metabolic process | acetyl-CoA C-acetyltransferase activity	Thiolase-like | Thiolase	2.3.1.9	Acetyl-CoA C-acetyltransferase,	2 acetyl-CoA = CoA + acetoacetyl-CoA,	Fatty acid biosynthesis (path 2)	Lipid Metabolism	Acetyl-CoA acetyltransferase	Lipid transport and metabolism
		1491356	NO	12.18	13.08	-0.9	1	12.44	11.92	0.53	1	0	0	3	0	10	0			catalytic activity | metabolic process | acetyl-CoA C-acyltransferase activity	Thiolase-like | Thiolase	2.3.1.16	Acetyl-CoA C-acyltransferase,	Acyl-CoA + acetyl-CoA = CoA + 3-oxoacyl-CoA,	Benzoate degradation via hydroxylation	Biodegradation of Xenobiotics	3-oxoacyl CoA thiolase	Lipid transport and metabolism
12	Carboxylic acid reductase (CARs)	1387871	NO	10.46	9.96	0.5	1	9.88	9.05	0.83	1	0	0	0	0	0	0			binding | catalytic activity | metabolic process | cofactor binding	AMP-dependent synthetase and ligase | NAD(P)-binding | Phosphopantetheine-binding | Acyl carrier protein-like | Male sterility, NAD-binding						Non-ribosomal peptide synthetase/alpha-aminoadipate reductase and related enzymes	Secondary metabolites biosynthesis, transport and catabolism
		1431563	NO	10.11	7.14	2.96	2.80501e-12	10.55	7.4	3.15	1.97287e-14	0	0	0	0	0	0			binding | catalytic activity | metabolic process | cofactor binding | L-aminoadipate-semialdehyde dehydrogenase activity | aminoadipate-semialdehyde dehydrogenase complex	AMP-dependent synthetase and ligase | NAD(P)-binding | Phosphopantetheine-binding | Acyl carrier protein-like | Male sterility, NAD-binding	1.2.1.31	Aminoadipate-semialdehyde dehydrogenase,	L-2-aminoadipate 6-semialdehyde + NADP(+) + H(2)O = L-2-aminoadipate + NADPH,	Lysine biosynthesis	Amino Acid Metabolism	Non-ribosomal peptide synthetase/alpha-aminoadipate reductase and related enzymes	Secondary metabolites biosynthesis, transport and catabolism
		1387810	NO	11.75	10.65	1.1	1	11.54	10.56	0.97	1	0	0	0	0	0	0			binding | catalytic activity | metabolic process | cofactor binding | L-aminoadipate-semialdehyde dehydrogenase activity | aminoadipate-semialdehyde dehydrogenase complex	AMP-dependent synthetase and ligase | NAD(P)-binding | Phosphopantetheine-binding | Acyl carrier protein-like | Male sterility, NAD-binding	1.2.1.31	Aminoadipate-semialdehyde dehydrogenase,	L-2-aminoadipate 6-semialdehyde + NADP(+) + H(2)O = L-2-aminoadipate + NADPH,	Lysine biosynthesis	Amino Acid Metabolism	Non-ribosomal peptide synthetase/alpha-aminoadipate reductase and related enzymes	Secondary metabolites biosynthesis, transport and catabolism
		1491731	NO	9.29	8.94	0.35	1	9.09	8.63	0.46	1	0	0	0	0	0	0			binding | catalytic activity | metabolic process | cofactor binding | L-aminoadipate-semialdehyde dehydrogenase activity | aminoadipate-semialdehyde dehydrogenase complex	AMP-dependent synthetase and ligase | Ankyrin | NAD(P)-binding | Phosphopantetheine-binding | Acyl carrier protein-like | Male sterility, NAD-binding	1.2.1.31	Aminoadipate-semialdehyde dehydrogenase,	L-2-aminoadipate 6-semialdehyde + NADP(+) + H(2)O = L-2-aminoadipate + NADPH,	Lysine biosynthesis	Amino Acid Metabolism	Non-ribosomal peptide synthetase/alpha-aminoadipate reductase and related enzymes	Secondary metabolites biosynthesis, transport and catabolism
14	Alcohol dehydrogenase	1446680	NO	9.55	7.9	1.65	1	9.52	8.33	1.2	1	0	0	5	0	4	0			oxidoreductase activity | C-3 sterol dehydrogenase (C-4 sterol decarboxylase) activity | 3-keto sterol reductase activity | aldo-keto reductase activity | isocitrate dehydrogenase activity | mevaldate reductase activity | gluconate dehydrogenase activity | steroid dehydrogenase activity | epoxide dehydrogenase activity | 5-exo-hydroxycamphor dehydrogenase activity | 2-hydroxytetrahydrofuran dehyd…	Aldo/keto reductase	1.1.1.-	With NAD(+) or NADP(+) as acceptor,		Bile acid biosynthesis	Lipid Metabolism	Voltage-gated shaker-like K+ channel, subunit beta/KCNAB	Energy production and conversion
		1409466	NO	9.12	7.62	1.5	1	10.28	7.94	2.34	1	0	0	5	0	4	0			oxidoreductase activity | C-3 sterol dehydrogenase (C-4 sterol decarboxylase) activity | 3-keto sterol reductase activity | aldo-keto reductase activity | isocitrate dehydrogenase activity | mevaldate reductase activity | gluconate dehydrogenase activity | steroid dehydrogenase activity | epoxide dehydrogenase activity | 5-exo-hydroxycamphor dehydrogenase activity | 2-hydroxytetrahydrofuran dehyd…	Aldo/keto reductase	1.1.1.-	With NAD(+) or NADP(+) as acceptor,		Bile acid biosynthesis	Lipid Metabolism	Voltage-gated shaker-like K+ channel, subunit beta/KCNAB	Energy production and conversion
		1512574	NO	3.68	3.55	0.12	1	3.99	4.81	-0.82	1	0	0	0	0	0	0			oxidoreductase activity | C-3 sterol dehydrogenase (C-4 sterol decarboxylase) activity | 3-keto sterol reductase activity | aldo-keto reductase activity | isocitrate dehydrogenase activity | mevaldate reductase activity | gluconate dehydrogenase activity | steroid dehydrogenase activity | epoxide dehydrogenase activity | 5-exo-hydroxycamphor dehydrogenase activity | 2-hydroxytetrahydrofuran dehyd…	Aldo/keto reductase	1.1.1.-	With NAD(+) or NADP(+) as acceptor,		Bile acid biosynthesis	Lipid Metabolism	Voltage-gated shaker-like K+ channel, subunit beta/KCNAB	Energy production and conversion
		1446682	NO	14.14	11.3	2.84	1	15.23	12.47	2.76	1	2	0	15	0	23	0			oxidoreductase activity | C-3 sterol dehydrogenase (C-4 sterol decarboxylase) activity | 3-keto sterol reductase activity | aldo-keto reductase activity | isocitrate dehydrogenase activity | mevaldate reductase activity | gluconate dehydrogenase activity | steroid dehydrogenase activity | epoxide dehydrogenase activity | 5-exo-hydroxycamphor dehydrogenase activity | 2-hydroxytetrahydrofuran dehyd…	Aldo/keto reductase	1.1.1.-	With NAD(+) or NADP(+) as acceptor,		Bile acid biosynthesis	Lipid Metabolism	Voltage-gated shaker-like K+ channel, subunit beta/KCNAB	Energy production and conversion
		1426281	NO	13.64	11.17	2.47	0.0184419	14.78	11.71	3.07	1.54766e-07	0	0	3	0	29	0			oxidoreductase activity | aryl-alcohol dehydrogenase (NADP+) activity	Aldo/keto reductase	1.1.1.91	Aryl-alcohol dehydrogenase (NADP+),	An aromatic alcohol + NADP(+) = an aromatic aldehyde + NADPH,			Voltage-gated shaker-like K+ channel, subunit beta/KCNAB	Energy production and conversion
		1556441	NO	10.23	9.27	0.96	1	10.25	10.58	-0.32	1	0	0	0	0	0	0			oxidoreductase activity | aryl-alcohol dehydrogenase (NADP+) activity	Aldo/keto reductase	1.1.1.91	Aryl-alcohol dehydrogenase (NADP+),	An aromatic alcohol + NADP(+) = an aromatic aldehyde + NADPH,			Voltage-gated shaker-like K+ channel, subunit beta/KCNAB	Energy production and conversion
		1505848	NO	11.89	13.56	-1.66	1	13.67	12.07	1.6	1	0	0	0	0	10	0			binding | intracellular | catalytic activity | metabolic process | structural constituent of ribosome | ribosome | translation | alcohol dehydrogenase activity | alcohol dehydrogenase activity, metal ion-independent | alcohol dehydrogenase activity, zinc-dependent | alcohol dehydrogenase activity, iron-dependent	NAD(P)-binding | Alcohol dehydrogenase, zinc-binding | Alcohol dehydrogenase GroES-like | GroES-like | Ribosomal protein S2	1.1.1.1	Alcohol dehydrogenase,	An alcohol + NAD(+) = an aldehyde or ketone + NADH,	Bile acid biosynthesis	Lipid Metabolism	Zinc-binding oxidoreductase | Zinc-binding oxidoreductase	Energy production and conversion
		1420315	NO	11.37	10.38	0.99	1	12.63	10.11	2.52	0.000215822	0	0	0	0	9	0			binding | intracellular | catalytic activity | metabolic process | structural constituent of ribosome | ribosome | translation | alcohol dehydrogenase activity | alcohol dehydrogenase activity, metal ion-independent | alcohol dehydrogenase activity, zinc-dependent | alcohol dehydrogenase activity, iron-dependent	NAD(P)-binding | Alcohol dehydrogenase, zinc-binding | Alcohol dehydrogenase GroES-like | GroES-like | Ribosomal protein S2	1.1.1.1	Alcohol dehydrogenase,	An alcohol + NAD(+) = an aldehyde or ketone + NADH,	Bile acid biosynthesis	Lipid Metabolism	Zinc-binding oxidoreductase | Zinc-binding oxidoreductase	Energy production and conversion
15	Alcohol oxidase	319386	NO	10.61	9.78	0.83	1	10.49	8.37	2.12	1	0	0	0	0	3	0	AA3_3, MOX	Alcohol oxidase	FAD binding | oxidoreductase activity, acting on CH-OH group of donors | alcohol metabolic process | choline dehydrogenase activity	Glucose-methanol-choline oxidoreductase, N-terminal | Glucose-methanol-choline oxidoreductase, C-terminal | Glucose-methanol-choline oxidoreductase	1.1.99.1	Choline dehydrogenase,	Choline + acceptor = betaine aldehyde + reduced acceptor,	Glycine, serine and threonine metabolism	Amino Acid Metabolism	Glucose dehydrogenase/choline dehydrogenase/mandelonitrile lyase (GMC oxidoreductase family)	General function prediction only
		1435398	NO	8.81	6.85	1.96	1	9.21	7.45	1.76	1	0	0	0	0	0	0	AA3_3, MOX	Alcohol oxidase	FAD binding | oxidoreductase activity, acting on CH-OH group of donors | choline dehydrogenase activity	MFS general substrate transporter | Glucose-methanol-choline oxidoreductase, N-terminal | Glucose-methanol-choline oxidoreductase, C-terminal	1.1.99.1	Choline dehydrogenase,	Choline + acceptor = betaine aldehyde + reduced acceptor,	Glycine, serine and threonine metabolism	Amino Acid Metabolism	Glucose dehydrogenase/choline dehydrogenase/mandelonitrile lyase (GMC oxidoreductase family)	General function prediction only
16	Aldehyde oxidase	1450186	NO	9.14	9.21	-0.07	1	9.01	10.19	-1.18	1	0	0	0	0	0	0			catalytic activity | oxidoreductase activity | FAD binding	FAD linked oxidase, N-terminal | FAD-binding, type 2 | Berberine/berberine-like						Proteins containing the FAD binding domain	Energy production and conversion
		1429945	NO	11.9	12.12	-0.21	1	12.66	10.85	1.8	1	0	0	18	0	29	0
		1405413	NO	6.66	6.84	-0.18	1	6.62	6.71	-0.08	1	0	0	0	0	0	0
17	4-O-methyl transferase	1588611	NO	8.02	7.89	0.14	1	8.58	8.33	0.25	1	0	0	0	0	0	0			catalytic activity | glucan 1,4-alpha-glucosidase activity | O-methyltransferase activity	O-methyltransferase, family 2 | Orn/DAP/Arg decarboxylase 2	3.2.1.3	Glucan 1,4-alpha-glucosidase,	Hydrolysis of terminal 1,4-linked alpha-D-glucose residues successively from non-reducing ends of the chains with release of beta-D-glucose,	Starch and sucrose metabolism	Metabolism of Complex Carbohydrates	Splicing coactivator SRm160/300, subunit SRm160 (contains PWI domain) | Splicing coactivator SRm160/300, subunit SRm160 (contains PWI domain)	RNA processing and modification
		1507445	NO	7.22	7.43	-0.21	1	7.65	7.45	0.2	1	0	0	0	0	0	0			catalytic activity | O-methyltransferase activity | quercetin 3-O-methyltransferase activity	O-methyltransferase, family 2 | Orn/DAP/Arg decarboxylase 2	2.1.1.76	Quercetin 3-O-methyltransferase,	S-adenosyl-L-methionine + 3,5,7,3',4'-pentahydroxyflavone = S-adenosyl-L-homocysteine + 3-methoxy-5,7,3',4'-tetrahydroxyflavone,	Flavonoids, stilbene and lignin biosynthesis	Biosynthesis of Secondary Metabolites	Hydroxyindole-O-methyltransferase and related SAM-dependent methyltransferases	General function prediction only
		1428432	NO	6.28	6.25	0.03	1	6.02	7.07	-1.05	1	0	0	0	0	0	0			catalytic activity | O-methyltransferase activity	O-methyltransferase, family 2 | Orn/DAP/Arg decarboxylase 2						Hydroxyindole-O-methyltransferase and related SAM-dependent methyltransferases	General function prediction only
18	Demethylase
