# Supplementary material for: A Multiomic Approach to Understand How Pleurotus eryngii Transforms Non-Woody Lignocellulosic Material
Source: J Fungi (Basel). 2021 May 28;7(6):426. doi: 10.3390/jof7060426 (PMC8227661; doi:10.3390/jof7060426)
Supplement: Supplementary file 1 [file jof-07-00426-s001.zip › Supplementary_Material/Table S7.xlsx]

## Sheet: Lipid transport and metabolism
Table S7. Proteins putatively involved in lipid transport and metabolism identified in the transcriptome and exoproteome of P. eryngii grown on wheat straw and in glucose-ammonium medium. The table includes log2 normalized RNA-seq read counts (averaged from the replicates at all growth points) and shows fold-change differences in gene expression between substrates (wheat straw vs glucose-ammonium…
		Secretion predicted by Secretool/ApoplastP	YES/YES =	YES		Expression patterns		False Discovery Rate
			YES/NO =	YES		Highly transcribed		FDR<0.05
			NO/YES =	YES		Upregulated		FDR>0.05
			NO/NO =	NO
Gene information			Log2 normalized RNA-seq read counts								Exoproteome (PSM)
Order	Protein-ID	Theoretical secretome	Day 6 Wheat straw	Day 6 Control	Fold Change Day 6	FDR day 6	Day 14 Wheat straw	Day 14 Control	Fold Change Day 14	FDR day 14	Day 6 Wheat straw2	Day 6 Control	Day 14 Wheat straw	Day 14 Control	Day 43 Wheat straw	Day 43 Control	GO	IPR	EC number	KEGG	Catalytic Activity	Pathway	Pathway class	KOG	KOG family
11845	1507090	YES	11.78	7.47	4.31	0.000501955	15.36	7.06	8.3	6.33457e-13	7	0	6	0	20	7		Thaumatin, pathogenesis-related
11844	1484295	YES	13.81	6.77	7.03	1.38959e-204	13.78	6.92	6.86	9.22615e-173	11	0	21	0	23	0	hydrolase activity, hydrolyzing O-glycosyl compounds | carbohydrate metabolic process	Glycoside hydrolase, family 7 | Concanavalin A-like lectin/glucanase
11843	1458535	NO	15.75	6.07	9.68	1.38987e-135	16.05	7.68	8.38	5.03283e-77	0	0	20	0	41	0	FAD binding | oxidoreductase activity, acting on CH-OH group of donors | alcohol metabolic process | choline dehydrogenase activity	Glucose-methanol-choline oxidoreductase, N-terminal | Glucose-methanol-choline oxidoreductase, C-terminal | Glucose-methanol-choline oxidoreductase	1.1.99.1	Choline dehydrogenase,	Choline + acceptor = betaine aldehyde + reduced acceptor,	Glycine, serine and threonine metabolism	Amino Acid Metabolism	Glucose dehydrogenase/choline dehydrogenase/mandelonitrile lyase (GMC oxidoreductase family)	General function prediction only
11842	624646	YES	13.19	7.97	5.23	3.38745e-91	12.77	8.49	4.27	1.00997e-38	4	0	19	0	18	19	L-arabinose metabolic process | alpha-N-arabinofuranosidase activity	Glycoside hydrolase, catalytic core | Alpha-L-arabinofuranosidase, C-terminal | Galactose-binding like
11841	416606	YES	13.97	8.07	5.9	3.4612e-10	13.82	9.56	4.25	0.03179	4	0	5	0	9	2		Immunoglobulin E-set | Glyoxal oxidase, N-terminal | Region of unknown function DUF1929 | Galactose oxidase/kelch, beta-propeller
11840	1535828	YES	12.83	7.93	4.9	8.72777e-84	12.65	7.78	4.86	1.79037e-68	7	0	15	0	9	0	hydrolase activity, hydrolyzing O-glycosyl compounds | carbohydrate metabolic process | carbohydrate binding	Galactose-binding like | Glycoside hydrolase, family 43 | Carbohydrate binding family 6
11839	1510083	YES	12.98	9.45	3.52	1.47413e-06	12.43	7.77	4.66	1.12674e-13	0	0	2	0	9	5
11838	1504677	YES	13.81	8.9	4.92	6.54791e-15	13.22	8.23	4.98	2.11756e-12	3	0	3	0	0	0	exo-alpha-sialidase activity		3.2.1.18	Exo-alpha-sialidase,	Hydrolysis of alpha-(2->3)-, alpha-(2->6)-, alpha-(2->8)-glycosidic linkages of terminal sialic residues in oligosaccharides, glycoproteins, glycolipids, colominic acid and synthetic substrates,	N-Glycan degradation	Metabolism of Complex Carbohydrates	Transcription initiation factor TFIID, subunit BDF1 and related bromodomain proteins	Transcription
11837	1503970	NO	12.56	7.81	4.76	1.14334e-106	12.76	8.25	4.5	5.82246e-78	0	0	0	0	0	0	transport | transporter activity | integral to membrane	MFS general substrate transporter | Major facilitator superfamily MFS-1 | Major facilitator superfamily						Permease of the major facilitator superfamily	Carbohydrate transport and metabolism
11836	1483657	YES	13.09	8.79	4.3	1.56211e-12	12.57	7.34	5.23	5.99319e-18	0	0	0	0	0	0
11835	1446622	YES	13.89	7.72	6.17	2.26318e-117	12.69	7.47	5.22	1.02775e-59	6	0	9	0	6	14	proteolysis | subtilase activity | identical protein binding | negative regulation of catalytic activity | cerevisin activity	Peptidase S8 and S53, subtilisin, kexin, sedolisin | Proteinase inhibitor, propeptide | Proteinase inhibitor I9, subtilisin propeptide	3.4.21.48	Cerevisin,	Hydrolysis of proteins with broad specificity, and of BZ-Arg-OET > Ac-Tyr-OET, Does not hydrolyse peptide amides,			Subtilisin-related protease/Vacuolar protease B	Posttranslational modification, protein turnover, chaperones
10368	788392	NO	10.12	4.64	5.49	4.81204e-57	10.03	3.79	6.23	9.18134e-52	0	0	0	0	0	0	binding | catalytic activity | metabolic process | oxidoreductase activity	NAD(P)-binding | Glucose/ribitol dehydrogenase | Short-chain dehydrogenase/reductase SDR						Mitochondrial/plastidial beta-ketoacyl-ACP reductase	Lipid transport and metabolism
11833	1390801	YES	12.71	8.34	4.36	5.21163e-35	12.13	6.98	5.14	1.14465e-48	7	0	0	0	0	0		Peptidase M43B, pregnancy-associated plasma-A | Beta-ketoacyl synthase, N-terminal
11832	1367139	NO	13.37	8.41	4.97	9.04635e-19	13.06	9.07	3.99	1.74911e-06	0	0	0	0	0	0
11831	583300	YES	12.34	10.04	2.31	0.0165401	12.37	8.6	3.77	9.75142e-43	0	0	0	0	0	0	electron transport | electron carrier activity | copper ion binding	Cupredoxin | Blue (type 1) copper subtype | Blue (type 1) copper domain
11830	230583	NO	11.73	8.61	3.12	3.36855e-11	11.92	8.01	3.91	7.22926e-24	0	0	0	0	0	0	transport | membrane | transporter activity | integral to membrane | sugar:hydrogen symporter activity | carbohydrate transport | L-arabinose isomerase activity	MFS general substrate transporter | Major facilitator superfamily | General substrate transporter | Sugar transporter	5.3.1.4	L-arabinose isomerase,	L-arabinose = L-ribulose,	Pentose and glucuronate interconversions	Carbohydrate Metabolism	Predicted transporter (major facilitator superfamily)	General function prediction only
11829	1578257	NO	11.75	9.32	2.44	0.000506466	11.88	8.95	2.93	8.59473e-12	0	0	0	0	0	0	hydrolase activity, hydrolyzing O-glycosyl compounds | carbohydrate metabolic process | beta-glucosidase activity	Glycoside hydrolase, catalytic core | Glycoside hydrolase, family 1	3.2.1.21	Beta-glucosidase,	Hydrolysis of terminal, non-reducing beta-D-glucose residues with release of beta-D-glucose,	Starch and sucrose metabolism	Metabolism of Complex Carbohydrates	Beta-glucosidase, lactase phlorizinhydrolase, and related proteins	Carbohydrate transport and metabolism
11834	1444702	YES	12.78	7.97	4.81	3.16712e-61	12.99	6.99	6	3.01345e-94	0	0	0	0	4	0	catalytic activity | lipid metabolic process | triacylglycerol lipase activity | phospholipase activity | lipase activity | 1-oxa-2-oxocycloheptane lactonase activity | sulfolactone hydrolase activity | 3,4-dihydrocoumarin hydrolase activity | butyrolactone hydrolase activity	Lipase, class 3 | Lipase, active site	3.1.1.-	Carboxylic ester hydrolases,		2,4-Dichlorobenzoate degradation	Biodegradation of Xenobiotics	Predicted lipase	Lipid transport and metabolism
11827	1448006	NO	11.77	8.71	3.06	2.24527e-08	11.53	8.57	2.96	3.94671e-06	0	0	0	0	0	0		Cyanovirin-N
11826	1445872	NO	11.78	8.55	3.22	2.03808e-23	11.95	8.53	3.41	3.51114e-25	9	0	10	0	12	0	metabolic process | hydrolase activity, acting on carbon-nitrogen (but not peptide) bonds, in linear amides | formamidase activity	Acetamidase/Formamidase	3.5.1.49	Formamidase,	Formamide + H(2)O = formate + NH(3),	Glyoxylate and dicarboxylate metabolism	Carbohydrate Metabolism
11825	1445020	NO	12.19	9.1	3.09	1.62719e-16	12.58	8.44	4.14	9.8482e-47	0	0	0	0	0	0		MFS general substrate transporter | Major facilitator superfamily MFS-1
11824	1443948	NO	11.71	8.94	2.77	2.86477e-06	12.03	8.68	3.35	3.01242e-13	0	0	0	0	0	0		MFS general substrate transporter | Major facilitator superfamily MFS-1						Permease of the major facilitator superfamily	Carbohydrate transport and metabolism
11823	1398709	YES	11.87	9.45	2.42	0.0608563	11.92	7.78	4.13	2.53156e-29	13	0	23	5	18	7	hydrolase activity, hydrolyzing O-glycosyl compounds | carbohydrate metabolic process | beta-glucosidase activity	Glycoside hydrolase, family 3, N-terminal | Glycoside hydrolase, family 3, C-terminal | Glycoside hydrolase, catalytic core	3.2.1.21	Beta-glucosidase,	Hydrolysis of terminal, non-reducing beta-D-glucose residues with release of beta-D-glucose,	Starch and sucrose metabolism	Metabolism of Complex Carbohydrates
11822	106407	YES	12.06	9.32	2.74	1.69089e-09	12.03	8.61	3.42	2.21859e-24	0	0	6	0	10	4	extracellular region | hydrolase activity, hydrolyzing O-glycosyl compounds | carbohydrate metabolic process | cellulose binding	Cellulose-binding region, fungal | Esterase, PHB depolymerase						Collagens (type IV and type XIII), and related proteins	Extracellular structures
11821	804608	NO	10.91	7.3	3.61	4.54588e-30	11.31	8.07	3.24	3.21544e-16	0	0	0	0	0	0	iron ion binding | monooxygenase activity | electron transport | heme binding | unspecific monooxygenase activity	Cytochrome P450 | Cytochrome P450, E-class, group I	1.14.14.1	Unspecific monooxygenase,	RH + reduced flavoprotein + O(2) = ROH + oxidized flavoprotein + H(2)O,	Tryptophan metabolism	Amino Acid Metabolism	Cytochrome P450 CYP2 subfamily	Secondary metabolites biosynthesis, transport and catabolism
11820	654542	NO	10.64	8.68	1.96	1	11.42	8.12	3.3	1.01929e-12	0	0	0	0	0	0	transport | membrane | transporter activity	Na+/solute symporter						Urea transporter	Amino acid transport and metabolism
11819	645571	YES	11.44	8.44	3	1.70254e-07	11.53	8.07	3.46	2.06736e-11	12	0	8	2	3	0	proteolysis | peptidase activity	Peptidase M28	3.4.11.10	Bacterial leucyl aminopeptidase,	Release of an N-terminal amino acid, preferentially leucine, but not glutamic or aspartic acids,			Transferrin receptor and related proteins containing the protease-associated (PA) domain | Transferrin receptor and related proteins containing the protease-associated (PA) domain | Transferrin receptor and related proteins containing the protease-associated (PA) domain	Posttranslational modification, protein turnover, chaperones
11818	1592473	YES	11.27	8.13	3.14	5.0174e-17	10.83	7.79	3.04	9.50513e-12	0	0	13	0	16	0	catalytic activity | electron transport | oxidoreductase activity | FAD binding | oxidoreductase activity, acting on CH-OH group of donors | choline dehydrogenase activity | carbohydrate binding | carbohydrate catabolic process	FAD-dependent pyridine nucleotide-disulphide oxidoreductase | Glucose-methanol-choline oxidoreductase, N-terminal | Glucose-methanol-choline oxidoreductase, C-terminal | Pyridine nucleotide-disulphide oxidoreductase, class I | Carbohydrate-binding family 9/cellobiose dehydrogenase, cytochrome	1.1.99.1	Choline dehydrogenase,	Choline + acceptor = betaine aldehyde + reduced acceptor,	Glycine, serine and threonine metabolism	Amino Acid Metabolism	Glucose dehydrogenase/choline dehydrogenase/mandelonitrile lyase (GMC oxidoreductase family)	General function prediction only
11817	1590086	YES	11.03	8.05	2.98	1.05321e-16	10.92	8.31	2.6	3.99292e-06	0	0	3	0	4	0	carbohydrate metabolic process | beta-galactosidase activity | beta-galactosidase complex	Glycoside hydrolase, catalytic core | Glycoside hydrolase, family 35	3.2.1.23	Beta-galactosidase,	Hydrolysis of terminal, non-reducing beta-D-galactose residues in beta-D-galactosides,	Glycosaminoglycan degradation	Metabolism of Complex Carbohydrates	Beta-galactosidase	Carbohydrate transport and metabolism
11816	1586301	NO	10.69	8.27	2.42	0.00105454	11.39	7.73	3.66	8.47929e-32	0	0	12	0	11	0	L-phenylalanine catabolic process | homogentisate 1,2-dioxygenase activity | tyrosine metabolic process	Cupin, RmlC-type | Homogentisate 1,2-dioxygenase	1.13.11.5	Homogentisate 1,2-dioxygenase,	Homogentisate + O(2) = 4-maleylacetoacetate,	Styrene degradation	Biodegradation of Xenobiotics	Homogentisate 1,2-dioxygenase	Amino acid transport and metabolism
11815	1486682	NO	11.33	7.9	3.43	7.86617e-31	11.28	7.8	3.48	9.11156e-28	0	0	8	0	11	0	hydrolase activity, hydrolyzing O-glycosyl compounds | carbohydrate metabolic process | beta-glucosidase activity	Glycoside hydrolase, catalytic core | Glycoside hydrolase, family 1	3.2.1.21	Beta-glucosidase,	Hydrolysis of terminal, non-reducing beta-D-glucose residues with release of beta-D-glucose,	Starch and sucrose metabolism	Metabolism of Complex Carbohydrates	Beta-glucosidase, lactase phlorizinhydrolase, and related proteins	Carbohydrate transport and metabolism
11814	1484989	NO	10.85	7.84	3.01	0.0030604	11.04	8.48	2.56	1	0	0	0	0	0	0	iron ion binding | monooxygenase activity | electron transport | heme binding | unspecific monooxygenase activity	Cytochrome P450 | Cytochrome P450, E-class, group I	1.14.14.1	Unspecific monooxygenase,	RH + reduced flavoprotein + O(2) = ROH + oxidized flavoprotein + H(2)O,	Tryptophan metabolism	Amino Acid Metabolism	Cytochrome P450 CYP2 subfamily	Secondary metabolites biosynthesis, transport and catabolism
10887	1488393	NO	10.02	5.48	4.55	1.58582e-37	10.02	4.93	5.09	3.25316e-44	0	0	0	0	0	0	iron ion binding | monooxygenase activity | electron transport | heme binding | unspecific monooxygenase activity	Cytochrome P450 | Cytochrome P450, E-class, group I	1.14.14.1	Unspecific monooxygenase,	RH + reduced flavoprotein + O(2) = ROH + oxidized flavoprotein + H(2)O,	Tryptophan metabolism	Amino Acid Metabolism	Cytochrome P450 CYP4/CYP19/CYP26 subfamilies | Cytochrome P450 CYP4/CYP19/CYP26 subfamilies	Lipid transport and metabolism
11812	1479727	YES	11.09	8.11	2.98	2.66134e-11	10.68	7.9	2.79	4.60758e-06	0	0	5	0	8	7	catalytic activity	Six-hairpin glycosidase-like | Glycosyl hydrolase, family 88
11811	1453779	NO	11.19	7.67	3.51	1.84059e-17	11.61	7.95	3.66	2.8031e-16	0	0	0	0	0	0	electron transport | oxidoreductase activity | FAD binding | flavin-containing monooxygenase activity	FAD-dependent pyridine nucleotide-disulphide oxidoreductase | Pyridine nucleotide-disulphide oxidoreductase, NAD-binding region | Pyridine nucleotide-disulphide oxidoreductase, class I | Adrenodoxin reductase	1.14.13.8	Dimethylaniline monooxygenase (N-oxide forming),	N,N-dimethylaniline + NADPH + O(2) = N,N-dimethylaniline N-oxide + NADP(+) + H(2)O,			Flavin-containing monooxygenase	Secondary metabolites biosynthesis, transport and catabolism
11810	1452091	NO	11.35	8.02	3.32	1.16652e-20	11.16	8.07	3.08	1.42353e-11	2	0	7	0	9	0		Protein of unknown function DUF1680
11809	1450178	YES	10.38	7.93	2.45	0.00927532	11.11	8.26	2.85	3.24985e-06	0	0	0	0	0	0		Glycoside hydrolase, family 61
11808	1446471	NO	10.79	8.37	2.43	0.0318561	10.98	8.22	2.76	0.000420754	0	0	0	0	0	0	membrane | transporter activity | oligopeptide transport	MFS general substrate transporter | TGF-beta receptor, type I/II extracellular region						H+/oligopeptide symporter	Amino acid transport and metabolism
11807	1444322	YES	10.49	8.2	2.29	0.0327456	11.05	8.32	2.73	1.00074e-08	0	0	0	0	0	0	proteolysis | cysteine-type peptidase activity | serine-type peptidase activity	Peptidase S28	3.4.-.-	Acting on peptide bonds (peptide hydrolases),		Biotin metabolism	Metabolism of Cofactors and Vitamins	Hydrolytic enzymes of the alpha/beta hydrolase fold | Hydrolytic enzymes of the alpha/beta hydrolase fold	Posttranslational modification, protein turnover, chaperones
11572	399957	NO	11.88	7.75	4.12	2.25698e-30	12.57	8.81	3.76	8.70562e-18	0	0	4	0	8	0	binding | catalytic activity | metabolic process | oxidoreductase activity | 3-oxoacyl-[acyl-carrier-protein] reductase activity	NAD(P)-binding | Glucose/ribitol dehydrogenase | Short-chain dehydrogenase/reductase SDR	1.1.1.100	3-oxoacyl-[acyl-carrier protein] reductase,	(3R)-3-hydroxyacyl-[acyl-carrier protein] + NADP(+) = 3-oxoacyl- [acyl-carrier protein] + NADPH,	Fatty acid biosynthesis (path 1)	Lipid Metabolism	Mitochondrial/plastidial beta-ketoacyl-ACP reductase	Lipid transport and metabolism
11805	1440560	YES	10.52	7.94	2.58	0.000184365	11.6	7.84	3.76	5.1085e-27	0	0	5	0	3	0		Pectin lyase fold/virulence factor
11804	1437617	YES	11.39	8.38	3.01	4.37832e-15	10.82	8.15	2.67	4.86226e-06	0	0	0	0	0	0	carbohydrate metabolic process | polygalacturonase activity | galacturan 1,4-alpha-galacturonidase activity	Pectin lyase fold/virulence factor | Glycoside hydrolase, family 28	3.2.1.67	Galacturan 1,4-alpha-galacturonidase,	{(1,4)-alpha-D-galacturonide}(N) + H(2)O = {(1,4)-alpha-D- galacturonide}(N-1) + D-galacturonate,	Starch and sucrose metabolism	Metabolism of Complex Carbohydrates
11803	1404168	YES	10.82	8.07	2.76	2.50879e-07	11.19	8.45	2.74	9.68817e-06	0	0	0	0	0	0	carbohydrate metabolic process | polygalacturonase activity	Pectin lyase fold/virulence factor | Glycoside hydrolase, family 28
11802	1400117	YES	10.76	8.15	2.61	9.18244e-06	11.27	8.14	3.13	7.00463e-14	8	0	3	3	8	14	lipid metabolic process | hydrolase activity, acting on ester bonds	Lipase, GDSL | Esterase, SGNH hydrolase-type
11801	1394642	YES	11.27	8.24	3.02	8.52236e-19	10.98	8.09	2.89	4.42443e-12	0	0	0	0	0	0	hydrolase activity, hydrolyzing O-glycosyl compounds | carbohydrate metabolic process | alpha-galactosidase activity	Glycoside hydrolase, catalytic core | Glycoside hydrolase, clan GH-D | Glycoside hydrolase, family 27	3.2.1.22	Alpha-galactosidase,	Melibiose + H(2)O = galactose + glucose,	Galactose metabolism	Carbohydrate Metabolism	Alpha-D-galactosidase (melibiase)	Carbohydrate transport and metabolism
11800	1384687	YES	11.15	7.27	3.88	7.86039e-32	11.44	7.67	3.77	6.61934e-24	0	0	0	0	0	0	catalytic activity | alpha,alpha-trehalase activity | trehalose metabolic process	Six-hairpin glycosidase-like | Glycoside hydrolase, family 37
11799	1587712	NO	11.64	5.29	6.35	1.41941e-12	9.72	9.2	0.52	1	0	0	0	0	0	0
11798	1505131	YES	10.49	5.99	4.51	0.0452117	11.19	9.52	1.67	1	0	0	0	0	0	0
11797	1501998	NO	9.28	4.62	4.66	1.12972e-31	11.96	8.47	3.49	1.78911e-14	0	0	0	0	24	0	phospholipid biosynthetic process | phosphatidylserine decarboxylase activity	Phosphatidylserine decarboxylase-related						Phosphatidylserine decarboxylase	Lipid transport and metabolism
11796	1480798	NO	9.8	6.06	3.73	3.73747e-06	10.41	8.94	1.47	1	0	0	0	0	0	0
11795	1551020	YES	8.54	6.92	1.62	1	11.11	9.89	1.22	1	4	0	7	0	14	13		Bicupin, oxalate decarboxylase/oxidase | Cupin, RmlC-type | Cupin 2, conserved barrel						Chitinase	Cell wall/membrane/envelope biogenesis
11794	1529568	NO	8.64	7.99	0.65	1	11.42	8.53	2.89	4.77809e-10	0	0	0	0	0	0	binding | catalytic activity | metabolic process | oxidoreductase activity	NAD(P)-binding | Oxidoreductase, N-terminal | Oxidoreductase putative, C-terminal
11793	1489291	NO	8.97	8.35	0.62	1	11.18	8.67	2.51	0.00770919	0	0	0	0	15	0
11792	1469645	NO	9.17	8.05	1.12	1	11.18	8.63	2.55	0.0509948	0	0	0	0	0	0
11791	1437513	NO	8.01	7.55	0.46	1	11.79	7.26	4.53	7.7375e-12	0	0	0	0	0	0								Chitinase	Carbohydrate transport and metabolism
11790	563286	NO	9.32	7.65	1.68	1	10.41	7.19	3.22	1.08369e-08	0	0	0	0	0	0	hydrolase activity	Beta-lactamase-like
11789	1446611	NO	9.15	8	1.14	1	10.37	7.07	3.3	4.03377e-15	0	0	0	0	0	0	catalytic activity | metabolic process	Isochorismatase hydrolase
11788	1442428	NO	9.48	7.94	1.54	1	10.56	7.67	2.89	2.70647e-10	0	0	0	0	0	0	glycolysis | fructose-bisphosphate aldolase activity	Fructose-bisphosphate aldolase, class-I	4.1.2.13	Fructose-bisphosphate aldolase,	D-fructose 1,6-bisphosphate = glycerone phosphate + D-glyceraldehyde 3- phosphate,	Pentose phosphate pathway	Carbohydrate Metabolism	Fructose-biphosphate aldolase	Carbohydrate transport and metabolism
11787	1442268	YES	10.27	8.27	2	1	11.21	7.4	3.82	5.09649e-18	0	0	0	0	0	0	lipid metabolic process | hydrolase activity, acting on ester bonds	Lipase, GDSL | Esterase, SGNH hydrolase-type
11786	1436167	YES	9.54	7.63	1.91	1	11.16	6.67	4.49	2.96483e-41	0	0	0	0	0	0	extracellular region | hydrolase activity, hydrolyzing O-glycosyl compounds | carbohydrate metabolic process | cellulose binding	Cellulose-binding region, fungal | Glycoside hydrolase, family 61
11785	1387380	YES	10.06	8.52	1.53	1	10.79	7.38	3.41	4.12124e-11	2	0	11	0	18	19	carboxylesterase activity	Carboxylesterase, type B	3.1.1.1	Carboxylesterase,	A carboxylic ester + H(2)O = an alcohol + a carboxylic anion,			Acetylcholinesterase/Butyrylcholinesterase	Signal transduction mechanisms
11784	1381480	YES	9.65	8	1.65	1	10.58	7.57	3.01	2.90163e-05	0	0	4	0	4	0	hydrolase activity, hydrolyzing O-glycosyl compounds | carbohydrate metabolic process | alpha-galactosidase activity	Glycoside hydrolase, catalytic core | Glycoside hydrolase, clan GH-D | Glycoside hydrolase, family 27	3.2.1.22	Alpha-galactosidase,	Melibiose + H(2)O = galactose + glucose,	Galactose metabolism	Carbohydrate Metabolism	Alpha-D-galactosidase (melibiase)	Carbohydrate transport and metabolism
11783	934362	NO	9.53	8.27	1.26	1	9.97	7.82	2.15	1	0	0	0	0	0	0		Oligopeptide transporter OPT superfamily						Sexual differentiation process protein ISP4	Signal transduction mechanisms
11782	511367	YES	10.06	8.7	1.36	1	10.05	7.74	2.3	0.478557	0	0	0	0	0	0		Glycoside hydrolase, family 61
11781	1592524	YES	9.35	8.65	0.7	1	9.62	7.24	2.37	0.0918075	0	0	0	0	0	0
11780	1512820	NO	9.9	8.92	0.98	1	9.52	7.34	2.18	1	0	0	0	0	0	0	zinc ion binding | 1-phosphatidylinositol-4-phosphate 5-kinase activity	Zinc finger, FYVE-type | Zinc finger, FYVE-related | Zinc finger, FYVE/PHD-type	2.7.1.68	1-phosphatidylinositol-4-phosphate kinase,	ATP + 1-phosphatidyl-1D-myo-inositol 4-monophosphate = ADP + 1-phosphatidyl-1D-myo-inositol 4,5-bisphosphate,	Inositol phosphate metabolism	Metabolism of Complex Lipids	FYVE finger containing protein	General function prediction only
11779	1504949	NO	9.82	8.2	1.62	1	9.6	8	1.6	1	0	0	0	0	0	0
11778	1482414	NO	9.73	8.84	0.89	1	9.86	8.02	1.83	1	0	0	0	0	0	0	hydrolase activity, hydrolyzing O-glycosyl compounds | carbohydrate metabolic process | beta-glucosidase activity	Glycoside hydrolase, family 3, N-terminal | Glycoside hydrolase, family 3, C-terminal | Glycoside hydrolase, catalytic core | PA14	3.2.1.21	Beta-glucosidase,	Hydrolysis of terminal, non-reducing beta-D-glucose residues with release of beta-D-glucose,	Starch and sucrose metabolism	Metabolism of Complex Carbohydrates
11806	1443624	NO	11.27	8.52	2.75	5.98823e-10	11.6	8.35	3.25	3.76444e-20	0	0	0	0	0	0	iron ion binding | monooxygenase activity | electron transport | heme binding | fluorene oxygenase activity | mono-butyltin dioxygenase activity | limonene 8-monooxygenase activity | tri-n-butyltin dioxygenase activity | di-n-butyltin dioxygenase activity | methylsilanetriol hydroxylase activity | methyl tertiary butyl ether 3-monooxygenase activity | 4-nitrocatechol 4-monooxygenase activity | 4-…	Cytochrome P450 | Cytochrome P450, E-class, group I	1.14.-.-	Acting on paired donors, with incorporation or reduction of		gamma-Hexachlorocyclohexane degradation	Biodegradation of Xenobiotics	Cytochrome P450 CYP4/CYP19/CYP26 subfamilies | Cytochrome P450 CYP4/CYP19/CYP26 subfamilies	Lipid transport and metabolism
11776	1450207	NO	9.22	8.71	0.51	1	9.68	7.9	1.78	1	0	0	0	0	0	0
11775	1441049	NO	9.87	8.59	1.27	1	9.61	7.54	2.07	1	0	0	0	0	0	0	integral to membrane | protein prenyltransferase activity | prenyltransferase activity | protein geranylgeranyltransferase activity | 4-hydroxybenzoate octaprenyltransferase activity | protoheme IX farnesyltransferase activity | Sep-tRNA:Cys-tRNA synthase activity | (S)-2,3-di-O-geranylgeranylglyceryl phosphate synthase activity | 1,4-dihydroxy-2-naphthoate octaprenyltransferase activity	UbiA prenyltransferase						Para-hydroxybenzoate-polyprenyl transferase	Coenzyme transport and metabolism
11774	1396076	NO	10.25	8.91	1.34	1	9.76	8.05	1.71	1	0	0	0	0	0	0		MFS general substrate transporter | Major facilitator superfamily MFS-1						Permease of the major facilitator superfamily	Carbohydrate transport and metabolism
11773	1381135	YES	9.56	8.53	1.03	1	9.55	7.5	2.05	1	5	0	11	3	9	13
11538	1406307	YES	10.21	6.83	3.39	1.84944e-18	11.06	8.03	3.03	1.35107e-09	0	0	0	0	8	0	hydrolase activity | sphingomyelin phosphodiesterase activity	Metallophosphoesterase	3.1.4.12	Sphingomyelin phosphodiesterase,	Sphingomyelin + H(2)O = N-acylsphingosine + choline phosphate,	Sphingophospholipid biosynthesis	Metabolism of Complex Lipids	Acid sphingomyelinase and PHM5 phosphate metabolism protein	Lipid transport and metabolism
11771	381655	NO	9.7	7.67	2.03	1	10.69	8.37	2.32	0.603621	0	0	0	0	0	0	transport | membrane | transporter activity | integral to membrane | sugar:hydrogen symporter activity | carbohydrate transport | L-arabinose isomerase activity	MFS general substrate transporter | Major facilitator superfamily | Sugar transporter, conserved site | General substrate transporter | Sugar transporter	5.3.1.4	L-arabinose isomerase,	L-arabinose = L-ribulose,	Pentose and glucuronate interconversions	Carbohydrate Metabolism	Predicted transporter (major facilitator superfamily)	General function prediction only
11770	238279	YES	10.42	7.82	2.6	0.00104552	10.26	7.83	2.43	0.0934923	0	0	2	0	3	6
11769	1577187	NO	10	8.03	1.97	1	9.84	8.04	1.79	1	0	0	0	0	0	0	catalytic activity | metabolic process	Isochorismatase hydrolase
11768	1505564	NO	9.8	7.59	2.21	1	10.55	8.22	2.33	0.543136	0	0	0	0	0	0								Calcium-responsive transcription coactivator	Transcription
11767	1484701	NO	9.93	8.2	1.74	1	10.23	7.78	2.45	0.00125939	0	0	0	0	0	0		Pectate lyase/Amb allergen | Pectin lyase fold/virulence factor
11766	1484500	YES	10.12	7.59	2.53	4.19885e-05	10.68	7.68	3	1.18146e-12	0	0	0	0	0	0		Pectate lyase/Amb allergen | Pectin lyase fold/virulence factor
11765	1471020	NO	9.75	7.81	1.94	1	10.4	8.09	2.31	0.0390635	0	0	0	0	0	0	aromatic compound metabolic process | metabolic process | monooxygenase activity | electron transport | oxidoreductase activity | phenol 2-monooxygenase activity	FAD-dependent pyridine nucleotide-disulphide oxidoreductase | Aromatic-ring hydroxylase | Monooxygenase, FAD-binding | Thioredoxin-like fold | Pyridine nucleotide-disulphide oxidoreductase, class I | Phenol hydroxylase, C-terminal dimerisation	1.14.13.7	Phenol 2-monooxygenase,	Phenol + NADPH + O(2) = catechol + NADP(+) + H(2)O,	gamma-Hexachlorocyclohexane degradation	Biodegradation of Xenobiotics	Monooxygenase involved in coenzyme Q (ubiquinone) biosynthesis | Monooxygenase involved in coenzyme Q (ubiquinone) biosynthesis	Coenzyme transport and metabolism
11764	1457477	NO	10.18	7.8	2.38	0.00104552	9.99	8	1.99	1	0	0	0	0	0	0								Uncharacterized conserved protein	Function unknown
11763	1446455	NO	9.69	7.55	2.14	0.814493	10.29	8.01	2.27	0.294131	0	0	0	0	0	0
11762	1441035	NO	10.07	8.02	2.05	1	9.96	7.81	2.15	1	0	0	0	0	0	0	hydrolase activity | hydrolase activity, acting on carbon-nitrogen (but not peptide) bonds | nitrogen compound metabolic process | nickel ion binding | urease activity | urea metabolic process	Metal-dependent hydrolase, composite | Amidohydrolase 1 | Urease, gamma subunit region | Urease, beta subunit | Urease, alpha subunit | Urease alpha-subunit, N-terminal | Urease, gamma/beta/alpha type	3.5.1.5	Urease,	Urea + H(2)O = CO(2) + 2 NH(3),	Purine metabolism	Nucleotide Metabolism	Dihydroorotase and related enzymes	Nucleotide transport and metabolism
11761	1429520	YES	9.78	7.92	1.86	1	10.18	7.88	2.3	0.0428791	0	0	0	0	0	7	ATP binding | nucleotide binding | translation | cytoplasm | aminoacyl-tRNA ligase activity | tRNA aminoacylation for protein translation | motor activity | structural molecule activity | ciliary or flagellar motility | flagellin-based flagellum	Glycoside hydrolase, catalytic core | Aminoacyl-tRNA synthetase, class I, conserved site | Flagellar basal body rod protein
11760	1397866	NO	9.99	7.94	2.06	1	9.93	8.08	1.85	1	0	0	0	0	0	0	membrane | nucleobase transmembrane transporter activity | nucleobase, nucleoside, nucleotide and nucleic acid transport	Permease for cytosine/purines, uracil, thiamine, allantoin
11759	1390320	YES	9.9	7.78	2.13	1	10.74	7.94	2.8	7.95497e-08	0	0	4	0	4	0	hydrolase activity, hydrolyzing O-glycosyl compounds | carbohydrate metabolic process	Glycoside hydrolase, family 43 | Glycoside hydrolase, family 43, endo-1, 5-alpha-L-arabinosidase
11758	1373783	NO	10.23	7.41	2.82	5.64137e-10	10.7	8.09	2.61	3.89933e-05	0	0	4	0	5	0		Endoribonuclease L-PSP | Endoribonuclease L-PSP/chorismate mutase-like | YjgF-like protein						Putative translation initiation inhibitor UK114/IBM1	Translation, ribosomal structure and biogenesis
11757	1253041	NO	10.48	7.69	2.78	3.40942e-11	10.15	8.02	2.13	1	0	0	0	0	0	0	iron ion binding | monooxygenase activity | electron transport | heme binding | trans-cinnamate 4-monooxygenase activity	Cytochrome P450 | Cytochrome P450, E-class, group I	1.14.13.11	Trans-cinnamate 4-monooxygenase,	Trans-cinnamate + NADPH + O(2) = 4-hydroxycinnamate + NADP(+) + H(2)O,	Flavonoids, stilbene and lignin biosynthesis	Biosynthesis of Secondary Metabolites	Cytochrome P450 CYP2 subfamily	Secondary metabolites biosynthesis, transport and catabolism
11756	724074	YES	10.36	8.11	2.25	1	10.77	8.5	2.27	1	13	0	11	8	6	14	catalytic activity | carbohydrate metabolic process | glucan 1,4-alpha-glucosidase activity | carbohydrate binding | polysaccharide catabolic process | polysaccharide metabolic process	Six-hairpin glycosidase-like | Glycoside hydrolase, carbohydrate-binding | Glycoside hydrolase, family 15 | Glycoside hydrolase 15-related | Glucan 1,4-alpha-glucosidase, starch-binding | Carbohydrate-binding-like fold	3.2.1.3	Glucan 1,4-alpha-glucosidase,	Hydrolysis of terminal 1,4-linked alpha-D-glucose residues successively from non-reducing ends of the chains with release of beta-D-glucose,	Starch and sucrose metabolism	Metabolism of Complex Carbohydrates	Predicted starch-binding protein	General function prediction only
11755	189519	NO	10.76	7.88	2.88	2.88035e-07	10.79	8.74	2.05	1	0	0	0	0	0	0
11754	1509759	NO	11.61	7.15	4.46	1.42224e-49	10.95	8.82	2.14	1	0	0	0	0	0	0	actin cytoskeleton | actin binding | cytoskeleton organization and biogenesis	Profilin/allergen
11753	1503022	NO	10.49	7.91	2.58	0.192023	10.13	8.78	1.35	1	0	0	0	0	0	0	binding | catalytic activity | metabolic process | oxidoreductase activity	NAD(P)-binding | Oxidoreductase, N-terminal | Immunoglobulin-like						Dimeric dihydrodiol dehydrogenase | Dimeric dihydrodiol dehydrogenase	Carbohydrate transport and metabolism
11752	1498568	NO	11.49	7.63	3.86	5.68524e-35	10.38	9.45	0.93	1	0	0	0	0	0	0
11751	1476771	YES	10.96	7.99	2.97	1.76955e-09	10.65	8.54	2.11	1	0	0	8	0	18	8	catalytic activity | extracellular region | carbohydrate metabolic process | carbohydrate binding | lyase activity	Glycoside hydrolase-type carbohydrate-binding | Polysaccharide lyase family 8, central | Chondroitin AC/alginate lyase | Polysaccharide lyase family 8-like, C-terminal						beta-1,6-N-acetylglucosaminyltransferase, contains WSC domain | beta-1,6-N-acetylglucosaminyltransferase, contains WSC domain	Carbohydrate transport and metabolism
11750	1466796	NO	11.24	7.49	3.75	3.03112e-33	11.08	8.64	2.44	0.0167864	0	0	0	0	0	0	carboxylesterase activity	Carboxylesterase, type B	3.1.1.1	Carboxylesterase,	A carboxylic ester + H(2)O = an alcohol + a carboxylic anion,			Carboxylesterase and related proteins	General function prediction only
11749	1456341	NO	10.87	8.24	2.63	2.07988e-05	10.15	8.91	1.24	1	0	0	0	0	0	0		NLI interacting factor						TFIIF-interacting CTD phosphatase, including NLI-interacting factor (involved in RNA polymerase II regulation)	Transcription
11748	1445552	YES	10.67	8.2	2.46	0.000491628	10.81	8.86	1.95	1	0	0	0	0	0	0	hydrolase activity, hydrolyzing O-glycosyl compounds | carbohydrate metabolic process	Glycoside hydrolase, family 43
11747	1444779	NO	10.89	8.03	2.86	0.197781	10.24	8.55	1.69	1	0	0	0	0	0	0								Nuclear receptor coregulator SMRT/SMRTER, contains Myb-like domains	Transcription
11746	1444207	NO	10.58	7.54	3.04	1.93608e-10	10.28	8.62	1.66	1	0	0	0	0	0	0
11745	1442847	NO	11.03	7.77	3.25	2.5913e-08	10.51	8.69	1.82	1	0	0	0	0	0	0	O-methyltransferase activity	O-methyltransferase, family 2						Hydroxyindole-O-methyltransferase and related SAM-dependent methyltransferases	General function prediction only
11744	1411905	NO	10.46	8.21	2.25	0.0259991	10.82	8.35	2.47	5.32454e-05	0	0	0	0	0	0	transport | membrane | transporter activity | integral to membrane | sugar:hydrogen symporter activity | carbohydrate transport | L-arabinose isomerase activity	MFS general substrate transporter | Major facilitator superfamily | General substrate transporter | Sugar transporter	5.3.1.4	L-arabinose isomerase,	L-arabinose = L-ribulose,	Pentose and glucuronate interconversions	Carbohydrate Metabolism	Predicted transporter (major facilitator superfamily)	General function prediction only
11743	1394471	YES	10.59	8.03	2.56	0.0073528	10.24	8.93	1.31	1	0	0	0	0	0	6		SMP-30/Gluconolaconase/LRE-like region
11742	1509760	NO	11.34	8.68	2.66	2.57135e-11	11.04	9.65	1.39	1	0	0	0	0	0	0	iron ion binding | monooxygenase activity | electron transport | heme binding	Cytochrome P450						Cytochrome P450 CYP2 subfamily	Secondary metabolites biosynthesis, transport and catabolism
11741	1503806	YES	10.56	8.71	1.84	1	10.19	9.52	0.66	1	0	0	0	0	0	0								beta-1,6-N-acetylglucosaminyltransferase, contains WSC domain | beta-1,6-N-acetylglucosaminyltransferase, contains WSC domain	Carbohydrate transport and metabolism
11740	1482730	NO	10.55	8.43	2.12	1	10.52	9.82	0.71	1	0	0	0	0	0	0	G-protein coupled receptor protein signaling pathway | signal transduction | signal transducer activity | guanyl nucleotide binding	G protein alpha subunit, helical insertion | Guanine nucleotide binding protein (G-protein), alpha subunit						G-protein alpha subunit (small G protein superfamily) | G-protein alpha subunit (small G protein superfamily)	Signal transduction mechanisms
11739	1451965	NO	10.69	8.17	2.53	2.32596e-05	10.55	9.74	0.82	1	0	0	0	0	0	0	catalytic activity | pyridoxal phosphate binding | molybdenum ion binding	Molybdenum cofactor sulphurase, C-terminal | MOSC, N-terminal beta barrel | Pyruvate kinase, beta-barrel-like						Uncharacterized Fe-S protein	General function prediction only
11738	1449972	NO	10.81	8.88	1.93	1	10.72	9.64	1.08	1	0	0	0	0	0	0	transport | transporter activity | integral to membrane	MFS general substrate transporter | Major facilitator superfamily MFS-1 | Major facilitator superfamily						Monocarboxylate transporter	Carbohydrate transport and metabolism
11737	1446401	NO	10.42	8.64	1.78	1	10.27	9.69	0.58	1	0	0	0	0	0	0	GTP binding | GTPase activity | dynamin GTPase activity	Dynamin, GTPase region | Dynamin GTPase effector						Vacuolar sorting protein VPS1, dynamin, and related proteins | Vacuolar sorting protein VPS1, dynamin, and related proteins	General function prediction only
11736	1436893	NO	11.13	8.32	2.81	1.5724e-08	10.62	9.96	0.65	1	0	0	0	0	0	0	zinc ion binding | nucleus | transcription factor activity | regulation of transcription, DNA-dependent | sequence-specific DNA binding	Zinc finger, GATA-type						GATA-4/5/6 transcription factors	Transcription
11735	561529	NO	9.95	8.93	1.01	1	10.65	8.7	1.95	1	0	0	0	0	2	0	hydrolase activity	Dienelactone hydrolase						Predicted hydrolase related to dienelactone hydrolase	General function prediction only
11734	524574	NO	9.55	8.39	1.16	1	11.06	9.12	1.94	1	0	0	9	0	17	0	oxidoreductase activity | FMN binding | 12-oxophytodienoate reductase activity	NADH:flavin oxidoreductase/NADH oxidase, N-terminal	1.3.1.42	12-oxophytodienoate reductase,	8-[(1R,2R)-3-oxo-2-{(Z)-pent-2-enyl}cyclopentyl]octanoate + NADP(+) = (15Z)-12-oxophyto-10,15-dienoate + NADPH,			NADH:flavin oxidoreductase/12-oxophytodienoate reductase | NADH:flavin oxidoreductase/12-oxophytodienoate reductase	General function prediction only
11733	1594368	NO	9.94	8.62	1.32	1	10.39	9.12	1.28	1	0	0	0	0	0	0								Uncharacterized conserved protein	Function unknown
11732	1592166	NO	9.96	9.02	0.93	1	10.43	9.12	1.31	1	0	0	0	0	0	0	intracellular | zinc ion binding | nucleus | nucleic acid binding | transcription factor activity | regulation of transcription, DNA-dependent | metabolic process | acyltransferase activity	Zinc finger, C2H2-type | Zinc finger, C2H2-like | Fungal transcriptional regulatory protein, N-terminal | Catalytic domain of components of various dehydrogenase complexes						Dihydrolipoamide acetyltransferase	Energy production and conversion
11731	1587644	NO	10.07	8.66	1.41	1	10.39	8.9	1.49	1	0	0	0	0	0	0	hydrolase activity | metabolic process	Alpha/beta hydrolase fold-3						Arylacetamide deacetylase	Defense mechanisms
11730	1552899	NO	10.28	8.98	1.31	1	10.5	9.13	1.37	1	0	0	0	0	2	0	binding | nucleic acid binding | catalytic activity | metabolic process | methyltransferase activity | cellular metabolic process | methylation | coenzyme binding | cinnamyl-alcohol dehydrogenase activity	NAD(P)-binding | N-6 adenine-specific DNA methylase, conserved site | NAD-dependent epimerase/dehydratase	1.1.1.195	Cinnamyl-alcohol dehydrogenase,	Cinnamyl alcohol + NADP(+) = cinnamaldehyde + NADPH,	Flavonoids, stilbene and lignin biosynthesis	Biosynthesis of Secondary Metabolites	Flavonol reductase/cinnamoyl-CoA reductase	Defense mechanisms
11729	1509675	YES	10.4	8.92	1.48	1	10.26	8.88	1.39	1	0	0	0	0	0	0	metal ion binding | hydrolase activity, acting on carbon-nitrogen (but not peptide) bonds, in linear amidines | arginase activity | arginine catabolic process | agmatinase activity	Ureohydrolase | Arginase	3.5.3.11	Agmatinase,	Agmatine + H(2)O = putrescine + urea,	Arginine and proline metabolism	Amino Acid Metabolism	Arginase family protein	Amino acid transport and metabolism
10875	923538	YES	9.31	5.67	3.63	3.52765e-23	9.23	6.36	2.87	1.18206e-07	0	0	0	0	0	0	catalytic activity | lipid metabolic process | triacylglycerol lipase activity	Lipase, class 3 | Lipase, active site						Predicted lipase	Lipid transport and metabolism
11727	1501461	NO	10.42	8.67	1.75	1	10.8	9.07	1.73	1	0	0	0	0	0	0	hydrolase activity, hydrolyzing O-glycosyl compounds | carbohydrate metabolic process | alpha-glucosidase activity	Glycoside hydrolase, catalytic core | Glycoside hydrolase, family 31	3.2.1.20	Alpha-glucosidase,	Hydrolysis of terminal, non-reducing 1,4-linked D-glucose residues with release of D-glucose,	Galactose metabolism	Carbohydrate Metabolism	Glucosidase II catalytic (alpha) subunit and related enzymes, glycosyl hydrolase family 31 | Glucosidase II catalytic (alpha) subunit and related enzymes, glycosyl hydrolase family 31 | Glucosidase II catalytic (alpha) subunit and related enzymes, glycosyl hydrolase family 31	Carbohydrate transport and metabolism
11726	1453436	NO	10.05	9.11	0.95	1	10.51	9.11	1.4	1	0	0	0	0	0	0	membrane | nucleobase transmembrane transporter activity | nucleobase, nucleoside, nucleotide and nucleic acid transport	Permease for cytosine/purines, uracil, thiamine, allantoin | Nucleobase cation symporter-1, NCS1						Uridine permease/thiamine transporter/allantoin transport | Uridine permease/thiamine transporter/allantoin transport	Nucleotide transport and metabolism
11725	1452876	NO	9.87	8.91	0.96	1	10.46	8.67	1.79	1	0	0	0	0	6	0	binding | catalytic activity | metabolic process | alcohol dehydrogenase activity | alcohol dehydrogenase activity, metal ion-independent | alcohol dehydrogenase activity, zinc-dependent | alcohol dehydrogenase activity, iron-dependent	NAD(P)-binding | Alcohol dehydrogenase, zinc-binding | Alcohol dehydrogenase GroES-like | GroES-like	1.1.1.1	Alcohol dehydrogenase,	An alcohol + NAD(+) = an aldehyde or ketone + NADH,	Bile acid biosynthesis	Lipid Metabolism	Sorbitol dehydrogenase	Secondary metabolites biosynthesis, transport and catabolism
11724	1442780	NO	10.01	8.53	1.48	1	11.04	8.75	2.28	0.513058	0	0	3	0	10	0	hydrolase activity	Dienelactone hydrolase						Predicted hydrolase related to dienelactone hydrolase	General function prediction only
11723	1427035	NO	10.07	8.75	1.32	1	10.22	8.81	1.41	1	0	0	0	0	0	0
11722	993528	NO	10.95	9.54	1.4	1	11	8.85	2.15	1	0	0	0	0	0	0
11721	1530803	NO	10.52	8.89	1.63	1	10.67	9.08	1.59	1	0	0	0	0	0	0		von Willebrand factor, type A
11720	1522391	NO	10.85	9.35	1.49	1	10.79	9.09	1.7	1	0	0	15	0	17	0	carbohydrate metabolic process | glycerol-3-phosphate metabolic process | glycerol kinase activity	Carbohydrate kinase, FGGY | Glycerol kinase	2.7.1.30	Glycerol kinase,	ATP + glycerol = ADP + glycerol 3-phosphate,	Glycerolipid metabolism	Metabolism of Complex Lipids	Ribulose kinase and related carbohydrate kinases	Carbohydrate transport and metabolism
11719	1506772	YES	11.04	9.03	2.01	1	10.21	8.71	1.5	1	3	0	4	0	9	20	catalytic activity	Six-hairpin glycosidase-like | Region of unknown function DUF1793
11718	1457792	NO	10.47	9.16	1.31	1	10.75	8.93	1.81	1	0	0	0	0	0	0	transport | membrane | integral to membrane | amino acid transport | amino acid transmembrane transporter activity	Amino acid permease-associated region | Amino acid/polyamine transporter I | Amino acid permease, conserved site						Amino acid transporters	Amino acid transport and metabolism
11717	1452004	NO	10.96	9	1.96	1	11.27	9.15	2.12	1	0	0	0	0	0	0	cyclohexanone monooxygenase activity		1.14.13.22	Cyclohexanone monooxygenase,	Cyclohexanone + NADPH + O(2) = 6-hexanolide + NADP(+) + H(2)O,	Caprolactam degradation	Biodegradation of Xenobiotics	Flavin-containing monooxygenase	Secondary metabolites biosynthesis, transport and catabolism
11716	1450994	YES	10.91	9	1.91	1	10.54	8.71	1.83	1	0	0	18	0	17	0	acetylcholinesterase activity	Carboxylesterase, type B	3.1.1.7	Acetylcholinesterase,	Acetylcholine + H(2)O = choline + acetate,	Glycerolipid metabolism	Metabolism of Complex Lipids	Acetylcholinesterase/Butyrylcholinesterase	Signal transduction mechanisms
11715	1449286	YES	11.01	9.19	1.82	1	11.1	8.96	2.14	1	3	0	6	3	5	12	proteolysis | cysteine-type peptidase activity | serine-type peptidase activity	Peptidase S28	3.4.-.-	Acting on peptide bonds (peptide hydrolases),		Biotin metabolism	Metabolism of Cofactors and Vitamins	Hydrolytic enzymes of the alpha/beta hydrolase fold | Hydrolytic enzymes of the alpha/beta hydrolase fold	Posttranslational modification, protein turnover, chaperones
11714	1449254	NO	11.02	9.33	1.69	1	10.98	8.98	2	1	0	0	0	0	0	0
11713	1447742	NO	10.99	9.15	1.84	1	10.34	9.08	1.26	1	0	0	0	0	0	0	carbohydrate metabolic process | glucosamine-6-phosphate deaminase activity | N-acetylglucosamine metabolic process	Glucosamine/galactosamine-6-phosphate isomerase | Glucosamine-6-phosphate isomerase	3.5.99.6	Glucosamine-6-phosphate deaminase,	D-glucosamine 6-phosphate + H(2)O = D-fructose 6-phosphate + NH(3),	Aminosugars metabolism	Metabolism of Complex Carbohydrates	Glucosamine-6-phosphate isomerase	Carbohydrate transport and metabolism
11712	1444773	NO	11.13	8.48	2.64	0.000168794	10.96	8.77	2.18	1	6	0	10	6	24	14	carbon-nitrogen ligase activity, with glutamine as amido-N-donor | cobyrinate a,c-diamide synthase activity | glutaminyl-tRNA synthase (glutamine-hydrolyzing) activity	Amidase signature enzyme	6.3.5.-	Carbon--nitrogen ligases with glutamine as amido-N-donor,		Glutamate metabolism	Amino Acid Metabolism	Amidases	Translation, ribosomal structure and biogenesis
11711	1443625	NO	10.95	9.3	1.64	1	10.49	9.01	1.48	1	0	0	0	0	0	0	binding | transport | transporter activity	Lipocalin
11710	1440755	NO	10.66	9.08	1.58	1	10.93	9.06	1.87	1	0	0	0	0	0	0	membrane | calcium ion binding	Like-Sm ribonucleoprotein-related, core | Calcium-binding EF-hand | Mechanosensitive ion channel MscS						Predicted mechanosensitive ion channel	Cell wall/membrane/envelope biogenesis
11709	1437699	YES	10.78	8.95	1.83	1	10.43	8.77	1.66	1	0	0	2	0	4	0	metal ion binding | hydrolase activity, acting on carbon-nitrogen (but not peptide) bonds, in linear amidines | arginase activity | arginine catabolic process | agmatinase activity	Ureohydrolase | Arginase	3.5.3.11	Agmatinase,	Agmatine + H(2)O = putrescine + urea,	Arginine and proline metabolism	Amino Acid Metabolism	Arginase family protein	Amino acid transport and metabolism
11708	1399385	NO	10.81	9.49	1.32	1	10.92	8.88	2.04	1	0	0	0	0	0	0
11707	1394288	NO	10.73	8.74	1.99	1	10.87	9.12	1.75	1	0	0	0	0	0	0		MFS general substrate transporter | Major facilitator superfamily MFS-1						Synaptic vesicle transporter SVOP and related transporters (major facilitator superfamily)	General function prediction only
11706	1391231	NO	10.89	8.73	2.16	1	11.15	8.98	2.17	1	0	0	0	0	3	0	binding | intracellular | catalytic activity | metabolic process | structural constituent of ribosome | ribosome | translation | NADPH:quinone reductase activity	NAD(P)-binding | Alcohol dehydrogenase, zinc-binding | Alcohol dehydrogenase GroES-like | GroES-like | Ribosomal protein S2	1.6.5.5	NADPH:quinone reductase,	NADPH + quinone = NADP(+) + semiquinone,			Zinc-binding oxidoreductase | Zinc-binding oxidoreductase	Energy production and conversion
11705	656987	YES	11.56	9.79	1.77	1	10.78	8.21	2.57	0.0022703	0	0	0	0	0	0	proteolysis | cysteine-type endopeptidase activity	Peptidase, cysteine peptidase active site
11704	1507247	NO	10.92	9.2	1.72	1	11.68	7.53	4.16	2.65906e-63	0	0	0	0	0	0	transport | membrane | integral to membrane | amino acid transport | amino acid transmembrane transporter activity	Amino acid permease-associated region | Amino acid/polyamine transporter I | Amino acid permease, conserved site						Amino acid transporters	Amino acid transport and metabolism
11703	1495034	NO	10.93	8.64	2.28	0.0165167	10.49	8.09	2.4	0.00173318	0	0	0	0	0	0	translation | aminoacyl-tRNA hydrolase activity	Peptidyl-tRNA hydrolase						von Willebrand factor and related coagulation proteins | von Willebrand factor and related coagulation proteins	Extracellular structures
11702	1482066	NO	10.84	9.06	1.78	1	11.08	8.3	2.78	3.10041e-08	0	0	0	0	0	0	transport | membrane | transporter activity | integral to membrane | sugar:hydrogen symporter activity | carbohydrate transport | L-arabinose isomerase activity	MFS general substrate transporter | Major facilitator superfamily | General substrate transporter | Sugar transporter	5.3.1.4	L-arabinose isomerase,	L-arabinose = L-ribulose,	Pentose and glucuronate interconversions	Carbohydrate Metabolism	Predicted transporter (major facilitator superfamily)	General function prediction only
11701	1450943	NO	11.25	8.92	2.33	0.292414	11.11	7.92	3.2	1.28086e-09	0	0	0	0	2	0	binding | catalytic activity | metabolic process | electron transport | oxidoreductase activity | inositol 2-dehydrogenase activity	NAD(P)-binding | Oxidoreductase, N-terminal | Oxidoreductase, C-terminal	1.1.1.18	Myo-inositol 2-dehydrogenase,	Myo-inositol + NAD(+) = 2,4,6/3,5-pentahydroxycyclohexanone + NADH,	Inositol phosphate metabolism	Metabolism of Complex Lipids	Predicted oxidoreductase	General function prediction only
11700	1391373	NO	11.1	9.41	1.69	1	11.33	8.51	2.82	6.81921e-11	0	0	4	0	5	0	hydrolase activity, hydrolyzing O-glycosyl compounds | carbohydrate metabolic process	Glycoside hydrolase, catalytic core | Glycoside hydrolase, family 5
11699	1382656	NO	11.12	9.1	2.03	1	11.06	8.36	2.7	8.29072e-05	2	0	8	0	8	15	hydrolase activity, hydrolyzing O-glycosyl compounds | carbohydrate metabolic process	Glycoside hydrolase, family 5
11698	1378483	NO	10.93	9.11	1.83	1	10.84	8.37	2.48	5.90676e-07	0	0	2	0	8	0	gamma-glutamyltransferase activity	Gamma-glutamyltranspeptidase	2.3.2.2	Gamma-glutamyltransferase,	(5-L-glutamyl)-peptide + an amino acid = peptide + 5-L-glutamyl-amino acid,	Cyanoamino acid metabolism	Metabolism of Other Amino Acids	Gamma-glutamyltransferase	Amino acid transport and metabolism
11697	1221279	NO	11.71	9.57	2.14	1	10.82	8.13	2.69	4.36988e-07	0	0	0	0	0	0		MFS general substrate transporter | Protein of unknown function DUF895, eukaryotic						Uncharacterized conserved protein	Function unknown
11696	787390	NO	10.95	8.67	2.27	0.608269	11.64	8.72	2.92	5.84921e-06	0	0	0	0	0	0								von Willebrand factor and related coagulation proteins | von Willebrand factor and related coagulation proteins	Extracellular structures
11695	508157	NO	9.35	8.93	0.43	1	12.94	8.78	4.16	1.2351e-06	0	0	0	0	0	0
11694	1497119	NO	11.19	8.38	2.81	1	11.61	9.43	2.18	1	0	0	3	0	0	0	aromatic compound metabolic process | metabolic process | monooxygenase activity | electron transport | oxidoreductase activity | phenol 2-monooxygenase activity	Aromatic-ring hydroxylase | Monooxygenase, FAD-binding | Thioredoxin-like fold	1.14.13.7	Phenol 2-monooxygenase,	Phenol + NADPH + O(2) = catechol + NADP(+) + H(2)O,	gamma-Hexachlorocyclohexane degradation	Biodegradation of Xenobiotics	Monooxygenase involved in coenzyme Q (ubiquinone) biosynthesis | Monooxygenase involved in coenzyme Q (ubiquinone) biosynthesis	Coenzyme transport and metabolism
11813	1482946	YES	11.55	8	3.55	8.12929e-21	11.23	8.36	2.87	1.01558e-05	0	0	0	0	0	0	catalytic activity | lipid metabolic process | triacylglycerol lipase activity	Lipase, class 3 | Lipase, active site						Predicted lipase	Lipid transport and metabolism
11692	1455163	NO	10.76	8.81	1.95	1	11.62	8.89	2.73	0.000192139	0	0	0	0	0	0
11691	1449155	NO	10.04	8.44	1.59	1	12.02	9.61	2.41	0.0552577	17	0	15	0	24	0	binding | catalytic activity | metabolic process | oxidoreductase activity | carbonyl reductase (NADPH) activity	NAD(P)-binding | Glucose/ribitol dehydrogenase | Short-chain dehydrogenase/reductase SDR	1.1.1.184	Carbonyl reductase (NADPH),	R-CHOH-R' + NADP(+) = R-CO-R' + NADPH,	Prostaglandin and leukotriene metabolism	Metabolism of Complex Lipids	Reductases with broad range of substrate specificities	General function prediction only
11690	1442989	NO	11.28	8.81	2.47	1.10504e-05	11.8	8.76	3.04	2.88782e-19	0	0	23	0	24	0	hydrolase activity, hydrolyzing O-glycosyl compounds | carbohydrate metabolic process | beta-glucosidase activity	Glycoside hydrolase, family 3, N-terminal | Glycoside hydrolase, family 3, C-terminal | Glycoside hydrolase, catalytic core | PA14	3.2.1.21	Beta-glucosidase,	Hydrolysis of terminal, non-reducing beta-D-glucose residues with release of beta-D-glucose,	Starch and sucrose metabolism	Metabolism of Complex Carbohydrates
11689	1441231	NO	10.18	8.43	1.75	1	11.57	8.55	3.03	1.58219e-14	0	0	0	0	0	0	transport | membrane | transporter activity | integral to membrane | L-arabinose isomerase activity	MFS general substrate transporter | Major facilitator superfamily | Sugar transporter, conserved site | General substrate transporter	5.3.1.4	L-arabinose isomerase,	L-arabinose = L-ribulose,	Pentose and glucuronate interconversions	Carbohydrate Metabolism	Predicted transporter (major facilitator superfamily)	General function prediction only
11688	1387256	NO	11.24	8.09	3.15	8.63224e-26	11.76	8.96	2.8	5.69585e-12	0	0	0	0	0	0	catalytic activity | metabolic process | ligase activity | L-aminoadipate-semialdehyde dehydrogenase activity | aminoadipate-semialdehyde dehydrogenase complex	AMP-dependent synthetase and ligase | Amino acid adenylation	1.2.1.31	Aminoadipate-semialdehyde dehydrogenase,	L-2-aminoadipate 6-semialdehyde + NADP(+) + H(2)O = L-2-aminoadipate + NADPH,	Lysine biosynthesis	Amino Acid Metabolism	Non-ribosomal peptide synthetase/alpha-aminoadipate reductase and related enzymes	Secondary metabolites biosynthesis, transport and catabolism
11687	1310667	YES	10.5	9.44	1.06	1	12.1	9.39	2.71	0.0137985	7	0	11	0	19	4
11686	1593973	NO	12.56	8.74	3.82	3.63958e-45	11.41	10.61	0.79	1	0	0	0	0	0	0
11685	1587710	YES	12.49	8.04	4.45	3.63816e-67	11.42	10.7	0.72	1	0	0	0	0	0	0		Alpha/beta hydrolase fold-1 | Peptidase S33, tripeptidyl-peptidase C-terminal
11684	1512453	NO	12.04	9.01	3.03	4.17773e-22	12.72	9.7	3.03	4.10294e-18	0	0	0	0	0	0	transport | membrane | integral to membrane | amino acid transport | amino acid transmembrane transporter activity	Amino acid permease-associated region | Amino acid/polyamine transporter I | Amino acid permease, conserved site						Amino acid transporters	Amino acid transport and metabolism
11828	1458998	NO	12.37	10.17	2.2	1	11.35	8.53	2.81	8.27993e-05	0	0	0	0	0	0	iron ion binding | monooxygenase activity | electron transport | heme binding | fluorene oxygenase activity | mono-butyltin dioxygenase activity | limonene 8-monooxygenase activity | tri-n-butyltin dioxygenase activity | di-n-butyltin dioxygenase activity | methylsilanetriol hydroxylase activity | methyl tertiary butyl ether 3-monooxygenase activity | 4-nitrocatechol 4-monooxygenase activity | 4-…	Cytochrome P450, E-class, group IV | Cytochrome P450	1.14.-.-	Acting on paired donors, with incorporation or reduction of		gamma-Hexachlorocyclohexane degradation	Biodegradation of Xenobiotics	Cytochrome P450 CYP4/CYP19/CYP26 subfamilies | Cytochrome P450 CYP4/CYP19/CYP26 subfamilies	Lipid transport and metabolism
11682	1506661	NO	12.38	8.26	4.12	2.22511e-39	11.25	10.96	0.29	1	0	0	0	0	0	0	proteolysis | iron ion binding | electron transport | heme binding | caspase activity | electron carrier activity	Peptidase C14, caspase catalytic | Cytochrome c, monohaem						Metacaspase involved in regulation of apoptosis | Metacaspase involved in regulation of apoptosis	Cell cycle control, cell division, chromosome partitioning
11244	1451268	NO	11.09	5.87	5.22	4.85911e-58	10.11	7.54	2.57	0.0383816	0	0	5	0	8	0	binding | catalytic activity | metabolic process | oxidoreductase activity | 3-oxoacyl-[acyl-carrier-protein] reductase activity	NAD(P)-binding | Glucose/ribitol dehydrogenase | Short-chain dehydrogenase/reductase SDR	1.1.1.100	3-oxoacyl-[acyl-carrier protein] reductase,	(3R)-3-hydroxyacyl-[acyl-carrier protein] + NADP(+) = 3-oxoacyl- [acyl-carrier protein] + NADPH,	Fatty acid biosynthesis (path 1)	Lipid Metabolism	Mitochondrial/plastidial beta-ketoacyl-ACP reductase	Lipid transport and metabolism
11680	1446359	NO	13.11	8.59	4.52	1.43831e-92	13.19	10.36	2.83	6.82494e-10	0	0	0	0	0	0	transport | membrane | transporter activity | integral to membrane | sugar:hydrogen symporter activity | carbohydrate transport | L-arabinose isomerase activity	MFS general substrate transporter | Major facilitator superfamily | Sugar transporter, conserved site | General substrate transporter | Sugar transporter	5.3.1.4	L-arabinose isomerase,	L-arabinose = L-ribulose,	Pentose and glucuronate interconversions	Carbohydrate Metabolism	Predicted transporter (major facilitator superfamily)	General function prediction only
11679	1504535	YES	13.48	9.08	4.39	2.30848e-11	13.4	10	3.4	0.00159716	0	0	0	0	0	0		HMG-I and HMG-Y, DNA-binding						Uncharacterized conserved low complexity protein	Function unknown
11678	1452019	NO	13.55	10.92	2.63	2.46762e-05	13.45	10.1	3.35	5.4006e-16	0	0	0	0	0	0	transport | membrane | transporter activity | integral to membrane | sugar:hydrogen symporter activity | carbohydrate transport | L-arabinose isomerase activity	MFS general substrate transporter | Major facilitator superfamily | Sugar transporter, conserved site | General substrate transporter | Sugar transporter	5.3.1.4	L-arabinose isomerase,	L-arabinose = L-ribulose,	Pentose and glucuronate interconversions	Carbohydrate Metabolism	Predicted transporter (major facilitator superfamily)	General function prediction only
11777	1459087	NO	10.79	8.69	2.1	1	9.84	7.37	2.48	0.0401808	0	0	0	0	0	0	iron ion binding | monooxygenase activity | electron transport | heme binding | fluorene oxygenase activity | mono-butyltin dioxygenase activity | limonene 8-monooxygenase activity | tri-n-butyltin dioxygenase activity | di-n-butyltin dioxygenase activity | methylsilanetriol hydroxylase activity | methyl tertiary butyl ether 3-monooxygenase activity | 4-nitrocatechol 4-monooxygenase activity | 4-…	Cytochrome P450, E-class, group IV | Cytochrome P450	1.14.-.-	Acting on paired donors, with incorporation or reduction of		gamma-Hexachlorocyclohexane degradation	Biodegradation of Xenobiotics	Cytochrome P450 CYP4/CYP19/CYP26 subfamilies | Cytochrome P450 CYP4/CYP19/CYP26 subfamilies	Lipid transport and metabolism
11676	1450050	YES	12.81	10.18	2.63	6.59485e-06	12.53	10.18	2.35	0.106851	14	0	28	0	42	25	carbohydrate metabolic process | beta-galactosidase activity | beta-galactosidase complex	Glycoside hydrolase, catalytic core | Glycoside hydrolase, family 35	3.2.1.23	Beta-galactosidase,	Hydrolysis of terminal, non-reducing beta-D-galactose residues in beta-D-galactosides,	Glycosaminoglycan degradation	Metabolism of Complex Carbohydrates	Beta-galactosidase	Carbohydrate transport and metabolism
11675	1445816	NO	12.76	10.78	1.98	1	12.6	9.85	2.75	2.16772e-07	0	0	0	0	0	0	transport | membrane | transporter activity	Major intrinsic protein						Aquaporin (major intrinsic protein family)	Carbohydrate transport and metabolism
11674	1444330	NO	12.22	10.98	1.24	1	12.99	9.89	3.11	1.16975e-15	0	0	10	0	19	0	metabolic process | cytoplasm | glutathione transferase activity	Thioredoxin-like fold | Glutathione S-transferase, N-terminal | Glutathione S-transferase, C-terminal-like | Glutathione S-transferase, omega-class	2.5.1.18	Glutathione transferase,	RX + glutathione = HX + R-S-glutathione,	Glutathione metabolism	Metabolism of Other Amino Acids	Glutathione S-transferase	Posttranslational modification, protein turnover, chaperones
11673	1427600	YES	12.46	10.6	1.86	1	12.8	10.2	2.6	0.00105162	18	0	24	11	24	36	hydrolase activity | metabolic process | carboxylesterase activity	Carboxylesterase, type B | Lipase, GDXG, active site	3.1.1.1	Carboxylesterase,	A carboxylic ester + H(2)O = an alcohol + a carboxylic anion,			Carboxylesterase and related proteins	General function prediction only
11672	1387890	YES	13.23	9.78	3.45	4.28671e-05	12.97	8.55	4.42	2.25406e-09	0	0	0	0	0	0
11671	1381756	NO	12.69	9.83	2.86	5.45446e-08	12.72	9.45	3.26	3.12255e-12	0	0	0	0	0	0	metabolic process | lyase activity	Dihydrodipicolinate synthetase
11670	986803	NO	12	12.27	-0.27	1	12.05	9.31	2.73	0.715358	0	0	3	0	6	0	binding | catalytic activity | metabolic process | alcohol dehydrogenase activity | alcohol dehydrogenase activity, metal ion-independent | alcohol dehydrogenase activity, zinc-dependent | alcohol dehydrogenase activity, iron-dependent	NAD(P)-binding | Alcohol dehydrogenase, zinc-binding | Alcohol dehydrogenase GroES-like | GroES-like	1.1.1.1	Alcohol dehydrogenase,	An alcohol + NAD(+) = an aldehyde or ketone + NADH,	Bile acid biosynthesis	Lipid Metabolism	Alcohol dehydrogenase, class V	Secondary metabolites biosynthesis, transport and catabolism
11669	622242	NO	12.04	11.21	0.83	1	12.12	9.78	2.33	0.0663003	0	0	0	0	0	0	transport | membrane | nucleoside:sodium symporter activity | nucleoside binding	Concentrative nucleoside transporter | Na+ dependent nucleoside transporter | Na+ dependent nucleoside transporter, C-terminal | Nucleoside recognition						Concentrative Na+-nucleoside cotransporter CNT1/CNT2 | Concentrative Na+-nucleoside cotransporter CNT1/CNT2	Nucleotide transport and metabolism
11668	1504686	NO	11.79	12.16	-0.37	1	11.28	9.69	1.59	1	0	0	0	0	0	0	iron ion binding | monooxygenase activity | electron transport | heme binding | unspecific monooxygenase activity	Cytochrome P450 | Cytochrome P450, E-class, group I	1.14.14.1	Unspecific monooxygenase,	RH + reduced flavoprotein + O(2) = ROH + oxidized flavoprotein + H(2)O,	Tryptophan metabolism	Amino Acid Metabolism	Cytochrome P450 CYP2 subfamily	Secondary metabolites biosynthesis, transport and catabolism
11667	1441636	YES	12.39	11.36	1.02	1	11.45	9.98	1.46	1	12	4	19	15	33	51	proteolysis | subtilase activity | serine-type peptidase activity | tripeptidyl-peptidase I activity	Peptidase S8 and S53, subtilisin, kexin, sedolisin | Proteinase inhibitor, propeptide | Peptidase S53, propeptide	3.4.14.9	Tripeptidyl-peptidase I,	Release of an N-terminal tripeptide from a polypeptide,
11666	1437808	YES	13.28	12.1	1.18	1	12.89	9.29	3.6	8.49068e-13	27	7	24	11	12	8	proteolysis | metalloendopeptidase activity	Peptidase M35, deuterolysin
11665	1379629	YES	12.54	11.59	0.96	1	11.15	9.93	1.21	1	6	0	3	6	7	17	proteolysis | subtilase activity	Peptidase S8 and S53, subtilisin, kexin, sedolisin | Protease-associated PA						Subtilisin kexin isozyme-1/site 1 protease, subtilase superfamily	Posttranslational modification, protein turnover, chaperones
11664	1068702	NO	12.12	11.13	0.99	1	11.74	9.42	2.31	0.49924	0	0	0	0	0	0
11663	991949	NO	12.3	10.5	1.81	1	12.67	10.75	1.92	1	0	0	0	0	0	0
11662	1502207	YES	12.58	9.48	3.1	8.1548e-09	12.82	11.07	1.75	1	0	0	0	0	0	0		Cupredoxin
11661	1452531	NO	12.76	10.62	2.15	0.547009	12.5	11.37	1.13	1	0	0	0	0	0	0		WD40 repeat | WD40 repeat-like						WD40 repeat-containing protein	General function prediction only
11660	1451922	NO	12.26	10.43	1.82	1	12.53	10.45	2.08	1	0	0	0	0	0	0	sequence-specific DNA binding | DNA binding	Lambda repressor-like, DNA-binding | Helix-turn-helix type 3
11659	1448597	NO	12.46	9.82	2.64	0.00132199	11.96	11.21	0.75	1	0	0	0	0	0	0	gibberellin 2-beta-dioxygenase activity	2OG-Fe(II) oxygenase	1.14.11.13	Gibberellin 2-beta-dioxygenase,	Gibberellin 1 + 2-oxoglutarate + O(2) = 2-beta-hydroxygibberellin 1 + succinate + CO(2),			Iron/ascorbate family oxidoreductases | Iron/ascorbate family oxidoreductases	General function prediction only
11658	1444995	NO	12.9	11.04	1.86	1	12.96	11.27	1.69	1	0	0	2	0	0	0	transport | membrane | transporter activity | integral to membrane | sugar:hydrogen symporter activity | carbohydrate transport | L-arabinose isomerase activity	MFS general substrate transporter | Major facilitator superfamily | General substrate transporter | Sugar transporter	5.3.1.4	L-arabinose isomerase,	L-arabinose = L-ribulose,	Pentose and glucuronate interconversions	Carbohydrate Metabolism	Predicted transporter (major facilitator superfamily)	General function prediction only
11657	1441786	NO	11.93	10.22	1.71	1	12.88	11.37	1.51	1	0	0	3	0	11	0	hydrolase activity	Dienelactone hydrolase						Predicted hydrolase related to dienelactone hydrolase	General function prediction only
11656	1440727	NO	11.88	10.53	1.35	1	12.85	10.69	2.16	1	7	0	11	0	14	0		ThiJ/PfpI
11407	923553	YES	11.63	9.07	2.56	1	11.53	9.23	2.3	1	3	0	8	4	7	17	catalytic activity | lipid metabolic process | triacylglycerol lipase activity | phospholipase activity | lipase activity | 1-oxa-2-oxocycloheptane lactonase activity | sulfolactone hydrolase activity | 3,4-dihydrocoumarin hydrolase activity | butyrolactone hydrolase activity	Lipase, class 3 | Lipase, active site	3.1.1.-	Carboxylic ester hydrolases,		2,4-Dichlorobenzoate degradation	Biodegradation of Xenobiotics	Predicted lipase	Lipid transport and metabolism
11654	1386795	NO	12.78	10.83	1.96	1	12.98	11.07	1.92	1	0	0	0	0	0	0	transport | transporter activity | integral to membrane	MFS general substrate transporter | Major facilitator superfamily MFS-1 | Major facilitator superfamily						Synaptic vesicle transporter SVOP and related transporters (major facilitator superfamily)	General function prediction only
11653	641438	NO	13.62	11.65	1.98	1	14.17	11.29	2.88	1.36759e-05	0	0	0	0	0	0	ATP binding | protein kinase activity | protein amino acid phosphorylation	Protein kinase-like | Protein kinase, core
11652	1592816	NO	13.41	12.23	1.17	1	14.09	11.89	2.2	1	0	0	0	0	0	0	metabolic process | pyridoxal phosphate binding | biosynthetic process | transferase activity, transferring nitrogenous groups | transferase activity | tetrapyrrole biosynthetic process | 5-aminolevulinate synthase activity	Pyridoxal phosphate-dependent transferase, major region | Aminotransferase, class I and II | Aminotransferase, class-II, pyridoxal-phosphate binding site | Tetrapyrrole biosynthesis, 5-aminolevulinic acid synthase	2.3.1.37	5-aminolevulinic acid synthase,	Succinyl-CoA + glycine = 5-aminolevulinate + CoA + CO(2),	Glycine, serine and threonine metabolism	Amino Acid Metabolism	5-aminolevulinate synthase	Coenzyme transport and metabolism
11651	1537973	NO	14	12.15	1.86	1	13.88	10.18	3.69	0.0110526	0	0	3	0	12	0	binding | catalytic activity | metabolic process | oxidoreductase activity, acting on the CH-OH group of donors, NAD or NADP as acceptor | NAD binding | cofactor binding | formate dehydrogenase activity | formate dehydrogenase complex	NAD(P)-binding | D-isomer specific 2-hydroxyacid dehydrogenase, NAD-binding | D-isomer specific 2-hydroxyacid dehydrogenase, catalytic region	1.2.1.2	Formate dehydrogenase,	Formate + NAD(+) = CO(2) + NADH,	Glyoxylate and dicarboxylate metabolism	Carbohydrate Metabolism	Glyoxylate/hydroxypyruvate reductase (D-isomer-specific 2-hydroxy acid dehydrogenase superfamily)	Energy production and conversion
11650	1506644	NO	13.63	12.05	1.59	1	13.55	11.09	2.45	0.00109238	0	0	0	0	0	0		Oligopeptide transporter OPT superfamily | Tetrapeptide transporter, OPT1/isp4						Sexual differentiation process protein ISP4	Signal transduction mechanisms
11649	1450295	NO	14.38	12.32	2.05	1	15.08	11.53	3.55	2.4585e-32	0	0	0	0	0	0	transport | membrane | transporter activity | integral to membrane | sugar:hydrogen symporter activity | carbohydrate transport | L-arabinose isomerase activity	MFS general substrate transporter | Major facilitator superfamily | Sugar transporter, conserved site | General substrate transporter | Sugar transporter	5.3.1.4	L-arabinose isomerase,	L-arabinose = L-ribulose,	Pentose and glucuronate interconversions	Carbohydrate Metabolism	Predicted transporter (major facilitator superfamily)	General function prediction only
11648	1447848	YES	13.17	11.72	1.46	1	13.92	11.52	2.4	0.303171	0	0	0	0	0	0		Extracellular membrane protein, 8-cysteine region, CFEM | Extracellular membrane protein, 8-cysteine region, fungi						beta-1,6-N-acetylglucosaminyltransferase, contains WSC domain | beta-1,6-N-acetylglucosaminyltransferase, contains WSC domain	Carbohydrate transport and metabolism
11647	1446682	NO	14.14	11.3	2.84	1	15.23	12.47	2.76	1	2	0	15	0	23	0	oxidoreductase activity | C-3 sterol dehydrogenase (C-4 sterol decarboxylase) activity | 3-keto sterol reductase activity | aldo-keto reductase activity | isocitrate dehydrogenase activity | mevaldate reductase activity | gluconate dehydrogenase activity | steroid dehydrogenase activity | epoxide dehydrogenase activity | 5-exo-hydroxycamphor dehydrogenase activity | 2-hydroxytetrahydrofuran dehyd…	Aldo/keto reductase	1.1.1.-	With NAD(+) or NADP(+) as acceptor,		Bile acid biosynthesis	Lipid Metabolism	Voltage-gated shaker-like K+ channel, subunit beta/KCNAB	Energy production and conversion
11646	1443959	YES	15.11	12.29	2.82	1.71264e-05	15.36	12.03	3.33	9.69764e-12	7	0	2	0	0	0	protein kinase CK2 activity							Transcription initiation factor TFIID, subunit BDF1 and related bromodomain proteins	Transcription
11645	1436180	NO	13.71	11.93	1.78	1	13.96	11.95	2.02	1	0	0	24	0	31	0	metabolic process | oxidoreductase activity | aldehyde dehydrogenase (NAD) activity	Aldehyde dehydrogenase | Aldehyde/histidinol dehydrogenase | Aldehyde dehydrogenase, conserved site	1.2.1.3	Aldehyde dehydrogenase (NAD+),	An aldehyde + NAD(+) + H(2)O = an acid + NADH,	1,2-Dichloroethane degradation	Biodegradation of Xenobiotics	Aldehyde dehydrogenase	Energy production and conversion
11644	1426281	NO	13.64	11.17	2.47	0.0184419	14.78	11.71	3.07	1.54766e-07	0	0	3	0	29	0	oxidoreductase activity | aryl-alcohol dehydrogenase (NADP+) activity	Aldo/keto reductase	1.1.1.91	Aryl-alcohol dehydrogenase (NADP+),	An aromatic alcohol + NADP(+) = an aromatic aldehyde + NADPH,			Voltage-gated shaker-like K+ channel, subunit beta/KCNAB	Energy production and conversion
11643	1389476	NO	12.99	12.01	0.98	1	14.8	12.1	2.7	0.00037149	0	0	0	0	0	0	inositol oxygenase activity	Protein of unknown function DUF706	1.13.99.1	Myo-inositol oxygenase,	Myo-inositol + O(2) = D-glucuronate + H(2)O,	Inositol phosphate metabolism	Metabolism of Complex Lipids	Aldehyde reductase	General function prediction only
11642	7595	NO	13.34	13.13	0.21	1	12.8	13.65	-0.85	1	0	0	0	0	0	0								Serine/threonine protein kinase	Signal transduction mechanisms
11641	631545	NO	13.34	13.32	0.02	1	13.66	13.48	0.18	1	0	0	0	0	0	0	integral to membrane	CD9/CD37/CD63 antigen
11640	499786	NO	12.59	13.46	-0.87	1	13.11	13.04	0.07	1	0	0	0	0	0	0
11639	299946	YES	13.17	13.54	-0.37	1	13.17	12.91	0.26	1	5	4	2	8	0	0	extracellular region | cell wall biogenesis	Yeast cell wall synthesis KRE9KNH1
11638	236914	YES	11.48	12.7	-1.23	1	14.09	13.56	0.53	1	0	0	0	0	0	0								beta-1,6-N-acetylglucosaminyltransferase, contains WSC domain | beta-1,6-N-acetylglucosaminyltransferase, contains WSC domain	Carbohydrate transport and metabolism
11637	1535598	NO	12.71	13.55	-0.84	1	13.02	13.17	-0.15	1	0	0	0	0	0	0								Ca2+-modulated nonselective cation channel polycystin | Ca2+-modulated nonselective cation channel polycystin	Inorganic ion transport and metabolism
11636	1513566	NO	12.91	13.53	-0.62	1	13.04	13.71	-0.68	1	0	0	0	0	0	0	membrane | integral to membrane | iron ion binding | electron transport | oxidoreductase activity | FAD binding	Ferric reductase-like transmembrane component, N-terminal | FAD-binding 8 | Ferric reductase, NAD binding | Cytochrome b-245, heavy chain						Ferric reductase, NADH/NADPH oxidase and related proteins | Ferric reductase, NADH/NADPH oxidase and related proteins	Secondary metabolites biosynthesis, transport and catabolism
11635	1507872	YES	13.08	12.76	0.32	1	13.39	13.48	-0.09	1	2	0	4	0	2	0	proteolysis | subtilase activity | identical protein binding | negative regulation of catalytic activity | cerevisin activity	Peptidase S8 and S53, subtilisin, kexin, sedolisin | Proteinase inhibitor, propeptide | Proteinase inhibitor I9, subtilisin propeptide	3.4.21.48	Cerevisin,	Hydrolysis of proteins with broad specificity, and of BZ-Arg-OET > Ac-Tyr-OET, Does not hydrolyse peptide amides,			Subtilisin-related protease/Vacuolar protease B	Posttranslational modification, protein turnover, chaperones
11634	1501781	NO	13.25	13.45	-0.2	1	13.17	13.33	-0.16	1	0	0	0	0	2	0	nucleic acid binding | RNA binding | mRNA metabolic process	RNA recognition motif, RNP-1 | Polyadenylate-binding protein/Hyperplastic disc protein | RNA recognition, region 1 | Polyadenylate binding protein, human types 1, 2, 3, 4						Polyadenylate-binding protein (RRM superfamily) | Polyadenylate-binding protein (RRM superfamily)	Translation, ribosomal structure and biogenesis
11633	1499596	NO	13.01	14.15	-1.14	1	12.59	13.6	-1.01	1	0	0	2	0	8	0	carbohydrate metabolic process | pyridoxal phosphate binding | phosphorylase activity | glycogen phosphorylase activity	Glycosyl transferase, family 35 | Glycogen/starch/alpha-glucan phosphorylase	2.4.1.1	Phosphorylase,	{(1,4)-alpha-D-glucosyl}(N) + phosphate = {(1,4)-alpha-D-glucosyl}(N-1) + alpha-D-glucose 1-phosphate,	Starch and sucrose metabolism	Metabolism of Complex Carbohydrates	Glycogen phosphorylase	Carbohydrate transport and metabolism
11632	1486031	NO	12.94	13.2	-0.25	1	13.06	12.82	0.25	1	0	0	0	0	0	0	intracellular | structural constituent of ribosome | ribosome | translation | small ribosomal subunit	Nucleic acid-binding, OB-fold-like | Ribosomal protein S12/S23 | Ribosomal protein S23, eukaryotic/archaeal						40S ribosomal protein S23	Translation, ribosomal structure and biogenesis
11631	1481473	NO	12.81	13.47	-0.66	1	12.9	13.45	-0.55	1	0	0	0	0	0	0		Glycosyl transferase, family 2						Chitin synthase/hyaluronan synthase (glycosyltransferases)	Cell wall/membrane/envelope biogenesis
11630	1481249	NO	12.81	13.36	-0.55	1	12.78	13.03	-0.24	1	0	0	0	0	0	0								SWI-SNF chromatin-remodeling complex protein	Chromatin structure and dynamics
11629	1479939	NO	13.03	12.56	0.47	1	12.77	13.53	-0.75	1	0	0	4	0	6	0	biosynthetic process	Glycosyl transferase, group 1						Glycosyltransferase	Cell wall/membrane/envelope biogenesis
11628	1466492	YES	12.78	12.89	-0.11	1	13.02	13.76	-0.74	1	9	2	9	7	12	7	hydrolase activity, hydrolyzing O-glycosyl compounds | carbohydrate metabolic process	Glycoside hydrolase, catalytic core | Glycoside hydrolase, family 5 | Glycolipid anchored surface protein GAS1 | X8						Chitinase	Carbohydrate transport and metabolism
11627	1459217	NO	13	13.38	-0.37	1	13.51	13.4	0.11	1	0	0	0	0	0	0
11626	1457545	NO	13.34	13.93	-0.59	1	13.11	13	0.11	1	0	0	0	0	0	0	translation initiation factor activity | translational initiation	Nucleic acid-binding, OB-fold-like | KOW | Translation protein SH3-like | Eukaryotic initiation factor 5A hypusine (eIF-5A)						Translation initiation factor 5A (eIF-5A)	Translation, ribosomal structure and biogenesis
11625	1452940	NO	13.25	13.68	-0.44	1	13.44	13.49	-0.05	1	0	0	5	0	4	0	intracellular | GTP binding | small GTPase MEANted signal transduction | intracellular protein transport | protein transport	Ras GTPase | Ras small GTPase, Rab type | Small GTP-binding protein | ARF/SAR superfamily | ADP-ribosylation factor | GTP-binding protein SAR1						GTP-binding ADP-ribosylation factor Arf1	Intracellular trafficking, secretion, and vesicular transport
11624	1452935	NO	12.75	13.73	-0.98	1	12.64	13.15	-0.51	1	0	0	0	0	5	0	microtubule | GTP binding | microtubule-based process | GTPase activity | structural molecule activity | microtubule-based movement | protein complex | protein polymerization	Tubulin | Tubulin/FtsZ, GTPase | Tubulin/FtsZ, C-terminal | Alpha tubulin						Alpha tubulin	Cytoskeleton
11623	1446472	YES	12.75	13.61	-0.87	1	14.03	12.78	1.25	1	46	3	81	3	85	0		YD repeat						Uncharacterized conserved protein (Rhs family)	Function unknown
11622	1445162	NO	12.92	13.82	-0.9	1	13.07	12.99	0.08	1	0	0	0	0	0	0	intracellular | structural constituent of ribosome | ribosome | translation | protein modification process	Ubiquitin | Ribosomal protein S27a						Ubiquitin/40S ribosomal protein S27a fusion	Translation, ribosomal structure and biogenesis
11621	1443582	NO	12.95	13.6	-0.65	1	13.39	13.02	0.37	1	0	0	8	0	22	0	metabolic process | tricarboxylic acid cycle | 4 iron, 4 sulfur cluster binding | aconitate hydratase activity	Aconitase/3-isopropylmalate dehydratase large subunit, alpha/beta/alpha | Aconitase A/isopropylmalate dehydratase small subunit, swivel | Aconitase/3-isopropylmalate dehydratase, swivel | Aconitase, mitochondrial-like	4.2.1.3	Aconitate hydratase,	Citrate = cis-aconitate + H(2)O,	Glyoxylate and dicarboxylate metabolism	Carbohydrate Metabolism	Aconitase/homoaconitase (aconitase superfamily) | Aconitase/homoaconitase (aconitase superfamily)	Amino acid transport and metabolism
11620	1443494	NO	12.38	14.41	-2.03	1	13.24	13.08	0.16	1	0	0	13	0	28	0	metabolic process | electron transport | acyl-CoA dehydrogenase activity | oxidoreductase activity, acting on the CH-CH group of donors	Acyl-CoA dehydrogenase/oxidase, central region | Acyl-CoA dehydrogenase/oxidase C-terminal | Acyl-CoA dehydrogenase/oxidase, middle and N-terminal | Acyl-CoA oxidase/dehydrogenase, type 1	1.3.99.3	Acyl-CoA dehydrogenase,	Acyl-CoA + ETF = 2,3-dehydroacyl-CoA + reduced ETF,	Valine, leucine and isoleucine degradation	Amino Acid Metabolism	Predicted acyl-CoA dehydrogenase	General function prediction only
11619	1442418	NO	12.65	13.13	-0.48	1	12.85	13.68	-0.83	1	0	0	0	0	0	0	transport | ATP binding | ATPase activity | ATPase activity, coupled to transmembrane movement of substances | integral to membrane | nucleotide binding | nucleoside-triphosphatase activity	AAA+ ATPase, core | ABC transporter-like | ABC transporter, transmembrane region, type 1 | ABC transporter, transmembrane region						Multidrug/pheromone exporter, ABC superfamily	Secondary metabolites biosynthesis, transport and catabolism
11618	1441235	YES	12.55	13.01	-0.45	1	12.92	12.96	-0.04	1	0	0	3	0	3	4								beta-1,6-N-acetylglucosaminyltransferase, contains WSC domain | beta-1,6-N-acetylglucosaminyltransferase, contains WSC domain	Carbohydrate transport and metabolism
11617	1440684	NO	12.92	14.03	-1.12	1	12.61	13.65	-1.05	1	4	2	29	0	21	0	integral to membrane | nucleotide binding | nucleoside-triphosphatase activity | proton-transporting two-sector ATPase complex | hydrogen ion transporting ATPase activity, rotational mechanism | hydrogen ion transmembrane transporter activity | ATP synthesis coupled proton transport | hydrogen ion transporting ATP synthase activity, rotational mechanism | hydrogen-transporting two-sector ATPase a…	AAA+ ATPase, core | ATPase, F1/V1/A1 complex, alpha/beta subunit, nucleotide-binding | ATPase, F1/V1/A1 complex, alpha/beta subunit, C-terminal | ATPase, F1/V1/A1 complex, alpha/beta subunit, N-terminal | ATPase, F1 complex, beta subunit	3.6.3.14	H(+)-transporting two-sector ATPase,	ATP + H(2)O + H(+)(In) = ADP + phosphate + H(+)(Out),	ATP synthesis	Energy Metabolism	F0F1-type ATP synthase, beta subunit	Energy production and conversion
11382	1510312	NO	12.09	9.9	2.19	0.138085	11.82	9.97	1.84	1	0	0	0	0	0	0	iron ion binding | monooxygenase activity | electron transport | heme binding | unspecific monooxygenase activity	Cytochrome P450 | Cytochrome P450, E-class, group I	1.14.14.1	Unspecific monooxygenase,	RH + reduced flavoprotein + O(2) = ROH + oxidized flavoprotein + H(2)O,	Tryptophan metabolism	Amino Acid Metabolism	Cytochrome P450 CYP4/CYP19/CYP26 subfamilies | Cytochrome P450 CYP4/CYP19/CYP26 subfamilies	Lipid transport and metabolism
11615	1438135	YES	12.89	12.78	0.12	1	13.13	13.23	-0.1	1	14	4	8	15	5	0								RNA-binding protein ELAV/HU (RRM superfamily)	RNA processing and modification
11614	1428797	NO	13.32	13.31	0.01	1	12.97	13.31	-0.34	1	0	0	0	0	4	0	nucleic acid binding | metabolic process | amino acid binding	RNA recognition motif, RNP-1 | Amino acid-binding ACT						Predicted RNA binding protein, contains G-patch and Zn-finger domains	RNA processing and modification
11613	1406060	YES	13.43	13.29	0.13	1	12.82	13.37	-0.55	1	0	0	0	0	0	0								Splicing factor hnRNP-F and related RNA-binding proteins	RNA processing and modification
11612	1401873	NO	13.17	13.6	-0.43	1	12.99	13.26	-0.27	1	0	0	0	0	0	0	ubiquitin-protein ligase activity | regulation of ubiquitin-protein ligase activity | regulation of ubiquitin-protein ligase activity during meiotic cell cycle | positive regulation of ubiquitin-protein ligase activity | negative regulation of ubiquitin-protein ligase activity | small conjugating protein ligase activity | post-translational protein modification | regulation of protein metabolic p…	Ubiquitin-conjugating enzyme, E2 | Ubiquitin-conjugating enzyme/RWD-like	6.3.2.19	Ubiquitin--protein ligase,	ATP + ubiquitin + protein lysine = AMP + diphosphate + protein N-ubiquityllysine,			Ubiquitin-protein ligase	Posttranslational modification, protein turnover, chaperones
11611	1379754	NO	12.66	13.01	-0.35	1	12.71	13.13	-0.42	1	0	0	0	0	0	0		Tetratricopeptide region | Tetratricopeptide TPR-1 | Octicosapeptide/Phox/Bem1p						Sorbin and SH3 domain-containing protein	Signal transduction mechanisms
11610	1070023	NO	12.99	13.25	-0.26	1	13.09	13	0.09	1	2	0	5	0	7	0	calcium ion binding	Calcium-binding EF-hand						Calmodulin and related proteins (EF-Hand superfamily)	Signal transduction mechanisms
11609	1007911	NO	13.4	13.3	0.1	1	13.24	13.27	-0.03	1	0	0	0	0	0	0	nucleic acid binding	RNA recognition motif, RNP-1						FOG: RRM domain	General function prediction only
11608	991948	NO	14.1	13.09	1.01	1	14	13.22	0.78	1	0	0	0	0	0	0	nucleus | transcription regulator activity | regulation of transcription | exo-alpha-sialidase activity	Basic helix-loop-helix dimerisation region bHLH | Helix-loop-helix DNA-binding	3.2.1.18	Exo-alpha-sialidase,	Hydrolysis of alpha-(2->3)-, alpha-(2->6)-, alpha-(2->8)-glycosidic linkages of terminal sialic residues in oligosaccharides, glycoproteins, glycolipids, colominic acid and synthetic substrates,	N-Glycan degradation	Metabolism of Complex Carbohydrates	Nuclear receptor coregulator SMRT/SMRTER, contains Myb-like domains	Transcription
11607	18497	NO	15.4	14.44	0.96	1	14.96	14.41	0.55	1	0	0	0	0	0	0	nucleus | transcription regulator activity | regulation of transcription	Basic helix-loop-helix dimerisation region bHLH | Helix-loop-helix DNA-binding						bHLHZip transcription factor BIGMAX	Transcription
11606	1568006	NO	15.42	14.39	1.03	1	15.19	13.26	1.93	1	0	5	3	0	24	0	electron transport | response to oxidative stress | catalase activity	Catalase | Catalase, N-terminal	1.11.1.6	Catalase,	2 H(2)O(2) = O(2) + 2 H(2)O,	Tryptophan metabolism	Amino Acid Metabolism	Catalase	Inorganic ion transport and metabolism
11605	1507147	YES	13.17	13.95	-0.78	1	15.22	14.27	0.95	1	0	0	0	0	0	0								Ca2+-modulated nonselective cation channel polycystin | Ca2+-modulated nonselective cation channel polycystin	Inorganic ion transport and metabolism
11604	1502676	YES	14.7	13.66	1.05	1	14.53	12.14	2.4	0.00490499	0	0	0	0	0	0		Cupredoxin
11603	1479882	YES	14.35	13.03	1.31	1	14.36	13.63	0.74	1	0	0	0	0	0	0	licheninase activity	Cupredoxin	3.2.1.73	Licheninase,	Hydrolysis of 1,4-beta-D-glycosidic linkages in beta-D-glucans containing 1,3- and 1,4-bonds,			Serine/threonine protein phosphatase 2A, regulatory subunit	Signal transduction mechanisms
11602	1456897	NO	14.31	13.64	0.67	1	14.44	13.27	1.17	1	2	0	23	0	29	0	metabolic process | oxidoreductase activity | aldehyde dehydrogenase (NAD) activity	Aldehyde dehydrogenase | Aldehyde/histidinol dehydrogenase | Aldehyde dehydrogenase, conserved site	1.2.1.3	Aldehyde dehydrogenase (NAD+),	An aldehyde + NAD(+) + H(2)O = an acid + NADH,	1,2-Dichloroethane degradation	Biodegradation of Xenobiotics	Aldehyde dehydrogenase	Energy production and conversion
11601	1456165	NO	13.67	13.8	-0.13	1	14.31	12.7	1.6	1	0	0	0	0	0	0	membrane | transporter activity | oligopeptide transport	MFS general substrate transporter | TGF-beta receptor, type I/II extracellular region						H+/oligopeptide symporter	Amino acid transport and metabolism
11600	1447539	NO	15.16	13.85	1.31	1	14.92	13.82	1.1	1	0	0	8	0	11	0	nitrogen compound metabolic process | glutamate-ammonia ligase activity | glutamine biosynthetic process	Glutamine synthetase, catalytic region | Glutamine synthetase, beta-Grasp	6.3.1.2	Glutamate--ammonia ligase,	ATP + L-glutamate + NH(3) = ADP + phosphate + L-glutamine,	Peptidoglycan biosynthesis	Metabolism of Complex Carbohydrates	Glutamine synthetase	Amino acid transport and metabolism
11599	1445720	YES	13.32	13.47	-0.15	1	14.62	13.33	1.28	1	0	0	0	0	0	0								beta-1,6-N-acetylglucosaminyltransferase, contains WSC domain | beta-1,6-N-acetylglucosaminyltransferase, contains WSC domain	Carbohydrate transport and metabolism
11598	1431494	YES	14.03	13.64	0.39	1	14.59	14.15	0.44	1	0	0	0	0	0	0
11597	1414392	YES	14.55	14.21	0.35	1	15.02	14.26	0.76	1	0	0	3	0	4	0	nucleic acid binding	RNA recognition motif, RNP-1						FOG: RRM domain	General function prediction only
11596	1585643	NO	14.67	15.09	-0.41	1	14.95	15.06	-0.11	1	0	0	0	0	0	0	DNA-directed RNA polymerase activity | DNA-directed RNA polymerase I activity | DNA-directed RNA polymerase II activity | DNA-directed RNA polymerase III activity | RNA polymerase activity		2.7.7.6	DNA-directed RNA polymerase,	N nucleoside triphosphate = N diphosphate + {RNA}(N),	RNA polymerase	TRANSCRIPTION	Projectin/twitchin and related proteins	Cytoskeleton
11595	1562525	NO	14.25	16.77	-2.52	0.000157235	13.9	16.26	-2.35	0.0483786	0	0	12	0	22	0	ATP binding | protein folding | unfolded protein binding	ATP-binding region, ATPase-like | Heat shock protein Hsp90						Molecular chaperone (HSP90 family)	Posttranslational modification, protein turnover, chaperones
11594	1517277	NO	15.86	15.8	0.06	1	15.58	15.42	0.17	1	3	0	23	0	20	0	GTP binding | GTPase activity | translation | cytoplasm | translation elongation factor activity | translational elongation | protein-synthesizing GTPase activity	Protein synthesis factor, GTP-binding | Translation elongation factor EFTu/EF1A, domain 2 | Translation elongation and initiation factors/Ribosomal, beta-barrel | Translation elongation factor EFTu/EF1A, C-terminal | Translation elongation factor EF1A/initiation factor IF2gamma, C-terminal | Translation elongation factor EF1A, eukaryotic and archaeal						Translation elongation factor EF-1 alpha/Tu	Translation, ribosomal structure and biogenesis
11593	1484951	YES	14.89	14.93	-0.04	1	15.52	14.95	0.57	1	0	0	4	0	11	0	protein folding | peptidyl-prolyl cis-trans isomerase activity | cyclophilin | FK506-sensitive peptidyl-prolyl cis-trans isomerase | cyclophilin-type peptidyl-prolyl cis-trans isomerase activity	Peptidyl-prolyl cis-trans isomerase, cyclophilin-type | Cyclophilin-like	5.2.1.8	Peptidylprolyl isomerase,	Peptidylproline (omega=180) = peptidylproline (omega=0),			Cyclophilin type peptidyl-prolyl cis-trans isomerase	Posttranslational modification, protein turnover, chaperones
11592	1479694	NO	15.32	15.56	-0.25	1	15.16	15.89	-0.73	1	0	0	2	0	0	0	binding | ATP binding | nucleus | ATPase activity | nucleotide binding | nucleoside-triphosphatase activity | sugar:hydrogen symporter activity | chromatin | chromatin binding | chromatin assembly or disassembly | phosphoenolpyruvate-dependent sugar phosphotransferase system	AAA+ ATPase, core | Armadillo-type fold | Chromo domain | Chromo domain-like | ABC transporter-like | HEAT | Phosphotransferase system, HPr serine phosphorylation site						ATPase component of ABC transporters with duplicated ATPase domains/Translation elongation factor EF-3b | ATPase component of ABC transporters with duplicated ATPase domains/Translation elongation factor EF-3b	Translation, ribosomal structure and biogenesis
11591	1446750	NO	14.33	15.05	-0.71	1	14.33	14.54	-0.21	1	10	0	6	0	11	6	protein binding | ATP binding	Actin/actin-like | Actin, conserved site						Actin and related proteins	Cytoskeleton
11590	1441425	NO	14.33	15.97	-1.64	1	14.38	15.8	-1.42	1	6	0	0	0	14	3	protein modification process	Ubiquitin						Ubiquitin and ubiquitin-like proteins | Ubiquitin and ubiquitin-like proteins	General function prediction only
11589	1439837	NO	13.97	16.76	-2.79	5.85729e-11	13.88	16.2	-2.32	0.0569093	2	5	11	3	28	0	ATP binding	Heat shock protein 70 | Heat shock protein Hsp70						Molecular chaperones HSP70/HSC70, HSP70 superfamily	Posttranslational modification, protein turnover, chaperones
11588	1428279	YES	14.01	16.73	-2.72	4.71724e-07	13.74	15.57	-1.83	1	0	2	0	2	0	0
11587	1412526	YES	14.51	14.89	-0.38	1	14.97	14.5	0.47	1	0	2	0	3	0	0		Glycoside hydrolase, catalytic core						NF-kappa B regulator AP20/Cezanne	Signal transduction mechanisms
11586	919811	YES	11.63	6.5	5.14	9.42122e-59	12.06	6.25	5.81	5.91414e-75	9	0	18	0	15	0	hydrolase activity, hydrolyzing O-glycosyl compounds | carbohydrate metabolic process	Glycoside hydrolase, family 7 | Concanavalin A-like lectin/glucanase
11585	451035	YES	12.51	7.43	5.08	2.66465e-88	12.24	6.97	5.27	1.09239e-81	8	0	13	0	16	9	carbohydrate metabolic process | polygalacturonase activity	Pectin lyase fold/virulence factor | Glycoside hydrolase, family 28	3.2.1.15	Polygalacturonase,	Random hydrolysis of 1,4-alpha-D-galactosiduronic linkages in pectate and other galacturonans,	Pentose and glucuronate interconversions	Carbohydrate Metabolism
11584	34310	YES	11.18	6.87	4.31	3.72215e-33	11.33	6.21	5.13	9.8482e-47	2	0	5	0	6	8	lipid metabolic process | hydrolase activity, acting on ester bonds	Lipase, GDSL | Esterase, SGNH hydrolase-type
11583	1507789	NO	11.97	6.85	5.12	2.34923e-59	11.66	6.83	4.84	2.10301e-40	0	0	0	0	0	0	transport | membrane | transporter activity | integral to membrane	Major intrinsic protein | Aquaporin						Aquaporin (major intrinsic protein family)	Carbohydrate transport and metabolism
11582	1505094	NO	11.64	7.41	4.22	8.23512e-47	11.9	6.94	4.96	1.20992e-65	0	0	0	0	0	0	transport | transporter activity | integral to membrane	MFS general substrate transporter | Major facilitator superfamily MFS-1 | Major facilitator superfamily						Permease of the major facilitator superfamily	Carbohydrate transport and metabolism
11581	1504804	YES	11.55	6.52	5.03	4.66601e-42	11.49	6.03	5.46	2.96623e-44	2	0	5	0	0	0
11580	1485211	YES	11.58	7.13	4.45	3.35621e-52	11.58	7.6	3.98	1.10091e-30	0	0	6	0	0	0	catalytic activity | carbohydrate metabolic process | carbohydrate binding | carbon-oxygen lyase activity, acting on polysaccharides	Glycoside hydrolase-type carbohydrate-binding | Galactose-binding like | Carbohydrate-binding-like fold | Rhamnogalacturonase B, N-terminal
11579	1484991	YES	12.3	7.21	5.08	1.71523e-81	11.43	7.58	3.85	4.72601e-27	15	0	11	0	17	31		Peptidase M36, fungalysin		ANDER: Fungalysin metallopeptidase (M36)
11578	1450481	NO	12.06	5.91	6.15	2.31864e-09	11.88	7.33	4.54	0.00489664	0	0	4	0	10	0	catalytic activity | O-methyltransferase activity	O-methyltransferase, family 2 | Orn/DAP/Arg decarboxylase 2						Hydroxyindole-O-methyltransferase and related SAM-dependent methyltransferases	General function prediction only
11577	1443648	YES	11.66	6.57	5.09	5.41572e-25	11.71	6.92	4.79	1.14608e-15	0	0	0	0	0	0
11576	1397385	YES	11.84	6.22	5.61	4.49993e-95	11.85	6.56	5.29	1.52544e-75	5	0	14	0	10	0	nucleic acid binding | extracellular region | hydrolase activity, hydrolyzing O-glycosyl compounds | carbohydrate metabolic process | cellulose binding | methyltransferase activity | methylation	Cellulose-binding region, fungal | N-6 adenine-specific DNA methylase, conserved site
11575	1394244	YES	11.59	7.15	4.44	5.06519e-38	11.45	6.97	4.48	1.12187e-31	11	0	6	0	0	0	oxidoreductase activity | copper ion binding | laccase activity	Cupredoxin | Multicopper oxidase, type 1 | Multicopper oxidase, type 2 | Multicopper oxidase, type 3 | Multicopper oxidase, copper-binding site	1.10.3.2	Laccase,	4 benzenediol + O(2) = 4 benzosemiquinone + 2 H(2)O,			Multicopper oxidases	Secondary metabolites biosynthesis, transport and catabolism
11574	1379363	YES	11.57	6.9	4.67	2.27811e-65	12	7.03	4.97	2.3072e-69	5	0	8	0	9	8	carbohydrate metabolic process | polygalacturonase activity	Pectin lyase fold/virulence factor | Parallel beta-helix repeat | Glycoside hydrolase, family 28	3.2.1.15	Polygalacturonase,	Random hydrolysis of 1,4-alpha-D-galactosiduronic linkages in pectate and other galacturonans,	Pentose and glucuronate interconversions	Carbohydrate Metabolism
11573	409584	NO	11.37	6.45	4.92	7.86311e-05	13.07	8.93	4.14	0.460395	0	0	0	0	2	0	iron ion binding | monooxygenase activity | electron transport | heme binding | fluorene oxygenase activity | mono-butyltin dioxygenase activity | limonene 8-monooxygenase activity | tri-n-butyltin dioxygenase activity | di-n-butyltin dioxygenase activity | methylsilanetriol hydroxylase activity | methyl tertiary butyl ether 3-monooxygenase activity | 4-nitrocatechol 4-monooxygenase activity | 4-…	Cytochrome P450 | Cytochrome P450, E-class, group I	1.14.-.-	Acting on paired donors, with incorporation or reduction of		gamma-Hexachlorocyclohexane degradation	Biodegradation of Xenobiotics	Cytochrome P450 CYP2 subfamily	Secondary metabolites biosynthesis, transport and catabolism
8893	1434321	NO	9.22	6.45	2.77	0.559798	7.78	6.09	1.68	1	0	0	0	0	0	0	iron ion binding | monooxygenase activity | electron transport | heme binding | leukotriene-B4 20-monooxygenase activity	Cytochrome P450 | Cytochrome P450, E-class, group I	1.14.13.30	Leukotriene-B4 20-monooxygenase,	(6Z,8E,10E,14Z)-(5S,12R)-5,12-dihydroxyicosa-6,8,10,14-tetraenoate + NADPH + O(2) = (6Z,8E,10E,14Z)-(5S,12R)-5,12,20-trihydroxyicosa- 6,8,10,14-tetraenoate + NADP(+) + H(2)O,	Prostaglandin and leukotriene metabolism	Metabolism of Complex Lipids	Cytochrome P450 CYP4/CYP19/CYP26 subfamilies | Cytochrome P450 CYP4/CYP19/CYP26 subfamilies	Lipid transport and metabolism
11571	249585	NO	11.93	7.27	4.66	5.48892e-36	12.1	8.53	3.58	4.24072e-11	0	0	0	0	0	0
11570	20454	YES	11.86	8.2	3.66	5.48892e-36	12.68	7.52	5.16	1.71506e-98	2	0	4	0	5	0	catalytic activity | aromatic compound metabolic process | ferric iron binding | iron ion binding | oxidoreductase activity, acting on single donors with incorporation of molecular oxygen, incorporation of two atoms of oxygen	Intradiol ring-cleavage dioxygenase, C-terminal | Intradiol ring-cleavage dioxygenase, core
11569	1485569	YES	11.86	7.21	4.65	7.1961e-35	11.74	8.16	3.59	1.58595e-10	3	0	7	6	12	44	proteolysis | pepsin A activity | aspartic-type endopeptidase activity	Peptidase A1 | Peptidase aspartic, active site | Peptidase aspartic, catalytic	3.4.23.3	Gastricsin,	More restricted specificity than pepsin A, but shows preferential cleavage at Tyr-|-Xaa bonds; high activity towards hemoglobin as substrate,			Aspartyl protease	Posttranslational modification, protein turnover, chaperones
11568	1483937	YES	11.74	7.78	3.96	2.91188e-43	12.42	7.99	4.43	5.13311e-55	0	0	0	0	0	0		Glycoside hydrolase, family 61 | Fibronectin, type III-like fold
11567	1454150	YES	11.28	6.79	4.49	3.45228e-38	12.43	8.16	4.27	2.86306e-26	0	0	0	0	3	51	proteolysis | pepsin A activity | aspartic-type endopeptidase activity	Peptidase A1 | Peptidase aspartic, active site | Peptidase aspartic, catalytic	3.4.23.1	Pepsin A,	Preferential cleavage: hydrophobic, preferably aromatic, residues in P1 and P1' positions, Cleaves 1-Phe-|-Val-2, 4-Gln-|-His-5, 13-Glu-|- Ala-14, 14-Ala-|-Leu-15, 15-Leu-|-Tyr-16, 16-Tyr-|-Leu-17, 23-Gly-|- Phe-24, 24-Phe-|-Phe-25 and 25-Phe-|-Tyr-26 bon			Aspartyl protease	Posttranslational modification, protein turnover, chaperones
11566	1449006	YES	11.77	8.16	3.61	1.16302e-28	12.23	7.74	4.49	3.4451e-54	6	0	13	0	7	0		Protein of unknown function DUF1680
11565	1607100	YES	10.56	7.4	3.16	2.83641e-08	12.4	7.84	4.56	6.12882e-25	0	0	0	0	8	0	electron transport | heme binding | peroxidase activity | response to oxidative stress | L-ascorbate peroxidase activity	Haem peroxidase, plant/fungal/bacterial | Fungal lignin peroxidase | Haem peroxidase	1.11.1.11	L-ascorbate peroxidase,	L-ascorbate + H(2)O(2) = dehydroascorbate + 2 H(2)O,	Ascorbate and aldarate metabolism	Carbohydrate Metabolism
11564	1444107	YES	11.65	8.12	3.53	3.73131e-24	12.75	7.69	5.06	2.05848e-71	0	0	2	0	3	2		Concanavalin A-like lectin/glucanase
11563	1437541	YES	10.35	6.84	3.51	1.13062e-12	12.59	8.94	3.65	2.53368e-11	0	0	0	0	0	0		Immunoglobulin/major histocompatibility complex, conserved site						beta-1,6-N-acetylglucosaminyltransferase, contains WSC domain | beta-1,6-N-acetylglucosaminyltransferase, contains WSC domain	Carbohydrate transport and metabolism
11562	1393557	YES	11.8	7.98	3.82	3.74724e-24	11.82	7.42	4.39	7.61975e-34	0	0	0	0	0	0
11561	1392314	YES	11.71	7.1	4.61	5.99618e-89	12.82	7.45	5.37	3.51666e-136	5	0	7	0	8	20	cell wall | pectinesterase activity | cell wall modification	Pectin lyase fold/virulence factor | Pectinesterase, catalytic
11560	1607102	NO	11.36	7.42	3.94	5.48076e-25	12.37	7.42	4.95	7.43412e-43	0	0	5	0	8	0	electron transport | heme binding | peroxidase activity | response to oxidative stress | L-ascorbate peroxidase activity	Haem peroxidase, plant/fungal/bacterial | Fungal lignin peroxidase | Haem peroxidase	1.11.1.11	L-ascorbate peroxidase,	L-ascorbate + H(2)O(2) = dehydroascorbate + 2 H(2)O,	Ascorbate and aldarate metabolism	Carbohydrate Metabolism
11559	299344	NO	10.58	8.02	2.56	9.32148e-06	10.4	7.29	3.1	1.58219e-14	0	0	0	0	0	0
11558	252309	NO	10.93	7.58	3.35	2.50678e-17	10.48	6.93	3.55	6.93989e-19	0	0	0	0	0	0	binding | catalytic activity | metabolic process | oxidoreductase activity | FAD binding	NAD(P)-binding | FAD-dependent pyridine nucleotide-disulphide oxidoreductase | Pyridine nucleotide-disulphide oxidoreductase, NAD-binding region | FAD dependent oxidoreductase						Flavin-containing monooxygenase	Secondary metabolites biosynthesis, transport and catabolism
11557	1483890	YES	10.74	7	3.74	1.70889e-29	10.39	6.73	3.66	9.72896e-23	0	0	8	0	7	2	extracellular region | hydrolase activity, hydrolyzing O-glycosyl compounds | carbohydrate metabolic process | cellulose binding	Cellulose-binding region, fungal | Concanavalin A-like lectin/glucanase | Glycoside hydrolase, family 11
11556	1456734	YES	11.02	7.84	3.19	1.09878e-11	10.32	7.36	2.96	5.56649e-06	2	0	7	0	6	0	carboxylesterase activity	Carboxylesterase, type B	3.1.1.1	Carboxylesterase,	A carboxylic ester + H(2)O = an alcohol + a carboxylic anion,			Acetylcholinesterase/Butyrylcholinesterase	Signal transduction mechanisms
11555	1443425	NO	10.65	7.69	2.96	4.3192e-12	10.58	6.33	4.26	9.95897e-43	0	0	0	0	0	0	catalytic activity	Six-hairpin glycosidase-like | Glycosyl hydrolase, family 88
11554	1420400	YES	10.8	7.36	3.45	3.32512e-27	10.44	7.13	3.31	1.39068e-18	17	0	33	0	23	0	extracellular region | hydrolase activity, hydrolyzing O-glycosyl compounds | carbohydrate metabolic process | cellulose binding	Cellulose-binding region, fungal | Glycoside hydrolase, family 6 | 1, 4-beta cellobiohydrolase
11553	1394237	NO	10.66	7.93	2.73	4.46695e-08	10.47	7.21	3.26	1.57017e-17	0	0	6	0	11	0	metabolic process	Pyridoxal phosphate-dependent transferase, major region | Aminotransferase, class V/Cysteine desulphurase						Cysteine desulfurase NFS1	Amino acid transport and metabolism
11552	1543569	NO	10.64	6.66	3.98	6.35641e-47	10.74	8.37	2.37	0.0162145	0	0	0	0	0	0	binding | zinc ion binding | catalytic activity | metabolic process | oxidoreductase activity | (R,R)-butanediol dehydrogenase activity	NAD(P)-binding | Alcohol dehydrogenase, zinc-binding | Alcohol dehydrogenase GroES-like | GroES-like | Alcohol dehydrogenase, zinc-containing, conserved site	1.1.1.4	(R,R)-butanediol dehydrogenase,	(R,R)-butane-2,3-diol + NAD(+) = (R)-acetoin + NADH,	Butanoate metabolism	Carbohydrate Metabolism	Sorbitol dehydrogenase	Secondary metabolites biosynthesis, transport and catabolism
11551	1523827	NO	10.71	7.11	3.6	1.2159e-23	10.24	8.23	2.01	1	0	0	0	0	0	0
11550	1507318	YES	10.2	7.26	2.94	1	10.45	9.22	1.23	1	0	0	10	0	9	0	binding | catalytic activity | metabolic process | oxidoreductase activity | 3-oxoacyl-[acyl-carrier-protein] reductase activity	NAD(P)-binding | Glucose/ribitol dehydrogenase | Short-chain dehydrogenase/reductase SDR	1.1.1.100	3-oxoacyl-[acyl-carrier protein] reductase,	(3R)-3-hydroxyacyl-[acyl-carrier protein] + NADP(+) = 3-oxoacyl- [acyl-carrier protein] + NADPH,	Fatty acid biosynthesis (path 1)	Lipid Metabolism	Reductases with broad range of substrate specificities	General function prediction only
11549	1505130	NO	9.99	6.62	3.37	1.47597e-11	10.7	8.73	1.97	1	0	0	0	0	0	0
11548	1482858	NO	10.04	6.84	3.19	0.00520124	10.78	9.28	1.5	1	0	0	0	0	3	0	binding | catalytic activity | metabolic process | oxidoreductase activity | 3-oxoacyl-[acyl-carrier-protein] reductase activity	NAD(P)-binding | Glucose/ribitol dehydrogenase | Short-chain dehydrogenase/reductase SDR	1.1.1.100	3-oxoacyl-[acyl-carrier protein] reductase,	(3R)-3-hydroxyacyl-[acyl-carrier protein] + NADP(+) = 3-oxoacyl- [acyl-carrier protein] + NADPH,	Fatty acid biosynthesis (path 1)	Lipid Metabolism	Dehydrogenases with different specificities (related to short-chain alcohol dehydrogenases)	Secondary metabolites biosynthesis, transport and catabolism
11547	1480987	NO	10.86	7.08	3.78	8.25921e-38	10.47	9.11	1.36	1	0	0	0	0	0	0	copper ion binding | amine oxidase activity | amine metabolic process | quinone binding	Copper amine oxidase | Copper amine oxidase, C-terminal | Copper amine oxidase, N2-terminal | Region of unknown function DUF1965 | Copper amine oxidase, N-terminal region	1.4.3.6	Amine oxidase (copper-containing),	RCH(2)NH(2) + H(2)O + O(2) = RCHO + NH(3) + H(2)O(2),	Phenylalanine metabolism	Amino Acid Metabolism	Copper amine oxidase	Secondary metabolites biosynthesis, transport and catabolism
11546	1446512	NO	10.23	7.59	2.64	1.85247e-06	10.9	9.26	1.64	1	0	0	0	0	6	0	binding | catalytic activity | metabolic process | oxidoreductase activity, acting on the CH-OH group of donors, NAD or NADP as acceptor | NAD binding | cofactor binding | phosphoglycerate dehydrogenase activity	NAD(P)-binding | D-isomer specific 2-hydroxyacid dehydrogenase, NAD-binding | D-isomer specific 2-hydroxyacid dehydrogenase, catalytic region	1.1.1.95	Phosphoglycerate dehydrogenase,	3-phosphoglycerate + NAD(+) = 3-phosphohydroxypyruvate + NADH,	Glycine, serine and threonine metabolism	Amino Acid Metabolism	Glyoxylate/hydroxypyruvate reductase (D-isomer-specific 2-hydroxy acid dehydrogenase superfamily)	Energy production and conversion
11545	1445566	NO	10.73	7.16	3.57	1.26036e-18	11	8.26	2.74	0.00201503	0	0	0	0	0	0	transport | membrane | amino acid transport | amino acid transmembrane transporter activity	Amino acid permease-associated region | Amino acid/polyamine transporter I						Amino acid transporters	Amino acid transport and metabolism
11544	1438360	NO	9.99	6.88	3.11	6.7767e-16	10.53	8.81	1.72	1	0	0	0	0	5	0
11543	1402345	NO	10.41	6.74	3.67	0.0165401	11.07	9.34	1.73	1	0	0	0	0	0	0	iron ion binding | monooxygenase activity | electron transport | heme binding | flavonoid 3'-monooxygenase activity	Cytochrome P450 | Cytochrome P450, E-class, group I	1.14.13.21	Flavonoid 3'-monooxygenase,	A flavonoid + NADPH + O(2) = 3'-hydroxyflavonoid + NADP(+) + H(2)O,	Flavonoids, stilbene and lignin biosynthesis	Biosynthesis of Secondary Metabolites	Cytochrome P450 CYP2 subfamily	Secondary metabolites biosynthesis, transport and catabolism
11542	1486112	NO	9.63	7.26	2.37	0.0214228	10.49	8	2.49	0.00974524	0	0	0	0	0	0	iron ion binding | monooxygenase activity | electron transport | heme binding | unspecific monooxygenase activity	Cytochrome P450 | Cytochrome P450, E-class, group I	1.14.14.1	Unspecific monooxygenase,	RH + reduced flavoprotein + O(2) = ROH + oxidized flavoprotein + H(2)O,	Tryptophan metabolism	Amino Acid Metabolism	Cytochrome P450 CYP2 subfamily	Secondary metabolites biosynthesis, transport and catabolism
11541	1482456	NO	9.8	6.51	3.29	4.01315e-15	10.34	7.97	2.36	0.152872	0	0	0	0	0	0	gibberellin 2-beta-dioxygenase activity	2OG-Fe(II) oxygenase	1.14.11.13	Gibberellin 2-beta-dioxygenase,	Gibberellin 1 + 2-oxoglutarate + O(2) = 2-beta-hydroxygibberellin 1 + succinate + CO(2),			Iron/ascorbate family oxidoreductases | Iron/ascorbate family oxidoreductases	General function prediction only
11540	1443811	NO	8.95	6.97	1.98	1	10.73	7.69	3.04	1.26869e-10	0	0	0	0	0	0	electron transport | oxidoreductase activity | F420H2 dehydrogenase activity | sulfur oxygenase reductase activity | malolactic enzyme activity | regulation of oxidoreductase activity	Taurine catabolism dioxygenase TauD/TfdA	1.-.-.-	Oxidoreductases,
11539	1419252	NO	9.41	7.06	2.35	0.119468	10.69	7.39	3.3	1.48239e-10	0	0	0	0	0	0	transport | transporter activity | integral to membrane	MFS general substrate transporter | Major facilitator superfamily MFS-1 | Major facilitator superfamily						Permease of the major facilitator superfamily	Carbohydrate transport and metabolism
11683	1512016	NO	11.8	8.94	2.86	3.37082e-05	12	10.37	1.63	1	0	0	0	0	0	0	iron ion binding | monooxygenase activity | electron transport | heme binding | unspecific monooxygenase activity	Cytochrome P450 | Cytochrome P450, E-class, group I	1.14.14.1	Unspecific monooxygenase,	RH + reduced flavoprotein + O(2) = ROH + oxidized flavoprotein + H(2)O,	Tryptophan metabolism	Amino Acid Metabolism	Cytochrome P450 CYP4/CYP19/CYP26 subfamilies | Cytochrome P450 CYP4/CYP19/CYP26 subfamilies	Lipid transport and metabolism
11537	1401641	NO	9.29	7.51	1.79	1	11.01	7.64	3.37	1.33467e-12	0	0	0	0	0	0	iron ion binding | monooxygenase activity | electron transport | heme binding | unspecific monooxygenase activity	Cytochrome P450 | Cytochrome P450, E-class, group I	1.14.14.1	Unspecific monooxygenase,	RH + reduced flavoprotein + O(2) = ROH + oxidized flavoprotein + H(2)O,	Tryptophan metabolism	Amino Acid Metabolism	Cytochrome P450 CYP2 subfamily	Secondary metabolites biosynthesis, transport and catabolism
11536	1385633	NO	9.2	6.92	2.28	0.0930184	10.69	8.56	2.13	1	0	0	0	0	7	0	glutathione transferase activity	Thioredoxin-like fold | Glutathione S-transferase, C-terminal | Glutathione S-transferase, N-terminal | Glutathione S-transferase, C-terminal-like	2.5.1.18	Glutathione transferase,	RX + glutathione = HX + R-S-glutathione,	Glutathione metabolism	Metabolism of Other Amino Acids	Glutathione S-transferase	Posttranslational modification, protein turnover, chaperones
11535	1294624	NO	9.51	6.97	2.54	0.0112973	11.17	7.86	3.31	9.93991e-08	0	0	0	0	0	0		Immunoglobulin E-set | Glyoxal oxidase, N-terminal | Region of unknown function DUF1929 | Galactose oxidase/kelch, beta-propeller | TonB box, conserved site
11534	820911	NO	8.68	7.6	1.08	1	9.72	8.2	1.52	1	0	0	0	0	0	0
11533	37983	YES	8.23	7.63	0.6	1	10.27	7.52	2.75	0.00366693	0	0	0	0	0	0								Uncharacterized conserved protein	Function unknown
11681	1457807	NO	12.71	9.53	3.18	7.06795e-12	11.87	10.46	1.41	1	0	0	0	0	2	0	iron ion binding | monooxygenase activity | electron transport | heme binding | unspecific monooxygenase activity	Cytochrome P450 | Cytochrome P450, E-class, group I	1.14.14.1	Unspecific monooxygenase,	RH + reduced flavoprotein + O(2) = ROH + oxidized flavoprotein + H(2)O,	Tryptophan metabolism	Amino Acid Metabolism	Cytochrome P450 CYP4/CYP19/CYP26 subfamilies | Cytochrome P450 CYP4/CYP19/CYP26 subfamilies	Lipid transport and metabolism
11531	1502462	NO	8.83	7.96	0.87	1	10.16	7.75	2.41	0.058644	3	0	2	5	6	0	hydrolase activity | metabolic process | carboxylesterase activity	Carboxylesterase, type B | Lipase, GDXG, active site	3.1.1.1	Carboxylesterase,	A carboxylic ester + H(2)O = an alcohol + a carboxylic anion,			Carboxylesterase and related proteins	General function prediction only
11530	1483515	NO	8.43	7.6	0.83	1	10.38	7.85	2.53	0.0457331	0	0	0	0	0	0		Protein of unknown function DUF1295						Predicted steroid reductase	General function prediction only
11529	1451645	NO	8.45	7.71	0.74	1	9.67	7.55	2.12	1	0	0	0	0	0	0	integral to membrane | GPI anchor biosynthetic process | phosphatidylinositol N-acetylglucosaminyltransferase activity	N-acetylglucosaminyl transferase component						N-acetylglucosaminyltransferase complex, subunit PIG-Q/GPI1, required for phosphatidylinositol biosynthesis | N-acetylglucosaminyltransferase complex, subunit PIG-Q/GPI1, required for phosphatidylinositol biosynthesis	Cell wall/membrane/envelope biogenesis
11528	1439507	YES	8.01	7.35	0.66	1	10.05	7.97	2.08	1	0	0	0	0	0	0
11527	1429088	YES	8.82	8	0.82	1	9.7	7.8	1.9	1	0	0	0	0	0	0
11526	1425886	NO	8.77	7.61	1.17	1	10	7.84	2.16	1	0	0	0	0	0	0
11525	844619	NO	9.33	7.83	1.5	1	10.5	8.04	2.46	0.181244	0	0	0	0	5	0		Thioredoxin-like fold | Glutathione S-transferase, C-terminal | Glutathione S-transferase, C-terminal-like
11524	717300	NO	9.44	7.96	1.48	1	9.95	8.18	1.77	1	0	0	0	0	0	0
11523	1587005	NO	9.16	8	1.15	1	10.28	7.86	2.42	0.158731	0	0	0	0	0	0		Dimeric alpha-beta barrel
11522	1499216	NO	9.79	7.21	2.59	9.08452e-05	10.03	8.04	1.99	1	0	0	0	0	0	0	binding | transport | membrane | transporter activity | amino acid transport | amino acid transmembrane transporter activity	Lipocalin | Amino acid permease-associated region | Amino acid/polyamine transporter I						Amino acid transporters	Amino acid transport and metabolism
11521	1455229	NO	9.51	7.61	1.89	1	9.72	7.95	1.77	1	0	0	0	0	0	0
11520	1452552	YES	9.45	7.73	1.72	1	10.22	7.59	2.63	9.16575e-06	0	0	0	0	0	0		Pectate lyase/Amb allergen | Pectin lyase fold/virulence factor
11519	1448622	NO	9.47	7.76	1.71	1	9.7	8.12	1.59	1	0	0	0	0	0	0		MFS general substrate transporter | Major facilitator superfamily MFS-1						Predicted sugar transporter	Carbohydrate transport and metabolism
11518	1444842	NO	9.2	7.77	1.43	1	9.75	8.06	1.69	1	0	0	6	0	14	0	binding | catalytic activity | metabolic process | cellular metabolic process | coenzyme binding	NAD(P)-binding | NAD-dependent epimerase/dehydratase						Predicted dehydrogenase	Carbohydrate transport and metabolism
11517	1409466	NO	9.12	7.62	1.5	1	10.28	7.94	2.34	1	0	0	5	0	4	0	oxidoreductase activity | C-3 sterol dehydrogenase (C-4 sterol decarboxylase) activity | 3-keto sterol reductase activity | aldo-keto reductase activity | isocitrate dehydrogenase activity | mevaldate reductase activity | gluconate dehydrogenase activity | steroid dehydrogenase activity | epoxide dehydrogenase activity | 5-exo-hydroxycamphor dehydrogenase activity | 2-hydroxytetrahydrofuran dehyd…	Aldo/keto reductase	1.1.1.-	With NAD(+) or NADP(+) as acceptor,		Bile acid biosynthesis	Lipid Metabolism	Voltage-gated shaker-like K+ channel, subunit beta/KCNAB	Energy production and conversion
11516	1402741	NO	9.4	7.61	1.8	1	9.8	8.37	1.43	1	0	0	0	0	0	0	ATP binding | protein kinase activity | protein amino acid phosphorylation | protein-tyrosine kinase activity | protein serine/threonine kinase activity	Protein kinase-like | Protein kinase, core | Serine/threonine protein kinase-related | Tyrosine protein kinase | Serine/threonine protein kinase | Serine/threonine protein kinase, active site						Tyrosine kinase specific for activated (GTP-bound) p21cdc42Hs	Signal transduction mechanisms
11515	1396308	YES	9.64	7.72	1.92	1	10.04	7.78	2.27	1	38	0	22	23	13	34	FAD binding | oxidoreductase activity, acting on CH-OH group of donors | alcohol metabolic process | choline dehydrogenase activity	Glucose-methanol-choline oxidoreductase, N-terminal | Glucose-methanol-choline oxidoreductase, C-terminal | Glucose-methanol-choline oxidoreductase	1.1.99.1	Choline dehydrogenase,	Choline + acceptor = betaine aldehyde + reduced acceptor,	Glycine, serine and threonine metabolism	Amino Acid Metabolism	Glucose dehydrogenase/choline dehydrogenase/mandelonitrile lyase (GMC oxidoreductase family)	General function prediction only
11514	1385565	NO	9.37	7.16	2.21	0.420379	9.55	8.02	1.53	1	0	0	0	0	0	0	transport | transporter activity | integral to membrane	MFS general substrate transporter | Major facilitator superfamily MFS-1 | Major facilitator superfamily						Synaptic vesicle transporter SVOP and related transporters (major facilitator superfamily)	General function prediction only
11513	1296640	YES	9.61	7.83	1.78	1	9.58	7.71	1.87	1	0	0	18	0	23	15	hydrolase activity, hydrolyzing O-glycosyl compounds | carbohydrate metabolic process | beta-glucosidase activity	Glycoside hydrolase, family 3, N-terminal | Glycoside hydrolase, family 3, C-terminal | Glycoside hydrolase, catalytic core	3.2.1.21	Beta-glucosidase,	Hydrolysis of terminal, non-reducing beta-D-glucose residues with release of beta-D-glucose,	Starch and sucrose metabolism	Metabolism of Complex Carbohydrates
11512	1213420	YES	9.42	7.5	1.92	1	9.84	8.12	1.72	1	0	0	0	0	0	0
11511	1114465	NO	9.28	7.37	1.91	1	9.76	8.01	1.74	1	0	0	0	0	0	0	binding | catalytic activity | metabolic process | oxidoreductase activity	NAD(P)-binding | Glucose/ribitol dehydrogenase | Short-chain dehydrogenase/reductase SDR						Predicted short chain-type dehydrogenase	General function prediction only
11510	68507	YES	9.86	8.08	1.79	1	9.39	8.09	1.3	1	0	0	0	0	0	0	extracellular region	Allergen V5/Tpx-1 related | SCP-like extracellular						Defense-related protein containing SCP domain	Function unknown
11509	576387	NO	9.61	7.64	1.97	1	9.3	8.32	0.98	1	0	0	0	0	0	0
11508	547864	NO	10.08	7.84	2.24	1	9.61	7.89	1.72	1	0	0	0	0	0	0
11507	1485080	NO	9.65	7.57	2.08	1	9.42	8.14	1.28	1	0	0	0	0	0	0	hydrolase activity	Amidohydrolase 1
11506	1453030	NO	9.57	7.66	1.92	1	9.34	8.3	1.03	1	0	0	0	0	0	0	ATP binding | catalytic activity | metabolic process | ligase activity | biotin binding	Carbamoyl phosphate synthase, large subunit, N-terminal | Biotin/lipoyl attachment | Biotin carboxylase, C-terminal | Carbamoyl phosphate synthetase, large subunit, ATP-binding | ATP-grasp fold | Biotin carboxylation region | Single hybrid motif | Rudiment single hybrid motif | PreATP-grasp-like fold | Allophanate hydrolase subunit 2 | Allophanate hydrolase subunit 1						3-Methylcrotonyl-CoA carboxylase, biotin-containing subunit/Propionyl-CoA carboxylase, alpha chain/Acetyl-CoA carboxylase, biotin carboxylase subunit | 3-Methylcrotonyl-CoA carboxylase, biotin-containing subunit/Propionyl-CoA carboxylase, alpha chain/Acetyl-CoA carboxylase, biotin carboxylase subunit	Amino acid transport and metabolism
11505	1450751	NO	9.94	7.38	2.56	0.000522323	9.32	8.4	0.92	1	0	0	0	0	0	0	ATP binding | nucleotide binding | nucleoside-triphosphatase activity	AAA+ ATPase, core | AAA ATPase, core						AAA+-type ATPase	Posttranslational modification, protein turnover, chaperones
11504	1446680	NO	9.55	7.9	1.65	1	9.52	8.33	1.2	1	0	0	5	0	4	0	oxidoreductase activity | C-3 sterol dehydrogenase (C-4 sterol decarboxylase) activity | 3-keto sterol reductase activity | aldo-keto reductase activity | isocitrate dehydrogenase activity | mevaldate reductase activity | gluconate dehydrogenase activity | steroid dehydrogenase activity | epoxide dehydrogenase activity | 5-exo-hydroxycamphor dehydrogenase activity | 2-hydroxytetrahydrofuran dehyd…	Aldo/keto reductase	1.1.1.-	With NAD(+) or NADP(+) as acceptor,		Bile acid biosynthesis	Lipid Metabolism	Voltage-gated shaker-like K+ channel, subunit beta/KCNAB	Energy production and conversion
11503	1433325	NO	9.72	7.69	2.03	1	9.68	8.31	1.37	1	0	0	0	0	0	0
11502	1399204	NO	10.57	7	3.57	0.0586382	9.54	8.42	1.12	1	0	0	2	0	0	0	oxidoreductase activity | pyridoxine 4-dehydrogenase activity	Aldo/keto reductase	1.1.1.65	Pyridoxine 4-dehydrogenase,	Pyridoxine + NADP(+) = pyridoxal + NADPH,	Vitamin B6 metabolism	Metabolism of Cofactors and Vitamins	Voltage-gated shaker-like K+ channel, subunit beta/KCNAB	Energy production and conversion
11501	1387079	NO	10.17	7.66	2.51	0.887554	9.08	7.91	1.16	1	0	0	0	0	0	0
11500	1212717	NO	10.02	7.48	2.54	6.64401e-05	9.44	8.21	1.22	1	0	0	0	0	0	0	intracellular | zinc ion binding | nucleic acid binding	Zinc finger, C2H2-type						FOG: Zn-finger	General function prediction only
11499	996352	NO	10.1	8.1	2	1	9.65	9.47	0.18	1	0	0	0	0	0	0	membrane | phosphopantetheine binding	Protein of unknown function DUF6, transmembrane | Protein of unknown function DUF250 | Phosphopantetheine attachment site						Glucose-6-phosphate/phosphate and phosphoenolpyruvate/phosphate antiporter | Glucose-6-phosphate/phosphate and phosphoenolpyruvate/phosphate antiporter	Carbohydrate transport and metabolism
11498	333655	YES	9.95	7.77	2.18	0.633861	9.5	8.98	0.52	1	0	0	0	0	0	0
11497	1546720	NO	9.39	7.88	1.51	1	9.53	9.24	0.29	1	0	0	0	0	0	0								Myosin class II heavy chain	Cytoskeleton
11496	1508445	NO	10.36	8.17	2.19	0.461555	9.86	9.1	0.76	1	0	0	0	0	0	0	catalytic activity | metabolic process | 4-coumarate-CoA ligase activity	AMP-dependent synthetase and ligase	6.2.1.12	4-coumarate--CoA ligase,	ATP + 4-coumarate + CoA = AMP + diphosphate + 4-coumaroyl-CoA,	Flavonoids, stilbene and lignin biosynthesis	Biosynthesis of Secondary Metabolites	Acyl-CoA synthetase	Lipid transport and metabolism
11495	1504946	YES	10.42	7.58	2.85	7.20142e-08	9.94	9.16	0.78	1	6	4	11	8	13	35	FAD binding | oxidoreductase activity, acting on CH-OH group of donors | alcohol metabolic process | choline dehydrogenase activity	Glucose-methanol-choline oxidoreductase, N-terminal | Glucose-methanol-choline oxidoreductase, C-terminal | Glucose-methanol-choline oxidoreductase	1.1.99.1	Choline dehydrogenase,	Choline + acceptor = betaine aldehyde + reduced acceptor,	Glycine, serine and threonine metabolism	Amino Acid Metabolism	Glucose dehydrogenase/choline dehydrogenase/mandelonitrile lyase (GMC oxidoreductase family)	General function prediction only
11494	1480969	NO	9.96	7.95	2.01	1	10.13	9.12	1.01	1	0	0	0	0	0	0		MFS general substrate transporter
11493	1464453	NO	10.01	7.92	2.09	1	9.62	8.85	0.77	1	0	0	0	0	0	0
11492	1452209	NO	10.16	7.35	2.81	1.1387e-07	9.84	9.6	0.24	1	0	0	0	0	0	0	ATP binding | ATPase activity | nucleotide binding | nucleoside-triphosphatase activity	AAA+ ATPase, core | ABC transporter-like						ATPase component of ABC transporters with duplicated ATPase domains/Translation elongation factor EF-3b | ATPase component of ABC transporters with duplicated ATPase domains/Translation elongation factor EF-3b	Translation, ribosomal structure and biogenesis
11491	1450754	NO	9.81	7.95	1.87	1	9.45	9.29	0.17	1	0	0	0	0	0	0		Acyl-CoA N-acyltransferase						Nucleolar GTPase/ATPase p130	Nuclear structure
11490	1450363	NO	9.59	7.63	1.96	1	9.39	9.12	0.28	1	0	0	0	0	0	0		UBX						Predicted ubiquitin regulatory protein	Posttranslational modification, protein turnover, chaperones
11489	1450082	NO	9.99	7.76	2.22	0.550885	9.57	8.91	0.66	1	0	0	0	0	0	0	signal transduction | signal transducer activity	PAS | PAS fold-3						Alternative splicing factor ASF/SF2 (RRM superfamily)	RNA processing and modification
11488	1448422	NO	9.46	8.02	1.44	1	9.71	9.02	0.69	1	0	0	0	0	0	0
11487	1443874	NO	10.1	7.58	2.52	0.000334825	9.71	9.21	0.5	1	0	0	0	0	0	0	iron ion binding | monooxygenase activity | electron transport | heme binding | leukotriene-B4 20-monooxygenase activity	Cytochrome P450, E-class, group IV | Cytochrome P450	1.14.13.30	Leukotriene-B4 20-monooxygenase,	(6Z,8E,10E,14Z)-(5S,12R)-5,12-dihydroxyicosa-6,8,10,14-tetraenoate + NADPH + O(2) = (6Z,8E,10E,14Z)-(5S,12R)-5,12,20-trihydroxyicosa- 6,8,10,14-tetraenoate + NADP(+) + H(2)O,	Prostaglandin and leukotriene metabolism	Metabolism of Complex Lipids	Cytochrome P450 CYP4/CYP19/CYP26 subfamilies | Cytochrome P450 CYP4/CYP19/CYP26 subfamilies	Lipid transport and metabolism
11486	1441214	NO	10.06	8.03	2.04	1	9.48	8.86	0.62	1	0	0	0	0	0	0	ATP binding | nucleotide binding | nucleoside-triphosphatase activity	AAA+ ATPase, core | AAA ATPase, core						AAA+-type ATPase	Posttranslational modification, protein turnover, chaperones
11485	1439328	NO	9.78	8.14	1.64	1	9.22	9.25	-0.04	1	0	0	0	0	0	0	ATP binding | nucleotide binding | nucleoside-triphosphatase activity	AAA+ ATPase, core | AAA ATPase, core | BCS1 N terminal						AAA+-type ATPase	Posttranslational modification, protein turnover, chaperones
11484	1381476	NO	10.06	7.87	2.19	1	10.14	9.13	1.02	1	0	0	0	0	0	0	binding | catalytic activity | metabolic process	NAD(P)-binding
11483	1216481	YES	9.54	7.8	1.74	1	9.39	8.88	0.51	1	0	0	0	0	0	0
11482	1023206	YES	9.82	8.13	1.69	1	9.49	8.9	0.59	1	0	0	0	0	0	0
11481	824167	NO	9.88	8.31	1.58	1	10.31	8.65	1.65	1	0	0	0	0	0	0	6-aminohexanoate transaminase activity | N2-acetyl-L-lysine aminotransferase activity | acetyldiaminopimelate aminotransferase activity | branched-chain amino acid:2-keto-4-methylthiobutyrate aminotransferase activity | aspartate-2-keto-4-methylthiobutyrate transaminase activity	Pyridoxal phosphate-dependent transferase, major region	2.6.1.-	Transaminases (aminotransferases),		Lysine biosynthesis	Amino Acid Metabolism	Aromatic amino acid aminotransferase and related proteins	Amino acid transport and metabolism
11480	352460	NO	9.68	8.65	1.03	1	10.16	8.37	1.79	1	0	0	0	0	0	0	transport | transporter activity | integral to membrane	MFS general substrate transporter | Major facilitator superfamily MFS-1 | Major facilitator superfamily						Permease of the major facilitator superfamily	Carbohydrate transport and metabolism
11479	1593083	NO	9.96	8.36	1.6	1	9.81	8.9	0.91	1	0	0	0	0	0	0
11478	1511725	NO	9.9	8.3	1.6	1	10.32	8.68	1.63	1	0	0	0	0	0	0	intracellular | GTP binding	GTP-binding protein, HSR1-related
11477	1496445	NO	9.79	8.54	1.25	1	9.82	8.65	1.17	1	0	0	0	0	0	0
11476	1485081	NO	9.7	8.12	1.59	1	10.47	8.52	1.95	1	0	0	0	0	0	0	ATP binding | dephospho-CoA kinase activity	Dephospho-CoA kinase	2.7.1.24	Dephospho-CoA kinase,	ATP + dephospho-CoA = ADP + CoA,	Pantothenate and CoA biosynthesis	Metabolism of Cofactors and Vitamins	Similar to bacterial dephospho-CoA kinase	Coenzyme transport and metabolism
11475	1481048	NO	9.87	8.35	1.52	1	9.89	8.97	0.92	1	0	0	0	0	0	0	carbohydrate metabolic process | D-ribulokinase activity	Carbohydrate kinase, FGGY | Pentulose kinase	2.7.1.47	D-ribulokinase,	ATP + D-ribulose = ADP + D-ribulose 5-phosphate,	Pentose and glucuronate interconversions	Carbohydrate Metabolism	Ribulose kinase and related carbohydrate kinases	Carbohydrate transport and metabolism
11474	1470117	YES	10.05	8.47	1.58	1	10.23	8.64	1.59	1	0	0	0	0	0	0
11473	1450586	NO	10.12	8.33	1.78	1	9.97	8.71	1.27	1	0	0	3	0	0	0	nucleic acid binding | hydrolase activity, acting on ester bonds | endonuclease activity | DNA catabolic process	Phospholipase C/P1 nuclease, core | S1/P1 nuclease
11472	1443664	NO	9.95	8.61	1.34	1	9.8	8.73	1.07	1	0	0	8	0	10	0	transferase activity, transferring pentosyl groups | S-methyl-5-thioadenosine phosphorylase activity	Purine phosphorylase, family 2 | Methylthioadenosine phosphorylase	2.4.2.28	5'-methylthioadenosine phosphorylase,	5'-methylthioadenosine + phosphate = adenine + 5-methylthio-D- ribose 1-phosphate,			Methylthioadenosine phosphorylase MTAP	Nucleotide transport and metabolism
11471	1441611	NO	9.59	8.27	1.33	1	10.02	8.93	1.09	1	0	0	0	0	0	0
11470	1439647	NO	9.85	8.32	1.54	1	9.91	8.38	1.53	1	0	0	0	0	0	0
11469	1385581	NO	9.57	8.23	1.35	1	10.08	8.56	1.51	1	0	0	0	0	0	0	integral to membrane | iron ion binding | electron transport | oxidoreductase activity | FAD binding | ferric-chelate reductase activity	Ferric reductase-like transmembrane component, N-terminal | FAD-binding 8 | Ferric reductase, NAD binding						Ferric reductase, NADH/NADPH oxidase and related proteins | Ferric reductase, NADH/NADPH oxidase and related proteins	Secondary metabolites biosynthesis, transport and catabolism
9850	1432406	NO	9.31	6.61	2.7	7.12521e-05	8.68	9.04	-0.36	1	0	0	0	0	0	0	metabolic process | oxidoreductase activity | squalene monooxygenase activity	FAD dependent oxidoreductase | Aromatic-ring hydroxylase | Squalene epoxidase	1.14.99.7	Squalene monooxygenase,	Squalene + AH(2) + O(2) = (S)-squalene-2,3-epoxide + A + H(2)O,	Terpenoid biosynthesis	Biosynthesis of Secondary Metabolites	Squalene monooxygenase	Lipid transport and metabolism
11467	10265	NO	10.15	8.48	1.67	1	9.95	8.78	1.16	1	0	0	0	0	0	0		MFS general substrate transporter						beta-1,6-N-acetylglucosaminyltransferase, contains WSC domain | beta-1,6-N-acetylglucosaminyltransferase, contains WSC domain	Carbohydrate transport and metabolism
11466	98599	NO	10.23	8.74	1.49	1	9.55	9.34	0.21	1	0	0	0	0	0	0	membrane | catalytic activity | oxidoreductase activity | FAD binding | D-arabinono-1,4-lactone oxidase activity | L-gulonolactone oxidase activity	FAD linked oxidase, N-terminal | D-arabinono-1,4-lactone oxidase | FAD-binding, type 2	1.1.3.8	L-gulonolactone oxidase,	L-gulono-1,4-lactone + O(2) = L-xylo-hexulonolactone + H(2)O(2),	Ascorbate and aldarate metabolism	Carbohydrate Metabolism	D-arabinono-1, 4-lactone oxidase	Defense mechanisms
11465	587956	NO	10.56	8.72	1.84	1	9.76	9.01	0.74	1	0	0	3	5	11	0	hydrolase activity, hydrolyzing O-glycosyl compounds | carbohydrate metabolic process | alpha-glucosidase activity	Glycoside hydrolase, catalytic core | Glycoside hydrolase, family 31	3.2.1.20	Alpha-glucosidase,	Hydrolysis of terminal, non-reducing 1,4-linked D-glucose residues with release of D-glucose,	Galactose metabolism	Carbohydrate Metabolism	Glucosidase II catalytic (alpha) subunit and related enzymes, glycosyl hydrolase family 31 | Glucosidase II catalytic (alpha) subunit and related enzymes, glycosyl hydrolase family 31 | Glucosidase II catalytic (alpha) subunit and related enzymes, glycosyl hydrolase family 31	Carbohydrate transport and metabolism
11464	475339	NO	10.17	8.76	1.41	1	9.88	9.26	0.62	1	0	0	0	0	0	0								von Willebrand factor and related coagulation proteins | von Willebrand factor and related coagulation proteins	Extracellular structures
11463	231515	NO	10.08	8.3	1.78	1	9.92	9.19	0.73	1	0	0	0	0	0	0
11462	1588977	NO	9.89	8.59	1.3	1	9.78	9.18	0.6	1	0	0	0	0	0	0	transport | membrane | neuropeptide hormone activity | neuropeptide signaling pathway | amino acid transport | amino acid transmembrane transporter activity	Amino acid permease-associated region | Amino acid/polyamine transporter I | Pyrokinin, conserved site						Amino acid transporters	Amino acid transport and metabolism
11461	1588913	YES	10.12	8.72	1.4	1	9.76	8.83	0.93	1	0	0	0	0	0	0	nucleic acid binding | methyltransferase activity | methylation	N-6 adenine-specific DNA methylase, conserved site
11460	1567850	NO	10.13	8.62	1.5	1	10.02	9.06	0.96	1	0	0	0	0	0	0	binding | catalytic activity | metabolic process | cofactor binding	AMP-dependent synthetase and ligase | NAD(P)-binding | Phosphopantetheine-binding | Acyl carrier protein-like | Male sterility, NAD-binding						Non-ribosomal peptide synthetase/alpha-aminoadipate reductase and related enzymes	Secondary metabolites biosynthesis, transport and catabolism
11459	1561246	NO	9.95	8.75	1.19	1	9.75	8.94	0.82	1	8	0	0	5	0	0	hydrolase activity, hydrolyzing O-glycosyl compounds | carbohydrate metabolic process | beta-glucosidase activity	Glycoside hydrolase, family 3, N-terminal | Glycoside hydrolase, family 3, C-terminal | Glycoside hydrolase, catalytic core	3.2.1.21	Beta-glucosidase,	Hydrolysis of terminal, non-reducing beta-D-glucose residues with release of beta-D-glucose,	Starch and sucrose metabolism	Metabolism of Complex Carbohydrates
11458	1503969	NO	10.11	8.8	1.31	1	9.65	9.36	0.29	1	0	0	0	0	0	0	zinc ion binding | nucleic acid binding | enzyme inhibitor activity	Zinc finger, CCCH-type | Proteinase inhibitor I14/I15, hirudin/antistatin						Splicing coactivator SRm160/300, subunit SRm300	RNA processing and modification
11457	1449970	NO	10.1	8.81	1.29	1	9.35	9.09	0.26	1	0	0	0	0	0	0	aromatic compound metabolic process | metabolic process | monooxygenase activity | electron transport | oxidoreductase activity | salicylate 1-monooxygenase activity	Aromatic-ring hydroxylase | Monooxygenase, FAD-binding	1.14.13.1	Salicylate 1-monooxygenase,	Salicylate + NADH + O(2) = catechol + NAD(+) + H(2)O + CO(2),	Fluorene degradation	Biodegradation of Xenobiotics	Kynurenine 3-monooxygenase and related flavoprotein monooxygenases | Kynurenine 3-monooxygenase and related flavoprotein monooxygenases	Energy production and conversion
11456	1449158	NO	10.03	8.93	1.1	1	9.59	9.31	0.29	1	0	0	0	0	0	0	lipid metabolic process | signal transduction | calcium ion binding | intracellular signaling cascade | phospholipase C activity | phosphoinositide phospholipase C activity	Calcium-binding EF-hand | C2 calcium-dependent membrane targeting | C2 calcium/lipid-binding region, CaLB | Phospholipase C, phosphatidylinositol-specific , X region | Phospholipase C, phosphatidylinositol-specific , X and Y boxes | Phospholipase C, phosphoinositol-specific, C-terminal (PLC) | Phospholipase C, phosphatidylinositol-specific, Y domain	3.1.4.11	1-phosphatidylinositol-4,5-bisphosphate phosphodiesterase,	1-phosphatidyl-1D-myo-inositol 4,5-bisphosphate + H(2)O = D-myo- inositol 1,4,5-trisphosphate + diacylglycerol,	Inositol phosphate metabolism	Metabolism of Complex Lipids	Phosphoinositide-specific phospholipase C	Signal transduction mechanisms
11455	1448833	NO	10.12	8.76	1.36	1	9.93	9.11	0.83	1	0	0	0	0	0	0
11454	1443109	NO	10.02	8.77	1.25	1	9.85	9.07	0.77	1	0	0	0	0	0	0	exo-alpha-sialidase activity		3.2.1.18	Exo-alpha-sialidase,	Hydrolysis of alpha-(2->3)-, alpha-(2->6)-, alpha-(2->8)-glycosidic linkages of terminal sialic residues in oligosaccharides, glycoproteins, glycolipids, colominic acid and synthetic substrates,	N-Glycan degradation	Metabolism of Complex Carbohydrates	Chitinase	Carbohydrate transport and metabolism
11453	1441201	YES	10.1	8.88	1.21	1	10.07	9.13	0.93	1	0	0	0	0	0	0
11452	1439798	NO	10.1	8.59	1.51	1	10.16	9.13	1.03	1	0	0	0	0	0	0
11451	1437553	NO	10.04	9	1.04	1	9.74	9.27	0.47	1	0	0	0	0	0	0	cation transport | cation transmembrane transporter activity	Cation transporter						Na+/K+ transporter	Inorganic ion transport and metabolism
11450	1182000	NO	10.55	8.55	2.01	1	10.05	9.23	0.83	1	0	0	0	0	0	0	nucleus | transcription regulator activity | regulation of transcription	Basic helix-loop-helix dimerisation region bHLH | Helix-loop-helix DNA-binding
11449	1014842	NO	9.84	8.71	1.13	1	9.85	9.27	0.58	1	0	0	0	0	0	0								FOG: Low-complexity	Function unknown
11448	319386	NO	10.61	9.78	0.83	1	10.49	8.37	2.12	1	0	0	0	0	3	0	FAD binding | oxidoreductase activity, acting on CH-OH group of donors | alcohol metabolic process | choline dehydrogenase activity	Glucose-methanol-choline oxidoreductase, N-terminal | Glucose-methanol-choline oxidoreductase, C-terminal | Glucose-methanol-choline oxidoreductase	1.1.99.1	Choline dehydrogenase,	Choline + acceptor = betaine aldehyde + reduced acceptor,	Glycine, serine and threonine metabolism	Amino Acid Metabolism	Glucose dehydrogenase/choline dehydrogenase/mandelonitrile lyase (GMC oxidoreductase family)	General function prediction only
11447	1532976	NO	10.16	9.4	0.76	1	10.45	8.63	1.82	1	0	0	0	0	0	0		Carbohydrate/purine kinase						Ribokinase	Carbohydrate transport and metabolism
11446	1506568	NO	10.57	9.58	0.99	1	10.42	8.25	2.18	1	0	0	0	0	0	0	transport | transporter activity | integral to membrane | response to antibiotic | tetracycline:hydrogen antiporter activity | tetracycline transport	MFS general substrate transporter | Major facilitator superfamily MFS-1 | Major facilitator superfamily | Tetracycline resistance protein, TetA						Permease of the major facilitator superfamily	General function prediction only
11445	1480054	YES	10.98	10.2	0.78	1	10.45	8.74	1.7	1	2	0	6	3	10	0	proteolysis | serine-type peptidase activity	Peptidase S41
11444	1449244	YES	10.61	9.56	1.04	1	9.95	8.95	0.99	1	8	0	6	9	8	6	hydrolase activity | hydrolase activity, acting on ester bonds | nucleotide catabolic process	Metallophosphoesterase | Predicted phosphoesterase, C1039.02 type | 5'-Nucleotidase, conserved site						5' nucleotidase	Nucleotide transport and metabolism
11443	1446758	NO	10.3	9.71	0.59	1	10.16	8.82	1.34	1	0	0	0	0	0	0	catalytic activity | DNA-directed DNA polymerase activity | galactose metabolic process | telomerase activity | RNA helicase activity | DNA primase activity | sulfate adenylyltransferase activity | RNA guanylyltransferase activity | tRNA guanylyltransferase activity | mannose-phosphate guanylyltransferase activity | DNA/RNA helicase activity | CTP:2,3-di-O-geranylgeranyl-sn-glycero-1-phosphate cy…	Histidine triad-like motif | Galactose-1-phosphate uridyl transferase, class I | Galactose-1-phosphate uridyl transferase, N-terminal | Galactose-1-phosphate uridyl transferase, C-terminal	2.7.7.-	Nucleotidyltransferases,		DNA polymerase	REPLICATION AND REPAIR	Galactose-1-phosphate uridylyltransferase	Energy production and conversion
11442	1426021	YES	10.13	9.5	0.63	1	10.15	8.45	1.7	1	4	0	3	3	4	9	RNA binding | endoribonuclease activity | ribonuclease T2 activity	Ribonuclease T2	3.1.27.1	Ribonuclease T2,	Two-stage endonucleolytic cleavage to 3'-phosphomononucleotides and 3'-phosphooligonucleotides with 2',3'-cyclic phosphate interMEANtes,			Ribonuclease, T2 family	RNA processing and modification
11441	1404685	YES	11.3	9.66	1.64	1	10.08	8.44	1.64	1	0	0	0	0	0	0
11440	1402720	NO	10.3	9.59	0.71	1	9.97	8.69	1.28	1	0	0	0	0	0	0	ATP binding	Heat shock protein 70 | Heat shock protein Hsp70						Molecular chaperones HSP70/HSC70, HSP70 superfamily	Posttranslational modification, protein turnover, chaperones
11677	1450244	NO	12.2	11.03	1.17	1	14.1	9.26	4.84	4.42579e-44	0	0	0	0	6	0	iron ion binding | monooxygenase activity | electron transport | heme binding | leukotriene-B4 20-monooxygenase activity	Cytochrome P450 | Cytochrome P450, E-class, group I	1.14.13.30	Leukotriene-B4 20-monooxygenase,	(6Z,8E,10E,14Z)-(5S,12R)-5,12-dihydroxyicosa-6,8,10,14-tetraenoate + NADPH + O(2) = (6Z,8E,10E,14Z)-(5S,12R)-5,12,20-trihydroxyicosa- 6,8,10,14-tetraenoate + NADP(+) + H(2)O,	Prostaglandin and leukotriene metabolism	Metabolism of Complex Lipids	Cytochrome P450 CYP4/CYP19/CYP26 subfamilies | Cytochrome P450 CYP4/CYP19/CYP26 subfamilies	Lipid transport and metabolism
11438	779628	NO	9.87	9.65	0.21	1	10.31	9.34	0.97	1	0	0	0	0	0	0
11437	1510352	YES	10.11	9.8	0.32	1	10.47	9.13	1.33	1	0	0	0	0	0	0								Actin regulatory protein (Wiskott-Aldrich syndrome protein) | Actin regulatory protein (Wiskott-Aldrich syndrome protein)	Signal transduction mechanisms
11436	1453997	NO	9.68	9.57	0.12	1	10.57	9.21	1.36	1	0	0	4	0	11	0	carbohydrate metabolic process | lactoylglutathione lyase activity	Glyoxalase/bleomycin resistance protein/dioxygenase | Glyoxalase I	4.4.1.5	Lactoylglutathione lyase,	(R)-S-lactoylglutathione = glutathione + methylglyoxal,	Pyruvate metabolism	Carbohydrate Metabolism	Glyoxalase	Carbohydrate transport and metabolism
11435	1453485	NO	10.22	9.87	0.35	1	10.62	9.39	1.23	1	0	0	0	0	0	0
11434	1449323	NO	10.02	9.47	0.56	1	10.63	8.91	1.73	1	0	0	0	0	0	0
11433	1444058	NO	9.9	9.69	0.2	1	10.21	9.2	1	1	0	0	0	0	0	0	binding | catalytic activity | metabolic process	NAD(P)-binding
11432	1442851	NO	10.04	9.72	0.32	1	10.28	9.32	0.96	1	0	0	0	0	2	0	binding | catalytic activity | metabolic process | NAD binding | cytoplasm | protein dimerization activity | amino acid metabolic process | amino acid biosynthetic process | methionine biosynthetic process | NADP binding | oxidoreductase activity, acting on the aldehyde or oxo group of donors, NAD or NADP as acceptor | aspartate-semialdehyde dehydrogenase activity | threonine biosynthetic process	NAD(P)-binding | Semialdehyde dehydrogenase, NAD-binding | Semialdehyde dehydrogenase, dimerisation region | Aspartate-semialdehyde dehydrogenase | Aspartate-semialdehyde dehydrogenase, peptidoglycan lacking | Aspartate-semialdehyde dehydrogenase, conserved site	1.2.1.11	Aspartate-semialdehyde dehydrogenase,	L-aspartate-4-semialdehyde + phosphate + NADP(+) = L-4-aspartyl phosphate + NADPH,	Glycine, serine and threonine metabolism	Amino Acid Metabolism	Aspartate-semialdehyde dehydrogenase	Amino acid transport and metabolism
11693	1483163	NO	10.37	9.13	1.24	1	11.41	9.08	2.34	0.0253858	0	0	0	0	0	0	iron ion binding | monooxygenase activity | electron transport | heme binding | leukotriene-B4 20-monooxygenase activity	Cytochrome P450, E-class, group IV | Cytochrome P450	1.14.13.30	Leukotriene-B4 20-monooxygenase,	(6Z,8E,10E,14Z)-(5S,12R)-5,12-dihydroxyicosa-6,8,10,14-tetraenoate + NADPH + O(2) = (6Z,8E,10E,14Z)-(5S,12R)-5,12,20-trihydroxyicosa- 6,8,10,14-tetraenoate + NADP(+) + H(2)O,	Prostaglandin and leukotriene metabolism	Metabolism of Complex Lipids	Cytochrome P450 CYP4/CYP19/CYP26 subfamilies | Cytochrome P450 CYP4/CYP19/CYP26 subfamilies	Lipid transport and metabolism
11430	1395419	NO	9.83	9.75	0.08	1	10.64	9.16	1.48	1	0	0	0	0	0	0	carboxylesterase activity	Carboxylesterase, type B	3.1.1.1	Carboxylesterase,	A carboxylic ester + H(2)O = an alcohol + a carboxylic anion,			Carboxylesterase and related proteins	General function prediction only
11429	766031	NO	10.84	9.79	1.05	1	10.77	9.64	1.13	1	0	0	0	0	0	0		Protein of unknown function DUF1479
11428	625775	NO	11	9.58	1.42	1	11.2	9.79	1.42	1	0	0	0	0	0	0	ATP binding | phosphoenolpyruvate carboxykinase (ATP) activity | gluconeogenesis | phosphoenolpyruvate carboxykinase activity | purine nucleotide binding	Phosphoenolpyruvate carboxykinase, N-terminal | Phosphoenolpyruvate carboxykinase, ATP-utilising | Phosphoenolpyruvate carboxykinase (ATP), conserved site	4.1.1.49	Phosphoenolpyruvate carboxykinase (ATP),	ATP + oxaloacetate = ADP + phosphoenolpyruvate + CO(2),	Carbon fixation	Energy Metabolism
11427	1523410	NO	10.84	9.48	1.36	1	10.5	9.59	0.92	1	8	3	11	22	10	7
11426	1509879	YES	10.97	9.31	1.67	1	11	9.54	1.46	1	0	0	0	0	0	0		Immunoglobulin E-set | Carbohydrate-binding WSC | Carbohydrate-binding WSC, subgroup | Glyoxal oxidase, N-terminal | Region of unknown function DUF1929 | Galactose oxidase/kelch, beta-propeller						beta-1,6-N-acetylglucosaminyltransferase, contains WSC domain | beta-1,6-N-acetylglucosaminyltransferase, contains WSC domain	Carbohydrate transport and metabolism
11425	1507504	NO	10.68	9.59	1.09	1	10.62	9.55	1.07	1	0	0	0	0	0	0
11424	1500459	NO	11.01	9.48	1.53	1	10.78	9.31	1.47	1	0	0	0	0	0	10	hydrolase activity, hydrolyzing O-glycosyl compounds | carbohydrate metabolic process | glucan 1,3-beta-glucosidase activity	Glycoside hydrolase, catalytic core | Glycoside hydrolase, family 5	3.2.1.58	Glucan 1,3-beta-glucosidase,	Successive hydrolysis of beta-D-glucose units from the non-reducing ends of 1,3-beta-D-glucans, releasing alpha-glucose,	Starch and sucrose metabolism	Metabolism of Complex Carbohydrates
11423	1467774	NO	10.5	9.55	0.95	1	10.8	9.59	1.2	1	0	0	0	0	0	0		Dimeric alpha-beta barrel | YCII-related
11422	1458989	YES	10.64	9.05	1.58	1	11.26	9.57	1.69	1	0	0	3	0	11	0	catalytic activity	Six-hairpin glycosidase-like | Bacterial alpha-L-rhamnosidase
11421	1454241	NO	10.87	9.66	1.21	1	10.54	9.89	0.65	1	0	0	0	0	0	0
11420	1439992	NO	10.5	9.28	1.22	1	10.67	9.44	1.22	1	0	0	0	0	0	0
11419	1438457	NO	10.51	9.52	0.99	1	10.79	9.56	1.23	1	0	0	0	0	5	0	hydrolase activity | proteolysis | metallopeptidase activity | protein dimerization activity | Gly-X carboxypeptidase activity	ArgE/DapE/ACY1/CPG2/YscS, conserved site | Peptidase M20 | Peptidase M20, dimerisation | Peptidase M20, carboxypeptidase S	3.4.17.4	Gly-X carboxypeptidase,	Peptidylglycine + H(2)O = peptide + glycine,			Aminoacylase ACY1 and related metalloexopeptidases	Amino acid transport and metabolism
11418	1437587	YES	10.7	9.49	1.21	1	10.77	9.73	1.05	1	0	0	0	0	0	0								SWI-SNF chromatin-remodeling complex protein	Chromatin structure and dynamics
11417	1409247	NO	10.43	9.59	0.84	1	10.89	9.67	1.23	1	0	0	0	0	0	0	binding | transport | membrane | mitochondrial inner membrane	Mitochondrial substrate carrier | Mitochondrial carrier protein						Mitochondrial carnitine-acylcarnitine carrier protein	Energy production and conversion
11416	1394798	YES	10.73	9.7	1.02	1	10.78	10.05	0.73	1	0	0	0	0	0	0	proteolysis | pepsin A activity | aspartic-type endopeptidase activity	Peptidase A1 | Peptidase aspartic, catalytic	3.4.23.1	Pepsin A,	Preferential cleavage: hydrophobic, preferably aromatic, residues in P1 and P1' positions, Cleaves 1-Phe-|-Val-2, 4-Gln-|-His-5, 13-Glu-|- Ala-14, 14-Ala-|-Leu-15, 15-Leu-|-Tyr-16, 16-Tyr-|-Leu-17, 23-Gly-|- Phe-24, 24-Phe-|-Phe-25 and 25-Phe-|-Tyr-26 bon			Aspartyl protease	Posttranslational modification, protein turnover, chaperones
11415	1393660	YES	10.7	9.44	1.25	1	10.74	9.95	0.79	1	0	0	7	0	8	0
11414	1382926	NO	10.51	9.55	0.96	1	11.31	9.55	1.76	1	0	0	0	0	0	0
11413	232149	NO	11.25	8.07	3.18	1.27312e-25	11.3	10	1.3	1	0	0	0	0	0	0
11412	1588488	NO	11.54	8.67	2.87	0.808306	11.79	10.79	1	1	0	0	0	0	0	0
11411	1520164	YES	10.83	9.32	1.51	1	11.33	10.22	1.11	1	0	0	0	0	0	4	proteolysis | pepsin A activity | aspartic-type endopeptidase activity	Peptidase A1 | Peptidase aspartic, active site | Peptidase aspartic, catalytic	3.4.23.1	Pepsin A,	Preferential cleavage: hydrophobic, preferably aromatic, residues in P1 and P1' positions, Cleaves 1-Phe-|-Val-2, 4-Gln-|-His-5, 13-Glu-|- Ala-14, 14-Ala-|-Leu-15, 15-Leu-|-Tyr-16, 16-Tyr-|-Leu-17, 23-Gly-|- Phe-24, 24-Phe-|-Phe-25 and 25-Phe-|-Tyr-26 bon			Aspartyl protease	Posttranslational modification, protein turnover, chaperones
11410	1441111	YES	11.14	9.22	1.92	1	11.5	10.36	1.14	1	9	0	7	5	9	3
11409	1439995	NO	10.54	8.77	1.77	1	11.23	10.93	0.3	1	0	0	0	0	0	0		Cytochrome b561 / ferric reductase transmembrane						Predicted membrane protein, contains DoH and Cytochrome b-561/ferric reductase transmembrane domains	Signal transduction mechanisms
11408	1006388	NO	11.05	8.72	2.33	0.0916833	11.07	10.56	0.52	1	0	0	0	0	0	0
6401	1448169	NO	9.29	9.13	0.16	1	9.94	7.67	2.27	0.0961402	0	0	0	0	2	0	binding | catalytic activity | metabolic process | methionine adenosyltransferase activity | methionine adenosyltransferase complex | methionine adenosyltransferase regulator activity | dTDP-4-dehydrorhamnose reductase activity | extracellular polysaccharide biosynthetic process	NAD(P)-binding | dTDP-4-dehydrorhamnose reductase	2.5.1.6	Methionine adenosyltransferase,	ATP + L-methionine + H(2)O = phosphate + diphosphate + S-adenosyl- L-methionine,	Selenoamino acid metabolism	Metabolism of Other Amino Acids	C-3 sterol dehydrogenase/3-beta-hydroxysteroid dehydrogenase and related dehydrogenases | C-3 sterol dehydrogenase/3-beta-hydroxysteroid dehydrogenase and related dehydrogenases	Lipid transport and metabolism
11406	595636	YES	11.46	8.84	2.62	0.522669	11.39	8.99	2.4	1	13	0	17	2	11	0	proteolysis | catalytic activity | subtilase activity | alpha,alpha-trehalase activity | trehalose metabolic process	Six-hairpin glycosidase-like | Glycoside hydrolase, family 37 | Peptidase S8 and S53, subtilisin, kexin, sedolisin	3.2.1.28	Alpha,alpha-trehalase,	Alpha,alpha-trehalose + H(2)O = 2 D-glucose,	Starch and sucrose metabolism	Metabolism of Complex Carbohydrates	Neutral trehalase	Carbohydrate transport and metabolism
11405	1576174	YES	11.17	9.76	1.41	1	11.71	9.97	1.74	1	0	0	14	0	6	11
11404	1521536	YES	11.81	9.44	2.37	0.038344	11.6	9.28	2.32	0.263668	32	5	30	13	44	42	oxidoreductase activity | copper ion binding | F420H2 dehydrogenase activity | sulfur oxygenase reductase activity | malolactic enzyme activity | regulation of oxidoreductase activity	Cupredoxin | Multicopper oxidase, type 1 | Multicopper oxidase, type 2 | Multicopper oxidase, type 3 | Multicopper oxidase, copper-binding site	1.-.-.-	Oxidoreductases,				Multicopper oxidases	Secondary metabolites biosynthesis, transport and catabolism
11403	1509956	NO	11.84	9.33	2.52	4.4865e-05	11.54	10.19	1.35	1	0	0	0	0	0	0	electron transport | oxidoreductase activity | FAD binding | flavin-containing monooxygenase activity	FAD-dependent pyridine nucleotide-disulphide oxidoreductase | Pyridine nucleotide-disulphide oxidoreductase, NAD-binding region | Pyridine nucleotide-disulphide oxidoreductase, class I	1.14.13.8	Dimethylaniline monooxygenase (N-oxide forming),	N,N-dimethylaniline + NADPH + O(2) = N,N-dimethylaniline N-oxide + NADP(+) + H(2)O,			Flavin-containing monooxygenase	Secondary metabolites biosynthesis, transport and catabolism
11402	1505843	YES	11.48	9.7	1.79	1	11.07	9.38	1.69	1	0	0	12	0	4	0		Neutral/alkaline nonlysosomal ceramidase						Ceramidases	Signal transduction mechanisms
11401	1482955	NO	11.45	9.26	2.2	1	11.76	9.43	2.34	1	0	0	5	0	9	0	oxidoreductase activity | pyridoxine 4-dehydrogenase activity	Aldo/keto reductase	1.1.1.65	Pyridoxine 4-dehydrogenase,	Pyridoxine + NADP(+) = pyridoxal + NADPH,	Vitamin B6 metabolism	Metabolism of Cofactors and Vitamins	Voltage-gated shaker-like K+ channel, subunit beta/KCNAB	Energy production and conversion
11532	1508517	NO	8.57	7.62	0.95	1	9.87	7.66	2.21	1	0	0	0	0	0	0	iron ion binding | monooxygenase activity | electron transport | heme binding | leukotriene-B4 20-monooxygenase activity	Cytochrome P450 | Cytochrome P450, E-class, group I	1.14.13.30	Leukotriene-B4 20-monooxygenase,	(6Z,8E,10E,14Z)-(5S,12R)-5,12-dihydroxyicosa-6,8,10,14-tetraenoate + NADPH + O(2) = (6Z,8E,10E,14Z)-(5S,12R)-5,12,20-trihydroxyicosa- 6,8,10,14-tetraenoate + NADP(+) + H(2)O,	Prostaglandin and leukotriene metabolism	Metabolism of Complex Lipids	Cytochrome P450 CYP4/CYP19/CYP26 subfamilies | Cytochrome P450 CYP4/CYP19/CYP26 subfamilies	Lipid transport and metabolism
11399	1479134	NO	11.19	9.34	1.85	1	11.61	9.06	2.54	0.00345611	0	0	6	0	10	0	oxidoreductase activity | D-xylose 1-dehydrogenase (NADP+) activity	Aldo/keto reductase	1.1.1.179	D-xylose 1-dehydrogenase (NADP+),	D-xylose + NADP(+) = D-xylono-1,5-lactone + NADPH,			Aldo/keto reductase family proteins	General function prediction only
11398	1458569	NO	11.3	9.24	2.05	1	11.64	9.86	1.78	1	0	0	0	0	0	0	transport | transporter activity | integral to membrane	MFS general substrate transporter | Major facilitator superfamily MFS-1 | Major facilitator superfamily						Permease of the major facilitator superfamily	Carbohydrate transport and metabolism
11397	1458097	YES	11.56	9.7	1.86	1	11.2	9.14	2.06	1	0	0	10	0	7	0	carboxylesterase activity	Carboxylesterase, type B	3.1.1.1	Carboxylesterase,	A carboxylic ester + H(2)O = an alcohol + a carboxylic anion,			Acetylcholinesterase/Butyrylcholinesterase	Signal transduction mechanisms
11396	1456798	NO	11.61	9.68	1.93	1	11.48	10.13	1.36	1	0	0	0	0	0	0
11395	1453900	YES	11.64	9.38	2.26	0.577664	11.67	10.08	1.58	1	4	0	0	0	0	0	proteolysis | pepsin A activity | aspartic-type endopeptidase activity | saccharopepsin activity	Peptidase A1 | Peptidase aspartic, active site | Peptidase aspartic, catalytic	3.4.23.25	Saccharopepsin,	Hydrolysis of proteins with broad specificity for peptide bonds, Cleaves -Leu-Leu-|-Val-Tyr- bond in a synthetic substrate, Does not act on esters of Tyr or Arg,			Aspartyl protease	Posttranslational modification, protein turnover, chaperones
11394	1450408	NO	11.44	9.52	1.92	1	11.62	9.63	1.99	1	0	0	0	0	0	0	intracellular | ATP binding | GTP binding | regulation of transcription, DNA-dependent | small GTPase MEANted signal transduction | protein transport | transcription factor binding	Ras GTPase | Ras | Ras small GTPase, Ras type | Ras small GTPase, Rho type | Ras small GTPase, Rab type | Small GTP-binding protein | RNA polymerase sigma factor 54, interaction						Ras-related GTPase	General function prediction only
11393	1448990	NO	11.16	9.73	1.44	1	11.2	9.69	1.51	1	0	0	0	0	0	0	ATP binding | protein kinase activity | protein amino acid phosphorylation | protein serine/threonine kinase activity	Protein kinase ATP binding, conserved site | Protein kinase-like | Protein kinase, core | Serine/threonine protein kinase-related | Serine/threonine protein kinase | Serine/threonine protein kinase, active site	2.7.1.37	Protein kinase,	ATP + a protein = ADP + a phosphoprotein,			Serine/threonine protein kinase	Signal transduction mechanisms
11392	1448595	NO	11.79	9.03	2.76	9.55858e-06	11.48	10.01	1.46	1	0	0	0	0	0	0	metabolic process | oxidoreductase activity	FAD-dependent pyridine nucleotide-disulphide oxidoreductase | Aromatic-ring hydroxylase
11391	1446144	YES	11.44	9.09	2.34	0.0112628	11.36	9.2	2.16	1	0	0	11	0	10	0	catalytic activity | oxidoreductase activity | FAD binding	FAD linked oxidase, N-terminal | FAD-binding, type 2						Proteins containing the FAD binding domain	Energy production and conversion
11390	1435780	NO	11.31	9.21	2.09	1	11.02	9.72	1.3	1	0	0	0	0	0	0	metabolic process	Pyridoxal phosphate-dependent transferase, major region | Aminotransferase, class V/Cysteine desulphurase						Cysteine desulfurase NFS1	Amino acid transport and metabolism
11389	1396467	NO	12.06	9.75	2.31	0.102318	11.04	9.4	1.63	1	0	0	0	0	0	0
11388	1394790	NO	11.35	9.57	1.78	1	11.73	9.78	1.94	1	0	0	0	0	0	0	G-protein coupled receptor protein signaling pathway | electron transport | signal transduction | signal transducer activity | guanyl nucleotide binding	G protein alpha subunit, helical insertion | Guanine nucleotide binding protein (G-protein), alpha subunit | Oxidoreductase, molybdopterin binding						G-protein alpha subunit (small G protein superfamily) | G-protein alpha subunit (small G protein superfamily)	Signal transduction mechanisms
11387	989391	NO	11.71	10.13	1.58	1	12.07	9.7	2.37	0.0150559	0	0	0	0	0	0	transport | membrane | ammonium transmembrane transporter activity	Rh-like protein/ammonium transporter | Ammonium transporter						Ammonia permease	Inorganic ion transport and metabolism
11386	728530	YES	12.07	9.95	2.12	1	12.54	10.09	2.46	0.0527171	0	0	5	0	12	4	carboxylesterase activity	Carboxylesterase, type B	3.1.1.1	Carboxylesterase,	A carboxylic ester + H(2)O = an alcohol + a carboxylic anion,			Acetylcholinesterase/Butyrylcholinesterase	Signal transduction mechanisms
11385	1563151	NO	11.71	9.8	1.91	1	11.82	9.76	2.07	1	0	0	0	0	0	0	oxidoreductase activity | C-3 sterol dehydrogenase (C-4 sterol decarboxylase) activity | 3-keto sterol reductase activity | aldo-keto reductase activity | isocitrate dehydrogenase activity | mevaldate reductase activity | gluconate dehydrogenase activity | steroid dehydrogenase activity | epoxide dehydrogenase activity | 5-exo-hydroxycamphor dehydrogenase activity | 2-hydroxytetrahydrofuran dehyd…	Aldo/keto reductase	1.1.1.-	With NAD(+) or NADP(+) as acceptor,		Bile acid biosynthesis	Lipid Metabolism	Aldo/keto reductase family proteins	General function prediction only
11384	1528306	YES	11.94	10.41	1.53	1	12.77	9.15	3.62	3.76325e-32	0	0	0	0	2	0	binding | intracellular | catalytic activity | metabolic process | structural constituent of ribosome | ribosome | translation | alcohol dehydrogenase activity | alcohol dehydrogenase activity, metal ion-independent | alcohol dehydrogenase activity, zinc-dependent | alcohol dehydrogenase activity, iron-dependent	NAD(P)-binding | Alcohol dehydrogenase, zinc-binding | Alcohol dehydrogenase GroES-like | GroES-like | Ribosomal protein S2	1.1.1.1	Alcohol dehydrogenase,	An alcohol + NAD(+) = an aldehyde or ketone + NADH,	Bile acid biosynthesis	Lipid Metabolism	Zinc-binding oxidoreductase | Zinc-binding oxidoreductase	Energy production and conversion
11383	1511706	NO	12.31	10.41	1.9	1	12.1	10.03	2.06	1	0	0	0	0	0	0	serine-type endopeptidase inhibitor activity	Protease inhibitor I4, serpin
3377	1458812	NO	6.9	7.89	-0.99	1	7.87	5.94	1.93	1	0	0	0	0	0	0	catalytic activity | metabolic process | C-4 methylsterol oxidase activity	Sterol desaturase						C-4 sterol methyl oxidase	Lipid transport and metabolism
11381	1501885	YES	12.52	10.69	1.82	1	11.5	9.72	1.78	1	0	0	0	0	0	0	zinc ion binding | carbonate dehydratase activity | carbon utilization	Carbonic anhydrase	4.2.1.1	Carbonate dehydratase,	H(2)CO(3) = CO(2) + H(2)O,	Nitrogen metabolism	Energy Metabolism	Predicted carbonic anhydrase involved in protection against oxidative damage	Inorganic ion transport and metabolism
11380	1482588	NO	11.79	10.26	1.53	1	12.37	10.11	2.26	0.0565217	0	0	2	0	12	0	integral to membrane | oxidoreductase activity | potassium ion transport | aryl-alcohol dehydrogenase (NADP+) activity	Aldo/keto reductase | Potassium channel, voltage-dependent, beta subunit, KCNAB-related	1.1.1.91	Aryl-alcohol dehydrogenase (NADP+),	An aromatic alcohol + NADP(+) = an aromatic aldehyde + NADPH,			Voltage-gated shaker-like K+ channel, subunit beta/KCNAB	Energy production and conversion
11379	1468742	NO	12.11	10.19	1.93	1	12.05	9.41	2.63	2.34067e-05	0	0	4	0	6	0	oxidoreductase activity | C-3 sterol dehydrogenase (C-4 sterol decarboxylase) activity | 3-keto sterol reductase activity | aldo-keto reductase activity | isocitrate dehydrogenase activity | mevaldate reductase activity | gluconate dehydrogenase activity | steroid dehydrogenase activity | epoxide dehydrogenase activity | 5-exo-hydroxycamphor dehydrogenase activity | 2-hydroxytetrahydrofuran dehyd…	Aldo/keto reductase	1.1.1.-	With NAD(+) or NADP(+) as acceptor,		Bile acid biosynthesis	Lipid Metabolism	Aldo/keto reductase family proteins	General function prediction only
11378	1450899	NO	11.79	9.94	1.85	1	12.11	10.13	1.98	1	0	0	0	0	0	0	transport | membrane | ATP binding | integral to membrane | catalytic activity | metabolic process | cation transport | ATPase activity, coupled to transmembrane movement of ions, phosphorylative mechanism | hydrolase activity, acting on acid anhydrides, catalyzing transmembrane movement of substances | calcium-transporting ATPase activity	Haloacid dehalogenase-like hydrolase | ATPase, P-type, K/Mg/Cd/Cu/Zn/Na/Ca/Na/H-transporter | E1-E2 ATPase-associated region | ATPase, P-type cation-transporter, C-terminal | ATPase, P-type cation-transporter, N-terminal | Potassium/sodium efflux P-type ATPase, fungal-type	3.6.3.8	Calcium-transporting ATPase,	ATP + H(2)O + Ca(2+)(Cis) = ADP + phosphate + Ca(2+)(Trans),			Ca2+ transporting ATPase	Inorganic ion transport and metabolism
11377	1449921	YES	11.63	10.35	1.27	1	11.8	9.2	2.6	4.0816e-07	0	0	6	2	8	10	catalytic activity	Six-hairpin glycosidase-like | Uncharacterised conserved protein UCP007663
11376	1441415	NO	11.71	10.1	1.61	1	11.72	9.15	2.57	8.27236e-05	0	0	6	0	14	0	binding | catalytic activity | metabolic process | oxidoreductase activity	NAD(P)-binding | Oxidoreductase, N-terminal						Predicted oxidoreductase	General function prediction only
11375	1440679	NO	12.12	10.46	1.65	1	11.68	9.59	2.09	1	0	0	0	0	0	0		MFS general substrate transporter | Major facilitator superfamily MFS-1						Permease of the major facilitator superfamily	Carbohydrate transport and metabolism
11374	1426990	NO	12.4	10.43	1.96	1	12.1	9.01	3.09	3.08889e-20	0	0	0	0	0	0	transport | membrane | integral to membrane | amino acid transport | amino acid transmembrane transporter activity	Amino acid permease-associated region | Amino acid/polyamine transporter I | Amino acid permease, conserved site						Amino acid transporters	Amino acid transport and metabolism
11373	1420315	NO	11.37	10.38	0.99	1	12.63	10.11	2.52	0.000215822	0	0	0	0	9	0	binding | intracellular | catalytic activity | metabolic process | structural constituent of ribosome | ribosome | translation | alcohol dehydrogenase activity | alcohol dehydrogenase activity, metal ion-independent | alcohol dehydrogenase activity, zinc-dependent | alcohol dehydrogenase activity, iron-dependent	NAD(P)-binding | Alcohol dehydrogenase, zinc-binding | Alcohol dehydrogenase GroES-like | GroES-like | Ribosomal protein S2	1.1.1.1	Alcohol dehydrogenase,	An alcohol + NAD(+) = an aldehyde or ketone + NADH,	Bile acid biosynthesis	Lipid Metabolism	Zinc-binding oxidoreductase | Zinc-binding oxidoreductase	Energy production and conversion
11372	1395795	NO	11.36	10.41	0.94	1	11.81	9.66	2.15	1	0	0	0	0	2	0	binding | zinc ion binding | catalytic activity | metabolic process | oxidoreductase activity | L-iditol 2-dehydrogenase activity	NAD(P)-binding | Alcohol dehydrogenase, zinc-binding | Alcohol dehydrogenase GroES-like | GroES-like | Alcohol dehydrogenase, zinc-containing, conserved site	1.1.1.14	L-iditol 2-dehydrogenase,	L-iditol + NAD(+) = L-sorbose + NADH,	Fructose and mannose metabolism	Carbohydrate Metabolism	Sorbitol dehydrogenase	Secondary metabolites biosynthesis, transport and catabolism
11371	1192832	NO	11.89	10.29	1.6	1	12	10.04	1.96	1	0	0	0	0	0	0	transport | membrane | integral to membrane | amino acid transport | amino acid transmembrane transporter activity	Amino acid permease-associated region | Amino acid/polyamine transporter I | Amino acid permease, fungi | Amino acid permease, conserved site						Amino acid transporters	Amino acid transport and metabolism
11370	967758	NO	12.04	11.88	0.17	1	12.4	11.55	0.85	1	0	0	2	0	0	0	GTP binding | adenylosuccinate synthase activity | purine nucleotide biosynthetic process	Adenylosuccinate synthetase	6.3.4.4	Adenylosuccinate synthase,	GTP + IMP + L-aspartate = GDP + phosphate + adenylosuccinate,	Purine metabolism	Nucleotide Metabolism	Adenylosuccinate synthase	Nucleotide transport and metabolism
11369	64144	NO	12.03	11.58	0.45	1	12.35	11.42	0.93	1	0	0	0	0	0	0
11368	287162	NO	11.72	11.93	-0.21	1	12.07	10.95	1.12	1	0	0	0	0	0	0
11367	1585354	NO	11.72	11.68	0.04	1	12.08	11.22	0.86	1	0	0	0	0	0	0
11366	1554091	YES	11.55	11.87	-0.32	1	12.75	11.63	1.13	1	0	0	0	0	0	0		Phosphatidylethanolamine-binding protein PEBP						Phosphatidylethanolamine binding protein	General function prediction only
11365	1546427	NO	12.28	11.95	0.33	1	12.15	10.79	1.35	1	0	0	3	0	2	0	binding | zinc ion binding | catalytic activity | metabolic process | oxidoreductase activity | oxidoreductase activity, acting on the CH-OH group of donors, NAD or NADP as acceptor | NAD binding | L-iditol 2-dehydrogenase activity	NAD(P)-binding | Alcohol dehydrogenase, zinc-binding | Alcohol dehydrogenase GroES-like | GroES-like | Alcohol dehydrogenase, zinc-containing, conserved site | GroES-related	1.1.1.14	L-iditol 2-dehydrogenase,	L-iditol + NAD(+) = L-sorbose + NADH,	Fructose and mannose metabolism	Carbohydrate Metabolism	Sorbitol dehydrogenase	Secondary metabolites biosynthesis, transport and catabolism
11364	1506537	NO	12.25	12.05	0.19	1	12.33	11.2	1.13	1	6	0	20	0	27	0	intracellular | proteolysis | aminopeptidase activity | leucyl aminopeptidase activity	Peptidase M17, leucyl aminopeptidase, C-terminal | Peptidase M17, leucyl aminopeptidase, N-terminal	3.4.11.1	Leucyl aminopeptidase,	Release of an N-terminal amino acid, Xaa-|-Xbb-, in which Xaa is preferably Leu, but may be other amino acids including Pro although not Arg or Lys, and Xbb may be Pro,			Predicted aminopeptidase of the M17 family	General function prediction only
11363	1502046	NO	11.74	11.47	0.28	1	12.47	10.98	1.49	1	0	0	0	0	8	0	oxidoreductase activity | F420H2 dehydrogenase activity | sulfur oxygenase reductase activity | malolactic enzyme activity | regulation of oxidoreductase activity	Aldo/keto reductase	1.-.-.-	Oxidoreductases,				Voltage-gated shaker-like K+ channel, subunit beta/KCNAB	Energy production and conversion
11362	1456386	NO	12.46	12.19	0.27	1	12.28	11.09	1.19	1	0	0	0	0	0	0		Oligopeptide transporter OPT superfamily						Sexual differentiation process protein ISP4	Signal transduction mechanisms
11361	1454935	NO	12.11	12	0.11	1	11.96	11.09	0.86	1	0	0	0	0	0	0	binding | transport | membrane | transporter activity | integral to membrane	MFS general substrate transporter | Major facilitator superfamily MFS-1 | Major facilitator superfamily | Lipocalin | Sugar transporter, conserved site						Inorganic phosphate transporter	Inorganic ion transport and metabolism
11360	1450142	YES	11.46	11.86	-0.4	1	12.53	10.87	1.67	1	7	0	14	4	11	7	hydrolase activity, hydrolyzing O-glycosyl compounds | carbohydrate metabolic process	Glycoside hydrolase, family 43
11359	1441272	NO	12.09	11.82	0.27	1	12.38	10.94	1.44	1	0	0	0	0	0	0								Predicted RNA-binding protein	General function prediction only
11358	1440924	NO	12.03	11.38	0.65	1	12.85	11.05	1.79	1	0	0	0	0	3	0	oxidoreductase activity | peroxiredoxin activity	Thioredoxin-like fold | Redoxin						Alkyl hydroperoxide reductase/peroxiredoxin	Posttranslational modification, protein turnover, chaperones
11357	1437874	NO	11.88	11.5	0.38	1	12.81	11.49	1.32	1	0	0	3	0	12	0		Protein of unknown function DUF89						Uncharacterized conserved protein	Function unknown
11356	1429945	NO	11.9	12.12	-0.21	1	12.66	10.85	1.8	1	0	0	18	0	29	0
11355	1416514	NO	11.95	11.55	0.4	1	12.3	10.85	1.45	1	0	0	0	0	0	0
11354	1390880	YES	11.87	11.73	0.14	1	12.41	11.27	1.14	1	0	0	0	0	0	0	zinc ion binding | nucleic acid binding	Zinc finger, CCHC-type						E3 ubiquitin ligase interacting with arginine methyltransferase	Posttranslational modification, protein turnover, chaperones
11353	1380665	NO	12.45	11.57	0.88	1	12.37	11.12	1.25	1	0	0	7	0	7	0	electron transport | oxidoreductase activity	2-nitropropane dioxygenase, NPD
11352	1501734	NO	12.2	11.27	0.93	1	12.87	11.98	0.9	1	0	0	0	0	0	0
11351	1479193	YES	12.75	11.81	0.94	1	13.34	12.11	1.24	1	0	0	0	0	0	0		Concanavalin A-like lectin/glucanase | Beta-glucan synthesis-associated, SKN1
11350	1445189	NO	12.08	12.4	-0.32	1	13.59	12.11	1.48	1	3	2	7	6	20	0	ATP binding | protein kinase activity | protein amino acid phosphorylation	Protein kinase-like | Protein kinase, core
11349	1444477	NO	12.15	11.09	1.06	1	13.07	12.3	0.77	1	0	0	0	0	0	0
11348	1432208	YES	12.07	11.69	0.38	1	13.35	11.84	1.51	1	0	0	0	0	0	0
11347	1430769	NO	12.01	11.68	0.33	1	12.92	11.92	1	1	6	0	8	4	5	0	catalytic activity	Six-hairpin glycosidase-like
11346	1386374	YES	11.96	11.21	0.75	1	13.22	12.88	0.33	1	6	0	6	2	7	0	catalytic activity | carbohydrate metabolic process | hydrolase activity, acting on carbon-nitrogen (but not peptide) bonds	Polysaccharide deacetylase | Glycoside hydrolase/deacetylase, beta/alpha-barrel						Serine/threonine protein kinase	Signal transduction mechanisms
11345	891173	NO	13.19	11.84	1.35	1	13.77	12.24	1.52	1	0	0	0	0	0	0
11344	1593652	NO	13.33	12.79	0.54	1	12.78	12.55	0.23	1	0	0	13	0	11	0	ATP binding	Heat shock protein 70 | Heat shock protein Hsp70						Molecular chaperones GRP78/BiP/KAR2, HSP70 superfamily	Posttranslational modification, protein turnover, chaperones
11343	1573822	NO	13.04	12.76	0.28	1	13.63	13.04	0.6	1	0	0	8	0	17	0	oxidoreductase activity | pyridoxine 4-dehydrogenase activity	Aldo/keto reductase	1.1.1.65	Pyridoxine 4-dehydrogenase,	Pyridoxine + NADP(+) = pyridoxal + NADPH,	Vitamin B6 metabolism	Metabolism of Cofactors and Vitamins	Voltage-gated shaker-like K+ channel, subunit beta/KCNAB	Energy production and conversion
11342	1500437	YES	14.39	12.54	1.86	1	14.04	12.93	1.12	1	0	0	0	0	0	0								von Willebrand factor and related coagulation proteins | von Willebrand factor and related coagulation proteins	Extracellular structures
11341	1500164	NO	13.05	12.06	1	1	13.57	12.6	0.97	1	0	0	0	0	0	0		Sad1/UNC-like, C-terminal						Spindle pole body protein, contains UNC-84 domain	Cell cycle control, cell division, chromosome partitioning
11340	1480879	YES	13.65	13.22	0.43	1	13.16	12.48	0.68	1	0	0	0	0	0	0	UDP-N-acetylmuramoylalanyl-D-glutamyl-2,6-diaminopimelate-D-alanyl-D-alanine ligase activity | ribosomal S6-glutamic acid ligase activity | coenzyme F420-0 gamma-glutamyl ligase activity | coenzyme F420-2 alpha-glutamyl ligase activity		6.3.2.-	Acid--D-amino-acid ligases (peptide synthases),		Tryptophan metabolism	Amino Acid Metabolism	TATA box binding protein (TBP)-associated factor, RNA polymerase II	Transcription
11339	1480248	YES	13.9	12.51	1.39	1	13.9	12.71	1.2	1	0	0	0	0	0	0	oxidoreductase activity | transition metal ion binding	Ferritin/ribonucleotide reductase-like						Chitinase	Cell wall/membrane/envelope biogenesis
11338	1452463	YES	13.18	12.96	0.22	1	13.36	12.91	0.45	1	7	0	10	0	10	0	oxidoreductase activity | FMN binding | negative regulation of transcription	Flavodoxin/nitric oxide synthase | Flavoprotein WrbA						1,4-benzoquinone reductase-like; Trp repressor binding protein-like/protoplast-secreted protein	General function prediction only
11337	1451911	YES	12.79	12.47	0.33	1	13.19	12.23	0.96	1	0	0	0	0	0	0	cell wall catabolic process	Peptidoglycan-binding LysM						Serine/threonine protein kinase	Signal transduction mechanisms
11336	1447307	NO	13.02	12.23	0.78	1	13.42	12.47	0.95	1	0	0	0	0	2	0	nucleus | DNA binding | nucleosome | nucleosome assembly	Histone-fold | Histone core | Histone H3						Histones H3 and H4	Chromatin structure and dynamics
11335	1446574	NO	13.01	12.42	0.59	1	13.03	12.31	0.72	1	0	0	0	0	0	0								von Willebrand factor and related coagulation proteins | von Willebrand factor and related coagulation proteins	Extracellular structures
11334	1445357	NO	13.14	13.17	-0.04	1	14.09	12.28	1.81	1	0	0	0	0	0	0	membrane	GPR1/FUN34/yaaH
3376	1452609	NO	7.25	8.1	-0.84	1	8.21	6.32	1.89	1	0	0	0	0	0	0	catalytic activity | metabolic process | C-4 methylsterol oxidase activity	Sterol desaturase						C-4 sterol methyl oxidase	Lipid transport and metabolism
11332	1407014	NO	13.54	11.63	1.91	1	13.12	12.24	0.89	1	0	0	0	0	0	0	protein binding | nucleus | regulation of transcription | transcription factor activity | regulation of transcription, DNA-dependent | DNA binding	Immunoglobulin E-set | Beta-trefoil | LAG1, DNA binding | p53-like transcription factor, DNA-binding						Recombination signal binding protein-J kappa(CBF1, Su(H), HS2NF5)	Transcription
11331	1394586	NO	13.27	12.52	0.75	1	12.89	12.99	-0.1	1	0	0	0	0	0	0	nucleus | transcription factor activity | regulation of transcription, DNA-dependent | sequence-specific DNA binding | protein dimerization activity	Basic-leucine zipper (bZIP) transcription factor | bZIP transcription factor, bZIP-1
11330	608889	NO	13.16	13.13	0.03	1	12.9	12.53	0.37	1	0	0	7	0	14	0	translation elongation factor activity | eukaryotic translation elongation factor 1 complex | translational elongation | glutathione transferase activity	Thioredoxin-like fold | Translation elongation factor EF1B, gamma chain, conserved | Glutathione S-transferase, C-terminal | Glutathione S-transferase, N-terminal | Glutathione S-transferase, C-terminal-like	2.5.1.18	Glutathione transferase,	RX + glutathione = HX + R-S-glutathione,	Glutathione metabolism	Metabolism of Other Amino Acids	Translation elongation factor EF-1 gamma	Translation, ribosomal structure and biogenesis
11329	375078	NO	12.82	13.93	-1.11	1	12.62	12.9	-0.28	1	0	0	7	0	16	0	intracellular | structural constituent of ribosome | ribosome | translation	Ribosomal protein S3Ae						40S ribosomal protein S3A	Translation, ribosomal structure and biogenesis
11328	1589109	NO	12.25	14.24	-1.99	1	12.61	12.2	0.42	1	0	0	0	0	0	0	transport | membrane | transporter activity | integral to membrane | sugar:hydrogen symporter activity | carbohydrate transport | L-arabinose isomerase activity	MFS general substrate transporter | Major facilitator superfamily | Sugar transporter, conserved site | General substrate transporter | Sugar transporter	5.3.1.4	L-arabinose isomerase,	L-arabinose = L-ribulose,	Pentose and glucuronate interconversions	Carbohydrate Metabolism	Predicted transporter (major facilitator superfamily)	General function prediction only
11327	1508718	YES	12.58	13.04	-0.46	1	12.71	12.87	-0.16	1	0	0	4	0	0	12								beta-1,6-N-acetylglucosaminyltransferase, contains WSC domain | beta-1,6-N-acetylglucosaminyltransferase, contains WSC domain	Carbohydrate transport and metabolism
11326	1506459	NO	12.82	13.84	-1.02	1	12.62	12.71	-0.09	1	0	0	7	0	12	0	intracellular | structural constituent of ribosome | ribosome | translation	Translation elongation and initiation factors/Ribosomal, beta-barrel | Ribosomal protein L3						60S ribosomal protein L3 and related proteins	Translation, ribosomal structure and biogenesis
11325	1505848	NO	11.89	13.56	-1.66	1	13.67	12.07	1.6	1	0	0	0	0	10	0	binding | intracellular | catalytic activity | metabolic process | structural constituent of ribosome | ribosome | translation | alcohol dehydrogenase activity | alcohol dehydrogenase activity, metal ion-independent | alcohol dehydrogenase activity, zinc-dependent | alcohol dehydrogenase activity, iron-dependent	NAD(P)-binding | Alcohol dehydrogenase, zinc-binding | Alcohol dehydrogenase GroES-like | GroES-like | Ribosomal protein S2	1.1.1.1	Alcohol dehydrogenase,	An alcohol + NAD(+) = an aldehyde or ketone + NADH,	Bile acid biosynthesis	Lipid Metabolism	Zinc-binding oxidoreductase | Zinc-binding oxidoreductase	Energy production and conversion
11324	1490889	NO	12.26	13.06	-0.8	1	12.78	12.37	0.41	1	0	0	0	0	0	0		cAMP-regulated phosphoprotein/endosulphine conserved region						Regulator of ATP-sensitive K+ channels Alpha-endosulfine/ARPP-19 and related cAMP-regulated phosphoproteins | Regulator of ATP-sensitive K+ channels Alpha-endosulfine/ARPP-19 and related cAMP-regulated phosphoproteins	Signal transduction mechanisms
11323	1481963	YES	12.88	13.96	-1.09	1	12.55	11.97	0.58	1	0	0	0	0	0	0		Glycoside hydrolase, family 61
11322	1479194	NO	12.89	13.13	-0.24	1	12.8	12.77	0.03	1	0	0	6	0	10	0	protein transport | Rab GDP-dissociation inhibitor activity | regulation of GTPase activity	Rab GTPase activator | Rab GDI protein						RAB proteins geranylgeranyltransferase component A (RAB escort protein)	Posttranslational modification, protein turnover, chaperones
11321	1467174	YES	12.83	13	-0.17	1	12.78	12.75	0.03	1	0	0	0	0	0	0
11320	1462536	NO	12.59	13.14	-0.56	1	12.75	12.5	0.25	1	12	0	16	0	25	0	carbohydrate metabolic process | pentose-phosphate shunt | cytoplasm | transaldolase activity	Transaldolase | Transaldolase AB	2.2.1.2	Transaldolase,	Sedoheptulose 7-phosphate + D-glyceraldehyde 3-phosphate = D-erythrose 4-phosphate + D-fructose 6-phosphate,	Pentose phosphate pathway	Carbohydrate Metabolism	Transaldolase	Carbohydrate transport and metabolism
11319	1456314	NO	12.72	13.65	-0.93	1	12.66	12.43	0.23	1	0	0	7	0	13	0	intracellular | RNA binding | structural constituent of ribosome | ribosome | translation	KOW | RNA-binding S4 | Ribosomal protein S4e, N-terminal and RNA-binding | Ribosomal protein S4e, central | Ribosomal protein S4e, N-terminal | Ribosomal protein S4e						40S ribosomal protein S4	Translation, ribosomal structure and biogenesis
11318	1455461	NO	12.43	13.15	-0.72	1	12.52	12.34	0.17	1	0	0	6	0	12	0	ATP binding | nucleoside diphosphate kinase activity | GTP biosynthetic process | UTP biosynthetic process | CTP biosynthetic process	Nucleoside diphosphate kinase, core	2.7.4.6	Nucleoside-diphosphate kinase,	ATP + nucleoside diphosphate = ADP + nucleoside triphosphate,	Purine metabolism	Nucleotide Metabolism	Nucleoside diphosphate kinase	Nucleotide transport and metabolism
11317	1447579	NO	12.5	13.42	-0.92	1	12.47	12.39	0.08	1	0	0	6	0	13	0	intracellular | structural constituent of ribosome | ribosome | translation	Ribosomal protein L6						60S ribosomal protein L9	Translation, ribosomal structure and biogenesis
11316	1446959	NO	12.96	13.43	-0.47	1	12.66	12.81	-0.15	1	0	0	3	0	5	0	ATP binding | nucleic acid binding | ATP-dependent helicase activity | ATP-dependent DNA helicase activity | ATP-dependent RNA helicase activity | DNA-dependent ATPase activity | RNA-dependent ATPase activity | protein-transmembrane transporting ATPase activity | ATPase activity | single-stranded DNA-dependent ATP-dependent DNA helicase activity | ATPase activity, coupled | ATPase activity, uncou…	DEAD-like helicase, N-terminal | Helicase, superfamily 1 and 2, ATP-binding | DNA/RNA helicase, DEAD/DEAH box type, N-terminal | DNA/RNA helicase, C-terminal | RNA helicase, DEAD-box type, Q motif	3.6.1.3	Adenosinetriphosphatase,	ATP + H(2)O = ADP + phosphate,	Purine metabolism	Nucleotide Metabolism	Translation initiation factor 4F, helicase subunit (eIF-4A) and related helicases	Translation, ribosomal structure and biogenesis
11315	1445744	NO	12.68	13.55	-0.87	1	12.69	12.53	0.16	1	0	0	6	0	10	0	intracellular | structural constituent of ribosome | ribosome | translational elongation | ribosome biogenesis and assembly	Ribosomal protein L10 | Ribosomal protein 60S						60S acidic ribosomal protein P0	Translation, ribosomal structure and biogenesis
11314	1445021	NO	12.67	13.79	-1.12	1	12.55	12.47	0.08	1	0	0	4	0	8	0		WD40 repeat | WD40 repeat-like						G protein beta subunit-like protein	Signal transduction mechanisms
11313	1444811	NO	12.64	13.31	-0.68	1	12.31	12.39	-0.08	1	0	0	0	0	0	0	translation elongation factor activity | eukaryotic translation elongation factor 1 complex | translational elongation	Glutathione S-transferase, C-terminal-like | Translation elongation factor EF1B, beta and delta chains, guanine nucleotide exchange | Translation elongation factor EF1B, beta/delta chains, conserved site						Elongation factor 1 beta/delta chain	Transcription
11312	1443688	NO	12.19	13.79	-1.59	1	12.31	12.54	-0.23	1	0	0	0	0	2	0	zinc ion binding | glycolysis | fructose-bisphosphate aldolase activity	Ketose-bisphosphate aldolase, class-II | Fructose-bisphosphate aldolase, class II, yeast/E. coli subtype	4.1.2.13	Fructose-bisphosphate aldolase,	D-fructose 1,6-bisphosphate = glycerone phosphate + D-glyceraldehyde 3- phosphate,	Pentose phosphate pathway	Carbohydrate Metabolism	Fructose 1,6-bisphosphate aldolase	Carbohydrate transport and metabolism
11311	1443003	NO	12.6	13.36	-0.75	1	12.71	12.45	0.26	1	0	0	0	0	2	0		Ribosomal protein S25						40S ribosomal protein S25	Translation, ribosomal structure and biogenesis
11310	1442893	NO	12.49	13.47	-0.98	1	12.57	12.31	0.26	1	0	0	0	0	2	0	intracellular | structural constituent of ribosome | ribosome | translation	Ribosomal protein L7Ae/L30e/S12e/Gadd45 | Ribosomal protein S12e						40S ribosomal protein S12	Translation, ribosomal structure and biogenesis
11309	1441716	NO	12.65	13.4	-0.75	1	12.68	12.38	0.3	1	0	0	0	0	0	0	intracellular | structural constituent of ribosome | ribosome | translational elongation	Ribosomal protein 60S						60S acidic ribosomal protein P2	Translation, ribosomal structure and biogenesis
11308	1440580	NO	12.8	13.74	-0.93	1	12.75	12.56	0.2	1	0	0	9	0	12	0	intracellular | transcription regulator activity | structural constituent of ribosome | ribosome | translation | large ribosomal subunit	Ribosomal protein L30, C-terminal | Ribosomal protein L30, core | Ribosomal protein L30, N-terminal | Ribosomal protein L7, eukaryotic						60S ribosomal protein L7	Translation, ribosomal structure and biogenesis
11307	1440380	NO	12.92	13.45	-0.53	1	12.49	12.74	-0.24	1	0	0	3	0	9	0	ATP binding	Heat shock protein 70 | Heat shock protein Hsp70						Molecular chaperones HSP70/HSC70, HSP70 superfamily	Posttranslational modification, protein turnover, chaperones
11306	1407271	NO	12.32	13.46	-1.14	1	12.33	12.25	0.08	1	0	0	3	0	4	0	intracellular | nucleic acid binding | RNA binding | structural constituent of ribosome | ribosome | translation	Ribosomal protein S13-like, H2TH | Ribosomal protein S13						Ribosomal protein S18	Translation, ribosomal structure and biogenesis
11305	1399133	NO	12.8	13.68	-0.88	1	12.77	12.78	-0.01	1	0	0	7	0	13	0	intracellular | structural constituent of ribosome | ribosome | translation	Ribosomal protein L1						60S ribosomal protein L10A	Translation, ribosomal structure and biogenesis
11304	1397476	NO	12.64	13.64	-0.99	1	12.65	12.74	-0.09	1	0	0	2	0	3	0	intracellular | structural constituent of ribosome | ribosome | translation	Ribosomal protein L19/L19e						60s ribosomal protein L19	Translation, ribosomal structure and biogenesis
11303	1392996	NO	12.5	13.65	-1.15	1	12.69	12.3	0.4	1	0	0	6	0	11	0	binding | catalytic activity | metabolic process | carbohydrate metabolic process | oxidoreductase activity | oxidoreductase activity, acting on the CH-OH group of donors, NAD or NADP as acceptor | glycolysis | malate metabolic process | malate dehydrogenase activity | tricarboxylic acid cycle interMEANte metabolic process | cellular carbohydrate metabolic process | L-malate dehydrogenase activity	NAD(P)-binding | Malate dehydrogenase, active site | Lactate/malate dehydrogenase | L-lactate/malate dehydrogenase | Malate dehydrogenase, NAD-dependent, eukaryotes and gamma proteobacteria | Lactate dehydrogenase/glycoside hydrolase, family 4, C-terminal	1.1.1.37	Malate dehydrogenase,	(S)-malate + NAD(+) = oxaloacetate + NADH,	Citrate cycle (TCA cycle)	Carbohydrate Metabolism	NAD-dependent malate dehydrogenase	Energy production and conversion
11302	1559825	NO	13.88	13.57	0.31	1	13.82	13.61	0.21	1	0	0	2	0	2	0	binding | catalytic activity | metabolic process | alcohol dehydrogenase activity | alcohol dehydrogenase activity, metal ion-independent | alcohol dehydrogenase activity, zinc-dependent | alcohol dehydrogenase activity, iron-dependent	NAD(P)-binding | Alcohol dehydrogenase, zinc-binding | Alcohol dehydrogenase GroES-like | GroES-like	1.1.1.1	Alcohol dehydrogenase,	An alcohol + NAD(+) = an aldehyde or ketone + NADH,	Bile acid biosynthesis	Lipid Metabolism	Alcohol dehydrogenase, class V	Secondary metabolites biosynthesis, transport and catabolism
11301	1514603	NO	13.51	13.27	0.24	1	13.98	13.99	-0.01	1	0	0	0	0	0	0
11300	1511425	YES	13.02	15.13	-2.11	0.278871	13.1	14.77	-1.67	1	40	14	10	25	2	0		Immunoglobulin E-set | Glyoxal oxidase, N-terminal | Region of unknown function DUF1929 | Galactose oxidase/kelch, beta-propeller
11299	1506038	NO	13.54	14.03	-0.48	1	13.62	13.76	-0.15	1	0	0	0	0	0	0	membrane | integral to membrane | iron ion binding | electron transport | oxidoreductase activity | FAD binding	Ferric reductase-like transmembrane component, N-terminal | FAD-binding 8 | Ferric reductase, NAD binding | Cytochrome b-245, heavy chain						Ferric reductase, NADH/NADPH oxidase and related proteins | Ferric reductase, NADH/NADPH oxidase and related proteins	Secondary metabolites biosynthesis, transport and catabolism
11298	1498691	NO	13.21	13.96	-0.75	1	13.3	13.42	-0.12	1	0	0	2	0	9	0	intracellular | structural constituent of ribosome | ribosome | translation	Ribosomal protein L10e/L16 | Ribosomal protein L10e						60s ribosomal protein L10	Translation, ribosomal structure and biogenesis
11297	1492799	NO	13.53	14.29	-0.76	1	14.03	13.66	0.37	1	0	0	0	0	5	0	intracellular | protein binding | GTP binding | small GTPase MEANted signal transduction | GTPase activity | intracellular protein transport | nucleocytoplasmic transport | signal transduction | protein transport	Ras GTPase | Ras | Ras small GTPase, Ras type | Ras small GTPase, Rho type | Ras small GTPase, Rab type | Ran GTPase | Small GTP-binding protein						GTPase Ran/TC4/GSP1 (nuclear protein transport pathway), small G protein superfamily	Intracellular trafficking, secretion, and vesicular transport
11296	1457029	NO	13.56	14.36	-0.8	1	13.37	14.16	-0.79	1	10	2	26	0	32	0	glycolysis | phosphopyruvate hydratase complex | phosphopyruvate hydratase activity	Enolase	4.2.1.11	Phosphopyruvate hydratase,	2-phospho-D-glycerate = phosphoenolpyruvate + H(2)O,	Phenylalanine, tyrosine and tryptophan biosynthesis	Amino Acid Metabolism	Enolase	Carbohydrate transport and metabolism
11295	1456753	NO	13.12	14.41	-1.28	1	12.88	14.24	-1.36	1	0	0	10	0	2	0	catalytic activity | metabolic process | carboxylic acid metabolic process | isocitrate lyase activity	Isocitrate lyase and phosphorylmutase, core | Isocitrate lyase and phosphorylmutase | Pyruvate/Phosphoenolpyruvate kinase, catalytic core | Isocitrate lyase	4.1.3.1	Isocitrate lyase,	Isocitrate = succinate + glyoxylate,	Glyoxylate and dicarboxylate metabolism	Carbohydrate Metabolism	Isocitrate lyase	Energy production and conversion
11294	1452347	YES	13.61	14.82	-1.21	1	13.77	13.1	0.66	1	0	0	0	0	0	0		Cupredoxin
11293	1452085	NO	13.18	14.34	-1.16	1	13.25	13.68	-0.43	1	0	0	0	0	2	0	microtubule | GTP binding | microtubule-based process | GTPase activity | structural molecule activity | microtubule-based movement | protein complex | protein polymerization	Tubulin | Tubulin/FtsZ, GTPase | Tubulin/FtsZ, C-terminal | Alpha tubulin						Alpha tubulin	Cytoskeleton
11292	1451543	NO	13.36	13.71	-0.35	1	13.08	14.11	-1.03	1	4	0	8	0	8	0	zinc ion binding | proteolysis | metalloendopeptidase activity | metallopeptidase activity	Peptidase M, neutral zinc metallopeptidases, zinc-binding site | Peptidase M36, fungalysin | Propeptide, peptidase M4 and M36
11291	1447977	NO	13.8	13.85	-0.05	1	13.42	13.69	-0.27	1	0	0	0	0	3	0	transport | membrane | ATP binding | ATPase activity | integral to membrane | catalytic activity | metabolic process | cation transport | proton transport | ATPase activity, coupled to transmembrane movement of ions, phosphorylative mechanism | hydrolase activity, acting on acid anhydrides, catalyzing transmembrane movement of substances | hydrogen-exporting ATPase activity, phosphorylative mecha…	Haloacid dehalogenase-like hydrolase | ATPase, P-type, K/Mg/Cd/Cu/Zn/Na/Ca/Na/H-transporter | H+ transporting ATPase, proton pump | E1-E2 ATPase-associated region | ATPase, P-type cation-transporter, N-terminal | Plasma-membrane proton-efflux P-type ATPase	3.6.3.6	Proton-exporting ATPase,	ATP + H(2)O + H(+)(In) = ADP + phosphate + H(+)(Out),	Oxidative phosphorylation	Energy Metabolism	Plasma membrane H+-transporting ATPase	Inorganic ion transport and metabolism
11290	1444738	NO	13.5	14.59	-1.09	1	13.6	13.49	0.11	1	0	0	0	0	0	0	iron ion binding | monooxygenase activity | electron transport | heme binding | unspecific monooxygenase activity	Cytochrome P450 | Cytochrome P450, E-class, group I	1.14.14.1	Unspecific monooxygenase,	RH + reduced flavoprotein + O(2) = ROH + oxidized flavoprotein + H(2)O,	Tryptophan metabolism	Amino Acid Metabolism	Cytochrome P450 CYP2 subfamily	Secondary metabolites biosynthesis, transport and catabolism
11289	1442730	NO	13.93	14	-0.08	1	13.8	13.62	0.18	1	3	0	11	0	41	0	protein domain specific binding	14-3-3 protein						Multifunctional chaperone (14-3-3 family)	Posttranslational modification, protein turnover, chaperones
11288	1439324	YES	13.39	13.86	-0.47	1	13.87	13.04	0.83	1	0	0	0	0	0	0
11287	1437796	NO	13.91	13.86	0.05	1	13.64	13.3	0.34	1	0	0	18	0	33	0	GTP binding | GTPase activity | translation | protein-synthesizing GTPase activity	Small GTP-binding protein | Protein synthesis factor, GTP-binding | Translation elongation factor EFTu/EF1A, domain 2 | Translation elongation and initiation factors/Ribosomal, beta-barrel | Translation elongation factor EFG/EF2, C-terminal | Translation elongation factor EFG/EF2, domain IV | Elongation factor G, III and V						Elongation factor 2	Translation, ribosomal structure and biogenesis
11286	1435089	YES	13.58	14.93	-1.35	1	14.14	14.34	-0.2	1	0	0	13	0	24	0	binding | catalytic activity | metabolic process | glyceraldehyde-3-phosphate dehydrogenase (phosphorylating) activity | glycolysis | NAD binding | glucose metabolic process | glyceraldehyde-3-phosphate dehydrogenase activity	NAD(P)-binding | Glyceraldehyde 3-phosphate dehydrogenase | Glyceraldehyde-3-phosphate dehydrogenase, type I	1.2.1.12	Glyceraldehyde 3-phosphate dehydrogenase (phosphorylating),	D-glyceraldehyde 3-phosphate + phosphate + NAD(+) = 3-phospho-D- glyceroyl phosphate + NADH,	Glycolysis / Gluconeogenesis	Carbohydrate Metabolism	Glyceraldehyde 3-phosphate dehydrogenase	Carbohydrate transport and metabolism
11285	1428034	YES	12.87	14.12	-1.24	1	14.11	13.82	0.29	1	0	0	3	0	11	0		Ricin B-related lectin
11284	1413056	YES	13.62	14.92	-1.3	1	14.09	13.87	0.22	1	0	0	6	0	12	0	metal ion binding | superoxide dismutase activity | superoxide metabolic process	Manganese and iron superoxide dismutase	1.15.1.1	Superoxide dismutase,	2 peroxide radical + 2 H(+) = O(2) + H(2)O(2),			Manganese superoxide dismutase	Inorganic ion transport and metabolism
11283	1396773	NO	13.31	14.31	-1	1	13.33	13.61	-0.28	1	0	0	5	0	17	0	microtubule | GTP binding | microtubule-based process | GTPase activity | structural molecule activity | microtubule-based movement | protein complex | protein polymerization	Tubulin | Beta tubulin, autoregulation binding site | Beta tubulin | Tubulin/FtsZ, GTPase | Tubulin/FtsZ, C-terminal						Beta tubulin	Cytoskeleton
11282	1390043	NO	13.8	14.82	-1.01	1	13.45	14.06	-0.61	1	0	0	8	0	5	0	binding | transport | membrane | transporter activity | mitochondrial inner membrane	Mitochondrial substrate carrier | Mitochondrial carrier protein | Adenine nucleotide translocator 1						Mitochondrial ADP/ATP carrier proteins	Energy production and conversion
11281	1545483	NO	11.04	16.23	-5.19	9.11842e-81	11.37	14.82	-3.46	7.6647e-15	0	0	4	0	0	0	ATP binding | phosphoenolpyruvate carboxykinase (ATP) activity | gluconeogenesis | phosphoenolpyruvate carboxykinase activity | purine nucleotide binding	Phosphoenolpyruvate carboxykinase, N-terminal | Phosphoenolpyruvate carboxykinase, ATP-utilising | Phosphoenolpyruvate carboxykinase (ATP), conserved site	4.1.1.49	Phosphoenolpyruvate carboxykinase (ATP),	ATP + oxaloacetate = ADP + phosphoenolpyruvate + CO(2),	Carbon fixation	Energy Metabolism
11280	1446645	NO	9.81	16.62	-6.8	1.66006e-183	10.55	15.6	-5.05	3.45611e-61	0	0	0	0	4	0	protein binding | ATP binding | nucleotide binding | nucleoside-triphosphatase activity | protein metabolic process	AAA+ ATPase, core | AAA ATPase, core | Chaperonin clpA/B | ATPase AAA-2 | Clp, N-terminal						Chaperone HSP104 and related ATP-dependent Clp proteases	Posttranslational modification, protein turnover, chaperones
11279	1440198	NO	8.79	16.83	-8.05	7.34078e-56	13.57	15.9	-2.34	1	0	0	0	0	0	0		HSP20-like chaperone | Heat shock protein Hsp20 | CS domain						Molecular chaperone (small heat-shock protein Hsp26/Hsp42)	Posttranslational modification, protein turnover, chaperones
11278	682179	YES	12.27	4.59	7.69	1.53762e-104	11.62	4.82	6.8	6.90933e-98	5	0	13	0	14	0	extracellular region | hydrolase activity, hydrolyzing O-glycosyl compounds | carbohydrate metabolic process | cellulose binding	Glycoside hydrolase, catalytic core | Cellulose-binding region, fungal | Glycoside hydrolase, family 5
11277	1587700	YES	12.54	4.04	8.51	1.04121e-37	12.94	4.4	8.54	1.59099e-56	2	0	13	0	14	2		Pectate lyase/Amb allergen | Pectin lyase fold/virulence factor
11276	1587202	YES	12.54	4.94	7.6	1.02661e-55	12.9	4.58	8.32	2.00298e-59	0	0	8	0	12	0		Glycoside hydrolase, family 61
11275	1531390	YES	11.74	3.85	7.89	1.21635e-21	12.64	4.28	8.36	2.59777e-116	4	0	15	0	16	8	catalytic activity | carbohydrate metabolic process | carbohydrate binding | cation binding | alpha-amylase activity	Glycoside hydrolase, catalytic core | Glycoside hydrolase, carbohydrate-binding | Carbohydrate-binding-like fold | Glycosyl hydrolase, family 13, catalytic region | Glycosyl hydrolase, family 13, subfamily, catalytic region | Glycoside hydrolase family 13 | Alpha-amylase, C-terminal all beta	3.2.1.1	Alpha-amylase,	Endohydrolysis of 1,4-alpha-glucosidic linkages in oligosaccharides and polysaccharides,	Starch and sucrose metabolism	Metabolism of Complex Carbohydrates	Alpha-amylase	Carbohydrate transport and metabolism
11274	1509312	YES	12.59	4.76	7.84	1.7874e-47	12.9	4.24	8.66	3.02622e-50	0	0	5	0	4	0		Glycoside hydrolase, family 61
11273	1491814	YES	11.96	4.52	7.44	8.42196e-104	11.94	4.17	7.77	2.54063e-111	8	0	13	0	13	0	extracellular region | hydrolase activity, hydrolyzing O-glycosyl compounds | carbohydrate metabolic process | cellulose binding	Glycoside hydrolase, catalytic core | Cellulose-binding region, fungal | Glycoside hydrolase, family 5
11272	1462365	YES	12.25	5.13	7.11	5.21162e-118	13	5.09	7.92	7.11682e-154	0	0	0	0	0	0		Glycoside hydrolase, family 61
11271	1450842	YES	11.8	5.54	6.26	3.51693e-90	12.6	4.32	8.28	1.50605e-113	0	0	0	0	0	0		Cupredoxin
11270	1385130	YES	13.68	5.47	8.21	7.63751e-74	13.6	5.57	8.03	1.17846e-57	4	0	7	0	8	0	zinc ion binding | proteolysis | metalloendopeptidase activity | metallopeptidase activity	Peptidase M, neutral zinc metallopeptidases, zinc-binding site | Peptidase M35, deuterolysin
11269	991233	YES	10.98	5.25	5.73	2.5763e-84	12.19	5.86	6.33	7.39754e-133	0	0	6	3	14	12	catalytic activity | metabolic process | 5-carboxymethyl-2-hydroxymuconate delta-isomerase activity	Fumarylacetoacetase, C-terminal-like | Fumarylacetoacetase, C-terminal-related	5.3.3.10	5-carboxymethyl-2-hydroxymuconate delta-isomerase,	5-carboxymethyl-2-hydroxymuconate = 5-carboxy-2-oxohept-3-enedioate,	Benzoate degradation via hydroxylation	Biodegradation of Xenobiotics	Predicted fumarylacetoacetate hydralase	General function prediction only
11268	868459	YES	11.49	6.28	5.21	2.59462e-53	11.69	5.59	6.1	9.18231e-68	9	0	9	2	8	3
11267	1526286	YES	11.8	5.5	6.29	9.05448e-120	12.16	6.09	6.06	4.42241e-124	7	0	11	0	12	0	extracellular region | hydrolase activity, hydrolyzing O-glycosyl compounds | carbohydrate metabolic process | cellulose binding	Cellulose-binding region, fungal
11266	1508358	YES	11.53	6.08	5.45	2.05411e-79	12.3	5.35	6.95	7.90722e-124	3	0	8	0	8	3	cellulase activity | polysaccharide catabolic process	Concanavalin A-like lectin/glucanase | Glycoside hydrolase, family 12
11265	1503043	YES	10.6	6.54	4.05	1.0959e-09	14.13	5.47	8.66	6.31787e-67	2	0	8	0	19	0
11264	1457633	YES	11.78	5.39	6.39	8.1307e-39	12.3	6.04	6.26	1.88702e-30	0	0	0	0	3	0		Glycoside hydrolase, family 61
11263	1457093	YES	11.66	5.63	6.04	6.36603e-84	12.18	5.96	6.22	3.5331e-86	0	0	4	0	3	0		Glycoside hydrolase, family 61
11262	1446597	NO	11.87	6.12	5.75	1.26813e-116	11.66	5.45	6.21	3.76235e-117	0	0	0	0	5	0	binding | catalytic activity | metabolic process | oxidoreductase activity | ketol-acid reductoisomerase activity	NAD(P)-binding | 6-phosphogluconate dehydrogenase, C-terminal-like | Acetohydroxy acid isomeroreductase, catalytic	1.1.1.86	Ketol-acid reductoisomerase,	(R)-2,3-dihydroxy-3-methylbutanoate + NADP(+) = (S)-2-hydroxy-2-methyl- 3-oxobutanoate + NADPH,	Valine, leucine and isoleucine biosynthesis	Amino Acid Metabolism
11261	1427424	YES	13.22	5.63	7.59	2.52554e-175	12.78	6.08	6.7	7.39754e-133	7	0	15	0	31	6	extracellular region | hydrolase activity, hydrolyzing O-glycosyl compounds | carbohydrate metabolic process | cellulose binding	Cellulose-binding region, fungal | Glycoside hydrolase, family 6 | 1, 4-beta cellobiohydrolase
11260	1391991	YES	11.26	6.02	5.24	2.60143e-75	12.6	5.67	6.93	1.32152e-142	0	0	2	0	0	0		Glycoside hydrolase, family 61
11259	110653	YES	12.35	5.81	6.54	1.25273e-114	12.72	6.15	6.56	8.39088e-111	0	0	6	0	5	0		Glycoside hydrolase, family 61
11258	1060054	YES	12.54	5.61	6.93	8.57941e-95	12.86	5.83	7.03	2.17505e-86	2	0	11	0	15	22		Immunoglobulin E-set | Glyoxal oxidase, N-terminal | Region of unknown function DUF1929 | Galactose oxidase/kelch, beta-propeller
11257	87649	NO	9.72	5.39	4.33	5.68158e-31	10.74	7.38	3.37	1.08434e-11	0	0	0	0	2	0		LamB/YcsF
11256	240535	NO	10.32	6.58	3.74	1.44709e-24	10.45	7.87	2.57	0.00436965	0	0	0	0	0	0
11255	1564983	NO	10.5	6.48	4.02	8.47871e-34	11.76	6.96	4.8	3.98633e-57	0	0	0	0	0	0	iron ion binding | oxidoreductase activity | 1-aminocyclopropane-1-carboxylate oxidase activity	2OG-Fe(II) oxygenase | Isopenicillin N synthase						Iron/ascorbate family oxidoreductases | Iron/ascorbate family oxidoreductases	General function prediction only
11254	1526852	NO	10.24	7.04	3.2	1.54437e-14	10.52	7.04	3.48	2.29545e-17	0	0	0	0	0	0	integral to membrane	C4-dicarboxylate transporter/malic acid transport protein
11253	1521705	NO	10.64	6.71	3.93	4.6721e-40	11.08	7.11	3.97	6.45105e-38	0	0	0	0	0	0	metabolic process | electron transport | oxidoreductase activity | salicylate 1-monooxygenase activity	Aromatic-ring hydroxylase | Fumarate reductase/succinate dehydrogenase flavoprotein, N-terminal	1.14.13.1	Salicylate 1-monooxygenase,	Salicylate + NADH + O(2) = catechol + NAD(+) + H(2)O + CO(2),	Fluorene degradation	Biodegradation of Xenobiotics	Kynurenine 3-monooxygenase and related flavoprotein monooxygenases | Kynurenine 3-monooxygenase and related flavoprotein monooxygenases	Energy production and conversion
11252	1512579	NO	10.69	6.59	4.1	5.70176e-54	10.46	7.15	3.31	1.06919e-22	0	0	0	0	3	0	hydrolase activity, hydrolyzing O-glycosyl compounds | carbohydrate metabolic process | beta-glucosidase activity	Glycoside hydrolase, family 3, N-terminal | Glycoside hydrolase, family 3, C-terminal | Glycoside hydrolase, catalytic core | PA14	3.2.1.21	Beta-glucosidase,	Hydrolysis of terminal, non-reducing beta-D-glucose residues with release of beta-D-glucose,	Starch and sucrose metabolism	Metabolism of Complex Carbohydrates
11251	1506993	YES	9.94	6.54	3.4	9.95713e-19	10.09	6.64	3.45	8.16361e-18	0	0	0	0	0	0	proteolysis | subtilase activity | serine-type peptidase activity | tripeptidyl-peptidase I activity	Peptidase S8 and S53, subtilisin, kexin, sedolisin | Proteinase inhibitor, propeptide | Peptidase S53, propeptide	3.4.14.9	Tripeptidyl-peptidase I,	Release of an N-terminal tripeptide from a polypeptide,
11250	1455519	NO	9.98	6.87	3.12	7.45717e-14	10.71	7.29	3.41	1.8216e-18	0	0	0	0	6	0	binding | catalytic activity | metabolic process | regulation of nitrogen utilization | transcription repressor activity | enoyl-[acyl-carrier-protein] reductase activity | 2,3-dihydroxy-2,3-dihydro-phenylpropionate dehydrogenase activity | cis-2,3-dihydrodiol DDT dehydrogenase activity | trans-9R,10R-dihydrodiolphenanthrene dehydrogenase activity | cis-chlorobenzene dihydrodiol dehydrogenase act…	NAD(P)-binding | NmrA-like	1.3.1.-	With NAD(+) or NADP(+) as acceptor,
11249	1449925	NO	11.02	6.84	4.18	2.68973e-37	10.84	7.24	3.6	3.87077e-18	0	0	0	0	0	0		Uncharacterised conserved protein UCP014753
11248	1444814	NO	10.54	6.16	4.38	1.20521e-41	10.66	6.68	3.97	5.52779e-27	0	0	4	0	4	0	cyanamide hydratase activity	Metal-dependent phosphohydrolase, HD region, subdomain | Cyanamide hydratase, HD-type	4.2.1.69	Cyanamide hydratase,	Urea = cyanamide + H(2)O,
11247	1444580	YES	10.13	6.34	3.79	4.16392e-18	10.75	6.66	4.09	9.97301e-20	0	0	5	0	14	0	catalytic activity | carbohydrate metabolic process | carbohydrate binding | carbon-oxygen lyase activity, acting on polysaccharides	Glycoside hydrolase-type carbohydrate-binding | Galactose-binding like | Carbohydrate-binding-like fold | Rhamnogalacturonase B, N-terminal						Chitinase	Cell wall/membrane/envelope biogenesis
11246	1441855	YES	10.19	7.07	3.12	2.70331e-13	10.52	7.03	3.49	2.39663e-18	0	0	0	0	0	0	hydrolase activity, hydrolyzing O-glycosyl compounds | carbohydrate metabolic process	Glycoside hydrolase, family 43
11245	1399890	NO	10.23	6.63	3.6	4.13285e-24	10.41	7.33	3.07	1.67897e-10	0	0	10	0	8	0	hydrolase activity, hydrolyzing O-glycosyl compounds | carbohydrate metabolic process | beta-glucosidase activity	Glycoside hydrolase, family 3, N-terminal | Glycoside hydrolase, family 3, C-terminal | Glycoside hydrolase, catalytic core | PKD	3.2.1.21	Beta-glucosidase,	Hydrolysis of terminal, non-reducing beta-D-glucose residues with release of beta-D-glucose,	Starch and sucrose metabolism	Metabolism of Complex Carbohydrates
4890	1419511	NO	5.81	4.13	1.68	1	5.88	4.01	1.86	1	0	0	0	0	0	0	iron ion binding | monooxygenase activity | electron transport | heme binding | fluorene oxygenase activity | mono-butyltin dioxygenase activity | limonene 8-monooxygenase activity | tri-n-butyltin dioxygenase activity | di-n-butyltin dioxygenase activity | methylsilanetriol hydroxylase activity | methyl tertiary butyl ether 3-monooxygenase activity | 4-nitrocatechol 4-monooxygenase activity | 4-…	Cytochrome P450 | Cytochrome P450, E-class, group I	1.14.-.-	Acting on paired donors, with incorporation or reduction of		gamma-Hexachlorocyclohexane degradation	Biodegradation of Xenobiotics	Cytochrome P450 CYP4/CYP19/CYP26 subfamilies | Cytochrome P450 CYP4/CYP19/CYP26 subfamilies	Lipid transport and metabolism
11243	1224766	YES	12.02	7.1	4.91	1.56342e-16	9.44	7.17	2.27	1	0	0	0	0	0	0
11242	1592778	NO	10.02	7.61	2.41	0.0732166	10.22	7.53	2.69	0.000791801	0	0	0	0	0	0
11241	1503341	YES	10.5	7.16	3.34	0.00069207	10.01	7.55	2.46	1	0	0	0	0	0	0
11240	1503133	NO	9.98	6.94	3.03	8.06616e-10	9.48	7.75	1.73	1	0	0	0	0	0	0		Actin-binding FH2						Growth factor receptor-bound proteins (GRB7, GRB10, GRB14)	Signal transduction mechanisms
11239	1492299	NO	9.84	7.67	2.17	0.592951	9.9	7.55	2.35	0.0560159	0	0	0	0	0	0		Rhamnose mutarotase
11238	1458182	NO	9.82	7.15	2.67	2.31646e-05	9.89	7.35	2.54	0.00452471	0	0	0	0	0	0	hydrolase activity | metabolic process | arylformamidase activity	Alpha/beta hydrolase fold-3	3.5.1.9	Arylformamidase,	N-formyl-L-kynurenine + H(2)O = formate + L-kynurenine,	Glyoxylate and dicarboxylate metabolism	Carbohydrate Metabolism	Carboxylesterase and related proteins	General function prediction only
11237	1450052	NO	9.58	7.51	2.07	1	9.87	7.48	2.39	0.124209	0	0	0	0	0	0
11236	1440840	YES	9.9	7.4	2.5	2.59701e-05	9.6	7.57	2.03	1	0	0	0	0	0	0	catalytic activity	Six-hairpin glycosidase-like
11235	1438448	NO	10.21	7.22	2.98	6.37304e-11	10.01	6.77	3.23	3.6456e-13	0	0	0	0	0	0	oxidoreductase activity | alcohol dehydrogenase (NADP+) activity	Aldo/keto reductase	1.1.1.2	Alcohol dehydrogenase (NADP+),	An alcohol + NADP(+) = an aldehyde + NADPH,	Caprolactam degradation	Biodegradation of Xenobiotics	Aldo/keto reductase family proteins	General function prediction only
11234	1431563	NO	10.11	7.14	2.96	2.80501e-12	10.55	7.4	3.15	1.97287e-14	0	0	0	0	0	0	binding | catalytic activity | metabolic process | cofactor binding | L-aminoadipate-semialdehyde dehydrogenase activity | aminoadipate-semialdehyde dehydrogenase complex	AMP-dependent synthetase and ligase | NAD(P)-binding | Phosphopantetheine-binding | Acyl carrier protein-like | Male sterility, NAD-binding	1.2.1.31	Aminoadipate-semialdehyde dehydrogenase,	L-2-aminoadipate 6-semialdehyde + NADP(+) + H(2)O = L-2-aminoadipate + NADPH,	Lysine biosynthesis	Amino Acid Metabolism	Non-ribosomal peptide synthetase/alpha-aminoadipate reductase and related enzymes	Secondary metabolites biosynthesis, transport and catabolism
11233	1427092	YES	9.74	7.39	2.35	0.0571535	10.05	7.59	2.47	0.0424896	0	0	0	0	0	0	hydrolase activity, hydrolyzing O-glycosyl compounds | carbohydrate metabolic process | alpha-galactosidase activity	Glycoside hydrolase, catalytic core | Glycoside hydrolase, clan GH-D | Glycoside hydrolase, family 27	3.2.1.22	Alpha-galactosidase,	Melibiose + H(2)O = galactose + glucose,	Galactose metabolism	Carbohydrate Metabolism	Alpha-D-galactosidase (melibiase)	Carbohydrate transport and metabolism
11232	1405357	NO	10.05	7.46	2.58	2.53382e-05	9.99	7.29	2.7	1.50045e-05	0	0	0	0	0	0
11231	1382702	NO	10.05	7.2	2.86	1.73243e-12	10.28	7.34	2.94	5.86127e-13	0	0	0	0	0	0		Protein of unknown function DUF1479
11230	994279	YES	9.3	7.15	2.14	1	9.53	7.27	2.27	1	6	0	12	0	19	13	proteolysis | serine-type peptidase activity	Peptidase S41
11229	201471	YES	9.8	6.99	2.81	1.36699e-07	9.53	7.19	2.34	0.168643	0	0	4	0	0	0	hydrolase activity, hydrolyzing O-glycosyl compounds | carbohydrate metabolic process	Glycoside hydrolase, family 6 | 1, 4-beta cellobiohydrolase
11228	1589359	NO	9.14	7.24	1.9	1	10.13	7.5	2.63	0.00949019	0	0	0	0	0	0	intracellular | zinc ion binding | nucleus | nucleic acid binding | transcription factor activity | regulation of transcription, DNA-dependent	Zinc finger, C2H2-type | Zinc finger, C2H2-like | Fungal transcriptional regulatory protein, N-terminal						FOG: Zn-finger	General function prediction only
11227	1573253	NO	9.21	7.13	2.07	1	9.99	7.46	2.52	0.0115061	0	0	0	0	0	0	catalytic activity	Lipase, active site
11226	1453339	NO	9.6	6.46	3.14	2.87463e-16	9.59	7.65	1.94	1	0	0	0	0	0	0	catalytic activity | oxidoreductase activity | FAD binding | (R,R)-butanediol dehydrogenase activity	FAD linked oxidase, N-terminal | FAD-binding, type 2 | FAD-linked oxidase-like, C-terminal | FAD-linked oxidase, C-terminal	1.1.1.4	(R,R)-butanediol dehydrogenase,	(R,R)-butane-2,3-diol + NAD(+) = (R)-acetoin + NADH,	Butanoate metabolism	Carbohydrate Metabolism	Proteins containing the FAD binding domain	Energy production and conversion
11225	1445075	NO	9.28	6.87	2.42	0.0214228	9.8	7.71	2.08	1	0	0	0	0	0	0
11224	1442900	YES	9.71	6.6	3.11	5.21101e-07	10.02	6.8	3.22	1.56199e-06	0	0	0	0	8	7	proteolysis | pepsin A activity | aspartic-type endopeptidase activity | sugar binding	Peptidase A1 | Peptidase aspartic, active site | Peptidase aspartic, catalytic | Legume lectin, beta domain	3.4.23.3	Gastricsin,	More restricted specificity than pepsin A, but shows preferential cleavage at Tyr-|-Xaa bonds; high activity towards hemoglobin as substrate,			Aspartyl protease	Posttranslational modification, protein turnover, chaperones
11223	1430254	NO	9.28	6.9	2.38	0.0036351	9.97	7.16	2.81	3.50493e-09	0	0	0	0	0	0
11222	1380919	NO	8.89	7.18	1.71	1	10.18	6.82	3.36	2.00786e-22	0	0	0	0	0	0	membrane | glycolipid 2-alpha-mannosyltransferase activity | protein amino acid glycosylation	Glycosyl transferase, family 15	2.4.1.131	Glycolipid 2-alpha-mannosyltransferase,	Transfers an alpha-D-mannosyl residue from GDP-mannose into lipid-linked oligosaccharide, forming an alpha-1,2-D-mannosyl-D-mannose linkage,	N-Glycans biosynthesis	Metabolism of Complex Carbohydrates	Glycolipid 2-alpha-mannosyltransferase (alpha-1,2-mannosyltransferase)	Carbohydrate transport and metabolism
11221	1189613	NO	9.18	6.95	2.23	0.397735	9.64	7.54	2.1	1	0	0	0	0	0	0								Transcription factor BLIMP-1/PRDI-BF1, contains C2H2-type Zn-finger and SET domains	Transcription
11220	1481632	NO	9.29	7.74	1.55	1	9.74	7.17	2.57	0.000629032	0	0	0	0	0	0	transport | membrane | transporter activity | integral to membrane | sugar:hydrogen symporter activity | carbohydrate transport | L-arabinose isomerase activity	MFS general substrate transporter | Major facilitator superfamily | Sugar transporter, conserved site | General substrate transporter | Sugar transporter	5.3.1.4	L-arabinose isomerase,	L-arabinose = L-ribulose,	Pentose and glucuronate interconversions	Carbohydrate Metabolism	Predicted transporter (major facilitator superfamily)	General function prediction only
11219	1481462	NO	9.14	7.99	1.15	1	9.08	7.16	1.92	1	0	0	0	0	0	0	catalytic activity | metabolic process | protein tyrosine/serine/threonine phosphatase activity | phosphatidylinositol-4,5-bisphosphate 5-phosphatase activity | protein tyrosine/threonine phosphatase activity | JUN kinase phosphatase activity | phosphohistidine phosphatase activity | inositol bisphosphate phosphatase activity | MAP kinase tyrosine/serine/threonine phosphatase activity | inositol-…	Haloacid dehalogenase-like hydrolase | HAD-superfamily hydrolase, subfamily IA, variant 3	3.1.3.-	Phosphoric monoester hydrolases,		Vitamin B6 metabolism	Metabolism of Cofactors and Vitamins	Predicted haloacid-halidohydrolase and related hydrolases	General function prediction only
11218	1466525	NO	9.12	7.92	1.2	1	9.56	7.44	2.12	1	0	0	0	0	0	0	transport | transporter activity | integral to membrane	MFS general substrate transporter | Major facilitator superfamily MFS-1 | Major facilitator superfamily						Vesicular amine transporter	Intracellular trafficking, secretion, and vesicular transport
11217	1459507	NO	9.14	7.73	1.41	1	9.66	7.37	2.28	0.0741822	0	0	0	0	0	0								Serine/threonine protein kinase	Signal transduction mechanisms
11216	1449836	NO	9.28	8.13	1.16	1	9.27	7.23	2.04	1	0	0	0	0	0	0
11215	1443749	YES	9.69	7.55	2.14	1	9.43	7.39	2.04	1	0	0	0	0	0	0	extracellular region | hydrolase activity, hydrolyzing O-glycosyl compounds | carbohydrate metabolic process | carbohydrate binding | chitinase activity | endochitinase activity	Glycoside hydrolase, catalytic core | Glycoside hydrolase, chitinase active site | Glycoside hydrolase, family 18, catalytic domain | Carbohydrate-binding family V/XII	3.2.1.14	Chitinase,	Hydrolysis of the 1,4-beta-linkages of N-acetyl-D-glucosamine polymers of chitin,	Aminosugars metabolism	Metabolism of Complex Carbohydrates	Chitinase	Cell wall/membrane/envelope biogenesis
11214	1095673	NO	9.64	7.97	1.67	1	9.58	6.34	3.23	4.14106e-13	0	0	0	0	0	0	transport | membrane | transporter activity | integral to membrane | sugar:hydrogen symporter activity | carbohydrate transport | L-arabinose isomerase activity	MFS general substrate transporter | Major facilitator superfamily | Sugar transporter, conserved site | General substrate transporter | Sugar transporter	5.3.1.4	L-arabinose isomerase,	L-arabinose = L-ribulose,	Pentose and glucuronate interconversions	Carbohydrate Metabolism	Predicted transporter (major facilitator superfamily)	General function prediction only
11213	176734	NO	9.64	7.86	1.78	1	8.63	7.6	1.03	1	2	0	4	0	3	0
11212	1500735	NO	9.78	8.32	1.46	1	8.73	7.16	1.56	1	0	0	0	0	0	0		Glycosyl hydrolase 92 | Alpha-1,2-mannosidase, putative
11211	1399037	NO	9.89	8.02	1.88	1	8.79	7.53	1.26	1	0	0	0	0	0	0	catalytic activity | carbohydrate metabolic process | hydrolase activity, acting on carbon-nitrogen (but not peptide) bonds	Polysaccharide deacetylase | Glycoside hydrolase/deacetylase, beta/alpha-barrel
11210	1379888	NO	10.18	8.35	1.83	1	8.41	6.88	1.53	1	0	0	0	0	0	0	electron transport | heme binding | oxidoreductase activity | transition metal ion binding | L-lactate dehydrogenase (cytochrome) activity	Cytochrome b5 | FMN-dependent alpha-hydroxy acid dehydrogenase | FMN-dependent alpha-hydroxy acid dehydrogenase, active site	1.1.2.3	L-lactate dehydrogenase (cytochrome),	(S)-lactate + 2 ferricytochrome c = pyruvate + 2 ferrocytochrome c,	Pyruvate metabolism	Carbohydrate Metabolism	Glycolate oxidase	Energy production and conversion
11209	156327	NO	9.39	8.39	1	1	9.55	8.29	1.26	1	0	0	0	0	0	0	glucan 1,4-alpha-glucosidase activity		3.2.1.3	Glucan 1,4-alpha-glucosidase,	Hydrolysis of terminal 1,4-linked alpha-D-glucose residues successively from non-reducing ends of the chains with release of beta-D-glucose,	Starch and sucrose metabolism	Metabolism of Complex Carbohydrates	Ca2+-modulated nonselective cation channel polycystin | Ca2+-modulated nonselective cation channel polycystin	Inorganic ion transport and metabolism
11208	1509830	NO	9.29	8.21	1.08	1	9.21	8.64	0.57	1	0	0	0	0	0	0
11207	1505885	NO	9.32	8.06	1.26	1	9.25	8.69	0.56	1	0	0	0	0	0	0
11206	1492169	NO	9.29	8.35	0.94	1	9.66	8.7	0.96	1	0	0	0	0	0	0		Ubiquitin interacting motif | Machado-Joseph disease protein MJD						Ataxin 3/Josephin	General function prediction only
11205	1480576	NO	9.44	8.54	0.89	1	9.18	8.27	0.91	1	0	0	0	0	0	0		Nucleoporin, Nup85-like						Nuclear pore complex component (sc Nup85) | Nuclear pore complex component (sc Nup85)	Nuclear structure
11204	1455830	NO	9.21	8.37	0.84	1	9.23	8.54	0.68	1	0	0	0	0	0	0	protein binding	Actin/actin-like						Actin and related proteins	Cytoskeleton
11203	1455335	NO	9.39	7.99	1.4	1	9.22	8.75	0.48	1	0	0	0	0	0	0	transport | transporter activity | integral to membrane	MFS general substrate transporter | Major facilitator superfamily MFS-1 | Major facilitator superfamily						Predicted transporter (major facilitator superfamily)	General function prediction only
11202	1452165	NO	9.47	8.08	1.4	1	9.7	8.75	0.95	1	0	0	0	0	0	0	ATP binding | protein kinase activity | protein amino acid phosphorylation | protein serine/threonine kinase activity | transmembrane receptor protein serine/threonine kinase activity | 3-phosphoinositide-dependent protein kinase activity | DNA-dependent protein kinase activity | AMP-activated protein kinase activity | casein kinase activity | casein kinase I activity | cyclic nucleotide-dependen…	Protein kinase-like | Protein kinase, core | Serine/threonine protein kinase-related | Serine/threonine protein kinase						3-phosphoinositide-dependent protein kinase (PDK1)	Signal transduction mechanisms
11201	1445216	NO	9.33	8.52	0.81	1	9.5	8.51	0.99	1	0	0	0	0	0	0	protein binding | cell communication | phosphoinositide binding	Phox-like | Vps5 C terminal like						Membrane coat complex Retromer, subunit VPS5/SNX1, Sorting nexins, and related PX domain-containing proteins	Intracellular trafficking, secretion, and vesicular transport
11200	1444919	NO	9.42	8.37	1.05	1	9.41	8.55	0.86	1	0	0	0	0	0	0	iron ion binding | monooxygenase activity | electron transport | heme binding | unspecific monooxygenase activity	Cytochrome P450 | Cytochrome P450, E-class, group I	1.14.14.1	Unspecific monooxygenase,	RH + reduced flavoprotein + O(2) = ROH + oxidized flavoprotein + H(2)O,	Tryptophan metabolism	Amino Acid Metabolism	Cytochrome P450 CYP2 subfamily	Secondary metabolites biosynthesis, transport and catabolism
11199	1444661	NO	9.63	8.32	1.31	1	9.19	8.49	0.69	1	0	0	0	0	0	0	hydrolase activity | isoprenoid biosynthetic process | isopentenyl-diphosphate delta-isomerase activity | thiamin diphosphokinase activity	NUDIX hydrolase, core | NUDIX | Isopentenyl-diphosphate delta-isomerase	2.7.6.2	Thiamine pyrophosphokinase,	ATP + thiamine = AMP + thiamine diphosphate,	Thiamine metabolism	Metabolism of Cofactors and Vitamins	Thiamine pyrophosphokinase	Nucleotide transport and metabolism
11198	1444358	NO	9.47	8.09	1.38	1	9.47	8.35	1.12	1	0	0	0	0	0	0	protein binding	Ankyrin | BTB/POZ-like | BTB/POZ fold | Regulator of chromosome condensation, RCC1 | Regulator of chromosome condensation/beta-lactamase-inhibitor protein II						Uncharacterized conserved protein, contains ankyrin and BTB/POZ domains	Function unknown
11197	1444343	NO	9.38	8.04	1.34	1	9.58	8.74	0.84	1	0	0	0	0	0	0	metabolic process	Pyridoxal phosphate-dependent transferase, major region | Aminotransferase, class V/Cysteine desulphurase						Cysteine desulfurase NFS1	Amino acid transport and metabolism
11196	1442161	YES	9.47	8.53	0.94	1	9.46	8.3	1.16	1	0	0	0	0	0	0
11195	1441796	NO	9.46	8.03	1.43	1	9.52	8.6	0.92	1	0	0	0	0	0	0
11194	1439924	NO	9.21	8.23	0.99	1	9.29	8.65	0.63	1	0	0	0	0	0	0	hydrolase activity	Cyclin-like | NUDIX						Transcription initiation factor TFIIIB, Brf1 subunit	Transcription
11193	1427205	NO	9.42	8.29	1.14	1	9.25	8.61	0.64	1	0	0	0	0	0	0	pyridoxal phosphate binding | amino acid metabolic process | cystathionine gamma-synthase activity	Pyridoxal phosphate-dependent transferase, major region | Cys/Met metabolism, pyridoxal phosphate-dependent enzyme						Cystathionine beta-lyases/cystathionine gamma-synthases	Amino acid transport and metabolism
11192	1407581	NO	9.34	8.41	0.93	1	9.22	8.53	0.7	1	0	0	0	0	0	0	ATP binding | nucleic acid binding | ATP-dependent helicase activity | RNA binding | helicase activity | RNA processing | ribonuclease III activity | bidentate ribonuclease III activity	DEAD-like helicase, N-terminal | Helicase, superfamily 1 and 2, ATP-binding | DNA/RNA helicase, DEAD/DEAH box type, N-terminal | DNA/RNA helicase, C-terminal | Ribonuclease III	3.1.26.-	Endoribonucleases producing 5'-phosphomonoesters,				dsRNA-specific nuclease Dicer and related ribonucleases	RNA processing and modification
11439	1071119	NO	10.31	9.8	0.51	1	10.04	8.18	1.85	1	0	0	0	0	0	0	metabolic process | electron transport | acyl-CoA dehydrogenase activity | oxidoreductase activity, acting on the CH-CH group of donors | acyl-CoA oxidase activity	Acyl-CoA dehydrogenase/oxidase, central region | Acyl-CoA dehydrogenase/oxidase C-terminal | Acyl-CoA dehydrogenase/oxidase, middle and N-terminal	1.3.3.6	Acyl-CoA oxidase,	Acyl-CoA + O(2) = trans-2,3-dehydroacyl-CoA + H(2)O(2),	Fatty acid metabolism	Lipid Metabolism	Acyl-CoA oxidase	Lipid transport and metabolism
11190	1399564	NO	9.52	8.22	1.3	1	9.51	8.24	1.28	1	0	0	0	0	0	0	G-protein coupled receptor protein signaling pathway | signal transduction | signal transducer activity | guanyl nucleotide binding	G protein alpha subunit, helical insertion | Guanine nucleotide binding protein (G-protein), alpha subunit						G-protein alpha subunit (small G protein superfamily) | G-protein alpha subunit (small G protein superfamily)	Signal transduction mechanisms
11189	1397334	NO	9.33	8.3	1.03	1	9.87	8.35	1.51	1	0	0	0	0	0	0
11188	1393813	NO	9.29	8.23	1.06	1	9.5	8.53	0.96	1	0	0	0	0	0	0	N-methyltransferase activity | DNA binding | dephosphorylation | phosphoric monoester hydrolase activity | protein tyrosine phosphatase activity | DNA methylation	Protein-tyrosine phosphatase | Protein-tyrosine phosphatase, active site | Site-specific DNA-methyltransferase (cytosine-N4-specific)
11187	919742	YES	9.59	8.52	1.07	1	9.55	8.9	0.66	1	0	0	0	0	0	0	protein binding | zinc ion binding	Zinc finger, RING-type						Predicted E3 ubiquitin ligase	Posttranslational modification, protein turnover, chaperones
11186	465826	NO	9.3	8.69	0.61	1	9.61	8.71	0.9	1	0	0	0	0	0	0		Modifier of rudimentary, Modr						Uncharacterized conserved protein	Function unknown
11185	435217	NO	9.42	8.57	0.85	1	9.5	8.97	0.53	1	0	0	0	0	0	0	transport | transporter activity | integral to membrane	MFS general substrate transporter | Major facilitator superfamily MFS-1 | Major facilitator superfamily						Predicted transporter (major facilitator superfamily)	General function prediction only
11184	188670	NO	9.85	8.77	1.08	1	9.46	8.9	0.56	1	0	0	0	0	0	0
11183	1525719	NO	9.55	8.5	1.04	1	9.43	8.77	0.66	1	0	0	0	0	0	0
11182	1512540	NO	9.27	8.42	0.85	1	9.75	8.83	0.92	1	0	0	0	0	0	0	intracellular | zinc ion binding | nucleus | nucleic acid binding | transcription factor activity | regulation of transcription, DNA-dependent	Zinc finger, C2H2-type | Zinc finger, C2H2-like | Fungal transcriptional regulatory protein, N-terminal						FOG: Zn-finger	General function prediction only
11181	1503949	NO	9.52	8.62	0.9	1	9.48	8.77	0.71	1	0	0	0	0	0	0								beta-1,6-N-acetylglucosaminyltransferase, contains WSC domain | beta-1,6-N-acetylglucosaminyltransferase, contains WSC domain	Carbohydrate transport and metabolism
11180	1501117	NO	9.93	8.74	1.19	1	9.44	8.45	1	1	0	0	0	0	0	0	nucleus | exo-alpha-sialidase activity | transcription factor activity | regulation of transcription, DNA-dependent | sequence-specific DNA binding | protein dimerization activity	Basic-leucine zipper (bZIP) transcription factor | bZIP transcription factor, bZIP-1	3.2.1.18	Exo-alpha-sialidase,	Hydrolysis of alpha-(2->3)-, alpha-(2->6)-, alpha-(2->8)-glycosidic linkages of terminal sialic residues in oligosaccharides, glycoproteins, glycolipids, colominic acid and synthetic substrates,	N-Glycan degradation	Metabolism of Complex Carbohydrates	Nucleolar GTPase/ATPase p130	Nuclear structure
11179	1475075	NO	9.54	8.86	0.68	1	9.54	8.92	0.63	1	0	0	0	0	0	0	binding | catalytic activity | metabolic process | cellular metabolic process | coenzyme binding	NAD(P)-binding | NAD-dependent epimerase/dehydratase						Uncharacterized membrane protein	Function unknown
11178	1456715	NO	9.31	8.66	0.65	1	9.3	8.56	0.73	1	0	0	0	0	0	0	integral to membrane | iron ion binding | electron transport | heme binding | succinate dehydrogenase (ubiquinone) activity | tricarboxylic acid cycle | mitochondrial envelope	CybS	1.3.5.1	Succinate dehydrogenase (ubiquinone),	Succinate + ubiquinone = fumarate + ubiquinol,	Citrate cycle (TCA cycle)	Carbohydrate Metabolism	Succinate dehydrogenase membrane anchor subunit and related proteins | Succinate dehydrogenase membrane anchor subunit and related proteins	Energy production and conversion
11177	1449591	YES	9.37	8.66	0.71	1	9.68	8.75	0.93	1	0	0	0	0	0	0
11176	1446101	NO	9.59	8.54	1.05	1	9.55	8.72	0.82	1	0	0	0	0	0	0		Protein of unknown function DUF1766						PHD Zn-finger protein	General function prediction only
11175	1444131	NO	9.45	8.53	0.92	1	9.56	8.65	0.91	1	0	0	0	0	0	0	oxidoreductase activity | C-3 sterol dehydrogenase (C-4 sterol decarboxylase) activity | 3-keto sterol reductase activity | aldo-keto reductase activity | isocitrate dehydrogenase activity | mevaldate reductase activity | gluconate dehydrogenase activity | steroid dehydrogenase activity | epoxide dehydrogenase activity | 5-exo-hydroxycamphor dehydrogenase activity | 2-hydroxytetrahydrofuran dehyd…	Aldo/keto reductase	1.1.1.-	With NAD(+) or NADP(+) as acceptor,		Bile acid biosynthesis	Lipid Metabolism	Aldo/keto reductase family proteins	General function prediction only
11174	1443906	NO	9.52	8.67	0.85	1	9.75	8.6	1.15	1	0	0	0	0	0	0		von Willebrand factor, type A						Actin regulatory protein (Wiskott-Aldrich syndrome protein) | Actin regulatory protein (Wiskott-Aldrich syndrome protein)	Signal transduction mechanisms
11173	1443362	YES	9.61	8.51	1.1	1	9.37	8.65	0.72	1	0	0	2	0	3	0	catalytic activity	Six-hairpin glycosidase-like | Uncharacterised conserved protein UCP028846
11172	1439561	NO	9.6	8.83	0.77	1	9.68	8.82	0.86	1	0	0	0	0	0	0	binding | intracellular | ARF guanyl-nucleotide exchange factor activity | regulation of ARF protein signal transduction	Armadillo-type fold | SEC7-like						Pattern-formation protein/guanine nucleotide exchange factor	Intracellular trafficking, secretion, and vesicular transport
11171	1438088	NO	9.63	8.76	0.87	1	9.37	8.81	0.56	1	0	0	0	0	0	0	glucan 1,4-alpha-glucosidase activity		3.2.1.3	Glucan 1,4-alpha-glucosidase,	Hydrolysis of terminal 1,4-linked alpha-D-glucose residues successively from non-reducing ends of the chains with release of beta-D-glucose,	Starch and sucrose metabolism	Metabolism of Complex Carbohydrates	Transcription initiation factor TFIID, subunit BDF1 and related bromodomain proteins	Transcription
11170	1419726	NO	9.5	8.54	0.96	1	9.79	9.11	0.68	1	0	0	0	0	0	0
11169	1419664	NO	9.62	8.7	0.92	1	9.32	8.66	0.67	1	0	0	0	0	0	0	metabolic process | homoaconitate hydratase activity | lysine biosynthetic process | 4 iron, 4 sulfur cluster binding	Aconitase/3-isopropylmalate dehydratase large subunit, alpha/beta/alpha | Aconitase A/isopropylmalate dehydratase small subunit, swivel | Homoaconitase, mitochondrial | Aconitase/3-isopropylmalate dehydratase, swivel	4.2.1.36	Homoaconitate hydratase,	2-hydroxybutane-1,2,4-tricarboxylate = but-1-ene-1,2,4-tricarboxylate + H(2)O,	Lysine biosynthesis	Amino Acid Metabolism	Aconitase/homoaconitase (aconitase superfamily) | Aconitase/homoaconitase (aconitase superfamily)	Amino acid transport and metabolism
11168	1400825	NO	9.44	8.35	1.09	1	9.78	8.88	0.9	1	0	0	0	0	0	0		Amino acid transporter, transmembrane						Amino acid transporters	Amino acid transport and metabolism
11167	1398587	NO	9.48	8.51	0.97	1	9.41	8.81	0.59	1	0	0	0	0	0	0								Uncharacterized conserved protein	Function unknown
11166	1591331	NO	9.77	8.86	0.91	1	9.84	8.57	1.27	1	0	0	0	0	0	0	catalytic activity | metabolic process | ligase activity | phosphopantetheine binding | cofactor binding | L-aminoadipate-semialdehyde dehydrogenase activity | aminoadipate-semialdehyde dehydrogenase complex	AMP-dependent synthetase and ligase | Phosphopantetheine attachment site | Phosphopantetheine-binding | Acyl carrier protein-like | Amino acid adenylation | Condensation domain	1.2.1.31	Aminoadipate-semialdehyde dehydrogenase,	L-2-aminoadipate 6-semialdehyde + NADP(+) + H(2)O = L-2-aminoadipate + NADPH,	Lysine biosynthesis	Amino Acid Metabolism	Non-ribosomal peptide synthetase/alpha-aminoadipate reductase and related enzymes	Secondary metabolites biosynthesis, transport and catabolism
11165	1510877	NO	9.47	9.03	0.44	1	10.11	8.79	1.33	1	0	0	0	0	0	0
11164	1503868	NO	9.7	8.95	0.76	1	9.82	8.65	1.17	1	0	0	0	0	0	0
11163	1500913	NO	9.87	8.85	1.02	1	9.88	8.7	1.18	1	0	0	0	0	0	0	ATP binding | protein kinase activity | protein amino acid phosphorylation | protein-tyrosine kinase activity | protein serine/threonine kinase activity | transmembrane receptor protein serine/threonine kinase activity | 3-phosphoinositide-dependent protein kinase activity | DNA-dependent protein kinase activity | AMP-activated protein kinase activity | casein kinase activity | casein kinase I ac…	Protein kinase ATP binding, conserved site | Protein kinase-like | Protein kinase, core | Serine/threonine protein kinase-related | Tyrosine protein kinase | Serine/threonine protein kinase | Serine/threonine protein kinase, active site | Protein kinase, C-terminal						NDR and related serine/threonine kinases	General function prediction only
11162	1459789	NO	9.73	9.31	0.43	1	10.3	8.84	1.46	1	0	0	0	0	0	0	binding | catalytic activity | metabolic process | oxidoreductase activity | acylglycerone-phosphate reductase activity	NAD(P)-binding | Glucose/ribitol dehydrogenase | Short-chain dehydrogenase/reductase SDR	1.1.1.101	Acylglycerone-phosphate reductase,	1-palmitoylglycerol 3-phosphate + NADP(+) = palmitoylglycerone phosphate + NADPH,			1-Acyl dihydroxyacetone phosphate reductase and related dehydrogenases	Secondary metabolites biosynthesis, transport and catabolism
11161	1450556	NO	10.04	9.06	0.98	1	9.94	8.62	1.32	1	0	0	0	0	0	0	metabolic process | pyridoxal phosphate binding | biosynthetic process | transferase activity, transferring nitrogenous groups | transferase activity | histidine biosynthetic process | histidinol-phosphate transaminase activity	Pyridoxal phosphate-dependent transferase, major region | Aminotransferase, class I and II | Aminotransferase, class-II, pyridoxal-phosphate binding site | Histidinol-phosphate aminotransferase	2.6.1.9	Histidinol-phosphate aminotransferase,	L-histidinol-phosphate + 2-oxoglutarate = 3-(imidazol-4-yl)-2- oxopropyl phosphate + L-glutamate,	Phenylalanine metabolism	Amino Acid Metabolism	Histidinol phosphate aminotransferase	Amino acid transport and metabolism
11160	1445426	NO	9.61	8.96	0.66	1	10.03	8.64	1.39	1	0	0	0	0	0	0
11159	1444752	NO	10.15	8.92	1.23	1	10.04	8.6	1.44	1	4	0	3	3	6	12	proteolysis | serine carboxypeptidase activity	Peptidase S10, serine carboxypeptidase	3.4.16.-	Serine-type carboxypeptidases,				Serine carboxypeptidases (lysosomal cathepsin A) | Serine carboxypeptidases (lysosomal cathepsin A)	Posttranslational modification, protein turnover, chaperones
11158	1443568	NO	9.98	9.18	0.8	1	10	8.61	1.38	1	0	0	0	0	0	0
11157	1440281	NO	10.1	9.27	0.83	1	10.24	8.8	1.43	1	0	0	0	0	0	0	licheninase activity		3.2.1.73	Licheninase,	Hydrolysis of 1,4-beta-D-glycosidic linkages in beta-D-glucans containing 1,3- and 1,4-bonds,			Chitinase	Carbohydrate transport and metabolism
11156	1411493	NO	9.86	8.8	1.06	1	9.81	8.76	1.05	1	0	0	0	0	0	0								RNA polymerase II, large subunit	Transcription
11155	1403210	NO	9.97	9.08	0.89	1	9.81	8.88	0.93	1	0	0	0	0	0	0
11154	1393210	YES	9.89	9.01	0.88	1	9.75	8.97	0.78	1	0	0	0	0	0	0
11153	1386648	NO	9.85	8.97	0.89	1	9.74	9.03	0.7	1	0	0	0	0	0	0	electron carrier activity | protein disulfide oxidoreductase activity | cell redox homeostasis	Thioredoxin-like fold | Glutaredoxin subgroup | Glutaredoxin						Glutaredoxin and related proteins	Posttranslational modification, protein turnover, chaperones
11152	1360091	NO	9.61	9.15	0.46	1	9.89	8.74	1.14	1	0	0	0	0	0	0	iron-sulfur cluster binding | structural molecule activity | iron-sulfur cluster assembly	HesB/YadR/YfhF-like | HesB/YadR/YfhF						Fe-S cluster biosynthesis protein ISA1 (contains a HesB-like domain)	Inorganic ion transport and metabolism
11151	1159549	NO	9.64	9.02	0.62	1	9.85	8.7	1.14	1	0	0	0	0	0	0	metabolic process | tryptophan biosynthetic process | transferase activity, transferring glycosyl groups | anthranilate phosphoribosyltransferase activity	Glycosyl transferase, family 3 | Glycosyl transferase, family 3, N-terminal | Anthranilate phosphoribosyl transferase	2.4.2.18	Anthranilate phosphoribosyltransferase,	Anthranilate + phosphoribosylpyrophosphate = N-5'-phosphoribosyl- anthranilate + diphosphate,	Phenylalanine, tyrosine and tryptophan biosynthesis	Amino Acid Metabolism	Anthranilate phosphoribosyltransferase	Amino acid transport and metabolism
11150	581727	NO	9.77	9.41	0.37	1	10.27	9.35	0.92	1	0	0	0	0	0	0
11149	384302	YES	9.69	9.13	0.56	1	9.92	9.13	0.79	1	0	0	0	0	2	0	binding | catalytic activity | metabolic process | electron transport | oxidoreductase activity	NAD(P)-binding | Oxidoreductase, N-terminal | Oxidoreductase, C-terminal						Predicted oxidoreductase	General function prediction only
11148	227423	NO	9.86	9.17	0.69	1	9.95	9.25	0.71	1	0	0	0	0	0	0	cysteine-type endopeptidase activity	Peptidase C54	3.4.22.-	Cysteine endopeptidases,				Cysteine protease required for autophagy - Apg4p/Aut2p | Cysteine protease required for autophagy - Apg4p/Aut2p	Cytoskeleton
11147	1534870	NO	9.82	9.24	0.57	1	10.05	9.47	0.58	1	0	0	0	0	0	0	ATP binding | ATPase activity | nucleotide binding | nucleoside-triphosphatase activity	AAA+ ATPase, core | ABC transporter-like						Lipid exporter ABCA1 and related proteins, ABC superfamily | Lipid exporter ABCA1 and related proteins, ABC superfamily	General function prediction only
8324	974645	NO	7.57	5.84	1.73	1	7.66	5.91	1.75	1	0	0	0	0	0	0	membrane | iron ion binding | lipid metabolic process | heme binding | oxidoreductase activity | transition metal ion binding | stearoyl-CoA 9-desaturase activity | endoplasmic reticulum | fatty acid biosynthetic process | oxidoreductase activity, acting on paired donors, with oxidation of a pair of donors resulting in the reduction of molecular oxygen to two molecules of water	Cytochrome b5 | Fatty acid desaturase, type 1, N-terminal | Fatty acid desaturase, type 1, C-terminal | Fatty acid desaturase, type 1, core | Fatty acid desaturase, type 1						Fatty acid desaturase	Lipid transport and metabolism
11145	1479775	NO	10.05	8.95	1.1	1	10.14	9.13	1.01	1	0	0	0	0	0	0	binding | transport | membrane	Mitochondrial substrate carrier
11144	1475636	NO	9.81	9.03	0.78	1	10.09	9.33	0.76	1	0	0	0	0	0	0
11728	1508486	NO	10.21	8.41	1.8	1	10.58	8.89	1.69	1	0	0	0	0	0	0	binding | catalytic activity | metabolic process | phosphopantetheine binding | cofactor binding	AMP-dependent synthetase and ligase | NAD(P)-binding | Phosphopantetheine attachment site | Phosphopantetheine-binding | Acyl carrier protein-like | Male sterility, NAD-binding						Long-chain acyl-CoA synthetases (AMP-forming)	Lipid transport and metabolism
11142	1448423	NO	9.71	9.17	0.53	1	9.99	9.23	0.76	1	0	0	0	0	0	0		Protein of unknown function DUF803						Uncharacterized conserved protein	Function unknown
11141	1448356	NO	9.86	9.02	0.84	1	10.16	9.44	0.72	1	0	0	0	0	0	0		Ion transport 2						Tandem pore domain K+ channel	Inorganic ion transport and metabolism
11140	1443862	NO	9.47	9.26	0.2	1	10.3	9.06	1.24	1	0	0	2	0	11	0								Predicted hydrolase related to dienelactone hydrolase	General function prediction only
11139	1443133	NO	9.74	8.57	1.18	1	10.28	9.49	0.79	1	0	0	0	0	0	0	protein binding | zinc ion binding	Zinc finger, FYVE/PHD-type | Zinc finger, PHD-type						Chromatin remodeling protein, contains PHD Zn-finger	Chromatin structure and dynamics
11138	1442801	NO	9.74	8.93	0.8	1	9.83	9.24	0.59	1	0	0	0	0	0	0		Dimeric alpha-beta barrel
11137	1441382	YES	9.71	9.09	0.61	1	10.21	9.53	0.68	1	0	0	0	0	0	0
11136	1441063	NO	9.64	9.11	0.52	1	10.08	9.36	0.72	1	0	0	0	0	0	0		Mlu1-box-binding protein, DNA-binding						Splicing coactivator SRm160/300, subunit SRm300	RNA processing and modification
11135	1400575	NO	9.86	9.33	0.53	1	10.02	9.34	0.69	1	0	0	0	0	0	0	intracellular | Rab GTPase activator activity | regulation of Rab GTPase activity	RabGAP/TBC						Ypt/Rab GTPase activating protein	Intracellular trafficking, secretion, and vesicular transport
11134	1396870	YES	9.73	9.11	0.62	1	10.14	9.2	0.94	1	0	0	0	0	0	0								Collagens (type IV and type XIII), and related proteins	Extracellular structures
11133	1385838	YES	9.96	9.24	0.72	1	10.18	9.29	0.89	1	0	0	0	0	0	0	catalytic activity | hydrolase activity, hydrolyzing O-glycosyl compounds | carbohydrate metabolic process | cellulase activity	Six-hairpin glycosidase-like | Glycoside hydrolase, family 9	3.2.1.4	Cellulase,	Endohydrolysis of 1,4-beta-D-glucosidic linkages in cellulose,	Starch and sucrose metabolism	Metabolism of Complex Carbohydrates
11132	816801	NO	10.16	9.24	0.93	1	10.28	9.56	0.72	1	0	0	0	0	0	0		Cyclin-like F-box | WD40 repeat | WD40 repeat-like						Beta-TrCP (transducin repeats containing)/Slimb proteins	Function unknown
11131	254134	YES	10.28	9.41	0.88	1	10.34	9.18	1.16	1	0	0	0	0	0	0	hydrolase activity | 5'-nucleotidase activity | IMP-GMP specific 5'-nucleotidase activity	Survival protein SurE-like phosphatase/nucleotidase	3.1.3.5	5'-nucleotidase,	A 5'-ribonucleotide + H(2)O = a ribonucleoside + phosphate,	Purine metabolism	Nucleotide Metabolism
11130	1590066	NO	10.3	9.24	1.06	1	10.01	9.16	0.85	1	0	0	0	0	0	0								Choline kinase	Cell wall/membrane/envelope biogenesis
11129	1588954	NO	10.39	9.22	1.17	1	10.16	9.5	0.66	1	0	0	0	0	0	0
11128	1549814	NO	10.3	8.84	1.46	1	10.39	9.37	1.02	1	0	0	0	0	0	0	peptidyl-prolyl cis-trans isomerase activity | cyclophilin | FK506-sensitive peptidyl-prolyl cis-trans isomerase | cyclophilin-type peptidyl-prolyl cis-trans isomerase activity	Yippee-like protein	5.2.1.8	Peptidylprolyl isomerase,	Peptidylproline (omega=180) = peptidylproline (omega=0),			Predicted Yippee-type zinc-binding protein	General function prediction only
11127	1546865	NO	10.31	9.02	1.3	1	10.26	9.26	1	1	0	0	0	0	0	0	integral to membrane	Auxin efflux carrier						Predicted membrane protein	Function unknown
11126	1506001	NO	10.33	9.04	1.28	1	10.04	9.41	0.64	1	0	0	0	0	0	0	transport | transporter activity | acid phosphatase activity | outer membrane-bounded periplasmic space	Histidine acid phosphatase | Bacterial extracellular solute-binding protein, family 3	3.1.3.2	Acid phosphatase,	An orthophosphoric monoester + H(2)O = an alcohol + phosphate,	gamma-Hexachlorocyclohexane degradation	Biodegradation of Xenobiotics	Multiple inositol polyphosphate phosphatase	General function prediction only
11125	1487447	NO	10.09	9.41	0.68	1	10.29	9.28	1	1	0	0	0	0	0	0	intracellular | GTP binding | small GTPase MEANted signal transduction | protein transport	Ras GTPase | Ras | Ras small GTPase, Ras type | Ras small GTPase, Rho type | Ras small GTPase, Rab type | Small GTP-binding protein						Ras-related GTPase	General function prediction only
11124	1481205	NO	10.79	9.37	1.43	1	10.3	9.39	0.9	1	0	0	0	0	0	0	ATP binding | protein kinase activity | protein amino acid phosphorylation | protein-tyrosine kinase activity | protein serine/threonine kinase activity | protein kinase CK2 activity	Protein kinase-like | Protein kinase, core | Serine/threonine protein kinase-related | Tyrosine protein kinase | Serine/threonine protein kinase | Serine/threonine protein kinase, active site						Tyrosine kinase specific for activated (GTP-bound) p21cdc42Hs	Signal transduction mechanisms
11123	1469311	NO	10.35	9.58	0.77	1	10.26	9.29	0.98	1	0	0	0	0	0	0	hydrolase activity, hydrolyzing O-glycosyl compounds | carbohydrate metabolic process | alpha-glucosidase activity	Glycoside hydrolase, catalytic core | Glycoside hydrolase, family 31	3.2.1.20	Alpha-glucosidase,	Hydrolysis of terminal, non-reducing 1,4-linked D-glucose residues with release of D-glucose,	Galactose metabolism	Carbohydrate Metabolism	Maltase glucoamylase and related hydrolases, glycosyl hydrolase family 31	Carbohydrate transport and metabolism
11122	1458534	NO	10.51	9.52	0.99	1	10.3	9.48	0.82	1	0	0	0	0	0	0	xylulokinase activity		2.7.1.17	Xylulokinase,	ATP + D-xylulose = ADP + D-xylulose 5-phosphate,	Pentose and glucuronate interconversions	Carbohydrate Metabolism	Sugar (pentulose and hexulose) kinases	Carbohydrate transport and metabolism
11121	1455602	NO	10.17	9.01	1.15	1	10.17	9.61	0.56	1	0	0	0	0	0	0	histone acetyltransferase activity	Galactose oxidase/kelch, beta-propeller | Kelch repeat type 2	2.3.1.48	Histone acetyltransferase,	Acetyl-CoA + histone = CoA + acetyl-histone,			CREB binding protein/P300 and related TAZ Zn-finger proteins	Transcription
11120	1449987	NO	10.12	9.36	0.75	1	10.39	9.45	0.94	1	0	0	0	0	0	0		MFS general substrate transporter | Major facilitator superfamily MFS-1
11119	1445878	NO	10.41	9.51	0.9	1	10.13	9.46	0.68	1	0	0	0	0	0	0	transport | transporter activity | integral to membrane	MFS general substrate transporter | Major facilitator superfamily MFS-1 | Major facilitator superfamily						Permease of the major facilitator superfamily	General function prediction only
11118	1445680	NO	10.05	9.08	0.98	1	10.38	9.52	0.86	1	0	0	0	0	0	0		MFS general substrate transporter						Predicted transporter ADD1 (major facilitator superfamily)	General function prediction only
11117	1445600	NO	10.19	9.26	0.92	1	10.01	9.51	0.49	1	0	0	0	0	0	0	nucleic acid binding	Polynucleotidyl transferase, Ribonuclease H fold | Argonaute and Dicer protein, PAZ | Stem cell self-renewal protein Piwi | Region of unknown function DUF1785						Translation initiation factor 2C (eIF-2C) and related proteins	Translation, ribosomal structure and biogenesis
11116	1444841	NO	10.03	9.26	0.77	1	10.17	9.32	0.85	1	0	0	0	0	0	0
11115	1444557	NO	10.6	9.3	1.3	1	10.49	9.2	1.29	1	0	0	0	0	0	0
11114	1443092	NO	10.23	9.15	1.08	1	10.09	9.35	0.74	1	0	0	0	0	0	0	integral to membrane | regulation of pH | solute:hydrogen antiporter activity	Sodium/hydrogen exchanger						Predicted K+/H+-antiporter	Inorganic ion transport and metabolism
11113	1441931	NO	10.24	9.36	0.87	1	10.09	9.22	0.87	1	0	0	0	0	0	0	ubiquitin cycle | ubiquitin-dependent protein catabolic process | ubiquitin thiolesterase activity | S-formylglutathione hydrolase activity	Peptidase C19, ubiquitin carboxyl-terminal hydrolase 2 | Ubiquitin carboxyl-terminal hydrolase, N-terminal region 2 | Ubiquitin carboxyl-terminal hydrolase, N-terminal region 1	3.1.2.12	S-formylglutathione hydrolase,	S-formylglutathione + H(2)O = glutathione + formate,	Methane metabolism	Energy Metabolism	Ubiquitin C-terminal hydrolase	Posttranslational modification, protein turnover, chaperones
11112	1441538	NO	10.38	9.04	1.34	1	10.21	9.24	0.97	1	0	0	0	0	0	0	peptidyl-prolyl cis-trans isomerase activity | cyclophilin | FK506-sensitive peptidyl-prolyl cis-trans isomerase | cyclophilin-type peptidyl-prolyl cis-trans isomerase activity	Yippee-like protein	5.2.1.8	Peptidylprolyl isomerase,	Peptidylproline (omega=180) = peptidylproline (omega=0),			Predicted Yippee-type zinc-binding protein	General function prediction only
11111	1441364	NO	10.38	9.44	0.95	1	10.15	9.55	0.6	1	0	0	0	0	0	0	electron transport | heme binding | oxidoreductase activity | transition metal ion binding | L-lactate dehydrogenase (cytochrome) activity	Cytochrome b5 | FMN-dependent alpha-hydroxy acid dehydrogenase | FMN-dependent alpha-hydroxy acid dehydrogenase, active site	1.1.2.3	L-lactate dehydrogenase (cytochrome),	(S)-lactate + 2 ferricytochrome c = pyruvate + 2 ferrocytochrome c,	Pyruvate metabolism	Carbohydrate Metabolism	Glycolate oxidase	Energy production and conversion
11110	1439390	NO	10.07	9.06	1.01	1	10.43	9.33	1.1	1	0	0	0	0	0	0
11109	1438933	NO	10.35	9.5	0.85	1	10.39	9.38	1	1	0	0	0	0	0	0	nucleotidyltransferase activity | biosynthetic process | NAD biosynthetic process | nicotinamide-nucleotide adenylyltransferase activity	Cytidylyltransferase | Probable nicotinate-nucleotide adenylyltransferase	2.7.7.1	Nicotinamide-nucleotide adenylyltransferase,	ATP + nicotinamide ribonucleotide = diphosphate + NAD(+),	Nicotinate and nicotinamide metabolism	Metabolism of Cofactors and Vitamins	Nicotinamide mononucleotide adenylyl transferase	Coenzyme transport and metabolism
11108	1438154	NO	10.09	9.36	0.72	1	10.57	9.47	1.1	1	0	0	0	0	0	0
11107	1390662	NO	10.21	9.29	0.93	1	10.2	9.33	0.87	1	0	0	0	0	0	0	methylenetetrahydrofolate reductase (NADPH) activity | methionine metabolic process	Methylenetetrahydrofolate reductase | Eukaryotic-type methylenetetrahydrofolate reductase	1.5.1.20	Methylenetetrahydrofolate reductase (NADPH),	5-methyltetrahydrofolate + NADP(+) = 5,10-methylenetetrahydrofolate + NADPH,			5,10-methylenetetrahydrofolate reductase	Amino acid transport and metabolism
11106	1385962	NO	10.22	9.24	0.98	1	10.14	9.28	0.86	1	0	0	0	0	0	0	catalytic activity | metabolic process | ligase activity | acetate-CoA ligase activity	AMP-dependent synthetase and ligase | Amino acid adenylation	6.2.1.1	Acetate--CoA ligase,	ATP + acetate + CoA = AMP + diphosphate + acetyl-CoA,	Reductive carboxylate cycle (CO2 fixation)	Energy Metabolism	Non-ribosomal peptide synthetase/alpha-aminoadipate reductase and related enzymes	Secondary metabolites biosynthesis, transport and catabolism
11105	1030893	NO	10.17	9.21	0.95	1	10.07	9.14	0.93	1	0	0	0	0	0	0	binding | catalytic activity | metabolic process | oxidoreductase activity | carbonyl reductase (NADPH) activity	NAD(P)-binding | Glucose/ribitol dehydrogenase | Short-chain dehydrogenase/reductase SDR	1.1.1.184	Carbonyl reductase (NADPH),	R-CHOH-R' + NADP(+) = R-CO-R' + NADPH,	Prostaglandin and leukotriene metabolism	Metabolism of Complex Lipids	Reductases with broad range of substrate specificities	General function prediction only
11104	1503787	NO	10.18	9.13	1.05	1	11.28	9.48	1.8	1	0	0	0	0	5	0	oxidoreductase activity | C-3 sterol dehydrogenase (C-4 sterol decarboxylase) activity | 3-keto sterol reductase activity | aldo-keto reductase activity | isocitrate dehydrogenase activity | mevaldate reductase activity | gluconate dehydrogenase activity | steroid dehydrogenase activity | epoxide dehydrogenase activity | 5-exo-hydroxycamphor dehydrogenase activity | 2-hydroxytetrahydrofuran dehyd…	Aldo/keto reductase	1.1.1.-	With NAD(+) or NADP(+) as acceptor,		Bile acid biosynthesis	Lipid Metabolism	Aldo/keto reductase family proteins	General function prediction only
11103	1503353	YES	9.86	9.17	0.69	1	10.6	9.84	0.76	1	0	0	0	0	0	0
11102	1501735	NO	9.87	9.41	0.46	1	10.68	9.66	1.02	1	0	0	0	0	0	0	binding	Armadillo-type fold | HEAT						Protein phosphatase 2A regulatory subunit A and related proteins	Signal transduction mechanisms
11101	1500306	NO	9.72	8.87	0.85	1	11.38	9.59	1.79	1	0	0	0	0	0	0
11100	1479710	NO	9.84	9.3	0.54	1	11.12	10.3	0.81	1	0	0	0	0	0	0	hydrolase activity, acting on carbon-nitrogen (but not peptide) bonds	Amidohydrolase 3 | Metal-dependent hydrolase, composite
11099	1464881	YES	10.09	9.06	1.03	1	10.9	9.71	1.19	1	0	0	0	0	0	0		Concanavalin A-like lectin/glucanase
11098	1454408	NO	9.52	9.5	0.02	1	10.56	10.13	0.43	1	0	0	0	0	0	0
11097	1401897	YES	10.06	9.48	0.58	1	11.55	10.17	1.38	1	0	0	0	0	0	0		Ricin B-related lectin
11096	1400114	NO	9.52	9.18	0.34	1	11.05	10.08	0.97	1	0	0	0	0	6	0	binding | catalytic activity | metabolic process | NADPH:quinone reductase activity	NAD(P)-binding | Alcohol dehydrogenase, zinc-binding | Alcohol dehydrogenase GroES-like | GroES-like	1.6.5.5	NADPH:quinone reductase,	NADPH + quinone = NADP(+) + semiquinone,			Zinc-binding oxidoreductase | Zinc-binding oxidoreductase	Energy production and conversion
11095	1396745	NO	9.48	9.18	0.3	1	11.22	10.21	1	1	0	0	0	0	7	0	oxidoreductase activity | peroxiredoxin activity	Thioredoxin-like fold | Redoxin						Alkyl hydroperoxide reductase/peroxiredoxin	Posttranslational modification, protein turnover, chaperones
11094	54657	NO	10.57	10.06	0.51	1	10.68	9.76	0.92	1	0	0	0	0	2	0		Protein of unknown function DUF52						Predicted dioxygenase	General function prediction only
11093	391156	NO	10.75	10.38	0.37	1	10.72	9.47	1.25	1	0	0	0	0	0	0		Alpha/beta hydrolase fold-1
11092	1510199	YES	10.84	9.97	0.87	1	10.63	9.73	0.9	1	6	0	12	0	9	0	proteolysis | serine carboxypeptidase activity	Peptidase S10, serine carboxypeptidase	3.4.16.-	Serine-type carboxypeptidases,				Serine carboxypeptidases (lysosomal cathepsin A) | Serine carboxypeptidases (lysosomal cathepsin A)	Posttranslational modification, protein turnover, chaperones
11091	1509725	NO	10.61	9.91	0.7	1	10.45	9.64	0.82	1	0	0	0	0	0	0								Serine/threonine protein kinase	Signal transduction mechanisms
11090	1505766	NO	10.58	10	0.58	1	10.48	9.37	1.11	1	0	0	0	0	0	0
11089	1503021	NO	10.66	9.97	0.69	1	10.81	9.21	1.6	1	0	0	0	0	0	0	transport | transporter activity | integral to membrane	MFS general substrate transporter | Major facilitator superfamily MFS-1 | Major facilitator superfamily						Synaptic vesicle transporter SVOP and related transporters (major facilitator superfamily)	General function prediction only
11088	1482575	NO	10.76	10.34	0.42	1	10.44	9.44	1	1	0	0	0	0	0	0	binding | catalytic activity | metabolic process | oxidoreductase activity, acting on the CH-OH group of donors, NAD or NADP as acceptor | NAD binding | cofactor binding	NAD(P)-binding | D-isomer specific 2-hydroxyacid dehydrogenase, NAD-binding | D-isomer specific 2-hydroxyacid dehydrogenase, catalytic region						Glyoxylate/hydroxypyruvate reductase (D-isomer-specific 2-hydroxy acid dehydrogenase superfamily)	Energy production and conversion
11087	1481068	NO	10.63	9.95	0.68	1	10.62	9.79	0.83	1	0	0	0	0	0	0	ATP binding | translation | cytoplasm | alanine-tRNA ligase activity | alanyl-tRNA aminoacylation	Alanyl-tRNA synthetase, class IIc	6.1.1.7	Alanine--tRNA ligase,	ATP + L-alanine + tRNA(Ala) = AMP + diphosphate + L-alanyl-tRNA(Ala),	Alanine and aspartate metabolism	Amino Acid Metabolism	Predicted metal-dependent hydrolase, contains AlaS domain	General function prediction only
11086	1458092	NO	10.39	9.99	0.4	1	10.65	9.55	1.11	1	0	0	0	0	0	0	signal transduction | signal transducer activity | two-component sensor activity | histone arginine kinase activity	Signal transduction histidine kinase, phosphotransfer (Hpt) region	2.7.3.-	Phosphotransferases with a nitrogenous group as acceptor,		Type II secretion system	SORTING AND DEGRADATION	Two-component phosphorelay interMEANte involved in MAP kinase cascade regulation	Signal transduction mechanisms
11085	1457010	NO	10.76	9.76	0.99	1	10.5	9.52	0.97	1	0	0	0	0	0	0
11084	1451628	NO	10.97	10.2	0.77	1	10.75	9.64	1.11	1	0	0	0	0	5	0	catalytic activity | metabolic process	Mandelate racemase/muconate lactonizing enzyme, C-terminal | Mandelate racemase/muconate lactonizing enzyme
11083	1445032	NO	10.66	10.04	0.63	1	10.79	9.83	0.96	1	0	0	0	0	4	0								Cdc2-related protein kinase	Cell cycle control, cell division, chromosome partitioning
11082	1442030	NO	10.86	10.17	0.69	1	10.81	9.58	1.24	1	0	0	0	0	2	0	binding | catalytic activity | metabolic process | oxidoreductase activity | trans-1,2-dihydrobenzene-1,2-diol dehydrogenase activity	NAD(P)-binding | Oxidoreductase, N-terminal	1.3.1.20	Trans-1,2-dihydrobenzene-1,2-diol dehydrogenase,	Trans-1,2-dihydrobenzene-1,2-diol + NADP(+) = catechol + NADPH,			Dimeric dihydrodiol dehydrogenase | Dimeric dihydrodiol dehydrogenase	Carbohydrate transport and metabolism
11081	1440579	NO	10.42	10	0.42	1	10.61	9.79	0.82	1	0	0	0	0	0	0	proteolysis | oxidoreductase activity | aspartic-type endopeptidase activity | aldehyde reductase activity	Peptidase aspartic, active site | Aldo/keto reductase	1.1.1.21	Aldehyde reductase,	Alditol + NAD(P)(+) = aldose + NAD(P)H,	Galactose metabolism	Carbohydrate Metabolism	Aldo/keto reductase family proteins	General function prediction only
11080	1439027	NO	10.71	9.73	0.99	1	10.61	9.55	1.06	1	0	0	0	0	0	0	zinc ion binding | nucleus | transcription factor activity | regulation of transcription, DNA-dependent | DNA binding | transcription	Fungal transcriptional regulatory protein, N-terminal | Fungal specific transcription factor						WASP-interacting protein VRP1/WIP, contains WH2 domain	Cytoskeleton
11079	1437759	NO	10.65	10	0.65	1	10.73	9.6	1.13	1	0	0	0	0	0	0	hydrolase activity | metabolic process	Alpha/beta hydrolase fold-3 | Lipase, GDXG, active site						Arylacetamide deacetylase	Defense mechanisms
11078	1412382	NO	10.65	9.74	0.91	1	10.57	9.52	1.04	1	0	0	0	0	0	0	electron transport | oxidoreductase activity	2-nitropropane dioxygenase, NPD
11077	1394703	NO	10.33	10.06	0.27	1	10.87	9.92	0.96	1	0	0	0	0	0	0
11076	1378840	NO	10.57	9.76	0.82	1	10.6	9.69	0.92	1	0	0	0	0	0	0	metabolic process | lipid metabolic process | lysophospholipase activity | endoplasmic reticulum membrane | phosphatidylcholine metabolic process	Acyl transferase/acyl hydrolase/lysophospholipase | Cyclic nucleotide-binding | Patatin | Lysophospholipase patatin, conserved site						Predicted esterase of the alpha-beta hydrolase superfamily (Neuropathy target esterase), contains cAMP-binding domains	General function prediction only
11075	1137538	NO	10.39	10.06	0.33	1	10.7	9.51	1.19	1	0	0	0	0	0	0
11074	1510188	NO	11.16	9.59	1.57	1	10.57	10.34	0.23	1	0	0	4	0	0	0	catalytic activity | glucan 1,4-alpha-glucosidase activity | polysaccharide metabolic process	Six-hairpin glycosidase-like | Glycoside hydrolase 15-related
9367	1441915	NO	7.52	7.33	0.2	1	8.61	6.98	1.63	1	0	0	0	0	0	0	phospholipid biosynthetic process | phosphatidylserine decarboxylase activity	Phosphatidylserine decarboxylase-related						Phosphatidylserine decarboxylase	Lipid transport and metabolism
11072	1479221	NO	10.83	9.78	1.05	1	10.48	10.11	0.37	1	0	0	0	0	0	0	transport | transporter activity | integral to membrane	MFS general substrate transporter | Major facilitator superfamily MFS-1 | Major facilitator superfamily						Permease of the major facilitator superfamily	Carbohydrate transport and metabolism
11071	1450938	NO	11.03	9.63	1.4	1	10.74	10.57	0.17	1	0	0	0	0	0	0	O-methyltransferase activity	O-methyltransferase, family 2						Hydroxyindole-O-methyltransferase and related SAM-dependent methyltransferases	General function prediction only
11070	1446774	NO	10.87	9.71	1.17	1	10.53	10.62	-0.09	1	0	0	0	0	0	0	zinc ion binding | nucleus | transcription factor activity | regulation of transcription, DNA-dependent | DNA binding | transcription	Fungal transcriptional regulatory protein, N-terminal | Fungal specific transcription factor
11069	1442970	NO	11.16	9.63	1.54	1	11.2	10.21	0.99	1	0	0	0	0	0	0	regulation of transcription, DNA-dependent | DNA binding	High mobility group box, HMG1/HMG2 | High mobility group box, HMG						HMG box-containing protein	General function prediction only
11068	1438562	NO	10.95	9.75	1.21	1	10.64	10.79	-0.15	1	0	0	0	0	0	0								Serine/threonine protein kinase	Signal transduction mechanisms
11067	1381069	NO	11.09	9.89	1.2	1	10.7	10.58	0.12	1	0	0	20	0	18	0	proteolysis | cytoplasm | dipeptidyl-peptidase III activity	Peptidase M49, dipeptidyl-peptidase III | Peptidase M49, dipeptidyl-peptidase 3, eukaryotic	3.4.14.4	Dipeptidyl-peptidase III,	Release of a N-terminal dipeptide from a peptide of four or more residues, with broad specificity,			Dipeptidyl peptidase III	General function prediction only
11066	951657	NO	11.63	10.89	0.74	1	11.98	10.82	1.16	1	0	0	0	0	5	0	binding | catalytic activity | metabolic process | oxidoreductase activity	NAD(P)-binding | Oxidoreductase, N-terminal | Oxidoreductase putative, C-terminal
11065	1576607	NO	11.27	10.54	0.73	1	11.5	10.45	1.05	1	3	0	0	0	3	0		Phosphatidylethanolamine-binding protein PEBP						Phosphatidylethanolamine binding protein	General function prediction only
11064	1513266	NO	11.65	10.73	0.92	1	10.98	10.45	0.54	1	0	0	0	0	0	0	regulation of transcription, DNA-dependent | DNA binding	High mobility group box, HMG1/HMG2 | High mobility group box, HMG						HMG-box transcription factor	Transcription
11063	1510973	NO	11.62	10.32	1.31	1	11.87	10.45	1.41	1	0	0	9	0	20	0	electron transport | oxidoreductase activity | FAD binding | F420H2 dehydrogenase activity | sulfur oxygenase reductase activity | malolactic enzyme activity | regulation of oxidoreductase activity	FAD-dependent pyridine nucleotide-disulphide oxidoreductase | Pyridine nucleotide-disulphide oxidoreductase, NAD-binding region | Pyridine nucleotide-disulphide oxidoreductase, class I | FAD/NAD-linked reductase, dimerisation | Rieske [2Fe-2S] region	1.-.-.-	Oxidoreductases,				Monodehydroascorbate/ferredoxin reductase	General function prediction only
11062	1500253	YES	11.57	10.81	0.76	1	11.22	10.55	0.67	1	0	0	0	0	0	0	hydrolase activity, hydrolyzing O-glycosyl compounds | carbohydrate metabolic process	Concanavalin A-like lectin/glucanase | Glycoside hydrolase, family 16 | Beta-glucan synthesis-associated, SKN1
11061	1481066	NO	11.46	10.71	0.75	1	11.29	10.43	0.86	1	0	0	0	0	0	0	hydrolase activity, hydrolyzing O-glycosyl compounds | carbohydrate metabolic process | beta-mannosidase activity	Glycoside hydrolase, catalytic core | Galactose-binding like | Glycoside hydrolase family 2, immunoglobulin-like beta-sandwich	3.2.1.25	Beta-mannosidase,	Hydrolysis of terminal, non-reducing beta-D-mannose residues in beta-D-mannosides,	N-Glycan degradation	Metabolism of Complex Carbohydrates	Predicted beta-mannosidase	Carbohydrate transport and metabolism
11060	1476846	NO	11.7	10.61	1.09	1	11.77	10.51	1.26	1	0	0	10	0	17	0	electron transport | oxidoreductase activity | FMN binding | (S)-2-hydroxy-acid oxidase activity | glycolate oxidase activity | glycolate oxidase complex	FMN-dependent alpha-hydroxy acid dehydrogenase | FMN-dependent alpha-hydroxy acid dehydrogenase, active site | Alpha-hydroxy acid dehydrogenase, FMN-dependent	1.1.3.15	(S)-2-hydroxy-acid oxidase,	(S)-2-hydroxy-acid + O(2) = 2-oxo acid + H(2)O(2),	Glyoxylate and dicarboxylate metabolism	Carbohydrate Metabolism	Glycolate oxidase	Energy production and conversion
11059	1468331	NO	11.24	10.67	0.57	1	11.34	10.54	0.8	1	0	0	0	0	0	0								Golgi-associated protein/Nedd4 WW domain-binding protein	General function prediction only
11058	1456388	NO	11.57	11	0.57	1	11.66	10.65	1.01	1	0	0	12	0	19	0		Thioredoxin-like fold | Glutathione S-transferase, C-terminal | Glutathione S-transferase, C-terminal-like | Glutathione S-transferase, predicted						Predicted glutathione S-transferase	Posttranslational modification, protein turnover, chaperones
11057	1447180	NO	11.65	10.89	0.75	1	11.4	10.9	0.51	1	0	0	0	0	0	0								Collagens (type IV and type XIII), and related proteins	Extracellular structures
11056	1446187	NO	11.33	10.78	0.55	1	11.34	10.19	1.14	1	0	0	2	0	2	0	ATP binding | nucleic acid binding | nucleotide binding | translation | cytoplasm | aminoacyl-tRNA ligase activity | tRNA aminoacylation for protein translation | lysine-tRNA ligase activity | lysyl-tRNA aminoacylation	Nucleic acid-binding, OB-fold-like | Aminoacyl-tRNA synthetase, class II | Aminoacyl-tRNA synthetase, class II (D, K and N) | Nucleic acid binding, OB-fold, tRNA/helicase-type | Lysyl-tRNA synthetase, class II	6.1.1.6	Lysine--tRNA ligase,	ATP + L-lysine + tRNA(Lys) = AMP + diphosphate + L-lysyl-tRNA(Lys),	Lysine biosynthesis	Amino Acid Metabolism	Lysyl-tRNA synthetase (class II)	Translation, ribosomal structure and biogenesis
11055	1443059	NO	11.33	10.75	0.59	1	11.24	10.56	0.68	1	0	0	0	0	0	0	transport | transporter activity | integral to membrane	MFS general substrate transporter | Major facilitator superfamily MFS-1 | Major facilitator superfamily						Permease of the major facilitator superfamily	Carbohydrate transport and metabolism
11054	1442576	NO	11.79	10.56	1.23	1	11.96	10.63	1.33	1	10	0	15	0	26	0	carbohydrate metabolic process | pentose-phosphate shunt | cytoplasm | transaldolase activity	Transaldolase | Transaldolase AB	2.2.1.2	Transaldolase,	Sedoheptulose 7-phosphate + D-glyceraldehyde 3-phosphate = D-erythrose 4-phosphate + D-fructose 6-phosphate,	Pentose phosphate pathway	Carbohydrate Metabolism	Transaldolase	Carbohydrate transport and metabolism
11053	1440061	NO	11.48	11.13	0.35	1	11.57	10.63	0.94	1	0	0	0	0	0	0	3-(2,3-dihydroxyphenyl)propionate 1,2-dioxygenase activity | 1,2-dihydroxynaphthalene dioxygenase activity	Cupin, RmlC-type | Acireductone dioxygenase, ARD	1.13.-.-	Acting on single donors with incorporation of molecular oxygen,				Uncharacterized conserved protein, contains double-stranded beta-helix domain	Function unknown
11400	1481556	YES	11.26	9.65	1.61	1	11.33	9.72	1.61	1	0	0	0	0	0	0	catalytic activity | lipid metabolic process | triacylglycerol lipase activity | phospholipase activity | lipase activity | 1-oxa-2-oxocycloheptane lactonase activity | sulfolactone hydrolase activity | 3,4-dihydrocoumarin hydrolase activity | butyrolactone hydrolase activity	Lipase, class 3 | Lipase, active site	3.1.1.-	Carboxylic ester hydrolases,		2,4-Dichlorobenzoate degradation	Biodegradation of Xenobiotics	Predicted lipase	Lipid transport and metabolism
11051	1437718	NO	11.05	10.95	0.1	1	11.63	10.63	0.99	1	0	0	4	0	6	0	catalytic activity | metabolic process | carboxylic acid metabolic process | isocitrate lyase activity	Isocitrate lyase and phosphorylmutase, core | Isocitrate lyase and phosphorylmutase | Pyruvate/Phosphoenolpyruvate kinase, catalytic core | Isocitrate lyase	4.1.3.1	Isocitrate lyase,	Isocitrate = succinate + glyoxylate,	Glyoxylate and dicarboxylate metabolism	Carbohydrate Metabolism	Isocitrate lyase	Energy production and conversion
11050	1420160	YES	11.34	10.71	0.63	1	11.65	10.75	0.9	1	0	0	0	0	0	0		Phosphatidylethanolamine-binding protein PEBP						Phosphatidylethanolamine binding protein	General function prediction only
11049	1417430	NO	11.6	10.43	1.17	1	11.13	10.76	0.37	1	0	0	0	0	0	0	zinc ion binding | nucleus | transcription factor activity | regulation of transcription, DNA-dependent | DNA binding | transcription	Fungal transcriptional regulatory protein, N-terminal | Fungal specific transcription factor
11048	1387810	NO	11.75	10.65	1.1	1	11.54	10.56	0.97	1	0	0	0	0	0	0	binding | catalytic activity | metabolic process | cofactor binding | L-aminoadipate-semialdehyde dehydrogenase activity | aminoadipate-semialdehyde dehydrogenase complex	AMP-dependent synthetase and ligase | NAD(P)-binding | Phosphopantetheine-binding | Acyl carrier protein-like | Male sterility, NAD-binding	1.2.1.31	Aminoadipate-semialdehyde dehydrogenase,	L-2-aminoadipate 6-semialdehyde + NADP(+) + H(2)O = L-2-aminoadipate + NADPH,	Lysine biosynthesis	Amino Acid Metabolism	Non-ribosomal peptide synthetase/alpha-aminoadipate reductase and related enzymes	Secondary metabolites biosynthesis, transport and catabolism
11047	1387790	NO	11.42	10.67	0.75	1	11.55	10.9	0.65	1	0	0	0	0	0	0	UDP-N-acetylmuramoylalanyl-D-glutamyl-2,6-diaminopimelate-D-alanyl-D-alanine ligase activity | ribosomal S6-glutamic acid ligase activity | coenzyme F420-0 gamma-glutamyl ligase activity | coenzyme F420-2 alpha-glutamyl ligase activity		6.3.2.-	Acid--D-amino-acid ligases (peptide synthases),		Tryptophan metabolism	Amino Acid Metabolism	Serine/threonine protein kinase	Signal transduction mechanisms
11046	1381884	NO	11.37	10.71	0.66	1	11.69	10.82	0.87	1	0	0	0	0	0	0	transport | transporter activity | integral to membrane	MFS general substrate transporter | Major facilitator superfamily MFS-1 | Major facilitator superfamily						Predicted transporter ADD1 (major facilitator superfamily)	General function prediction only
11045	1240086	NO	11.59	10.93	0.66	1	11.68	10.86	0.82	1	0	0	0	0	0	0
11044	1047340	NO	11.84	10.42	1.42	1	11.83	10.73	1.1	1	0	0	0	0	0	0	binding | zinc ion binding | catalytic activity | metabolic process | oxidoreductase activity | L-iditol 2-dehydrogenase activity	NAD(P)-binding | Alcohol dehydrogenase, zinc-binding | Alcohol dehydrogenase GroES-like | GroES-like | Alcohol dehydrogenase, zinc-containing, conserved site	1.1.1.14	L-iditol 2-dehydrogenase,	L-iditol + NAD(+) = L-sorbose + NADH,	Fructose and mannose metabolism	Carbohydrate Metabolism	Sorbitol dehydrogenase	Secondary metabolites biosynthesis, transport and catabolism
11043	1531101	NO	11.95	11.21	0.74	1	12.15	10.47	1.68	1	0	0	0	0	0	0	zinc ion binding | nucleus | transcription factor activity | regulation of transcription, DNA-dependent | sequence-specific DNA binding	Zinc finger, GATA-type						GATA-4/5/6 transcription factors	Transcription
11042	1513081	NO	11.66	11.66	0	1	11.94	10.13	1.82	1	0	0	0	0	0	0	metal ion binding | hydrolase activity, acting on carbon-nitrogen (but not peptide) bonds, in linear amidines | arginase activity | arginine catabolic process	Ureohydrolase | Arginase | Arginase, subgroup	3.5.3.1	Arginase,	L-arginine + H(2)O = L-ornithine + urea,	Urea cycle and metabolism of amino groups	Amino Acid Metabolism	Arginase	Amino acid transport and metabolism
11041	1501031	YES	11.66	11.14	0.53	1	12.37	10.34	2.03	1	0	0	3	2	0	2								Nuclear localization sequence binding protein	Transcription
11040	1491172	NO	10.5	11.05	-0.56	1	12.05	9.83	2.22	1	0	0	6	0	7	0	binding | catalytic activity | metabolic process | regulation of nitrogen utilization | transcription repressor activity	NAD(P)-binding | NmrA-like						Flavonol reductase/cinnamoyl-CoA reductase	Defense mechanisms
11039	1465470	NO	11.45	11.15	0.3	1	12.11	10.82	1.29	1	0	0	8	0	7	0	membrane	Stomatin | Band 7 protein						Prohibitins and stomatins of the PID superfamily	Energy production and conversion
11038	1456126	NO	11.28	11.47	-0.19	1	11.91	10.87	1.03	1	0	0	0	0	4	0	response to oxidative stress | glutathione peroxidase activity	Thioredoxin-like fold | Glutathione peroxidase						Glutathione peroxidase	Posttranslational modification, protein turnover, chaperones
11037	1446410	NO	11.24	11.79	-0.55	1	11.82	10.27	1.55	1	6	0	9	0	18	0	oxidoreductase activity | C-3 sterol dehydrogenase (C-4 sterol decarboxylase) activity | 3-keto sterol reductase activity | aldo-keto reductase activity | isocitrate dehydrogenase activity | mevaldate reductase activity | gluconate dehydrogenase activity | steroid dehydrogenase activity | epoxide dehydrogenase activity | 5-exo-hydroxycamphor dehydrogenase activity | 2-hydroxytetrahydrofuran dehyd…	Aldo/keto reductase	1.1.1.-	With NAD(+) or NADP(+) as acceptor,		Bile acid biosynthesis	Lipid Metabolism	Aldo/keto reductase family proteins	General function prediction only
11036	1405209	NO	11.3	10.87	0.43	1	11.79	10.1	1.69	1	0	0	0	0	0	0	iron ion binding | oxidoreductase activity | oxalate oxidase activity	2OG-Fe(II) oxygenase | Isopenicillin N synthase	1.2.3.4	Oxalate oxidase,	Oxalate + O(2) = 2 CO(2) + H(2)O(2),	Glyoxylate and dicarboxylate metabolism	Carbohydrate Metabolism	Iron/ascorbate family oxidoreductases | Iron/ascorbate family oxidoreductases	General function prediction only
11035	1401298	YES	11.21	11.3	-0.09	1	11.96	10.18	1.78	1	0	0	0	0	0	0
11034	1393341	NO	11.67	10.89	0.78	1	12.12	10.57	1.55	1	0	0	2	0	5	0
11033	1194935	NO	11.68	10.86	0.82	1	12.89	10.24	2.65	0.965116	0	0	0	0	0	0
11032	405495	YES	12.52	11.04	1.48	1	11.75	11.92	-0.16	1	0	0	0	0	0	0	extracellular region | ion channel inhibitor activity | pathogenesis	Scorpion short chain toxin
11031	1594201	NO	11.69	11.37	0.32	1	12.11	11.51	0.59	1	0	0	0	0	10	0	oxidoreductase activity | C-3 sterol dehydrogenase (C-4 sterol decarboxylase) activity | 3-keto sterol reductase activity | aldo-keto reductase activity | isocitrate dehydrogenase activity | mevaldate reductase activity | gluconate dehydrogenase activity | steroid dehydrogenase activity | epoxide dehydrogenase activity | 5-exo-hydroxycamphor dehydrogenase activity | 2-hydroxytetrahydrofuran dehyd…	Aldo/keto reductase	1.1.1.-	With NAD(+) or NADP(+) as acceptor,		Bile acid biosynthesis	Lipid Metabolism	Aldo/keto reductase family proteins	General function prediction only
11030	1588131	NO	12.04	11.41	0.63	1	12.03	11.52	0.5	1	0	0	0	0	0	0
11029	1526800	YES	12.53	11.18	1.35	1	11.82	11.16	0.66	1	0	0	20	17	12	3	carbohydrate metabolic process | beta-N-acetylhexosaminidase activity | beta-N-acetylglucosaminidase activity	Glycoside hydrolase, catalytic core | Glycoside hydrolase, family 20 | Glycoside hydrolase, family 20, catalytic core | Beta-N-acetylhexosaminidase-like	3.2.1.52	Beta-N-acetylhexosaminidase,	Hydrolysis of terminal non-reducing N-acetyl-D-hexosamine residues in N-acetyl-beta-D-hexosaminides,	N-Glycan degradation	Metabolism of Complex Carbohydrates	Beta-N-acetylhexosaminidase	Carbohydrate transport and metabolism
11028	1500560	YES	11.56	11.03	0.53	1	12.58	11.44	1.13	1	0	0	0	0	0	0	ATP binding | nucleotide binding | translation | cytoplasm | aminoacyl-tRNA ligase activity | tRNA aminoacylation for protein translation	Aminoacyl-tRNA synthetase, class I, conserved site						Glycosylphosphatidylinositol-specific phospholipase C	Signal transduction mechanisms
11027	1481220	NO	12.45	11.27	1.17	1	12.09	11.29	0.8	1	0	0	0	0	0	0	nucleus | transcription factor activity | regulation of transcription, DNA-dependent | sequence-specific DNA binding | DNA-directed RNA polymerase activity | DNA-directed RNA polymerase I activity | DNA-directed RNA polymerase II activity | DNA-directed RNA polymerase III activity | RNA polymerase activity	Heat shock factor (HSF)-type, DNA-binding	2.7.7.6	DNA-directed RNA polymerase,	N nucleoside triphosphate = N diphosphate + {RNA}(N),	RNA polymerase	TRANSCRIPTION	Heat shock transcription factor	Transcription
11026	1455922	NO	12.17	11.66	0.52	1	11.98	11.98	0	1	0	0	0	0	0	0	iron ion binding | electron transport | oxidoreductase activity | electron carrier activity | FMN binding | NADPH-hemoprotein reductase activity	Oxidoreductase FAD/NAD(P)-binding | Flavoprotein pyridine nucleotide cytochrome reductase | Flavodoxin/nitric oxide synthase | Flavodoxin-like | FAD-binding, type 1	1.6.2.4	NADPH--ferrihemoprotein reductase,	NADPH + 2 ferricytochrome = NADP(+) + 2 ferrocytochrome,			NADP/FAD dependent oxidoreductase	Energy production and conversion
11025	1449568	YES	11.89	11.2	0.68	1	12.15	11.52	0.63	1	0	0	0	0	0	0	zinc ion binding | proteolysis | metalloendopeptidase activity | metallopeptidase activity | stromelysin 3 activity | collagenase activity | prenyl protein specific endopeptidase activity | matrilysin-2 activity	Peptidase M, neutral zinc metallopeptidases, zinc-binding site | Low density lipoprotein-receptor, class A, cysteine-rich | Blood coagulation inhibitor, Disintegrin | Peptidase M12B, ADAM/reprolysin	3.4.24.-	Metalloendopeptidases,				Meltrins, fertilins and related Zn-dependent metalloproteinases of the ADAMs family	Posttranslational modification, protein turnover, chaperones
11024	1446095	NO	11.67	11.54	0.13	1	12.17	11.86	0.31	1	0	0	0	0	0	0	proteolysis | pepsin A activity | aspartic-type endopeptidase activity	Peptidase A1 | Peptidase aspartic, active site | Peptidase aspartic, catalytic						Aspartyl protease	Posttranslational modification, protein turnover, chaperones
11023	1443394	NO	12.28	11.13	1.14	1	12.51	11.75	0.76	1	0	0	0	0	0	0		SNARE associated Golgi protein						Predicted membrane protein	Function unknown
11022	1443266	NO	11.95	11.73	0.22	1	11.8	11.42	0.38	1	0	0	0	0	6	0	metabolic process | oxidoreductase activity | aldehyde dehydrogenase (NAD) activity	Aldehyde dehydrogenase | Aldehyde/histidinol dehydrogenase | Aldehyde dehydrogenase, conserved site	1.2.1.3	Aldehyde dehydrogenase (NAD+),	An aldehyde + NAD(+) + H(2)O = an acid + NADH,	1,2-Dichloroethane degradation	Biodegradation of Xenobiotics	Aldehyde dehydrogenase	Energy production and conversion
11021	1438738	NO	12.22	11.44	0.78	1	11.99	11.63	0.36	1	0	0	0	0	0	0	proteolysis | cysteine-type endopeptidase activity | bleomycin hydrolase activity	Peptidase, cysteine peptidase active site | Peptidase C1B, bleomycin hydrolase	3.4.22.40	Bleomycin hydrolase,	Inactivates bleomycin B2 (a cytotoxic glycometallopeptide) by hydrolysis of a carboxyamide bond of b-aminoalanine, but also shows general aminopeptidase activity, The specificity varies somewhat with source, but amino acid arylamides of Met, Leu and Ala a			Bleomycin hydrolases and aminopeptidases of cysteine protease family	Amino acid transport and metabolism
11020	1438250	YES	11.97	11.05	0.92	1	12.23	11.18	1.06	1	0	0	0	0	0	0								beta-1,6-N-acetylglucosaminyltransferase, contains WSC domain | beta-1,6-N-acetylglucosaminyltransferase, contains WSC domain	Carbohydrate transport and metabolism
11019	1429028	NO	12.2	10.99	1.21	1	12.04	11.8	0.23	1	0	0	0	0	0	0	transport | membrane | ammonium transmembrane transporter activity	Rh-like protein/ammonium transporter | Ammonium transporter						Ammonia permease	Inorganic ion transport and metabolism
11018	1427361	NO	11.67	10.96	0.71	1	12.22	11.52	0.71	1	0	0	0	0	0	0	zinc ion binding | carbonate dehydratase activity | carbon utilization	Carbonic anhydrase	4.2.1.1	Carbonate dehydratase,	H(2)CO(3) = CO(2) + H(2)O,	Nitrogen metabolism	Energy Metabolism	Predicted carbonic anhydrase involved in protection against oxidative damage	Inorganic ion transport and metabolism
7861	1438201	NO	11.51	10.27	1.24	1	11.29	9.69	1.6	1	0	0	0	0	4	0	catalytic activity | epoxide hydrolase activity	Alpha/beta hydrolase fold-1 | Epoxide hydrolase-like						Soluble epoxide hydrolase	Lipid transport and metabolism
11016	1398063	NO	12.49	11.37	1.13	1	11.93	11.75	0.18	1	0	0	5	0	7	0	oxidoreductase activity | pyridoxine 4-dehydrogenase activity	Aldo/keto reductase	1.1.1.65	Pyridoxine 4-dehydrogenase,	Pyridoxine + NADP(+) = pyridoxal + NADPH,	Vitamin B6 metabolism	Metabolism of Cofactors and Vitamins	Voltage-gated shaker-like K+ channel, subunit beta/KCNAB	Energy production and conversion
11015	1447255	YES	11.83	10.75	1.08	1	11.96	14.49	-2.52	1	0	0	0	0	0	13		Ricin B lectin | Ricin B-related lectin
11014	1429886	NO	11.75	10.27	1.48	1	10.6	13.8	-3.2	0.103285	0	0	6	0	8	0		Dyp-type peroxidase
11013	1396202	NO	10.29	11.07	-0.79	1	11.3	13.47	-2.17	1	0	0	0	0	0	0
11012	617181	NO	12.62	11.9	0.72	1	12.29	13.1	-0.81	1	0	0	3	0	0	0	ATP binding | nucleotide binding | nucleoside-triphosphatase activity	AAA+ ATPase, core | AAA ATPase, core						AAA+-type ATPase	Posttranslational modification, protein turnover, chaperones
11011	518893	NO	12.51	12.87	-0.35	1	12.29	12.52	-0.23	1	0	0	3	0	3	0	catalytic activity | IMP dehydrogenase activity | GMP biosynthetic process	IMP dehydrogenase/GMP reductase | Cystathionine beta-synthase, core | IMP dehydrogenase | IMP dehydrogenase / GMP reductase, conserved site	1.1.1.205	IMP dehydrogenase,	Inosine 5'-phosphate + NAD(+) + H(2)O = xanthosine 5'-phosphate + NADH,	Purine metabolism	Nucleotide Metabolism	IMP dehydrogenase/GMP reductase	Nucleotide transport and metabolism
11010	497992	NO	12.21	12.69	-0.47	1	12.26	12.96	-0.7	1	0	0	0	0	0	0		Cyclin-like | Cyclin-related 2						Cyclin	General function prediction only
11009	1586555	NO	12.21	12.6	-0.38	1	12.6	12.79	-0.2	1	0	0	0	0	0	0
11008	1544147	NO	12.2	12.52	-0.32	1	12.76	12.5	0.26	1	0	0	0	0	0	0	protein modification process	Ubiquitin						Ubiquitin and ubiquitin-like proteins | Ubiquitin and ubiquitin-like proteins	General function prediction only
11007	1514407	YES	12.21	12.53	-0.32	1	12.29	12.3	-0.01	1	0	0	9	0	0	0								E3 ubiquitin-protein ligase/Putative upstream regulatory element binding protein | E3 ubiquitin-protein ligase/Putative upstream regulatory element binding protein	Posttranslational modification, protein turnover, chaperones
11006	1510645	NO	12.83	12.16	0.67	1	12.96	12.69	0.26	1	0	0	0	0	0	0
11772	1047198	NO	9.63	8.73	0.9	1	9.7	8.11	1.6	1	0	0	0	0	0	0	binding | catalytic activity | metabolic process | oxidoreductase activity | 2-deoxy-D-gluconate 3-dehydrogenase activity	NAD(P)-binding | Glucose/ribitol dehydrogenase | Short-chain dehydrogenase/reductase SDR	1.1.1.125	2-deoxy-D-gluconate 3-dehydrogenase,	2-deoxy-D-gluconate + NAD(+) = 3-dehydro-2-deoxy-D-gluconate + NADH,	Pentose and glucuronate interconversions	Carbohydrate Metabolism	Mitochondrial/plastidial beta-ketoacyl-ACP reductase	Lipid transport and metabolism
11004	1504313	NO	12.37	12.92	-0.55	1	12.35	12.5	-0.15	1	0	0	0	0	2	0		HSP20-like chaperone | CS domain | CS						HSP90 co-chaperone p23	Posttranslational modification, protein turnover, chaperones
11003	1502629	YES	12.62	12.64	-0.02	1	12.82	12.66	0.16	1	0	0	0	4	0	0		Barwin-related endoglucanase | Beta-lactamase-type transpeptidase fold | Rare lipoprotein A						von Willebrand factor and related coagulation proteins | von Willebrand factor and related coagulation proteins	Extracellular structures
11002	1502390	NO	12.26	12.63	-0.36	1	12.72	12.38	0.34	1	0	0	2	0	2	0	binding | transport | membrane | mitochondrion | mitochondrial transport	Mitochondrial substrate carrier | Mitochondrial brown fat uncoupling protein						Mitochondrial oxoglutarate/malate carrier proteins	Energy production and conversion
11001	1500390	NO	12.99	12.34	0.65	1	11.93	13.28	-1.34	1	0	0	10	0	0	0	zinc ion binding | proteolysis | metallopeptidase activity | calcium ion binding	Peptidase M, neutral zinc metallopeptidases, zinc-binding site | Calcium-binding EF-hand						Predicted mutarotase	Carbohydrate transport and metabolism
11000	1483508	NO	12.65	13	-0.35	1	12.26	12.76	-0.5	1	0	0	8	0	16	0	binding | catalytic activity | metabolic process | cytoplasm | cellular carbohydrate metabolic process | transferase activity, transferring acyl groups, acyl groups converted into alkyl on transfer | ATP citrate synthase activity | succinate-CoA ligase (ADP-forming) activity	NAD(P)-binding | Citrate synthase-like, core | Succinyl-CoA ligase, alpha subunit | ATP-citrate lyase/succinyl-CoA ligase | CoA-binding | ATP-citrate lyase/succinyl-CoA ligase, active site | Succinyl-CoA synthetase-like | ATP-citrate synthase						ATP-citrate lyase	Energy production and conversion
10999	1482161	NO	12.32	12.9	-0.58	1	12.56	12.6	-0.04	1	0	0	0	0	4	0	intracellular | actin binding	Actin-binding, cofilin/tropomyosin type						Actin depolymerizing factor	Cytoskeleton
10998	1480848	NO	12.86	12.79	0.07	1	12.87	12.57	0.3	1	0	0	0	0	0	0	protein folding | peptidyl-prolyl cis-trans isomerase activity | cyclophilin | FK506-sensitive peptidyl-prolyl cis-trans isomerase | cyclophilin-type peptidyl-prolyl cis-trans isomerase activity	Peptidyl-prolyl cis-trans isomerase, FKBP-type	5.2.1.8	Peptidylprolyl isomerase,	Peptidylproline (omega=180) = peptidylproline (omega=0),			FKBP-type peptidyl-prolyl cis-trans isomerase	Posttranslational modification, protein turnover, chaperones
10997	1479423	YES	12.11	12.17	-0.05	1	12.43	12.59	-0.16	1	0	0	0	0	0	0
10996	1475337	NO	12.58	12.53	0.05	1	12.87	12.71	0.17	1	0	0	0	0	0	0	proteolysis | pepsin A activity | aspartic-type endopeptidase activity	Peptidase A1 | Peptidase aspartic, active site | Peptidase aspartic, catalytic	3.4.23.18	Aspergillopepsin I,	Hydrolysis of proteins with broad specificity, Generally favors hydrophobic residues in P1 and P1', but also accepts Lys in P1, which leads to activation of trypsinogen, Does not clot milk,			Aspartyl protease	Posttranslational modification, protein turnover, chaperones
10995	1475204	NO	12.17	12.61	-0.44	1	12.51	12.35	0.15	1	0	0	3	0	4	0	actin cytoskeleton | actin binding | cytoskeleton organization and biogenesis | actin cytoskeleton organization and biogenesis	Profilin/allergen | Profilin, plant						Profilin	Cytoskeleton
10994	1474704	NO	12	12.49	-0.49	1	12.36	12.63	-0.27	1	0	0	3	0	5	0	intracellular | GTP binding | small GTPase MEANted signal transduction | protein transport	Ras GTPase | Ras | Ras small GTPase, Ras type | Ras small GTPase, Rho type | Ras small GTPase, Rab type | Small GTP-binding protein						Ras-related small GTPase, Rho type	General function prediction only
10993	1466720	NO	12.24	12.58	-0.34	1	12.24	12.29	-0.05	1	0	0	0	0	12	0	binding | hydrolase activity | ATP binding | proteolysis | ATP-dependent helicase activity | ATP-dependent DNA helicase activity | ATP-dependent RNA helicase activity | DNA-dependent ATPase activity | RNA-dependent ATPase activity | protein-transmembrane transporting ATPase activity | ATPase activity | single-stranded DNA-dependent ATP-dependent DNA helicase activity | ATPase activity, coupled | …	AAA+ ATPase, core | AAA ATPase, core | TonB box, conserved site | AAA ATPase, conserved site | Peptidase S16, Lon protease | Aspartate decarboxylase-like fold | Vps4 oligomerisation, C-terminal | AAA ATPase VAT, N-terminal | AAA ATPase, CDC48	3.6.1.3	Adenosinetriphosphatase,	ATP + H(2)O = ADP + phosphate,	Purine metabolism	Nucleotide Metabolism	AAA+-type ATPase	Posttranslational modification, protein turnover, chaperones
10992	1456826	NO	12.17	12.02	0.15	1	12.73	12.54	0.19	1	0	0	0	0	0	0
10991	1453924	NO	12.95	12.48	0.48	1	12.34	12.34	0	1	0	0	5	0	12	0	protein folding | unfolded protein binding | calcium ion binding | endoplasmic reticulum	Concanavalin A-like lectin/glucanase | Calreticulin/calnexin | Calreticulin/calnexin, P						Calnexin	Posttranslational modification, protein turnover, chaperones
10990	1447429	NO	13	12.11	0.89	1	12.34	12.78	-0.44	1	0	0	0	0	0	0	proteolysis | caspase activity	Peptidase C14, caspase catalytic						Metacaspase involved in regulation of apoptosis | Metacaspase involved in regulation of apoptosis	Cell cycle control, cell division, chromosome partitioning
8310	1386719	NO	7.28	6.15	1.13	1	7.21	5.7	1.52	1	0	0	4	0	0	0	catalytic activity | lipid metabolic process | triacylglycerol lipase activity | phospholipase activity | lipase activity | 1-oxa-2-oxocycloheptane lactonase activity | sulfolactone hydrolase activity | 3,4-dihydrocoumarin hydrolase activity | butyrolactone hydrolase activity	Lipase, class 3 | Lipase, active site	3.1.1.-	Carboxylic ester hydrolases,		2,4-Dichlorobenzoate degradation	Biodegradation of Xenobiotics	Predicted lipase	Lipid transport and metabolism
10988	1445000	NO	11.88	12.8	-0.92	1	12.45	12.63	-0.18	1	0	0	2	0	2	0	extracellular region | hydrolase activity, hydrolyzing O-glycosyl compounds | carbohydrate metabolic process | carbohydrate binding	Carbohydrate-binding family V/XII
10781	1437945	NO	8.95	8.79	0.16	1	9.93	8.43	1.5	1	0	0	0	0	2	0	transport | steroid binding	Transthyretin | Hydroxyisourate hydrolase						Transthyretin and related proteins	Lipid transport and metabolism
10986	1442112	NO	12.35	12.38	-0.04	1	12.29	12.71	-0.43	1	0	0	0	0	0	0	catalytic activity | iron ion binding | metabolic process | electron transport | heme binding | oxidoreductase activity | iron-sulfur cluster binding | electron carrier activity | FMN binding | amino acid biosynthetic process | NADP binding | 4 iron, 4 sulfur cluster binding | sulfite reductase (NADPH) activity | sulfite reductase complex (NADPH) | pyruvate dehydrogenase (NADP+) activity	Transketolase, C-terminal/Pyruvate-ferredoxin oxidoreductase, domain II | Flavodoxin/nitric oxide synthase | Flavodoxin-like | Nitrite and sulphite reductase iron-sulphur/siroheme-binding site | Nitrite and sulphite reductase 4Fe-4S region | Nitrite/sulphite reductase, hemoprotein beta-component, ferrodoxin-like | Sulphite reductase (NADPH) hemoprotein, beta subunit	1.2.1.51	Pyruvate dehydrogenase (NADP+),	Pyruvate + CoA + NADP(+) = acetyl-CoA + CO(2) + NADPH,	Pyruvate metabolism	Carbohydrate Metabolism	Sulfite reductase (ferredoxin)	Inorganic ion transport and metabolism
10985	1441442	NO	12.35	13.01	-0.66	1	12.53	12.79	-0.27	1	0	0	0	0	0	0	transport | membrane | integral to membrane | amino acid transport | amino acid transmembrane transporter activity	Amino acid permease-associated region | Amino acid/polyamine transporter I | Amino acid permease, conserved site						Amino acid transporters	Amino acid transport and metabolism
10984	1439750	NO	12.59	12.31	0.29	1	12.4	12.67	-0.28	1	0	0	0	0	0	0	membrane | 1,3-beta-glucan synthase complex | 1,3-beta-glucan synthase activity | 1,3-beta-glucan biosynthetic process	Glycosyl transferase, family 48	2.4.1.34	1,3-beta-glucan synthase,	UDP-glucose + {(1,3)-beta-D-glucosyl}(N) = UDP + {(1,3)-beta-D- glucosyl}(N+1),	Starch and sucrose metabolism	Metabolism of Complex Carbohydrates	1,3-beta-glucan synthase/callose synthase catalytic subunit	Cell wall/membrane/envelope biogenesis
10983	1439665	YES	12.17	12.72	-0.56	1	12.5	12.32	0.19	1	0	0	0	0	0	0		WD40 repeat | WD40 repeat-like						Actin-related protein Arp2/3 complex, subunit ARPC1/p41-ARC	Cytoskeleton
10982	1438792	NO	12.62	12.14	0.48	1	12.84	12.77	0.07	1	0	0	0	0	0	0	transferase activity, transferring hexosyl groups | heme binding | transition metal ion binding | chitin synthase activity	Cytochrome b5 | Fungal chitin synthase	2.4.1.16	Chitin synthase,	UDP-N-acetyl-D-glucosamine + {(1,4)-(N-acetyl-beta-D-glucosaminyl)}(N) = UDP + {(1,4)-(N-acetyl-beta-D-glucosaminyl)}(N+1),	Aminosugars metabolism	Metabolism of Complex Carbohydrates	Chitin synthase/hyaluronan synthase (glycosyltransferases)	Cell wall/membrane/envelope biogenesis
10981	1438761	NO	12.09	12.42	-0.33	1	12.34	12.59	-0.25	1	0	0	0	0	0	0	intracellular | GTP binding | small GTPase MEANted signal transduction | intracellular protein transport	Ras GTPase | Small GTP-binding protein | ARF/SAR superfamily | ADP-ribosylation factor | GTP-binding protein SAR1						GTP-binding ADP-ribosylation factor Arf6 (dArf3)	Intracellular trafficking, secretion, and vesicular transport
10980	1438518	NO	12.1	12.53	-0.43	1	12.58	12.52	0.05	1	0	0	5	0	9	0	metabolic process | nucleotidyltransferase activity | UTP:glucose-1-phosphate uridylyltransferase activity	UTP--glucose-1-phosphate uridylyltransferase | UTP--glucose-1-phosphate uridylyltransferase, subgroup	2.7.7.9	UTP--glucose-1-phosphate uridylyltransferase,	UTP + alpha-D-glucose 1-phosphate = diphosphate + UDP-glucose,	Pentose and glucuronate interconversions	Carbohydrate Metabolism	UDP-glucose pyrophosphorylase	Carbohydrate transport and metabolism
10979	1438136	YES	12.21	12.34	-0.14	1	12.32	12.51	-0.19	1	0	0	0	0	0	0								beta-1,6-N-acetylglucosaminyltransferase, contains WSC domain | beta-1,6-N-acetylglucosaminyltransferase, contains WSC domain	Carbohydrate transport and metabolism
10978	1437845	NO	12.19	12.22	-0.02	1	12.04	12.76	-0.72	1	0	0	0	0	0	0	zinc ion binding | glucan 1,4-alpha-glucosidase activity	Zinc finger, ZZ-type	3.2.1.3	Glucan 1,4-alpha-glucosidase,	Hydrolysis of terminal 1,4-linked alpha-D-glucose residues successively from non-reducing ends of the chains with release of beta-D-glucose,	Starch and sucrose metabolism	Metabolism of Complex Carbohydrates	Serine/threonine protein kinase	Signal transduction mechanisms
10977	1437737	NO	12.69	12.51	0.18	1	12.96	12.72	0.25	1	0	0	0	0	0	0	chitin synthase activity | chitin biosynthetic process	Chitin synthase | Chitin synthase N-terminal	2.4.1.16	Chitin synthase,	UDP-N-acetyl-D-glucosamine + {(1,4)-(N-acetyl-beta-D-glucosaminyl)}(N) = UDP + {(1,4)-(N-acetyl-beta-D-glucosaminyl)}(N+1),	Aminosugars metabolism	Metabolism of Complex Carbohydrates	Chitin synthase/hyaluronan synthase (glycosyltransferases)	Cell wall/membrane/envelope biogenesis
10976	1437651	NO	12.22	12.65	-0.43	1	12.16	12.42	-0.26	1	0	0	0	0	0	0		WD40 repeat | WD40 repeat-like | G-protein, beta subunit | Guanine nucleotide-binding protein, beta subunit						G-protein beta subunit	General function prediction only
10975	1429099	NO	12.42	12.98	-0.56	1	12.7	12.86	-0.17	1	0	0	0	0	0	0
10974	1420230	YES	12.39	12.7	-0.31	1	12.83	12.57	0.26	1	6	0	10	0	21	17	proteolysis | pepsin A activity | aspartic-type endopeptidase activity | saccharopepsin activity	Peptidase A1 | Peptidase aspartic, active site | Peptidase aspartic, catalytic	3.4.23.25	Saccharopepsin,	Hydrolysis of proteins with broad specificity for peptide bonds, Cleaves -Leu-Leu-|-Val-Tyr- bond in a synthetic substrate, Does not act on esters of Tyr or Arg,			Aspartyl protease	Posttranslational modification, protein turnover, chaperones
10973	1412277	NO	12.64	12.47	0.17	1	12.8	12.51	0.29	1	0	0	2	0	2	0	heme binding | transition metal ion binding | nitrate reductase (NADH) activity	Cytochrome b5						Cytochrome b5	Energy production and conversion
10972	1405416	NO	12.5	12.28	0.22	1	12.58	12.42	0.17	1	0	0	2	0	5	0	oxidoreductase activity | antioxidant activity	Thioredoxin-like fold | Alkyl hydroperoxide reductase/ Thiol specific antioxidant/ Mal allergen						Alkyl hydroperoxide reductase, thiol specific antioxidant and related enzymes	Posttranslational modification, protein turnover, chaperones
10971	1403969	NO	12.21	12.68	-0.47	1	12.51	12.68	-0.17	1	0	0	0	0	0	0	protein modification process	Ubiquitin						Ubiquitin and ubiquitin-like proteins | Ubiquitin and ubiquitin-like proteins	General function prediction only
6094	651575	NO	6.21	5.27	0.94	1	6.24	4.92	1.32	1	0	0	0	0	0	0	catalytic activity | metabolic process | C-4 methylsterol oxidase activity	Sterol desaturase						C-4 sterol methyl oxidase	Lipid transport and metabolism
10969	1389932	NO	12.43	12.87	-0.44	1	12.62	12.98	-0.36	1	0	0	0	0	4	0	protein binding | GTP binding | cell cycle | septin complex	Cell division/GTP binding protein | Septin						Septin family protein (P-loop GTPase) | Septin family protein (P-loop GTPase) | Septin family protein (P-loop GTPase)	Cell cycle control, cell division, chromosome partitioning
10968	1388033	NO	12.54	12.46	0.08	1	12.22	12.37	-0.15	1	0	0	0	0	0	0
10967	912384	NO	12.17	12.62	-0.45	1	12.29	11.86	0.44	1	0	0	0	0	3	0	oxidoreductase activity | C-3 sterol dehydrogenase (C-4 sterol decarboxylase) activity | 3-keto sterol reductase activity | aldo-keto reductase activity | isocitrate dehydrogenase activity | mevaldate reductase activity | gluconate dehydrogenase activity | steroid dehydrogenase activity | epoxide dehydrogenase activity | 5-exo-hydroxycamphor dehydrogenase activity | 2-hydroxytetrahydrofuran dehyd…	Aldo/keto reductase	1.1.1.-	With NAD(+) or NADP(+) as acceptor,		Bile acid biosynthesis	Lipid Metabolism	Aldo/keto reductase family proteins	General function prediction only
10966	300626	NO	12.36	12.94	-0.59	1	12.29	12.27	0.02	1	0	0	0	0	0	0	intracellular | structural constituent of ribosome | ribosome | translation	Ribosomal protein S30						Ubiquitin-like/40S ribosomal S30 protein fusion | Ubiquitin-like/40S ribosomal S30 protein fusion	Posttranslational modification, protein turnover, chaperones
10965	1591791	NO	12.12	13.15	-1.03	1	12.14	12.04	0.1	1	0	0	0	0	2	0	intracellular | structural constituent of ribosome | ribosome | translation	Translation protein SH3-like | Ribosomal protein L21e						60S ribosomal protein L21	Translation, ribosomal structure and biogenesis
10964	1589207	NO	12.13	13.21	-1.08	1	12.23	12.19	0.03	1	0	0	0	0	5	0	intracellular | structural constituent of ribosome | ribosome | translation	Nucleic acid-binding, OB-fold-like | Ribosomal protein S17						40S ribosomal protein S11	Translation, ribosomal structure and biogenesis
10963	1511997	NO	11.85	12.82	-0.97	1	12.19	12.25	-0.06	1	0	0	0	0	0	0		Sulphate-modifying factor-like | SAM-dependent methyltransferase, EsaF-type, putative
10962	1501736	NO	11.91	13.36	-1.45	1	11.65	12.35	-0.7	1	0	0	21	0	27	0	catalytic activity | transaminase activity | pyridoxal phosphate binding | biosynthetic process | transferase activity, transferring nitrogenous groups | aspartate transaminase activity | amino acid metabolic process	Pyridoxal phosphate-dependent transferase, major region | Aminotransferase, class I and II | Aminotransferases, class-I, pyridoxal-phosphate-binding site | Aspartate/other aminotransferase	2.6.1.1	Aspartate aminotransferase,	L-aspartate + 2-oxoglutarate = oxaloacetate + L-glutamate,	Alanine and aspartate metabolism	Amino Acid Metabolism	Aspartate aminotransferase/Glutamic oxaloacetic transaminase AAT2/GOT1	Amino acid transport and metabolism
10961	1495497	NO	12.44	12.63	-0.19	1	12.12	12.03	0.09	1	0	0	2	0	6	0	catalytic activity | metabolic process | transketolase activity	Transketolase, central region | Transketolase, C-terminal | Transketolase, C-terminal/Pyruvate-ferredoxin oxidoreductase, domain II | Transketolase, N-terminal | Bacterial transketolase	2.2.1.1	Transketolase,	Sedoheptulose 7-phosphate + D-glyceraldehyde 3-phosphate = D-ribose 5-phosphate + D-xylulose 5-phosphate,	Pentose phosphate pathway	Carbohydrate Metabolism	Transketolase	Carbohydrate transport and metabolism
3966	1485580	NO	7.77	7.05	0.72	1	8.06	6.78	1.28	1	0	0	0	0	0	0	membrane | iron ion binding | lipid metabolic process | heme binding | oxidoreductase activity | transition metal ion binding | stearoyl-CoA 9-desaturase activity | endoplasmic reticulum | fatty acid biosynthetic process | oxidoreductase activity, acting on paired donors, with oxidation of a pair of donors resulting in the reduction of molecular oxygen to two molecules of water	Cytochrome b5 | Fatty acid desaturase, type 1, N-terminal | Fatty acid desaturase, type 1, C-terminal | Fatty acid desaturase, type 1, core | Fatty acid desaturase, type 1						Fatty acid desaturase	Lipid transport and metabolism
10959	1490182	NO	12.08	12.96	-0.88	1	12.14	11.85	0.29	1	0	0	2	0	4	0	intracellular | structural constituent of ribosome | ribosome | translation	Ribosomal protein S26e						40s ribosomal protein S26	Translation, ribosomal structure and biogenesis
10958	1489351	NO	12.29	13.05	-0.76	1	12.34	12.06	0.28	1	0	0	8	0	11	0	intracellular | structural constituent of ribosome | ribosome | translation	Ribosomal protein L18ae						60S ribosomal protein L18A	Translation, ribosomal structure and biogenesis
10957	1488966	NO	12.23	13.25	-1.02	1	12.29	12.17	0.12	1	0	0	4	0	6	0	intracellular | structural constituent of ribosome | ribosome | translation	Ribosomal protein L6E						60s ribosomal protein L6	Translation, ribosomal structure and biogenesis
6808	1450067	NO	10.04	10.68	-0.64	1	10.21	8.94	1.26	1	0	0	0	0	0	0	catalytic activity | metabolic process | 4-coumarate-CoA ligase activity	AMP-dependent synthetase and ligase	6.2.1.12	4-coumarate--CoA ligase,	ATP + 4-coumarate + CoA = AMP + diphosphate + 4-coumaroyl-CoA,	Flavonoids, stilbene and lignin biosynthesis	Biosynthesis of Secondary Metabolites	Acyl-CoA synthetase	Lipid transport and metabolism
10955	1488230	NO	11.48	13.28	-1.79	1	12.18	12.53	-0.35	1	0	0	10	0	17	0	carbohydrate metabolic process | intramolecular transferase activity, phosphotransferases | phosphoglucomutase activity	Alpha-D-phosphohexomutase, C-terminal | Alpha-D-phosphohexomutase, alpha/beta/alpha domain I | Alpha-D-phosphohexomutase, alpha/beta/alpha domain II | Alpha-D-phosphohexomutase, conserved site | Alpha-D-phosphohexomutase, alpha/beta/alpha I, II and III | Alpha-D-phosphohexomutase, alpha/beta/alpha domain III | Alpha-D-phosphohexomutase, N-terminal	5.4.2.2	Phosphoglucomutase,	Alpha-D-glucose 1-phosphate = alpha-D-glucose 6-phosphate,	Streptomycin biosynthesis	Biosynthesis of Secondary Metabolites	Phosphoglucomutase	Carbohydrate transport and metabolism
10954	1484518	YES	12.02	12.72	-0.7	1	11.9	11.99	-0.09	1	0	0	0	2	0	0		TonB box, conserved site
10953	1483800	NO	11.96	12.72	-0.75	1	12.05	12.55	-0.49	1	0	0	3	0	4	0	protein binding | GTP binding | cell cycle | septin complex	Cell division/GTP binding protein | Septin						Septin family protein (P-loop GTPase) | Septin family protein (P-loop GTPase) | Septin family protein (P-loop GTPase)	Cell cycle control, cell division, chromosome partitioning
10952	1479417	NO	12.4	13.18	-0.78	1	12.38	12.09	0.29	1	0	0	8	0	11	0	intracellular | RNA binding | structural constituent of ribosome | ribosome | translation | small ribosomal subunit	Ribosomal protein S5, N-terminal | Ribosomal protein S5, C-terminal | Ribosomal protein S5, eukaryotic/archaeal						40S ribosomal protein S2/30S ribosomal protein S5	Translation, ribosomal structure and biogenesis
10951	1467785	NO	12.03	13.04	-1.01	1	12.11	12.13	-0.01	1	0	0	0	0	4	0	intracellular | structural constituent of ribosome | ribosome | translation	Ribosomal protein L5						60S ribosomal protein L11	Translation, ribosomal structure and biogenesis
10950	1460275	NO	12.34	13.2	-0.86	1	12.46	12.03	0.43	1	0	0	3	0	5	0	intracellular	Ribosomal protein S8e						40S ribosomal protein S8	Translation, ribosomal structure and biogenesis
10949	1457813	NO	12.29	13.09	-0.8	1	12.46	11.89	0.57	1	0	0	2	0	3	0	intracellular | RNA binding | structural constituent of ribosome | ribosome | translation	Ribosomal protein L25/L23 | Ribosomal protein L23/L15e, core | Ribosomal protein L23/L25, N-terminal | Ribosomal protein L23, conserved site						60s ribosomal protein L23	Translation, ribosomal structure and biogenesis
10948	1455789	NO	12.13	13.08	-0.95	1	12.14	12.01	0.13	1	0	0	6	0	8	0	intracellular | structural constituent of ribosome | ribosome | translation	Ribosomal protein L23/L15e, core | Ribosomal protein L15e						60s ribosomal protein L15	Translation, ribosomal structure and biogenesis
10947	1451851	NO	12.05	12.9	-0.85	1	11.99	11.64	0.35	1	0	0	6	0	9	0	intracellular | RNA binding | structural constituent of ribosome | translation | rRNA binding | small ribosomal subunit	RNA-binding S4 | Ribosomal protein S4 | Ribosomal protein S4/S9, eukaryotic/archaeal						Ribosomal protein S4	Translation, ribosomal structure and biogenesis
10946	1450980	NO	12.2	13.23	-1.03	1	12.07	12.09	-0.02	1	0	0	4	0	7	0	intracellular | structural constituent of ribosome | ribosome | translation | 5S rRNA binding	Ribosomal protein L18/L5 | Ribosomal protein L5, eukaryotic						60S ribosomal protein L5	Translation, ribosomal structure and biogenesis
10945	1448101	NO	12.05	13.12	-1.06	1	12.03	11.9	0.13	1	0	0	3	0	7	0	intracellular | structural constituent of ribosome | ribosome | translation	Ribosomal protein L15						60s ribosomal protein L15/L27	Translation, ribosomal structure and biogenesis
10944	1446782	NO	11.87	12.81	-0.95	1	11.65	12.28	-0.62	1	0	0	0	0	0	0	protein folding | unfolded protein binding | heat shock protein binding	Heat shock protein DnaJ | Heat shock protein DnaJ, N-terminal | Heat shock protein DnaJ, cysteine-rich region | Chaperone DnaJ, C-terminal | HSP40/DnaJ peptide-binding						Molecular chaperone (DnaJ superfamily)	Posttranslational modification, protein turnover, chaperones
10943	1446569	NO	12.02	13.04	-1.01	1	12	11.86	0.13	1	0	0	6	0	11	0	intracellular | structural constituent of ribosome | ribosome | translation	Ribosomal protein S9						40S ribosomal protein S16	Translation, ribosomal structure and biogenesis
10942	1446134	NO	12.28	13.31	-1.03	1	12.11	12.13	-0.02	1	0	0	2	0	10	0	intracellular | structural constituent of ribosome | ribosome | translation	Ribosomal protein S6e | Ribosomal protein S6, eukaryotic						40S ribosomal protein S6	Translation, ribosomal structure and biogenesis
10941	1444719	NO	11.96	12.87	-0.91	1	11.9	11.95	-0.05	1	0	0	5	0	6	0	intracellular | structural constituent of ribosome | ribosome | translation	Ribosomal protein L27e						60S ribosomal protein L27	Translation, ribosomal structure and biogenesis
10940	1444080	NO	11.97	13.02	-1.05	1	11.92	11.86	0.07	1	0	0	5	0	5	0	intracellular | structural constituent of ribosome | ribosome | translation	Ribosomal protein L14b/L23e						60S ribosomal protein L14/L17/L23	Translation, ribosomal structure and biogenesis
10939	1441714	NO	12.09	12.94	-0.85	1	12.32	11.9	0.42	1	0	0	0	0	8	0	intracellular | structural constituent of ribosome | ribosome | translation | small ribosomal subunit	Ribosomal protein S19/S15 | Ribosomal protein S15, eukaryotic/archaeal						40S ribosomal protein S15	Translation, ribosomal structure and biogenesis
10938	1441304	NO	12.07	12.89	-0.83	1	12.08	11.77	0.31	1	0	0	2	0	4	0	intracellular | structural constituent of ribosome | ribosome | translation | large ribosomal subunit	Ribosomal protein L13 | Ribosomal protein L13, eukaryotic/archaeal						60S ribosomal protein L13a	Translation, ribosomal structure and biogenesis
10937	1440776	NO	12.07	12.96	-0.89	1	12.05	11.74	0.31	1	2	0	7	0	9	0	intracellular | structural constituent of ribosome | ribosome | translation	Ribosomal protein L18e						60s ribosomal protein L18	Translation, ribosomal structure and biogenesis
10936	1438498	NO	12.26	13.28	-1.02	1	12.24	12.15	0.09	1	0	0	10	0	17	0	intracellular | structural constituent of ribosome | ribosome | translation | small ribosomal subunit	Ribosomal protein S7 | Ribosomal protein S7, eukaryotic/archaeal						Ribosomal protein S7	Translation, ribosomal structure and biogenesis
10935	1419115	NO	12.11	13.13	-1.02	1	11.6	12.54	-0.93	1	0	4	2	0	11	0	ATP binding	Heat shock protein 70 | Heat shock protein Hsp70						Molecular chaperones HSP105/HSP110/SSE1, HSP70 superfamily	Posttranslational modification, protein turnover, chaperones
10934	1386576	NO	12.24	13.06	-0.81	1	12.24	11.98	0.25	1	0	0	6	0	8	0	intracellular | structural constituent of ribosome | ribosome | translation | small ribosomal subunit	Ribosomal protein S2 | Ribosomal protein S2, eukaryotic/archaeal						40S ribosomal protein SA (P40)/Laminin receptor 1	Translation, ribosomal structure and biogenesis
10933	1386340	NO	12.04	12.76	-0.72	1	12.09	12.57	-0.48	1	0	0	0	0	2	0	ATP binding | nucleic acid binding | ATP-dependent helicase activity | ATP-dependent DNA helicase activity | ATP-dependent RNA helicase activity | DNA-dependent ATPase activity | RNA-dependent ATPase activity | protein-transmembrane transporting ATPase activity | ATPase activity | single-stranded DNA-dependent ATP-dependent DNA helicase activity | ATPase activity, coupled | ATPase activity, uncou…	DEAD-like helicase, N-terminal | Helicase, superfamily 1 and 2, ATP-binding | DNA/RNA helicase, DEAD/DEAH box type, N-terminal | DNA/RNA helicase, C-terminal | RNA helicase, DEAD-box type, Q motif	3.6.1.3	Adenosinetriphosphatase,	ATP + H(2)O = ADP + phosphate,	Purine metabolism	Nucleotide Metabolism	ATP-dependent RNA helicase	RNA processing and modification
10932	1385359	NO	12.45	12.97	-0.52	1	12.53	11.89	0.64	1	0	0	3	0	6	0	intracellular | structural constituent of ribosome | ribosome | translation	Nucleic acid-binding, OB-fold-like | Translation protein SH3-like | Ribosomal protein L2						Structural maintenance of chromosome protein 2 (chromosome condensation complex Condensin, subunit E) | Structural maintenance of chromosome protein 2 (chromosome condensation complex Condensin, subunit E)	Chromatin structure and dynamics
10931	1385263	YES	11.7	13.09	-1.39	1	12.25	12.61	-0.36	1	0	0	0	0	5	0		Protein of unknown function DUF1960
10930	1372070	NO	12.02	13.03	-1.01	1	12.03	12.07	-0.05	1	0	0	0	0	0	0	protein modification process	Ubiquitin						Ubiquitin/60s ribosomal protein L40 fusion	Translation, ribosomal structure and biogenesis
10929	843409	NO	11.38	12.92	-1.54	1	11.98	13.15	-1.17	1	0	0	0	0	0	0
10928	686771	NO	12.08	12.91	-0.83	1	12.71	13.28	-0.58	1	0	0	0	0	0	0	binding | catalytic activity | metabolic process | cellular metabolic process | coenzyme binding	NAD(P)-binding | NAD-dependent epimerase/dehydratase						Flavonol reductase/cinnamoyl-CoA reductase	Defense mechanisms
10927	439991	NO	11.52	13.15	-1.63	1	12.47	13.23	-0.76	1	0	0	0	0	0	0		MSF1						Protein similar to predicted member of the intramitochondrial sorting protein family	Intracellular trafficking, secretion, and vesicular transport
10926	1514005	YES	12.26	13.24	-0.98	1	12.08	12.94	-0.86	1	0	0	0	0	0	0								Nuclear receptor coregulator SMRT/SMRTER, contains Myb-like domains	Transcription
10925	1503763	NO	11.76	12.8	-1.04	1	12.31	13.15	-0.84	1	0	0	0	0	0	0
10924	1501306	YES	12.18	13.39	-1.21	1	12.42	13.31	-0.88	1	0	0	0	0	0	0								Chitinase	Cell wall/membrane/envelope biogenesis
10923	1479769	YES	12.2	12.68	-0.48	1	11.94	13.62	-1.68	1	0	0	4	0	0	0	glucan 1,3-beta-glucosidase activity	Glycoside hydrolase, catalytic core	3.2.1.58	Glucan 1,3-beta-glucosidase,	Successive hydrolysis of beta-D-glucose units from the non-reducing ends of 1,3-beta-D-glucans, releasing alpha-glucose,	Starch and sucrose metabolism	Metabolism of Complex Carbohydrates
10922	1461671	NO	12.43	13.19	-0.76	1	11.82	12.71	-0.89	1	3	0	21	0	28	0	protein binding | ATP binding | cellular protein metabolic process | protein folding | unfolded protein binding | chaperonin ATPase activity | chaperonin ATPase complex	Chaperonin Cpn60/TCP-1 | Chaperonin Cpn60 | GroEL-like chaperone, ATPase | Chaperonin GroEL	3.6.4.9	Chaperonin ATPase,	ATP + H(2)O = ADP + phosphate,			Mitochondrial chaperonin, Cpn60/Hsp60p	Posttranslational modification, protein turnover, chaperones
10921	1457548	YES	12.03	13.1	-1.07	1	12.38	12.76	-0.39	1	0	0	0	0	0	0	binding | catalytic activity | metabolic process | glyceraldehyde-3-phosphate dehydrogenase (phosphorylating) activity | glycolysis | NAD binding | glucose metabolic process | glyceraldehyde-3-phosphate dehydrogenase activity	NAD(P)-binding | Glyceraldehyde 3-phosphate dehydrogenase | Glyceraldehyde-3-phosphate dehydrogenase, type I	1.2.1.12	Glyceraldehyde 3-phosphate dehydrogenase (phosphorylating),	D-glyceraldehyde 3-phosphate + phosphate + NAD(+) = 3-phospho-D- glyceroyl phosphate + NADH,	Glycolysis / Gluconeogenesis	Carbohydrate Metabolism	Glyceraldehyde 3-phosphate dehydrogenase	Carbohydrate transport and metabolism
10920	1454869	NO	12.45	13.23	-0.78	1	12.05	12.95	-0.89	1	0	0	14	0	9	0	proton-transporting two-sector ATPase complex | hydrogen ion transporting ATPase activity, rotational mechanism | hydrogen ion transmembrane transporter activity | ATP synthesis coupled proton transport | hydrogen ion transporting ATP synthase activity, rotational mechanism | hydrogen-transporting two-sector ATPase activity | proton-transporting ATP synthase complex | hydrolase activity, acting o…	ATPase, F1/V1/A1 complex, alpha/beta subunit, nucleotide-binding | ATPase, F1/V1/A1 complex, alpha/beta subunit, C-terminal | ATPase, F1/V1/A1 complex, alpha/beta subunit, N-terminal | ATPase, F1 complex, alpha subunit	3.6.3.14	H(+)-transporting two-sector ATPase,	ATP + H(2)O + H(+)(In) = ADP + phosphate + H(+)(Out),	ATP synthesis	Energy Metabolism	F0F1-type ATP synthase, alpha subunit	Energy production and conversion
10919	1447114	NO	12.22	12.72	-0.5	1	12.31	13.09	-0.78	1	0	0	0	0	0	0	chitin synthase activity | chitin biosynthetic process	Chitin synthase | Chitin synthase N-terminal	2.4.1.16	Chitin synthase,	UDP-N-acetyl-D-glucosamine + {(1,4)-(N-acetyl-beta-D-glucosaminyl)}(N) = UDP + {(1,4)-(N-acetyl-beta-D-glucosaminyl)}(N+1),	Aminosugars metabolism	Metabolism of Complex Carbohydrates	Chitin synthase/hyaluronan synthase (glycosyltransferases)	Cell wall/membrane/envelope biogenesis
10918	1446797	NO	12.27	13.67	-1.41	1	12.42	13.67	-1.26	1	0	0	0	0	15	0	glycolysis | phosphoglycerate kinase activity	Phosphoglycerate kinase | Phosphoglycerate kinase, conserved site	2.7.2.3	Phosphoglycerate kinase,	ATP + 3-phospho-D-glycerate = ADP + 3-phospho-D-glyceroyl phosphate,	Carbon fixation	Energy Metabolism	3-phosphoglycerate kinase	Carbohydrate transport and metabolism
10917	1444733	NO	11.49	13.74	-2.25	0.85928	11.71	13.15	-1.45	1	0	0	0	0	0	0
10916	1443437	NO	12.01	13.73	-1.73	1	11.68	13.25	-1.57	1	0	0	0	0	0	0
10915	1441584	NO	12.03	12.88	-0.85	1	12.36	13.25	-0.89	1	0	0	2	0	0	0	binding | transport | membrane	Mitochondrial substrate carrier						Mitochondrial phosphate carrier protein	Energy production and conversion
10914	1439918	NO	11.93	13.43	-1.51	1	12.32	13.07	-0.75	1	0	0	0	0	0	0	translation initiation factor activity | translational initiation	Translation initiation factor SUI1						Translation initiation factor 1 (eIF-1/SUI1)	Translation, ribosomal structure and biogenesis
10913	1438975	NO	12.42	13.35	-0.93	1	12.56	13.5	-0.94	1	0	0	0	0	0	0		Cyclin | Cyclin-like | Cyclin, N-terminal						Cyclin	General function prediction only
10912	1438865	NO	12.24	13.3	-1.06	1	12.06	13	-0.94	1	0	0	3	0	2	0	ATP binding | protein folding | unfolded protein binding	Heat shock protein 70 | Heat shock protein Hsp70 | Chaperone DnaK						Molecular chaperones mortalin/PBP74/GRP75, HSP70 superfamily	Posttranslational modification, protein turnover, chaperones
7869	1549741	NO	11.5	10.24	1.26	1	10.79	9.54	1.25	1	0	0	0	0	0	0	catalytic activity | metabolic process | 4-coumarate-CoA ligase activity	AMP-dependent synthetase and ligase	6.2.1.12	4-coumarate--CoA ligase,	ATP + 4-coumarate + CoA = AMP + diphosphate + 4-coumaroyl-CoA,	Flavonoids, stilbene and lignin biosynthesis	Biosynthesis of Secondary Metabolites	Acyl-CoA synthetase	Lipid transport and metabolism
10910	1434182	NO	11.61	13.11	-1.5	1	12.09	12.99	-0.9	1	0	0	0	0	0	0	tRNA processing | tRNA binding | tRNA-pseudouridine synthase activity | pseudouridine synthesis | pseudouridylate synthase activity	Cupredoxin | tRNA pseudouridine synthase	4.2.1.70	Pseudouridylate synthase,	Uracil + D-ribose 5-phosphate = pseudouridine 5'-phosphate + H(2)O,	Pyrimidine metabolism	Nucleotide Metabolism	Pseudouridylate synthase	Translation, ribosomal structure and biogenesis
10909	1428116	NO	12.02	12.64	-0.62	1	11.98	13.02	-1.04	1	0	0	0	0	0	0	ATP binding | nucleic acid binding | ATP-dependent helicase activity | helicase activity	DEAD-like helicase, N-terminal | Helicase, superfamily 1 and 2, ATP-binding | DNA/RNA helicase, DEAD/DEAH box type, N-terminal | DNA/RNA helicase, C-terminal | RNA helicase, DEAD-box type, Q motif | RNA helicase, ATP-dependent, DEAD-box, conserved site						ATP-dependent RNA helicase	RNA processing and modification
10908	1426114	NO	11.99	13.32	-1.33	1	11.88	12.87	-1	1	0	0	0	0	0	0	hydrolase activity, acting on carbon-nitrogen (but not peptide) bonds | nitrogen compound metabolic process	Nitrilase/cyanide hydratase and apolipoprotein N-acyltransferase						von Willebrand factor and related coagulation proteins | von Willebrand factor and related coagulation proteins	Extracellular structures
10907	1422045	NO	12.39	12.68	-0.29	1	12.06	14.39	-2.33	0.966469	0	0	15	0	8	0	iron ion binding | monooxygenase activity | electron transport | heme binding | peroxidase activity | response to oxidative stress	Cytochrome P450 | Haem peroxidase | Haem peroxidase, animal						Peroxidase/oxygenase	General function prediction only
10906	1414839	NO	11.45	13.38	-1.94	1	11.86	12.89	-1.04	1	0	0	0	0	8	0	urate oxidase activity | purine base metabolic process	Uricase	1.7.3.3	Urate oxidase,	Urate + O(2) + H(2)O = 5-hydroxyisourate + H(2)O(2),	Purine metabolism	Nucleotide Metabolism	Uricase (urate oxidase)	Secondary metabolites biosynthesis, transport and catabolism
10905	1408709	NO	11.88	12.9	-1.01	1	12.8	13.03	-0.23	1	0	0	0	0	0	0		Barwin-related endoglucanase | Rare lipoprotein A						Microtubule-associated protein TAU	Cytoskeleton
10904	1389269	YES	11.48	13.07	-1.59	1	12.17	12.86	-0.69	1	0	0	8	0	9	0	mitochondrial outer membrane | anion transport | voltage-gated anion channel activity	Porin, eukaryotic type						Porin/voltage-dependent anion-selective channel protein	Inorganic ion transport and metabolism
10903	1388314	NO	12.12	13.18	-1.05	1	11.84	13.14	-1.3	1	0	0	0	0	0	0	iron ion binding | monooxygenase activity | electron transport | heme binding | unspecific monooxygenase activity	Cytochrome P450 | Cytochrome P450, E-class, group I	1.14.14.1	Unspecific monooxygenase,	RH + reduced flavoprotein + O(2) = ROH + oxidized flavoprotein + H(2)O,	Tryptophan metabolism	Amino Acid Metabolism	Cytochrome P450 CYP2 subfamily	Secondary metabolites biosynthesis, transport and catabolism
10902	1034808	NO	12.13	12.94	-0.81	1	11.67	13.26	-1.58	1	0	0	0	0	0	0
10901	1518707	YES	9.6	4.91	4.69	9.10633e-31	12.85	5.19	7.66	1.75103e-110	0	0	4	0	7	0		Pectate lyase/Amb allergen | Pectin lyase fold/virulence factor
10900	1456600	YES	10.01	4.63	5.39	3.9166e-45	12	4.94	7.06	1.80214e-104	0	0	3	0	3	0		Glycoside hydrolase, family 61
10899	1447984	NO	7.9	5.56	2.35	1	13.2	5.46	7.74	7.95419e-34	0	0	0	0	0	0		CsbD-like
10898	1444895	NO	7.15	4.24	2.91	0.0214228	12.66	3.84	8.83	6.92608e-39	0	0	0	0	0	0
10897	94699	NO	9.96	5.52	4.45	1.75558e-36	10.6	5.56	5.05	1.40021e-49	0	0	0	0	0	0		MFS general substrate transporter | Protein of unknown function DUF895, eukaryotic						Uncharacterized conserved protein	Function unknown
10896	408994	NO	9.95	6.26	3.69	3.1153e-26	10.07	6.18	3.89	2.36895e-28	0	0	0	0	0	0
10895	1594805	YES	10.85	6.03	4.83	1.18376e-68	10.38	5.84	4.54	8.15618e-52	0	0	6	0	8	2
10894	1588227	NO	10.48	5.33	5.16	1.258e-51	10.82	5.76	5.06	3.71388e-47	0	0	0	0	0	0	binding | catalytic activity | metabolic process | (R,R)-butanediol dehydrogenase activity	NAD(P)-binding | Alcohol dehydrogenase, zinc-binding | Alcohol dehydrogenase GroES-like | GroES-like	1.1.1.4	(R,R)-butanediol dehydrogenase,	(R,R)-butane-2,3-diol + NAD(+) = (R)-acetoin + NADH,	Butanoate metabolism	Carbohydrate Metabolism	Sorbitol dehydrogenase	Secondary metabolites biosynthesis, transport and catabolism
10893	1549339	NO	10.56	5.44	5.12	2.27699e-11	10.24	5.88	4.36	3.68083e-06	0	0	0	0	0	0	catalytic activity | metabolic process | carboxyvinyl-carboxyphosphonate phosphorylmutase activity | sugar:hydrogen symporter activity | phosphoenolpyruvate-dependent sugar phosphotransferase system	Isocitrate lyase and phosphorylmutase, core | Isocitrate lyase and phosphorylmutase | Pyruvate/Phosphoenolpyruvate kinase, catalytic core | Phosphotransferase system, HPr serine phosphorylation site	2.7.8.23	Carboxyvinyl-carboxyphosphonate phosphorylmutase,	1-carboxyvinyl carboxyphosphonate = 3-(hydrohydroxyphosphoryl)pyruvate + CO(2),			Isocitrate lyase	Energy production and conversion
10892	1512741	YES	11	6.37	4.63	1.50972e-69	10.2	6.19	4.01	8.08843e-38	0	0	0	0	0	7	carbohydrate metabolic process | beta-galactosidase activity | beta-galactosidase complex	Glycoside hydrolase, catalytic core | Glycoside hydrolase, family 35	3.2.1.23	Beta-galactosidase,	Hydrolysis of terminal, non-reducing beta-D-galactose residues in beta-D-galactosides,	Glycosaminoglycan degradation	Metabolism of Complex Carbohydrates	Beta-galactosidase	Carbohydrate transport and metabolism
10891	1506651	YES	10.48	6.08	4.41	3.34635e-42	10.49	6.25	4.24	7.01281e-33	6	0	13	0	9	0	extracellular region | hydrolase activity, hydrolyzing O-glycosyl compounds | carbohydrate metabolic process | cellulose binding | pectate lyase activity	Cellulose-binding region, fungal | Pectin lyase fold/virulence factor | Pectate lyase, catalytic
10890	1506171	YES	10.84	5.77	5.06	8.63679e-42	10.99	6.22	4.78	1.86559e-29	0	0	0	0	0	0	electron transport | electron carrier activity | copper ion binding	Cupredoxin | Blue (type 1) copper domain
10889	1504866	NO	10.09	5.9	4.2	1.4894e-12	10.72	6.4	4.32	2.52363e-10	0	0	0	0	3	0	protein binding | hydrolase activity, hydrolyzing O-glycosyl compounds | carbohydrate metabolic process | cell communication | phosphoinositide binding | chitinase activity | endochitinase activity | chitin catabolic process	Glycoside hydrolase, catalytic core | Phox-like | Glycoside hydrolase, chitinase active site | Glycoside hydrolase, family 18, catalytic domain | Chitinase II	3.2.1.14	Chitinase,	Hydrolysis of the 1,4-beta-linkages of N-acetyl-D-glucosamine polymers of chitin,	Aminosugars metabolism	Metabolism of Complex Carbohydrates	Chitinase	Carbohydrate transport and metabolism
10888	1491725	YES	10.12	6.05	4.06	1.96163e-31	10.38	5.82	4.56	4.82303e-41	0	0	0	0	3	0	extracellular region | hydrolase activity, hydrolyzing O-glycosyl compounds | carbohydrate metabolic process | cellulose binding	Glycoside hydrolase, catalytic core | Cellulose-binding region, fungal | Glycoside hydrolase, family 5
11431	1442787	NO	10.04	9.8	0.24	1	10.44	9.22	1.22	1	0	0	0	0	3	0	hydrolase activity | catalytic activity | epoxide hydrolase activity	Alpha/beta hydrolase fold-1 | Epoxide hydrolase-like | Alpha/beta hydrolase						Soluble epoxide hydrolase	Lipid transport and metabolism
10886	1487086	YES	9.66	6.14	3.53	5.91434e-05	9.77	4.52	5.25	3.33206e-17	0	0	5	0	0	5	hydrolase activity, hydrolyzing O-glycosyl compounds | carbohydrate metabolic process | alpha-galactosidase activity	Glycoside hydrolase, catalytic core | Glycoside hydrolase, clan GH-D | Glycoside hydrolase, family 27	3.2.1.22	Alpha-galactosidase,	Melibiose + H(2)O = galactose + glucose,	Galactose metabolism	Carbohydrate Metabolism	Alpha-D-galactosidase (melibiase)	Carbohydrate transport and metabolism
10885	1465083	YES	9.94	5.5	4.44	2.94525e-28	10.22	5.34	4.87	9.24971e-33	0	0	3	0	4	7	proteolysis | subtilase activity | serine-type peptidase activity | tripeptidyl-peptidase I activity	Peptidase S8 and S53, subtilisin, kexin, sedolisin | Proteinase inhibitor, propeptide | Peptidase S53, propeptide	3.4.14.9	Tripeptidyl-peptidase I,	Release of an N-terminal tripeptide from a polypeptide,
10884	1452014	YES	9.99	6.33	3.66	9.26071e-23	10.3	4.88	5.42	1.19057e-58	3	0	13	0	9	0		Esterase, SGNH hydrolase-type
10883	1451519	NO	10.36	7.14	3.23	3.56774e-15	11.57	5.63	5.94	9.53597e-96	0	0	10	0	3	0	metabolic process | oxidoreductase activity	Tyrosinase | Di-copper centre-containing				ANDER: Tyrosinase
10882	1447737	NO	10.62	6.19	4.43	7.10825e-37	10.06	6.28	3.78	2.99838e-18	0	0	0	0	0	0		Immunoglobulin E-set | Glyoxal oxidase, N-terminal | Region of unknown function DUF1929 | Galactose oxidase/kelch, beta-propeller | TonB box, conserved site
10881	1443746	YES	10.58	6.02	4.56	8.76491e-48	9.84	6.36	3.48	3.57406e-16	0	0	0	0	0	0	hydrolase activity, hydrolyzing O-glycosyl compounds | carbohydrate metabolic process | chitinase activity | endochitinase activity	Glycoside hydrolase, catalytic core | Glycoside hydrolase, chitinase active site | Glycoside hydrolase, family 18, catalytic domain	3.2.1.14	Chitinase,	Hydrolysis of the 1,4-beta-linkages of N-acetyl-D-glucosamine polymers of chitin,	Aminosugars metabolism	Metabolism of Complex Carbohydrates	Chitinase	Cell wall/membrane/envelope biogenesis
10880	1431288	YES	10.62	5.85	4.76	2.59394e-42	10.18	5.29	4.9	2.33378e-39	3	0	9	0	11	0	glucosidase activity | arabinogalactan endo-1,4-beta-galactosidase activity	Glycoside hydrolase, catalytic core | Glycosyl hydrolase 53	3.2.1.89	Arabinogalactan endo-1,4-beta-galactosidase,	Endohydrolysis of 1,4-beta-D-galactosidic linkages in arabinogalactans,
10879	1397134	YES	11.14	5.33	5.81	3.78612e-85	10.42	5.44	4.98	3.30781e-54	0	0	4	0	6	0	extracellular region | hydrolase activity, hydrolyzing O-glycosyl compounds | carbohydrate metabolic process | cellulose binding	Cellulose-binding region, fungal | Concanavalin A-like lectin/glucanase | Glycoside hydrolase, family 11
10878	1396779	YES	10.28	5.68	4.6	2.11206e-32	11.88	5.27	6.61	2.64717e-76	0	0	2	0	2	0
10877	1380014	NO	10.96	6.99	3.98	7.52088e-29	10.19	5.36	4.83	1.06417e-41	0	0	21	0	32	16	proteolysis | peptidase activity	Peptidase M28 | Fibronectin, type III-like fold						Transferrin receptor and related proteins containing the protease-associated (PA) domain | Transferrin receptor and related proteins containing the protease-associated (PA) domain | Transferrin receptor and related proteins containing the protease-associated (PA) domain	Posttranslational modification, protein turnover, chaperones
10876	971890	NO	9.97	5.43	4.54	3.64757e-34	8.8	6.26	2.54	0.0380632	0	0	0	0	0	0
5782	1401520	NO	8.31	7.88	0.43	1	9.25	8.09	1.16	1	0	0	0	0	0	0	iron ion binding | monooxygenase activity | electron transport | heme binding | fluorene oxygenase activity | mono-butyltin dioxygenase activity | limonene 8-monooxygenase activity | tri-n-butyltin dioxygenase activity | di-n-butyltin dioxygenase activity | methylsilanetriol hydroxylase activity | methyl tertiary butyl ether 3-monooxygenase activity | 4-nitrocatechol 4-monooxygenase activity | 4-…	Cytochrome P450, E-class, group IV | Cytochrome P450	1.14.-.-	Acting on paired donors, with incorporation or reduction of		gamma-Hexachlorocyclohexane degradation	Biodegradation of Xenobiotics	Cytochrome P450 CYP4/CYP19/CYP26 subfamilies | Cytochrome P450 CYP4/CYP19/CYP26 subfamilies	Lipid transport and metabolism
10874	787096	NO	9.64	5.39	4.25	9.34593e-37	9.78	7.02	2.76	3.7138e-06	0	0	0	0	0	0		Cupin, RmlC-type | Cupin 2, conserved barrel
10873	268764	YES	9.52	5.48	4.04	7.48735e-23	10.31	5.92	4.39	3.34705e-26	3	0	3	0	7	0		Phosphatidylethanolamine-binding protein PEBP						Phosphatidylethanolamine binding protein	General function prediction only
10872	1593878	YES	9.66	6.03	3.63	7.13462e-24	9.79	5.83	3.96	2.83689e-29	0	0	2	0	2	0	extracellular region | hydrolase activity, hydrolyzing O-glycosyl compounds | carbohydrate metabolic process | cellulose binding | cellulase activity	Cellulose-binding region, fungal | Glycoside hydrolase, family 45 | Barwin-related endoglucanase
10871	1590569	YES	9.04	5.53	3.5	2.34573e-16	9.06	6.57	2.49	0.0220672	0	0	0	0	0	0		Glycoside hydrolase, catalytic core
10870	1511995	YES	9.22	6.12	3.1	4.31109e-13	10.02	6.16	3.86	1.13088e-29	0	0	0	0	0	0		Glycoside hydrolase, family 61
10869	1506660	YES	10.04	5.66	4.38	5.42839e-32	9.45	5.79	3.66	3.70148e-14	0	0	9	0	7	0	extracellular region | hydrolase activity, hydrolyzing O-glycosyl compounds | carbohydrate metabolic process | cellulose binding | pectate lyase activity	Cellulose-binding region, fungal | Pectin lyase fold/virulence factor | Pectate lyase, catalytic						Defense-related protein containing SCP domain	Function unknown
10868	1444252	NO	9.24	5.16	4.08	1.65183e-31	9.6	6.38	3.22	1.00098e-14	0	0	0	0	0	0	transport | membrane | amino acid transport | amino acid transmembrane transporter activity	Amino acid permease-associated region | Amino acid/polyamine transporter I						Amino acid transporters	Amino acid transport and metabolism
10867	1444006	NO	9.21	5.1	4.1	8.27532e-10	9.79	5.95	3.84	3.09414e-05	0	0	0	0	0	0	transport | membrane | transporter activity | integral to membrane | sugar:hydrogen symporter activity | carbohydrate transport | L-arabinose isomerase activity	MFS general substrate transporter | Major facilitator superfamily | General substrate transporter | Sugar transporter	5.3.1.4	L-arabinose isomerase,	L-arabinose = L-ribulose,	Pentose and glucuronate interconversions	Carbohydrate Metabolism	Predicted transporter (major facilitator superfamily)	General function prediction only
10866	1430075	NO	9.47	5.53	3.94	3.34202e-36	10.21	6.29	3.92	1.04496e-42	0	0	0	0	0	0
10865	1403798	YES	9.95	5.88	4.07	3.32512e-27	10.03	6.09	3.94	6.07985e-21	2	0	5	0	5	3
10864	1401347	NO	9.3	5.93	3.37	1.65126e-15	9.71	5.86	3.85	3.62152e-23	0	0	0	0	0	0	electron transport | oxidoreductase activity | F420H2 dehydrogenase activity | sulfur oxygenase reductase activity | malolactic enzyme activity | regulation of oxidoreductase activity	Taurine catabolism dioxygenase TauD/TfdA	1.-.-.-	Oxidoreductases,
10863	1233561	NO	9.3	5.29	4.01	7.31064e-21	10.11	5.89	4.22	3.84687e-22	0	0	0	0	0	0	transport | transporter activity | integral to membrane	MFS general substrate transporter | Major facilitator superfamily MFS-1 | Major facilitator superfamily						Synaptic vesicle transporter SVOP and related transporters (major facilitator superfamily)	General function prediction only
10862	1231575	YES	9.61	5.67	3.94	1.21901e-05	9.46	6.65	2.81	0.946789	0	0	0	0	0	0
10861	1439154	NO	10.05	5.98	4.07	3.27205e-06	8.56	6.68	1.88	1	0	0	0	0	0	0	zinc ion binding | nucleus | transcription factor activity | regulation of transcription, DNA-dependent	Fungal transcriptional regulatory protein, N-terminal
10860	1167269	YES	11.39	6.3	5.09	2.43656e-58	7.77	7.06	0.7	1	23	0	37	0	45	0	extracellular region | hydrolase activity, hydrolyzing O-glycosyl compounds | carbohydrate metabolic process | cellulose binding	Cellulose-binding region, fungal | Glycoside hydrolase, family 7 | Concanavalin A-like lectin/glucanase
10859	109625	YES	10.33	6.42	3.91	2.06983e-25	8.79	7.02	1.76	1	10	0	14	0	11	0	extracellular region | hydrolase activity, hydrolyzing O-glycosyl compounds | carbohydrate metabolic process | cellulose binding	Cellulose-binding region, fungal | Glycoside hydrolase, family 7 | Concanavalin A-like lectin/glucanase
10858	70270	YES	9.21	6.74	2.46	0.00236628	8.87	7.66	1.22	1	0	0	0	0	0	0	hydrolase activity, hydrolyzing O-glycosyl compounds | carbohydrate metabolic process | beta-glucosidase activity	Glycoside hydrolase, family 3, N-terminal | Glycoside hydrolase, family 3, C-terminal | Glycoside hydrolase, catalytic core	3.2.1.21	Beta-glucosidase,	Hydrolysis of terminal, non-reducing beta-D-glucose residues with release of beta-D-glucose,	Starch and sucrose metabolism	Metabolism of Complex Carbohydrates
10857	509176	NO	9.11	6.7	2.42	0.0317379	8.48	7.73	0.75	1	0	0	0	0	0	0	phosphoprotein phosphatase activity | calcium-dependent protein serine/threonine phosphatase activity | magnesium-dependent protein serine/threonine phosphatase activity | magnesium-dependent protein serine/threonine phosphatase complex | CTD phosphatase activity | calcium-dependent protein serine/threonine phosphatase regulator activity | myosin phosphatase activity | myosin phosphatase regulato…	Protein phosphatase 2C, N-terminal | Protein phosphatase 2C-related	3.1.3.16	Serine/threonine specific protein phosphatase,	A phosphoprotein + H(2)O = a protein + phosphate,			Protein phosphatase 2C/pyruvate dehydrogenase (lipoamide) phosphatase	Signal transduction mechanisms
10856	1593266	NO	9.87	5.99	3.87	6.94022e-27	8.71	7.76	0.95	1	0	0	0	0	0	0
10855	1457269	NO	9.88	5.39	4.49	3.17483e-43	9.04	7.88	1.16	1	0	0	0	0	0	0
10854	1455235	NO	9.44	6.38	3.06	1.61459e-08	8.62	7.7	0.92	1	0	0	0	0	0	0
10853	1455034	NO	9.6	5.94	3.65	9.3475e-28	8.79	7.96	0.83	1	0	0	0	0	0	0
10852	1440805	NO	9.05	6.43	2.62	9.28921e-06	8.78	7.71	1.06	1	0	0	0	0	0	0
10851	1019527	NO	9.38	6.72	2.67	0.000192144	8.62	7.66	0.96	1	0	0	0	0	0	0
10850	506195	NO	8.95	7.41	1.54	1	8.89	7.1	1.79	1	0	0	0	0	0	0
10849	500506	NO	9.17	6.97	2.21	0.294471	8.88	6.99	1.89	1	0	0	0	0	0	0	aromatic compound metabolic process | metabolic process | monooxygenase activity | electron transport | oxidoreductase activity | salicylate 1-monooxygenase activity	Aromatic-ring hydroxylase | Monooxygenase, FAD-binding	1.14.13.1	Salicylate 1-monooxygenase,	Salicylate + NADH + O(2) = catechol + NAD(+) + H(2)O + CO(2),	Fluorene degradation	Biodegradation of Xenobiotics	Kynurenine 3-monooxygenase and related flavoprotein monooxygenases | Kynurenine 3-monooxygenase and related flavoprotein monooxygenases	Energy production and conversion
10848	449840	YES	8.99	7.55	1.44	1	9.26	7.36	1.91	1	0	0	0	0	0	0
10847	1506683	YES	9.25	7.41	1.84	1	9.18	7.24	1.94	1	0	0	0	0	0	0
10846	1504125	NO	8.85	7.48	1.37	1	9.01	7.24	1.76	1	0	0	0	0	0	0	proteolysis | serine carboxypeptidase activity | carboxypeptidase D activity	Peptidase S10, serine carboxypeptidase	3.4.16.6	Carboxypeptidase D,	Preferential release of a C-terminal arginine or lysine residue,			Serine carboxypeptidases (lysosomal cathepsin A) | Serine carboxypeptidases (lysosomal cathepsin A)	Posttranslational modification, protein turnover, chaperones
10845	1500676	NO	8.79	7.47	1.32	1	9.2	7.29	1.92	1	0	0	0	0	0	0	transport | transporter activity | integral to membrane	MFS general substrate transporter | Major facilitator superfamily MFS-1 | Major facilitator superfamily						Permease of the major facilitator superfamily	Carbohydrate transport and metabolism
10844	1495048	NO	8.99	7.03	1.96	1	8.55	7.34	1.21	1	0	0	0	0	0	0	membrane | DNA-directed RNA polymerase activity | DNA-directed RNA polymerase I activity | DNA-directed RNA polymerase II activity | DNA-directed RNA polymerase III activity | RNA polymerase activity | metal ion transport | metal ion transmembrane transporter activity	Zinc/iron permease	2.7.7.6	DNA-directed RNA polymerase,	N nucleoside triphosphate = N diphosphate + {RNA}(N),	RNA polymerase	TRANSCRIPTION	Fe2+/Zn2+ regulated transporter	Inorganic ion transport and metabolism
10843	1481805	NO	8.88	7.17	1.71	1	8.89	6.71	2.19	0.990188	0	0	0	0	0	0	electron transport | oxidoreductase activity | F420H2 dehydrogenase activity | sulfur oxygenase reductase activity | malolactic enzyme activity | regulation of oxidoreductase activity	Taurine catabolism dioxygenase TauD/TfdA	1.-.-.-	Oxidoreductases,
10842	1471073	NO	8.57	7.65	0.92	1	9.16	6.94	2.23	0.908052	0	0	0	0	0	0	transport | membrane | integral to membrane | amino acid transport | amino acid transmembrane transporter activity	Amino acid permease-associated region | Amino acid/polyamine transporter I | Amino acid permease, conserved site						Amino acid transporters	Amino acid transport and metabolism
10841	1452425	NO	8.9	7.2	1.7	1	8.9	7.1	1.79	1	0	0	0	0	0	0
10840	1445616	NO	9.37	6.99	2.38	1	9.11	7.53	1.58	1	0	0	0	0	0	0	O-methyltransferase activity	O-methyltransferase, family 2						Hydroxyindole-O-methyltransferase and related SAM-dependent methyltransferases	General function prediction only
10839	1443575	NO	8.96	6.94	2.02	1	8.63	7.47	1.16	1	0	0	0	0	0	0
10838	1440045	YES	9.03	7.47	1.56	1	8.68	7.11	1.57	1	0	0	0	0	0	0	lysozyme activity | peptidoglycan catabolic process | cell wall catabolic process	Glycoside hydrolase, catalytic core | Glycoside hydrolase, family 25
10837	1402579	YES	9.01	7.23	1.78	1	9.09	7.39	1.7	1	0	0	0	0	0	0
10836	1394126	NO	8.91	7	1.91	1	8.78	7.56	1.23	1	0	0	0	0	0	0		Src homology-3
10835	1387588	NO	8.89	7.31	1.59	1	8.62	7.54	1.08	1	0	0	0	0	0	0
10834	1147873	NO	8.94	7.26	1.68	1	9.2	7.32	1.88	1	0	0	0	0	0	0
10833	402818	NO	9.09	7.23	1.86	1	9.39	7.62	1.77	1	0	0	0	0	0	0		Carboxylesterase, type B						Carboxylesterase and related proteins	General function prediction only
10832	398254	NO	8.71	7.55	1.16	1	9.05	8.06	0.99	1	0	0	0	0	0	0	binding	Armadillo-type fold
10831	311594	NO	9.06	7.79	1.27	1	9.27	7.75	1.52	1	0	0	0	0	0	0
10830	1511969	NO	9.14	7.24	1.9	1	9.29	7.81	1.48	1	0	0	0	0	0	0
10829	1510672	NO	9.08	7.48	1.6	1	9.07	8.09	0.98	1	0	0	0	0	0	0	metabolic process | oxidoreductase activity | salicylate 1-monooxygenase activity	FAD dependent oxidoreductase | Aromatic-ring hydroxylase	1.14.13.1	Salicylate 1-monooxygenase,	Salicylate + NADH + O(2) = catechol + NAD(+) + H(2)O + CO(2),	Fluorene degradation	Biodegradation of Xenobiotics	Kynurenine 3-monooxygenase and related flavoprotein monooxygenases | Kynurenine 3-monooxygenase and related flavoprotein monooxygenases	Energy production and conversion
10828	1508118	NO	8.82	7.86	0.96	1	9.29	7.57	1.72	1	0	0	0	0	0	0
10827	1503071	NO	8.91	7.4	1.51	1	9.09	7.66	1.44	1	0	0	0	0	0	0
10826	1494194	NO	8.98	7.79	1.19	1	9.01	7.84	1.17	1	0	0	0	0	0	0		Src homology-3 | Variant SH3						Splicing coactivator SRm160/300, subunit SRm300	RNA processing and modification
10825	1480724	NO	9.28	7.91	1.38	1	9.1	7.84	1.26	1	0	0	0	0	0	0	binding | transport | membrane | transporter activity | mitochondrial inner membrane	Mitochondrial substrate carrier | Adenine nucleotide translocator 1						Mitochondrial carrier protein MRS3/4	Energy production and conversion
5228	1502924	NO	8.61	8.62	-0.02	1	8.91	7.77	1.15	1	0	0	0	0	0	0	integral to membrane | protein-S-isoprenylcysteine O-methyltransferase activity | C-terminal protein amino acid methylation	Isoprenylcysteine carboxyl methyltransferase						Sterol reductase/lamin B receptor | Sterol reductase/lamin B receptor	Lipid transport and metabolism
10823	1448762	NO	8.94	7.77	1.17	1	8.93	7.56	1.37	1	0	0	0	0	0	0		Lipopolysaccharide-modifying protein						Endoplasmic reticulum protein EP58, contains filamin rod domain and KDEL motif	General function prediction only
10822	1444837	NO	9.35	7.65	1.7	1	9.09	7.95	1.14	1	0	0	0	0	0	0	iron ion binding | monooxygenase activity | electron transport | heme binding	Cytochrome P450, E-class, group IV | Cytochrome P450						Cytochrome P450 CYP3/CYP5/CYP6/CYP9 subfamilies	Secondary metabolites biosynthesis, transport and catabolism
10821	1438411	NO	8.99	7.38	1.62	1	9.58	7.97	1.61	1	0	0	0	0	0	0		Proteinase inhibitor, propeptide
10820	1408942	NO	8.86	7.4	1.46	1	8.85	7.9	0.95	1	0	0	0	0	0	0	transport | membrane | amino acid transport | amino acid transmembrane transporter activity	Amino acid permease-associated region | Amino acid/polyamine transporter I						Amino acid transporters	Amino acid transport and metabolism
10819	1386958	NO	9.17	7.58	1.59	1	9.32	7.91	1.41	1	0	0	0	0	0	0	transport | membrane | amino acid transport | amino acid transmembrane transporter activity	Amino acid permease-associated region | Amino acid/polyamine transporter I						Amino acid transporters	Amino acid transport and metabolism
10818	1380264	YES	9.29	7.25	2.04	1	9.3	7.83	1.48	1	0	0	2	0	2	5	carbohydrate metabolic process | polygalacturonase activity	Pectin lyase fold/virulence factor | Parallel beta-helix repeat | Glycoside hydrolase, family 28	3.2.1.15	Polygalacturonase,	Random hydrolysis of 1,4-alpha-D-galactosiduronic linkages in pectate and other galacturonans,	Pentose and glucuronate interconversions	Carbohydrate Metabolism
10817	1213361	NO	9.41	7.7	1.7	1	8.99	7.79	1.2	1	0	0	0	0	0	0								Nucleolar GTPase/ATPase p130	Nuclear structure
10816	1114105	NO	8.97	7.42	1.54	1	9.27	7.56	1.71	1	0	0	0	0	2	0
10815	989529	NO	9.36	8.08	1.28	1	9.35	8.25	1.1	1	0	0	0	0	0	0	metabolic process | methyltransferase activity	Methyltransferase type 11						RNA polymerase II, large subunit	Transcription
10814	309489	NO	9.02	8.21	0.81	1	9.45	8.5	0.95	1	0	0	0	0	0	0	protein binding	BTB/POZ-like | BTB/POZ fold | BTB/POZ
10813	1590342	NO	9.05	8.23	0.82	1	9.27	8.04	1.23	1	0	0	0	0	0	0
10812	1590181	NO	9.32	8.35	0.96	1	9.08	8.08	1	1	0	0	0	0	0	0	transmembrane receptor protein serine/threonine kinase activity | 3-phosphoinositide-dependent protein kinase activity | DNA-dependent protein kinase activity | AMP-activated protein kinase activity | casein kinase activity | casein kinase I activity | cyclic nucleotide-dependent protein kinase activity | eukaryotic translation initiation factor 2alpha kinase activity | galactosyltransferase-asso…							Putative transcription factor HALR/MLL3, involved in embryonic development	General function prediction only
10811	1586256	NO	9.01	8.45	0.56	1	9.33	8.36	0.97	1	0	0	0	0	0	0
10810	1565329	NO	9.1	8	1.1	1	9.37	8.4	0.97	1	0	0	0	0	0	0		C2 calcium-dependent membrane targeting | C2 calcium/lipid-binding region, CaLB
10809	1502253	NO	9.28	8.14	1.14	1	9.12	8.36	0.76	1	0	0	0	0	0	0
10808	1501310	NO	9.08	8.12	0.96	1	9.38	8.2	1.17	1	0	0	0	0	0	0								Serine/threonine protein kinase	Signal transduction mechanisms
10807	1493248	NO	9.15	8.18	0.97	1	9.45	7.97	1.49	1	0	0	0	0	0	0		Amino acid transporter, transmembrane						Amino acid transporters	Amino acid transport and metabolism
10806	1483055	YES	9.08	7.98	1.11	1	9.31	8.21	1.1	1	0	0	0	0	0	0	hydrolase activity, hydrolyzing O-glycosyl compounds | carbohydrate metabolic process | alpha-glucosidase activity	Glycoside hydrolase, catalytic core | Glycoside hydrolase, family 31	3.2.1.20	Alpha-glucosidase,	Hydrolysis of terminal, non-reducing 1,4-linked D-glucose residues with release of D-glucose,	Galactose metabolism	Carbohydrate Metabolism	Maltase glucoamylase and related hydrolases, glycosyl hydrolase family 31	Carbohydrate transport and metabolism
10805	1482334	NO	8.96	8.38	0.59	1	9.48	8.16	1.32	1	0	0	0	0	0	0	hydrolase activity | metabolic process | phospholipase activity | lipase activity | 1-oxa-2-oxocycloheptane lactonase activity | sulfolactone hydrolase activity | 3,4-dihydrocoumarin hydrolase activity | butyrolactone hydrolase activity	Alpha/beta hydrolase fold-3	3.1.1.-	Carboxylic ester hydrolases,		2,4-Dichlorobenzoate degradation	Biodegradation of Xenobiotics	Arylacetamide deacetylase	Defense mechanisms
10804	1457884	NO	9.16	8.24	0.92	1	9.09	8.07	1.02	1	0	0	0	0	0	0	intracellular | regulation of small GTPase MEANted signal transduction | GTPase activator activity	Rap/ran-GAP						Tuberin - Rap/ran-GTPase-activating protein | Tuberin - Rap/ran-GTPase-activating protein	Cell cycle control, cell division, chromosome partitioning
10803	1452148	NO	8.88	8.09	0.79	1	9.59	8.16	1.43	1	0	0	0	0	0	0
10802	1450438	NO	9.21	8.42	0.8	1	9.22	8.05	1.16	1	0	0	0	0	0	0
10801	1446008	NO	9.25	8.47	0.78	1	9.2	8.12	1.08	1	0	0	0	0	0	0
10800	1439065	NO	8.84	8.14	0.71	1	9.4	8.22	1.19	1	0	0	0	0	0	0
10799	1438666	NO	9.21	8.12	1.09	1	9.4	8.08	1.31	1	0	0	0	0	0	0
10798	1437897	NO	9.09	8.2	0.9	1	9.28	8.31	0.97	1	0	0	0	0	0	0
10797	1431467	NO	9.22	7.99	1.23	1	9.51	8.34	1.17	1	0	0	0	0	0	0	ATP binding | nucleotide binding | nucleoside-triphosphatase activity | threonine endopeptidase activity | proteasome endopeptidase activity	AAA+ ATPase, core | AAA ATPase, core	3.4.25.1	Proteasome endopeptidase complex,	Cleavage at peptide bonds with very broad specificity,			26S proteasome regulatory complex, ATPase RPT6	Posttranslational modification, protein turnover, chaperones
10796	1430578	NO	9.26	7.86	1.4	1	9.51	8.14	1.37	1	0	0	0	0	0	0
10795	1380116	NO	8.89	7.91	0.97	1	9.45	8.42	1.03	1	0	0	0	0	0	0
10794	1155262	NO	9.2	8.16	1.03	1	9.36	8.31	1.05	1	0	0	0	0	0	0								MAPK-activating protein DENN	Signal transduction mechanisms
10793	1034333	YES	9.26	8.04	1.22	1	9.32	8.33	0.98	1	0	0	0	0	0	0								Translation initiation factor 4F, ribosome/mRNA-bridging subunit (eIF-4G)	Translation, ribosomal structure and biogenesis
10792	873101	NO	9.01	8.46	0.55	1	9.52	8.5	1.02	1	0	0	0	0	0	0	intracellular | structural constituent of ribosome | ribosome | translation	Ribosomal protein S10						Mitochondrial ribosomal protein S10	Translation, ribosomal structure and biogenesis
8429	1455818	NO	10.83	11.37	-0.54	1	11.09	9.97	1.12	1	0	0	8	0	8	0	catalytic activity | metabolic process | enoyl-CoA hydratase activity	Crotonase, core	4.2.1.17	Enoyl-CoA hydratase,	(3S)-3-hydroxyacyl-CoA = trans-2(or 3)-enoyl-CoA + H(2)O,	Fatty acid metabolism	Lipid Metabolism	Enoyl-CoA hydratase/isomerase	Lipid transport and metabolism
10790	19017	NO	8.7	8.63	0.07	1	9.59	8.53	1.07	1	0	0	0	0	0	0	unfolded protein binding | microtubule | tubulin folding	Tubulin binding cofactor A						Beta-tubulin folding cofactor A	Posttranslational modification, protein turnover, chaperones
5774	1427777	NO	8.16	9.11	-0.95	1	9.29	8.18	1.1	1	0	0	0	0	0	0	iron ion binding | monooxygenase activity | electron transport | heme binding	Cytochrome P450 | Cytochrome P450, E-class, group I						Cytochrome P450 CYP4/CYP19/CYP26 subfamilies | Cytochrome P450 CYP4/CYP19/CYP26 subfamilies	Lipid transport and metabolism
10788	1480278	NO	8.96	8.67	0.29	1	9.33	8.6	0.74	1	0	0	0	0	0	0
10787	1479160	NO	8.82	8.86	-0.04	1	9.59	8.53	1.06	1	0	0	0	0	0	0	ATP binding	Mrp, conserved site						Predicted ATPase, nucleotide-binding	Cell cycle control, cell division, chromosome partitioning
10786	1462707	NO	9.09	8.77	0.32	1	9.64	8.84	0.8	1	0	0	0	0	5	0	nitrogen compound metabolic process | glutamate-ammonia ligase activity | glutamine biosynthetic process	Glutamine synthetase, catalytic region | Glutamine synthetase, beta-Grasp	6.3.1.2	Glutamate--ammonia ligase,	ATP + L-glutamate + NH(3) = ADP + phosphate + L-glutamine,	Peptidoglycan biosynthesis	Metabolism of Complex Carbohydrates	Glutamine synthetase	Amino acid transport and metabolism
10785	1459215	NO	9.03	8.61	0.42	1	9.55	8.69	0.86	1	0	0	0	0	0	0
10784	1456431	NO	8.88	8.44	0.44	1	9.88	8.91	0.97	1	0	0	0	0	0	0
10783	1447687	NO	8.97	8.39	0.58	1	9.91	8.48	1.43	1	0	0	0	0	0	0								Uncharacterized conserved protein	Function unknown
10782	1443523	NO	9.05	8.77	0.29	1	9.52	8.31	1.21	1	0	0	0	0	0	0
3360	1501687	NO	7.51	7.56	-0.04	1	8.03	6.97	1.06	1	0	0	0	0	0	0	catalytic activity | metabolic process | enoyl-CoA hydratase activity	Crotonase, core	4.2.1.17	Enoyl-CoA hydratase,	(3S)-3-hydroxyacyl-CoA = trans-2(or 3)-enoyl-CoA + H(2)O,	Fatty acid metabolism	Lipid Metabolism	Enoyl-CoA hydratase/isomerase	Lipid transport and metabolism
10780	914418	NO	9.05	8.9	0.15	1	9.23	8.96	0.27	1	0	0	0	0	0	0	transport | transporter activity | integral to membrane	MFS general substrate transporter | Major facilitator superfamily MFS-1 | Major facilitator superfamily						Synaptic vesicle transporter SVOP and related transporters (major facilitator superfamily)	General function prediction only
10779	818585	NO	9.15	8.71	0.44	1	9.29	9.05	0.25	1	0	0	0	0	0	0
10778	310830	YES	9.14	8.83	0.31	1	9.09	8.97	0.12	1	0	0	0	0	0	0								Nuclear pore complex, Nup98 component (sc Nup145/Nup100/Nup116) | Nuclear pore complex, Nup98 component (sc Nup145/Nup100/Nup116)	Nuclear structure
10777	1584563	NO	9.12	8.92	0.19	1	9.24	8.84	0.4	1	0	0	0	0	0	0		Protein of unknown function DUF1754, eukaryotic						Conserved alpha-helical protein	Function unknown
10776	1571649	NO	9.11	8.78	0.32	1	9.08	8.99	0.1	1	0	0	0	0	0	0	ATP binding | protein kinase activity | protein amino acid phosphorylation | protein-tyrosine kinase activity | protein serine/threonine kinase activity | transmembrane receptor protein serine/threonine kinase activity | 3-phosphoinositide-dependent protein kinase activity | DNA-dependent protein kinase activity | AMP-activated protein kinase activity | casein kinase activity | casein kinase I ac…	Protein kinase-like | Protein kinase, core | Serine/threonine protein kinase-related | Tyrosine protein kinase | Serine/threonine protein kinase						Tyrosine kinase specific for activated (GTP-bound) p21cdc42Hs	Signal transduction mechanisms
10775	1506217	NO	9.26	8.8	0.47	1	9.3	9.05	0.25	1	0	0	0	0	0	0								Uncharacterized conserved protein	Function unknown
10774	1502910	NO	9.02	8.71	0.31	1	9.36	9.09	0.27	1	0	0	0	0	0	0		CHCH | MTCP1						Uncharacterized conserved protein	Function unknown
10773	1500863	NO	9.28	8.81	0.47	1	9.41	8.84	0.57	1	0	0	0	0	0	0
10772	1495097	NO	9.19	8.64	0.55	1	9.45	9.05	0.4	1	0	0	0	0	0	0		Trypanosome RHS
10771	1494712	NO	9.1	8.8	0.31	1	9.4	9.18	0.23	1	0	0	0	0	0	0	magnesium ion binding | thiamin pyrophosphate binding | acetolactate synthase activity	Thiamine pyrophosphate enzyme, central region | Thiamine pyrophosphate enzyme, N-terminal TPP binding region						Thiamine pyrophosphate-requiring enzyme | Thiamine pyrophosphate-requiring enzyme	Amino acid transport and metabolism
10770	1458166	NO	9.19	8.94	0.25	1	9.37	8.83	0.54	1	0	0	0	0	0	0								Galactokinase	Carbohydrate transport and metabolism
10769	1454158	NO	9.33	8.65	0.68	1	9.32	8.78	0.54	1	0	0	0	0	0	0	riboflavin kinase activity | riboflavin biosynthetic process	Riboflavin kinase	2.7.1.26	Riboflavin kinase,	ATP + riboflavin = ADP + FMN,	Riboflavin metabolism	Metabolism of Cofactors and Vitamins	Riboflavin kinase	Coenzyme transport and metabolism
10768	1452979	NO	9.03	8.68	0.35	1	9.12	8.99	0.13	1	0	0	0	0	0	0	protein binding	BTB/POZ-like | BTB/POZ fold						beta-1,6-N-acetylglucosaminyltransferase, contains WSC domain | beta-1,6-N-acetylglucosaminyltransferase, contains WSC domain	Carbohydrate transport and metabolism
11052	1438172	NO	12.14	10.52	1.62	1	11.46	10.41	1.05	1	0	0	18	0	14	0	catalytic activity | epoxide hydrolase activity	Alpha/beta hydrolase fold-1 | Epoxide hydrolase-like						Soluble epoxide hydrolase	Lipid transport and metabolism
10766	1450823	NO	9.09	8.94	0.15	1	9.36	8.75	0.61	1	0	0	0	0	0	0	transmembrane receptor protein serine/threonine kinase activity | 3-phosphoinositide-dependent protein kinase activity | DNA-dependent protein kinase activity | AMP-activated protein kinase activity | casein kinase activity | casein kinase I activity | cyclic nucleotide-dependent protein kinase activity | eukaryotic translation initiation factor 2alpha kinase activity | galactosyltransferase-asso…	Protein of unknown function DUF262						Homeobox protein	General function prediction only
10765	1449234	NO	9.16	8.69	0.47	1	9.18	8.89	0.28	1	0	0	0	0	0	0	hydrolase activity	Hydantoinase/oxoprolinase | Hydantoinaseoxoprolinase, N-terminal | Protein of unknown function DUF917						Oxoprolinase	Amino acid transport and metabolism
10764	1446529	NO	9.18	8.82	0.36	1	9.3	8.95	0.35	1	0	0	0	0	0	0		Ankyrin | Dilute						Myosin class V heavy chain	Cytoskeleton
10763	1446083	NO	9.23	8.68	0.54	1	9.25	8.89	0.36	1	0	0	0	0	0	0	catalytic activity | carbohydrate metabolic process | glucan 1,4-alpha-glucosidase activity | carbohydrate binding | polysaccharide catabolic process | polysaccharide metabolic process	Six-hairpin glycosidase-like | Glycoside hydrolase, carbohydrate-binding | Glycoside hydrolase, family 15 | Glycoside hydrolase 15-related | Glucan 1,4-alpha-glucosidase, starch-binding | Carbohydrate-binding-like fold	3.2.1.3	Glucan 1,4-alpha-glucosidase,	Hydrolysis of terminal 1,4-linked alpha-D-glucose residues successively from non-reducing ends of the chains with release of beta-D-glucose,	Starch and sucrose metabolism	Metabolism of Complex Carbohydrates
10762	1444001	YES	9.03	8.75	0.28	1	9.3	8.85	0.45	1	0	0	0	0	0	0	catalytic activity | carbohydrate binding | carbohydrate catabolic process	Cytochrome b561 / ferric reductase transmembrane | DOMON related | Carbohydrate-binding family 9/cellobiose dehydrogenase, cytochrome						Predicted membrane protein, contains DoH and Cytochrome b-561/ferric reductase transmembrane domains	Signal transduction mechanisms
10761	1442812	NO	9.15	8.91	0.24	1	9.17	9.02	0.15	1	0	0	0	0	0	0	binding	Armadillo-type fold | HEAT						Uncharacterized conserved protein	Function unknown
10760	1441341	NO	9.24	8.73	0.5	1	9.32	8.84	0.47	1	0	0	0	0	0	0	membrane	Protein of unknown function DUF6, transmembrane						Predicted membrane protein	Function unknown
10759	1440706	NO	9.13	8.59	0.54	1	9.46	9.01	0.45	1	0	0	0	0	0	0		Protein of unknown function DUF1748, fungi
10758	1439946	NO	9.02	8.78	0.23	1	9.19	8.85	0.33	1	0	0	0	0	0	0		WD40 repeat | WD40 repeat-like						Predicted E3 ubiquitin ligase	Posttranslational modification, protein turnover, chaperones
10757	1438529	NO	9.2	8.88	0.32	1	9.34	8.9	0.45	1	0	0	0	0	0	0	protein binding | zinc ion binding	Zinc finger, RING-type | EGF-like region, conserved site | Zinc finger, TRAF-type | TRAF-like						TNF receptor-associated factor	Signal transduction mechanisms
10756	1438204	NO	9.04	8.75	0.29	1	9.17	9.03	0.14	1	0	0	0	0	0	0
10755	1428812	NO	9.29	8.83	0.46	1	9.11	9.05	0.06	1	0	0	0	0	0	0		Protein of unknown function DUF803						Uncharacterized conserved protein	Function unknown
10754	1423293	NO	9.16	8.81	0.35	1	9.13	9	0.13	1	0	0	0	0	0	0
10753	1417352	NO	9.17	8.83	0.35	1	9.16	8.9	0.26	1	0	0	0	0	0	0	integral to membrane | endoplasmic reticulum membrane | GPI anchor biosynthetic process	Glycosylphosphatidylinositol anchor biosynthesis						Ethanolamine-P-transferase GPI11/PIG-F, involved in glycosylphosphatidylinositol anchor biosynthesis | Ethanolamine-P-transferase GPI11/PIG-F, involved in glycosylphosphatidylinositol anchor biosynthesis	Cell wall/membrane/envelope biogenesis
10752	1413473	NO	9.25	8.73	0.53	1	9.07	8.9	0.17	1	0	0	0	0	0	0	glucan 1,4-alpha-glucosidase activity	Lipid-binding START	3.2.1.3	Glucan 1,4-alpha-glucosidase,	Hydrolysis of terminal 1,4-linked alpha-D-glucose residues successively from non-reducing ends of the chains with release of beta-D-glucose,	Starch and sucrose metabolism	Metabolism of Complex Carbohydrates	von Willebrand factor and related coagulation proteins | von Willebrand factor and related coagulation proteins	Extracellular structures
10751	1402742	NO	9.25	8.78	0.48	1	9.26	9.04	0.22	1	0	0	0	0	0	0		Lanthionine synthetase C-like						Lanthionine synthetase C-like protein 1	Defense mechanisms
10750	1397630	NO	8.97	8.79	0.17	1	9.22	9.01	0.21	1	0	0	0	0	0	0	integral to membrane | endoplasmic reticulum membrane | GPI anchor biosynthetic process	GPI transamidase subunit PIG-U	2.6.-.-	Transferring nitrogenous groups,				Major facilitator superfamily permease - Cdc91p	General function prediction only
10749	1390609	NO	9.29	8.88	0.41	1	9.39	8.84	0.55	1	0	0	0	0	0	0	metabolic process | N-acetyltransferase activity | dihydrolipoamide branched chain acyltransferase activity | H2A/H2B histone acetyltransferase activity | H3/H4 histone acetyltransferase activity | O-acyltransferase activity | acyltransferase activity | palmitoleoyl [acyl-carrier-protein]-dependent acyltransferase activity | carnitine O-acyltransferase activity | acetyltransferase activity | C-ac…	Acyl-CoA N-acyltransferase | GCN5-related N-acetyltransferase	2.3.1.-	Transferring groups other than amino-acyl groups,		Benzoate degradation via CoA ligation	Biodegradation of Xenobiotics	Acetyltransferase, (GNAT) family	General function prediction only
10748	1386094	NO	9.37	8.9	0.47	1	9.32	8.86	0.46	1	0	0	0	0	0	0		Glycoside hydrolase, family 85						Predicted glycosylhydrolase	General function prediction only
10747	1385713	NO	9.28	8.89	0.4	1	9.45	8.91	0.54	1	0	0	0	0	0	0	protein binding | zinc ion binding	Zinc finger, FYVE-type | Zinc finger, FYVE-related | Zinc finger, FYVE/PHD-type | Ankyrin | Zinc finger, RING-type						FYVE finger containing protein	General function prediction only
10746	884089	NO	9.3	9.24	0.06	1	9.61	9.12	0.49	1	0	0	0	0	0	0		Carboxylesterase, type B
10745	842286	NO	9.2	8.79	0.41	1	9.49	9.3	0.18	1	0	0	0	0	0	0	signal transduction | intracellular signaling cascade | phospholipase C activity	Phospholipase C, phosphatidylinositol-specific , X region
10744	726751	NO	9.48	9.14	0.35	1	9.66	9.12	0.54	1	0	0	0	0	0	0								Inositol polyphosphate 5-phosphatase and related proteins	Intracellular trafficking, secretion, and vesicular transport
10743	707079	NO	9.38	9.01	0.37	1	9.51	9.21	0.31	1	0	0	0	0	0	0	intracellular | zinc ion binding | nucleic acid binding	Zinc finger, C2H2-type
10742	506920	NO	9.28	9.15	0.13	1	9.52	9.15	0.37	1	0	0	0	0	0	0	nuclear chromosome	Rad21/Rec8 like protein, C-terminal | Rad21/Rec8 like protein, N-terminal						Sister chromatid cohesion complex Cohesin, subunit RAD21/SCC1	Cell cycle control, cell division, chromosome partitioning
10741	358904	NO	9.3	8.94	0.36	1	9.48	9.35	0.13	1	0	0	0	0	0	0
10740	194227	NO	9.49	9.15	0.34	1	9.62	9.22	0.39	1	0	0	0	0	0	0	hydrolase activity | bis(5'-nucleosyl)-tetraphosphatase (symmetrical) activity	Metallophosphoesterase	3.6.1.41	Bis(5'-nucleosyl)-tetraphosphatase (symmetrical),	P(1),P(4)-bis(5'-adenosyl)tetraphosphate + H(2)O = 2 ADP,	Purine metabolism	Nucleotide Metabolism
10739	1565125	YES	9.47	8.94	0.53	1	9.61	9.37	0.24	1	0	0	0	0	0	0								H/ACA small nucleolar RNP component GAR1	Translation, ribosomal structure and biogenesis
10738	1551918	NO	9.42	8.85	0.57	1	9.75	8.97	0.78	1	0	0	0	0	0	0	catalytic activity | metabolic process | phosphoric monoester hydrolase activity	Haloacid dehalogenase-like hydrolase | HAD-superfamily hydrolase, subfamily IB, hypothetical 1 | HAD-superfamily hydrolase, subfamily IB, PSPase-like
10737	1506130	NO	9.19	8.86	0.33	1	9.63	9.03	0.6	1	0	0	0	0	0	0
10736	1502269	NO	9.34	9.04	0.3	1	9.58	9.29	0.29	1	0	0	0	0	0	0	binding | catalytic activity | metabolic process	NAD(P)-binding
10735	1502200	NO	9.58	8.83	0.75	1	9.74	9.04	0.71	1	0	0	0	0	0	0								Serine/threonine protein kinase	Signal transduction mechanisms
10734	1492196	NO	9.4	9.15	0.25	1	9.47	9.3	0.17	1	0	0	0	0	0	0	zinc ion binding | nucleus | transcription factor activity | regulation of transcription, DNA-dependent | DNA binding | transcription	Fungal transcriptional regulatory protein, N-terminal | Fungal specific transcription factor
10733	1456650	NO	9.41	8.85	0.56	1	9.6	9.07	0.53	1	0	0	0	0	0	0		Conserved hypothetical protein CHP00245
10732	1456622	NO	9.63	8.97	0.66	1	9.75	9.21	0.54	1	0	0	0	0	0	0		Fip1						Polyadenylation factor I complex, subunit FIP1	RNA processing and modification
10731	1455277	NO	9.51	8.9	0.61	1	9.74	9.15	0.59	1	0	0	0	0	0	0	phosphopantetheine binding	Cyclin-like F-box | Phosphopantetheine attachment site | Pentaxin
10730	1453961	NO	9.44	9.01	0.44	1	9.45	9.07	0.38	1	0	0	0	0	0	0	UDP-N-acetylmuramoylalanyl-D-glutamyl-2,6-diaminopimelate-D-alanyl-D-alanine ligase activity | ribosomal S6-glutamic acid ligase activity | coenzyme F420-0 gamma-glutamyl ligase activity | coenzyme F420-2 alpha-glutamyl ligase activity	UBA-like | Ubiquitin system component Cue	6.3.2.-	Acid--D-amino-acid ligases (peptide synthases),		Tryptophan metabolism	Amino Acid Metabolism	CREB binding protein/P300 and related TAZ Zn-finger proteins	Transcription
10729	1446630	NO	9.55	9.17	0.37	1	9.65	9.22	0.43	1	0	0	0	0	0	0
3964	1479950	NO	7.86	7.48	0.38	1	8.08	7.03	1.05	1	0	0	0	0	0	0	metabolic process | methyltransferase activity	Methyltransferase type 11						SAM-dependent methyltransferases | SAM-dependent methyltransferases	Lipid transport and metabolism
10727	1444045	NO	9.22	9.09	0.13	1	9.63	9.03	0.6	1	0	0	0	0	0	0	RNA polymerase II transcription factor activity | transcription initiation from RNA polymerase II promoter | transcription factor TFIIA complex	Transcription factor IIA, helical | Transcription factor IIA, beta-barrel | Transcription factor IIA, alpha/beta subunit						RNA polymerase II transcription initiation factor TFIIA, large chain	Transcription
10726	1443915	NO	9.33	8.9	0.43	1	9.56	9.19	0.36	1	0	0	0	0	0	0		Src homology-3 | Protein of unknown function DUF500						Uncharacterized conserved protein	Function unknown
10725	1443800	NO	9.48	9.19	0.29	1	9.57	9.08	0.48	1	0	0	0	0	0	0	binding | transport | membrane	Mitochondrial substrate carrier						Mitochondrial solute carrier protein	Energy production and conversion
10724	1443642	NO	9.17	8.73	0.43	1	9.84	8.95	0.89	1	0	0	0	0	0	0
10723	1438652	NO	9.19	9.02	0.17	1	9.51	9.27	0.25	1	0	0	0	0	0	0
10722	1438156	NO	9.21	9.13	0.08	1	9.6	9.23	0.37	1	0	0	0	0	0	0	phosphoprotein phosphatase activity | calcium-dependent protein serine/threonine phosphatase activity | magnesium-dependent protein serine/threonine phosphatase activity | magnesium-dependent protein serine/threonine phosphatase complex | CTD phosphatase activity | calcium-dependent protein serine/threonine phosphatase regulator activity | myosin phosphatase activity | myosin phosphatase regulato…	Protein phosphatase 2C, N-terminal | Protein phosphatase 2C-related | Protein phosphatase 2C, manganese/magnesium aspartate binding site	3.1.3.16	Serine/threonine specific protein phosphatase,	A phosphoprotein + H(2)O = a protein + phosphate,			Serine/threonine protein phosphatase	Signal transduction mechanisms
10721	1438128	NO	9.3	9.02	0.28	1	9.72	8.99	0.74	1	0	0	0	0	0	0	endodeoxyribonuclease activity, producing 5'-phosphomonoesters	Deoxyribonuclease, TatD-related | Deoxyribonuclease, TatD Mg-dependent	3.1.21.-	Endodeoxyribonucleases producing 5'-phosphomonoesters,				TatD-related DNase	Replication, recombination and repair
10720	1413807	NO	9.47	8.89	0.58	1	9.57	9.02	0.55	1	0	0	0	0	0	0		Endonuclease/exonuclease/phosphatase
10719	1408140	NO	9.38	9.02	0.36	1	9.46	9.19	0.28	1	0	0	0	0	0	0	binding | catalytic activity | metabolic process | oxidoreductase activity | FAD binding | NADP binding | flavin-containing monooxygenase activity	NAD(P)-binding | Pyridine nucleotide-disulphide oxidoreductase, NAD-binding region | Flavin-containing monooxygenase FMO	1.14.13.8	Dimethylaniline monooxygenase (N-oxide forming),	N,N-dimethylaniline + NADPH + O(2) = N,N-dimethylaniline N-oxide + NADP(+) + H(2)O,			Flavin-containing monooxygenase	Secondary metabolites biosynthesis, transport and catabolism
10718	1044575	YES	9.41	9.08	0.33	1	9.6	9.12	0.48	1	0	0	0	0	0	0	proteolysis | pepsin A activity | aspartic-type endopeptidase activity | cathepsin E activity	Peptidase A1 | Peptidase aspartic, active site | Peptidase aspartic, catalytic	3.4.23.34	Cathepsin E,	Similar to cathepsin D, but slightly broader specificity,			Aspartyl protease	Posttranslational modification, protein turnover, chaperones
10717	724650	NO	9.79	9.22	0.58	1	9.53	9.48	0.06	1	0	0	0	0	0	0	actin binding	Gelsolin						von Willebrand factor and related coagulation proteins | von Willebrand factor and related coagulation proteins	Extracellular structures
10716	475566	NO	9.81	9.34	0.48	1	9.77	9.51	0.26	1	0	0	0	0	0	0
10715	169676	NO	9.66	9.23	0.43	1	9.61	9.32	0.29	1	0	0	0	0	0	0	exo-alpha-sialidase activity	CBF, N-terminal	3.2.1.18	Exo-alpha-sialidase,	Hydrolysis of alpha-(2->3)-, alpha-(2->6)-, alpha-(2->8)-glycosidic linkages of terminal sialic residues in oligosaccharides, glycoproteins, glycolipids, colominic acid and synthetic substrates,	N-Glycan degradation	Metabolism of Complex Carbohydrates	Nucleolar GTPase/ATPase p130	Nuclear structure
10714	1592980	YES	9.72	9.1	0.61	1	9.81	9.74	0.06	1	0	0	0	0	0	0		Immunoglobulin E-set | Glyoxal oxidase, N-terminal | Region of unknown function DUF1929 | Galactose oxidase/kelch, beta-propeller
10306	1576388	NO	8.33	7.17	1.15	1	8.83	7.81	1.02	1	0	0	0	0	0	0	protein tyrosine phosphatase activity | prenylated protein tyrosine phosphatase activity	Cellular retinaldehyde-binding/triple function, C-terminal | Cellular retinaldehyde-binding/triple function, N-terminal | Phosphatidylinositol transfer protein-like, N-terminal	3.1.3.48	Protein-tyrosine-phosphatase,	Protein tyrosine phosphate + H(2)O = protein tyrosine + phosphate,			Phosphatidylinositol transfer protein SEC14 and related proteins	Lipid transport and metabolism
10712	1553450	NO	9.86	9.26	0.6	1	9.81	9.57	0.24	1	0	0	0	0	0	0	nucleus | transcription regulator activity | regulation of transcription	WD40 repeat | WD40 repeat-like | WD40 associated region in TFIID subunit						Transcription initiation factor TFIID, subunit TAF5 (also component of histone acetyltransferase SAGA)	Transcription
10711	155003	NO	9.76	9.27	0.49	1	9.86	9.37	0.5	1	0	0	0	0	0	0	nucleic acid binding	RNA recognition motif, RNP-1						Protein Mei2, essential for commitment to meiosis, and related proteins	Cell cycle control, cell division, chromosome partitioning
10710	1542358	NO	9.87	9.26	0.61	1	9.94	9.4	0.54	1	0	0	0	0	0	0
10709	1508755	NO	9.85	9.17	0.68	1	9.78	9.62	0.16	1	0	0	0	0	0	0
10708	1507898	NO	9.86	9.34	0.52	1	9.68	9.49	0.2	1	0	0	0	0	0	0	copper ion binding	WD40 repeat-like | Multicopper oxidase, copper-binding site | IKI3						IkappaB kinase complex, IKAP component	Transcription
10707	1503589	NO	10.01	9.14	0.86	1	9.74	9.65	0.09	1	0	0	0	0	3	0	O-methyltransferase activity	O-methyltransferase, family 2						Hydroxyindole-O-methyltransferase and related SAM-dependent methyltransferases	General function prediction only
10706	1503024	NO	9.99	9.24	0.75	1	9.83	9.26	0.57	1	0	0	0	0	0	0	glucan 1,4-alpha-glucosidase activity		3.2.1.3	Glucan 1,4-alpha-glucosidase,	Hydrolysis of terminal 1,4-linked alpha-D-glucose residues successively from non-reducing ends of the chains with release of beta-D-glucose,	Starch and sucrose metabolism	Metabolism of Complex Carbohydrates	Splicing coactivator SRm160/300, subunit SRm300	RNA processing and modification
10705	1502647	NO	9.85	9.36	0.5	1	9.82	9.71	0.12	1	0	0	0	0	0	0
10704	1486160	NO	9.69	9.2	0.49	1	9.67	9.46	0.21	1	0	0	0	0	0	0	DNA binding	DNA-binding TFAR19-related protein						Apoptosis-related protein/predicted DNA-binding protein	Cell cycle control, cell division, chromosome partitioning
10703	1484067	NO	9.85	9.22	0.63	1	9.6	9.47	0.13	1	0	0	0	0	0	0	transport | transporter activity | integral to membrane	MFS general substrate transporter | Major facilitator superfamily MFS-1 | Major facilitator superfamily						Predicted transporter (major facilitator superfamily)	General function prediction only
10702	1483548	NO	9.69	9.23	0.46	1	9.72	9.62	0.1	1	0	0	0	0	0	0	protein folding | peptidyl-prolyl cis-trans isomerase activity | cyclophilin | FK506-sensitive peptidyl-prolyl cis-trans isomerase | cyclophilin-type peptidyl-prolyl cis-trans isomerase activity	WD40 repeat | WD40 repeat-like | Peptidyl-prolyl cis-trans isomerase, cyclophilin-type | Cyclophilin-like	5.2.1.8	Peptidylprolyl isomerase,	Peptidylproline (omega=180) = peptidylproline (omega=0),			Cyclophilin-related peptidyl-prolyl cis-trans isomerase	Posttranslational modification, protein turnover, chaperones
10701	1480117	NO	9.65	8.98	0.67	1	9.59	9.46	0.13	1	0	0	0	0	0	0	RNA binding | tRNA-pseudouridine synthase activity | tRNA pseudouridine synthesis | pseudouridylate synthase activity	tRNA pseudouridine synthase B, N-terminal | tRNA pseudouridine synthase B, N-terminal, bacterial-type	4.2.1.70	Pseudouridylate synthase,	Uracil + D-ribose 5-phosphate = pseudouridine 5'-phosphate + H(2)O,	Pyrimidine metabolism	Nucleotide Metabolism	Pseudouridine synthase	Translation, ribosomal structure and biogenesis
10700	1479098	NO	9.58	9.42	0.17	1	9.87	9.41	0.46	1	0	0	0	0	0	0	catalytic activity | metal ion binding | iron-sulfur cluster binding | 4 iron, 4 sulfur cluster binding | Mo-molybdopterin cofactor biosynthetic process | molybdopterin synthase complex	Radical SAM | Elongator protein 3/MiaB/NifB | Molybdopterin cofactor biosynthesis MoaC region | Molybdenum cofactor synthesis C-terminal | Molybdenum cofactor biosynthesis protein A | MoaA/nifB/pqqE, iron-sulphur binding, conserved site						Molybdenum cofactor biosynthesis pathway protein	Coenzyme transport and metabolism
10699	1464640	NO	9.7	9.3	0.4	1	9.95	9.66	0.29	1	0	0	0	0	0	0	membrane | intracellular protein transport	Target SNARE coiled-coil region | Vesicle transport v-SNARE						V-SNARE	Intracellular trafficking, secretion, and vesicular transport
10698	1458347	NO	9.73	9.33	0.4	1	9.73	9.33	0.4	1	0	0	0	0	4	0	FMN binding	FMN-binding split barrel, related | Pyridoxamine 5'-phosphate oxidase-related, FMN-binding core
10697	1458070	NO	9.73	9.41	0.32	1	9.69	9.31	0.38	1	0	0	0	0	0	0	membrane | proteolysis | peptidase activity | serine-type peptidase activity | signal peptide processing | signal peptidase I activity	Peptidase S26A, signal peptidase I | Peptidase S26B, eukaryotic signal peptidase | Peptidase S24, S26A and S26B, C-terminal | Peptidase S24, S26A, S26B and S26C	3.4.21.89	Signal peptidase I,	Cleavage of N-terminal leader sequences from secreted and periplasmic proteins precursor,	Protein export	SORTING AND DEGRADATION	Signal peptidase I	Intracellular trafficking, secretion, and vesicular transport
10696	1456756	NO	9.6	9.4	0.2	1	9.79	9.39	0.4	1	0	0	0	0	0	0		WD40 repeat | WD40 repeat-like						WD40 repeat protein	General function prediction only
10695	1456435	NO	9.86	9.48	0.38	1	9.58	9.35	0.23	1	0	0	0	0	0	0	ATP binding | protein kinase activity | protein amino acid phosphorylation | protein-tyrosine kinase activity | protein serine/threonine kinase activity	Protein kinase ATP binding, conserved site | Protein kinase-like | Protein kinase, core | Serine/threonine protein kinase-related | Tyrosine protein kinase | Serine/threonine protein kinase | Serine/threonine protein kinase, active site	2.7.1.37	Protein kinase,	ATP + a protein = ADP + a phosphoprotein,			NDR and related serine/threonine kinases	General function prediction only
10694	1453884	NO	9.7	9.3	0.4	1	9.7	9.22	0.49	1	0	0	0	0	0	0
10693	1449087	NO	9.83	9.33	0.5	1	9.6	9.46	0.14	1	0	0	0	0	0	0	catalytic activity | protein modification process | biotin-[acetyl-CoA-carboxylase] ligase activity	Biotin/lipoate A/B protein ligase | Biotin--acetyl-CoA-carboxylase ligase						Biotin holocarboxylase synthetase/biotin-protein ligase	Coenzyme transport and metabolism
10692	1443846	NO	9.8	9.27	0.53	1	9.71	9.54	0.17	1	0	0	0	0	0	0	ATP binding | phosphatidylinositol phosphate kinase activity | protein kinase activity | protein amino acid phosphorylation | protein-tyrosine kinase activity | protein serine/threonine kinase activity | phosphofructokinase activity | phosphorylase kinase regulator activity | cobinamide kinase activity | cyclin-dependent protein kinase regulator activity | phenol kinase activity | cyclin-dependen…	Protein kinase ATP binding, conserved site | Protein kinase-like | Protein kinase, core | Serine/threonine protein kinase-related | Tyrosine protein kinase | Serine/threonine protein kinase | Serine/threonine protein kinase, active site | Inositol monophosphatase	2.7.1.-	Phosphotransferases with an alcohol group as acceptor,		Sphingoglycolipid metabolism	Metabolism of Complex Lipids	MAPKKK (MAP kinase kinase kinase) SSK2 and related serine/threonine protein kinases	Signal transduction mechanisms
10691	1443840	NO	9.7	9.34	0.36	1	9.8	9.39	0.41	1	0	0	0	0	0	0		WD40 repeat-like | Quinoprotein amine dehydrogenase, beta chain-like | Protein of unknown function DUF1339						WD40 repeat protein	General function prediction only
10690	1443028	NO	9.68	9.16	0.52	1	9.83	9.68	0.15	1	0	0	0	0	0	0	transport | membrane | nucleoside transmembrane transporter activity	MFS general substrate transporter | Delayed-early response protein/equilibrative nucleoside transporter						Nucleoside transporter	Nucleotide transport and metabolism
10689	1440135	NO	9.6	9.09	0.51	1	9.92	9.78	0.14	1	0	0	0	0	0	0	catalytic activity | aromatic compound metabolic process | ferric iron binding | iron ion binding | oxidoreductase activity, acting on single donors with incorporation of molecular oxygen, incorporation of two atoms of oxygen | catechol metabolic process | catechol 1,2-dioxygenase activity | hydroxyquinol 1,2-dioxygenase activity	Intradiol ring-cleavage dioxygenase, C-terminal | Intradiol ring-cleavage dioxygenase, core | Catechol dioxygenase, N-terminal	1.13.11.37	Hydroxyquinol 1,2-dioxygenase,	Benzene-1,2,4-triol + O(2) = 3-hydroxy-cis,cis-muconate,	Benzoate degradation via hydroxylation	Biodegradation of Xenobiotics
10688	1438376	YES	9.87	9.26	0.61	1	9.62	9.45	0.17	1	0	0	0	0	0	0		Region of unknown function DUF1793						CREB binding protein/P300 and related TAZ Zn-finger proteins	Transcription
10687	1434413	NO	9.83	9.16	0.67	1	9.72	9.71	0	1	0	0	0	0	0	0	membrane | ATP binding | regulation of transcription, DNA-dependent | signal transduction | signal transducer activity | phosphorylation | transferase activity, transferring phosphorus-containing groups | two-component response regulator activity | two-component signal transduction system (phosphorelay) | two-component sensor activity | protein histidine kinase activity | peptidyl-histidine phosp…	ATP-binding region, ATPase-like | CheY-like | Signal transduction response regulator, receiver region | Signal transduction histidine kinase-related protein, C-terminal | Signal transduction histidine kinase, core | Signal transduction histidine kinase, subgroup 1, dimerisation and phosphoacceptor region | Signal transduction histidine kinase, homodimeric	2.7.3.-	Phosphotransferases with a nitrogenous group as acceptor,		Type II secretion system	SORTING AND DEGRADATION	Sensory transduction histidine kinase	Signal transduction mechanisms
10686	1434242	NO	9.78	9.19	0.58	1	9.38	9.64	-0.26	1	0	0	0	0	0	0								RNA helicase	RNA processing and modification
10685	1386406	NO	9.71	9.19	0.52	1	9.6	9.48	0.12	1	0	0	0	0	0	0	intracellular | nucleic acid binding | nucleobase, nucleoside, nucleotide and nucleic acid metabolic process | 3'-5' exonuclease activity	Polynucleotidyl transferase, Ribonuclease H fold | 3'-5' exonuclease						Predicted 3'-5' exonuclease	General function prediction only
10684	1385920	NO	9.68	9.16	0.52	1	9.73	9.47	0.25	1	0	0	0	0	0	0	intracellular | transcription factor activity | regulation of transcription, DNA-dependent | sequence-specific DNA binding	Pre-mRNA processing ribonucleoprotein, binding region | NOSIC | Helix-turn-helix, AraC type						mRNA splicing factor PRP31	RNA processing and modification
10683	1382191	NO	9.67	9.1	0.57	1	9.58	9.54	0.05	1	0	0	0	0	0	0		Cystinosin/ERS1p repeat						Predicted membrane protein	Function unknown
10682	1380481	NO	9.83	9.11	0.72	1	9.83	9.32	0.51	1	0	0	0	0	0	0	protein binding | metabolic process | acyltransferase activity | dihydrolipoyllysine-residue acetyltransferase activity | dihydrolipoamide S-acyltransferase complex | dihydrolipoamide S-acyltransferase activity	Biotin/lipoyl attachment | Single hybrid motif | 2-oxo acid dehydrogenase, lipoyl-binding site | E3 binding	2.3.1.12	Dihydrolipoamide S-acetyltransferase,	Acetyl-CoA + dihydrolipoamide = CoA + S-acetyldihydrolipoamide,	Glycolysis / Gluconeogenesis	Carbohydrate Metabolism	Dihydrolipoamide acetyltransferase	Energy production and conversion
10681	1258591	NO	9.72	9.17	0.55	1	9.8	9.52	0.28	1	0	0	0	0	0	0	membrane | transporter activity | integral to membrane | sodium ion transport | citrate transmembrane transporter activity | citrate transport	Nucleic acid-binding, OB-fold-like | SPX, N-terminal | Divalent ion symporter | Sodium/sulphate symporter						Na+/dicarboxylate, Na+/tricarboxylate and phosphate transporters	Inorganic ion transport and metabolism
10680	1135302	YES	9.72	9.36	0.36	1	9.9	9.67	0.23	1	0	0	0	0	0	0
10679	1108350	NO	9.75	9.45	0.31	1	9.84	9.39	0.45	1	0	0	0	0	0	0	protein binding | adenylate cyclase activity | calcium- and calmodulin-responsive adenylate cyclase activity	Leucine-rich repeat | Leucine-rich repeat, typical subtype	4.6.1.1	Adenylate cyclase,	ATP = 3',5'-cyclic AMP + diphosphate,	Purine metabolism	Nucleotide Metabolism	Leucine-rich repeat protein	Function unknown
10678	882804	NO	10.33	9.49	0.84	1	10.22	9.72	0.5	1	0	0	0	0	0	0	intracellular | Rho guanyl-nucleotide exchange factor activity | regulation of Rho protein signal transduction | glucan 1,4-alpha-glucosidase activity	Dbl homology (DH) domain	3.2.1.3	Glucan 1,4-alpha-glucosidase,	Hydrolysis of terminal 1,4-linked alpha-D-glucose residues successively from non-reducing ends of the chains with release of beta-D-glucose,	Starch and sucrose metabolism	Metabolism of Complex Carbohydrates	Invasion-inducing protein TIAM1/CDC24 and related RhoGEF GTPases	Signal transduction mechanisms
10677	783186	NO	9.73	9.56	0.18	1	10.35	9.69	0.66	1	0	0	0	0	0	0
10676	666214	NO	10.07	9.42	0.65	1	10.13	9.5	0.63	1	0	0	0	0	0	0	catalytic activity | metabolic process	AMP-dependent synthetase and ligase						von Willebrand factor and related coagulation proteins | von Willebrand factor and related coagulation proteins	Extracellular structures
10675	519878	NO	10.01	9.35	0.65	1	9.89	9.76	0.13	1	0	0	0	0	0	0		Proteasome/cyclosome, regulatory subunit						Anaphase-promoting complex (APC), subunit 1 (meiotic check point regulator/Tsg24) | Anaphase-promoting complex (APC), subunit 1 (meiotic check point regulator/Tsg24)	Cell cycle control, cell division, chromosome partitioning
10674	230735	NO	9.87	9.59	0.28	1	10.04	9.79	0.25	1	0	0	0	0	0	0	ATP binding | protein kinase activity | protein amino acid phosphorylation | protein-tyrosine kinase activity | protein serine/threonine kinase activity | calmodulin-dependent protein kinase activity	Protein kinase-like | Protein kinase, core | Serine/threonine protein kinase-related | Tyrosine protein kinase | Serine/threonine protein kinase | Serine/threonine protein kinase, active site						Ca2+/calmodulin-dependent protein kinase, EF-Hand protein superfamily	Signal transduction mechanisms
10673	1592791	NO	9.86	9.49	0.37	1	10.02	9.49	0.52	1	0	0	0	0	0	0		N1221-like						Uncharacterized conserved protein	Function unknown
10672	1591191	NO	9.94	9.34	0.6	1	9.97	9.77	0.21	1	0	0	0	0	0	0
10671	1588274	NO	10.05	9.43	0.62	1	10.11	9.7	0.4	1	0	0	0	0	0	0	glucan 1,4-alpha-glucosidase activity		3.2.1.3	Glucan 1,4-alpha-glucosidase,	Hydrolysis of terminal 1,4-linked alpha-D-glucose residues successively from non-reducing ends of the chains with release of beta-D-glucose,	Starch and sucrose metabolism	Metabolism of Complex Carbohydrates	Putative transcription factor HALR/MLL3, involved in embryonic development	General function prediction only
10670	1586898	NO	9.95	9.41	0.53	1	10.25	9.67	0.58	1	0	0	0	0	0	0	membrane | calcium ion binding	Like-Sm ribonucleoprotein-related, core | Calcium-binding EF-hand | Mechanosensitive ion channel MscS						Predicted mechanosensitive ion channel	Cell wall/membrane/envelope biogenesis
10669	1542717	NO	10.19	9.42	0.77	1	9.94	9.62	0.31	1	0	0	0	0	0	0
10668	1512467	NO	10.22	9.48	0.74	1	10.08	9.8	0.28	1	0	0	0	0	0	0	glucan 1,4-alpha-glucosidase activity	Cupredoxin	3.2.1.3	Glucan 1,4-alpha-glucosidase,	Hydrolysis of terminal 1,4-linked alpha-D-glucose residues successively from non-reducing ends of the chains with release of beta-D-glucose,	Starch and sucrose metabolism	Metabolism of Complex Carbohydrates	WD40 repeat protein	General function prediction only
10667	1491199	NO	9.98	9.49	0.49	1	10.08	9.57	0.51	1	0	0	0	0	0	0	binding	Armadillo-type fold						Uncharacterized conserved protein	Function unknown
10666	1486769	NO	10.02	9.56	0.47	1	9.85	9.77	0.08	1	0	0	0	0	0	0
10665	1486138	NO	9.81	9.56	0.25	1	10.25	9.58	0.67	1	0	0	0	0	0	0								Serine/threonine protein kinase	Signal transduction mechanisms
10664	1484433	NO	10.24	9.53	0.72	1	9.94	9.67	0.27	1	0	0	0	0	0	0	hydrolase activity, hydrolyzing O-glycosyl compounds | carbohydrate metabolic process | beta-mannosidase activity	Glycoside hydrolase, catalytic core | Galactose-binding like | Glycoside hydrolase family 2, immunoglobulin-like beta-sandwich	3.2.1.25	Beta-mannosidase,	Hydrolysis of terminal, non-reducing beta-D-mannose residues in beta-D-mannosides,	N-Glycan degradation	Metabolism of Complex Carbohydrates	Predicted beta-mannosidase	Carbohydrate transport and metabolism
10663	1476599	NO	10.05	9.32	0.73	1	10.14	9.58	0.55	1	0	0	0	0	0	0	catalytic activity | carbohydrate binding | carbohydrate catabolic process	Cytochrome b561 / ferric reductase transmembrane | Carbohydrate-binding family 9/cellobiose dehydrogenase, cytochrome						Predicted membrane protein, contains DoH and Cytochrome b-561/ferric reductase transmembrane domains	Signal transduction mechanisms
10662	1461531	NO	9.95	9.63	0.31	1	10.14	9.66	0.48	1	0	0	2	0	4	0	histidine biosynthetic process | imidazoleglycerol-phosphate dehydratase activity	Imidazole glycerol-phosphate dehydratase	4.2.1.19	Imidazoleglycerol-phosphate dehydratase,	D-erythro-1-(imidazol-4-yl)glycerol 3-phosphate = 3-(imidazol-4-yl)- 2-oxopropyl phosphate + H(2)O,	Histidine metabolism	Amino Acid Metabolism	Imidazoleglycerol-phosphate dehydratase	Amino acid transport and metabolism
10661	1456561	NO	9.75	9.5	0.25	1	10	9.51	0.49	1	0	0	0	0	0	0	magnesium ion binding | phosphopantetheinyltransferase activity | macromolecule biosynthetic process	4'-phosphopantetheinyl transferase
10660	1453905	NO	10.05	9.4	0.65	1	10.27	9.8	0.47	1	0	0	0	0	0	0	intracellular | Rab GTPase activator activity | regulation of Rab GTPase activity	RabGAP/TBC						Rab6 GTPase activator GAPCenA and related TBC domain proteins	General function prediction only
10659	1451665	NO	10.37	9.67	0.7	1	10.16	9.61	0.55	1	0	0	0	0	0	0	ATP binding | ATPase activity | nucleotide binding | nucleoside-triphosphatase activity	Concanavalin A-like lectin/glucanase | AAA+ ATPase, core | EGF-like region, conserved site | ABC transporter-like | ABC-2 type transporter | EGF, extracellular						Transporter, ABC superfamily (Breast cancer resistance protein)	Secondary metabolites biosynthesis, transport and catabolism
10658	1449005	NO	10.15	9.57	0.58	1	10.02	9.74	0.28	1	0	0	0	0	0	0		Glycosyltransferase sugar-binding region containing DXD motif
10657	1446950	NO	10.05	9.72	0.33	1	10.41	9.66	0.76	1	0	0	0	0	0	0	binding | catalytic activity | metabolic process | alcohol dehydrogenase activity | alcohol dehydrogenase activity, metal ion-independent | alcohol dehydrogenase activity, zinc-dependent | alcohol dehydrogenase activity, iron-dependent	NAD(P)-binding | Alcohol dehydrogenase, zinc-binding | Alcohol dehydrogenase GroES-like | GroES-like	1.1.1.1	Alcohol dehydrogenase,	An alcohol + NAD(+) = an aldehyde or ketone + NADH,	Bile acid biosynthesis	Lipid Metabolism	Zinc-binding oxidoreductase | Zinc-binding oxidoreductase	Energy production and conversion
10656	1446930	NO	9.93	9.68	0.25	1	9.97	9.84	0.13	1	0	0	0	0	0	0	DNA-directed DNA polymerase activity | DNA polymerase activity		2.7.7.7	DNA-directed DNA polymerase,	N deoxynucleoside triphosphate = N diphosphate + {DNA}(N),	Purine metabolism	Nucleotide Metabolism	Splicing coactivator SRm160/300, subunit SRm160 (contains PWI domain) | Splicing coactivator SRm160/300, subunit SRm160 (contains PWI domain)	RNA processing and modification
10655	1446746	NO	9.91	9.6	0.32	1	10.08	9.64	0.44	1	0	0	0	0	0	0	ATP binding | protein kinase activity | protein amino acid phosphorylation | protein-tyrosine kinase activity | protein serine/threonine kinase activity	Protein kinase-like | Protein kinase, core | Serine/threonine protein kinase-related | Tyrosine protein kinase | Serine/threonine protein kinase						Tyrosine kinase specific for activated (GTP-bound) p21cdc42Hs	Signal transduction mechanisms
10654	1444997	NO	9.98	9.64	0.33	1	9.99	9.69	0.3	1	0	0	0	0	0	0		WD40 repeat | WD40 repeat-like						Conserved WD40 repeat-containing protein AN11	Function unknown
10653	1443799	NO	9.97	9.51	0.46	1	9.88	9.56	0.32	1	0	0	0	0	0	0		NPL4, zinc-binding putative | NPL4 | Polyubiquitin-tagged protein recognition complex, Npl4 component						Nuclear pore complex, rNpl4 component (sc Npl4) | Nuclear pore complex, rNpl4 component (sc Npl4)	Nuclear structure
10652	1443363	NO	9.89	9.52	0.37	1	10.04	9.8	0.24	1	0	0	0	0	0	0		C2 calcium-dependent membrane targeting | C2 calcium/lipid-binding region, CaLB						Serine/threonine protein kinase	Signal transduction mechanisms
10651	1443325	NO	9.85	9.64	0.21	1	10.06	9.68	0.38	1	0	0	0	0	0	0		PI31 proteasome regulator						Proteasome formation inhibitor PI31	Posttranslational modification, protein turnover, chaperones
10650	1443306	NO	10.02	9.7	0.32	1	9.95	9.69	0.26	1	0	0	0	0	0	0	ATP binding | protein amino acid phosphorylation | protein-tyrosine kinase activity	Protein kinase-like | Tyrosine protein kinase, active site
10649	1442543	NO	9.91	9.68	0.22	1	9.98	9.68	0.31	1	0	0	0	0	0	0	zinc ion binding | nucleus | transcription factor activity | regulation of transcription, DNA-dependent | DNA binding | transcription	Fungal transcriptional regulatory protein, N-terminal | Fungal specific transcription factor
10648	1442138	NO	10.11	9.56	0.55	1	10.09	9.51	0.58	1	0	0	0	0	0	0	zinc ion binding | nucleic acid binding	Zinc finger, CCCH-type | Smr protein/MutS2 C-terminal | Region of unknown function DUF1771						Polyadenylation factor I complex, subunit, Yth1 (CPSF subunit)	RNA processing and modification
10647	1440077	NO	9.91	9.3	0.61	1	9.9	9.7	0.2	1	0	0	0	0	0	0	protein amino acid dephosphorylation | protein tyrosine/serine/threonine phosphatase activity | dephosphorylation | phosphoric monoester hydrolase activity	Protein-tyrosine phosphatase, dual specificity | Protein-tyrosine phosphatase						Dual specificity phosphatase	Defense mechanisms
10646	1439699	NO	10.04	9.69	0.35	1	10.1	9.87	0.23	1	0	0	0	0	0	0								Uncharacterized conserved protein	Function unknown
10645	1439654	NO	9.93	9.58	0.35	1	10.15	9.92	0.23	1	0	0	0	0	0	0	dolichyl-phosphate beta-D-mannosyltransferase activity	Glycosyl transferase, family 2	2.4.1.83	Dolichyl-phosphate beta-D-mannosyltransferase,	GDP-mannose + dolichyl phosphate = GDP + dolichyl D-mannosyl phosphate,	N-Glycans biosynthesis	Metabolism of Complex Carbohydrates	Dolichol-phosphate mannosyltransferase	General function prediction only
10644	1411026	NO	10.16	9.4	0.76	1	10.24	9.7	0.55	1	0	0	0	0	0	0	ATP binding | glycerone kinase activity | glycerol metabolic process	Dak kinase | Dak phosphatase | Dihydroxyacetone kinase	2.7.1.29	Glycerone kinase,	ATP + glycerone = ADP + glycerone phosphate,	Glycerolipid metabolism	Metabolism of Complex Lipids	Dihydroxyacetone kinase/glycerone kinase	Carbohydrate transport and metabolism
10643	1390994	NO	9.9	9.46	0.44	1	9.98	9.64	0.34	1	0	0	0	0	0	0	GTP binding | GTPase activity | translation | protein-synthesizing GTPase activity	Protein synthesis factor, GTP-binding | Translation elongation factor EFTu/EF1A, domain 2 | Translation elongation and initiation factors/Ribosomal, beta-barrel | Translation elongation factor EF1A/initiation factor IF2gamma, C-terminal						Elongation factor 1 alpha	Translation, ribosomal structure and biogenesis
10642	1382179	NO	10.09	9.45	0.64	1	10.07	9.7	0.37	1	0	0	0	0	0	0		HSP20-like chaperone | CS domain | SHQ1 protein | CS						Uncharacterized conserved protein	Function unknown
10641	925459	NO	10.25	9.65	0.6	1	10.6	9.81	0.79	1	0	0	0	0	0	0		Der1-like						Predicted membrane protein	Function unknown
10640	82594	NO	10.36	9.81	0.55	1	10.38	9.79	0.6	1	0	0	0	0	0	0	catalytic activity	Spermine synthase
10639	646245	NO	10.15	9.66	0.5	1	10.44	10.18	0.27	1	0	0	0	0	0	0
10638	571053	NO	10.31	9.63	0.68	1	10.3	10.14	0.16	1	0	0	0	0	0	0								Fry-like conserved proteins	General function prediction only
10637	489980	NO	10.33	9.71	0.62	1	10.76	9.95	0.81	1	0	0	0	0	0	0
10636	393517	NO	10.28	9.68	0.6	1	10.68	9.84	0.84	1	0	0	0	0	0	0	glucan 1,4-alpha-glucosidase activity		3.2.1.3	Glucan 1,4-alpha-glucosidase,	Hydrolysis of terminal 1,4-linked alpha-D-glucose residues successively from non-reducing ends of the chains with release of beta-D-glucose,	Starch and sucrose metabolism	Metabolism of Complex Carbohydrates	beta-1,6-N-acetylglucosaminyltransferase, contains WSC domain | beta-1,6-N-acetylglucosaminyltransferase, contains WSC domain	Carbohydrate transport and metabolism
10635	388886	NO	10.44	9.92	0.52	1	10.35	9.77	0.57	1	0	0	0	0	0	0
10634	1585641	NO	10.16	9.9	0.26	1	10.48	9.67	0.81	1	0	0	0	0	0	0
10633	1502901	NO	10.52	9.75	0.77	1	10.19	10.15	0.04	1	0	0	9	0	12	0	hydrolase activity | proteolysis | metallopeptidase activity | protein dimerization activity | Gly-X carboxypeptidase activity	ArgE/DapE/ACY1/CPG2/YscS, conserved site | Peptidase M20 | Peptidase M20, dimerisation | Peptidase M20, carboxypeptidase S	3.4.17.4	Gly-X carboxypeptidase,	Peptidylglycine + H(2)O = peptide + glycine,			Aminoacylase ACY1 and related metalloexopeptidases	Amino acid transport and metabolism
10632	1502015	YES	10.25	9.84	0.41	1	10.66	10.1	0.56	1	0	0	0	0	0	0	nucleus | DNA binding | nucleosome | nucleosome assembly	Histone H1/H5						Histone H1	Chromatin structure and dynamics
10824	1457183	NO	8.72	7.44	1.27	1	9.07	8.06	1.01	1	0	0	0	0	0	0		C2 calcium-dependent membrane targeting | C2 calcium/lipid-binding region, CaLB						Phosphatidylserine decarboxylase	Lipid transport and metabolism
10630	1481555	NO	10.58	9.79	0.79	1	10.19	9.9	0.29	1	0	0	0	0	0	0	cell redox homeostasis | protein disulfide isomerase activity	Thioredoxin-related | Thioredoxin domain | Thioredoxin-like fold	5.3.4.1	Protein disulfide isomerase,	Rearrangement of both intrachain and interchain disulfide bonds in proteins to form the native structures,			Thioredoxin/protein disulfide isomerase	Posttranslational modification, protein turnover, chaperones
10629	1464036	NO	10.5	9.72	0.78	1	10.37	9.64	0.73	1	0	0	0	0	0	0
10628	1456729	NO	10.4	9.5	0.9	1	10.14	10.18	-0.04	1	0	0	0	0	0	0	transport | ATP binding | ATPase activity | ATPase activity, coupled to transmembrane movement of substances | integral to membrane | nucleotide binding | nucleoside-triphosphatase activity	AAA+ ATPase, core | ABC transporter-like | ABC transporter, transmembrane region, type 1 | ABC transporter, transmembrane region						Multidrug resistance-associated protein/mitoxantrone resistance protein, ABC superfamily	Secondary metabolites biosynthesis, transport and catabolism
10627	1456315	NO	10.42	9.57	0.85	1	10.52	10.12	0.4	1	0	0	0	0	0	0	transaminase activity | pyridoxal phosphate binding | adenosylmethionine-8-amino-7-oxononanoate transaminase activity	Aminotransferase class-III | Pyridoxal phosphate-dependent transferase, major region	2.6.1.62	Adenosylmethionine--8-amino-7-oxononanoate aminotransferase,	S-adenosyl-L-methionine + 8-amino-7-oxononanoate = S-adenosyl-4- methylthio-2-oxobutanoate + 7,8-diaminononanoate,	Biotin metabolism	Metabolism of Cofactors and Vitamins	Alanine-glyoxylate aminotransferase AGT2	Amino acid transport and metabolism
10626	1454854	NO	10.35	9.65	0.69	1	10.65	9.89	0.76	1	0	0	0	0	0	0	membrane	Protein of unknown function UPF0136, Transmembrane						Predicted membrane protein	Function unknown
10625	1454394	NO	10.42	9.81	0.6	1	10.42	10.06	0.35	1	0	0	0	0	0	0								Chitinase	Cell wall/membrane/envelope biogenesis
10624	1452084	NO	10.2	9.94	0.26	1	10.5	9.8	0.7	1	0	0	0	0	0	0
10623	1449727	YES	10.43	9.76	0.67	1	10.14	9.96	0.18	1	23	8	22	15	17	15	oxidoreductase activity | copper ion binding | laccase activity	Cupredoxin | Multicopper oxidase, type 1 | Multicopper oxidase, type 2 | Multicopper oxidase, type 3 | Multicopper oxidase, copper-binding site	1.10.3.2	Laccase,	4 benzenediol + O(2) = 4 benzosemiquinone + 2 H(2)O,			Multicopper oxidases	Secondary metabolites biosynthesis, transport and catabolism
10622	1449712	NO	10.25	9.34	0.91	1	10.46	9.76	0.7	1	0	0	0	0	0	0	integral to membrane	CD9/CD37/CD63 antigen
10621	1448844	NO	10.65	9.73	0.93	1	10.23	9.91	0.31	1	0	0	0	0	0	0	integral to membrane | rhodopsin-like receptor activity | G-protein coupled receptor protein signaling pathway	GPCR, rhodopsin-like
10620	1445594	NO	10.47	9.75	0.71	1	10.49	10	0.49	1	0	0	0	0	0	0	binding | transport | membrane	Mitochondrial substrate carrier
10619	1445291	NO	10.5	9.55	0.94	1	10.24	9.79	0.45	1	0	0	0	0	0	0	ATP binding | phosphatidylinositol phosphate kinase activity | protein kinase activity | protein amino acid phosphorylation | protein-tyrosine kinase activity | protein serine/threonine kinase activity | intracellular signaling cascade | phosphofructokinase activity | phosphorylase kinase regulator activity | cobinamide kinase activity | cyclin-dependent protein kinase regulator activity | phenol…	Protein kinase ATP binding, conserved site | Protein kinase-like | Protein kinase, core | Serine/threonine protein kinase-related | Tyrosine protein kinase | Serine/threonine protein kinase | Serine/threonine protein kinase, active site | Protein kinase C, phorbol ester/diacylglycerol binding | Calponin-homology | SM22/calponin | Calponin-like actin-binding	2.7.1.-	Phosphotransferases with an alcohol group as acceptor,		Sphingoglycolipid metabolism	Metabolism of Complex Lipids	MEKK and related serine/threonine protein kinases	Signal transduction mechanisms
10618	1444588	NO	10.28	9.52	0.76	1	10.24	9.89	0.35	1	0	0	0	0	0	0	riboflavin biosynthetic process | riboflavin synthase activity | riboflavin synthase complex	6,7-dimethyl-8-ribityllumazine synthase	2.5.1.9	Riboflavin synthase,	2 6,7-dimethyl-8-(1-D-ribityl)lumazine = riboflavin + 4-(1-D- ribitylamino)-5-amino-2,6-dihydroxypyrimidine,	Riboflavin metabolism	Metabolism of Cofactors and Vitamins	6,7-dimethyl-8-ribityllumazine synthase	Coenzyme transport and metabolism
10617	1443780	NO	10.4	9.74	0.66	1	10.34	9.89	0.46	1	0	0	0	0	0	0	ATP binding | protein kinase activity | protein amino acid phosphorylation | protein serine/threonine kinase activity	Protein kinase ATP binding, conserved site | Protein kinase-like | Protein kinase, core | Serine/threonine protein kinase-related | Serine/threonine protein kinase | Serine/threonine protein kinase, active site	2.7.1.37	Protein kinase,	ATP + a protein = ADP + a phosphoprotein,			Serine/threonine protein kinase	Signal transduction mechanisms
10616	1443647	NO	10.24	9.64	0.61	1	10.43	9.83	0.6	1	0	0	0	0	0	0	inositol-polyphosphate 5-phosphatase activity | inositol or phosphatidylinositol phosphatase activity	WD40 repeat | WD40 repeat-like | Endonuclease/exonuclease/phosphatase | Inositol polyphosphate related phosphatase	3.1.3.56	Inositol-1,4,5-trisphosphate 5-phosphatase,	D-myo-inositol 1,4,5-trisphosphate + H(2)O = D-myo-inositol 1,4-bisphosphate + phosphate,	Inositol phosphate metabolism	Metabolism of Complex Lipids	Inositol polyphosphate 5-phosphatase and related proteins	Intracellular trafficking, secretion, and vesicular transport
10615	1442629	NO	10.49	9.28	1.2	1	10.55	10.15	0.4	1	0	0	0	0	0	0	binding | ATP binding | phosphatidylinositol phosphate kinase activity | protein kinase activity | protein amino acid phosphorylation | protein-tyrosine kinase activity | protein serine/threonine kinase activity | phosphofructokinase activity | phosphorylase kinase regulator activity | cobinamide kinase activity | cyclin-dependent protein kinase regulator activity | phenol kinase activity | cycli…	Protein kinase ATP binding, conserved site | Protein kinase-like | Protein kinase, core | Serine/threonine protein kinase-related | Tyrosine protein kinase | Serine/threonine protein kinase | Serine/threonine protein kinase, active site | Armadillo-type fold	2.7.1.-	Phosphotransferases with an alcohol group as acceptor,		Sphingoglycolipid metabolism	Metabolism of Complex Lipids	MEKK and related serine/threonine protein kinases	Signal transduction mechanisms
10614	1441837	NO	10.35	9.73	0.62	1	10.5	10.17	0.33	1	0	0	0	0	0	0	protein binding | zinc ion binding	Zinc finger, RING-type | Zinc finger, C6HC-type						Predicted E3 ubiquitin ligase	Posttranslational modification, protein turnover, chaperones
8968	1521594	NO	11.05	11.35	-0.3	1	11.26	10.25	1.01	1	0	0	6	0	5	0	catalytic activity | metabolic process	Crotonase, core						Hydroxyacyl-CoA dehydrogenase/enoyl-CoA hydratase	Lipid transport and metabolism
8298	1444451	NO	7.26	6.56	0.69	1	7.36	6.37	0.99	1	0	0	0	0	0	0	protein tyrosine phosphatase activity | prenylated protein tyrosine phosphatase activity	Cellular retinaldehyde-binding/triple function, C-terminal | Cellular retinaldehyde-binding/triple function, N-terminal | Phosphatidylinositol transfer protein-like, N-terminal	3.1.3.48	Protein-tyrosine-phosphatase,	Protein tyrosine phosphate + H(2)O = protein tyrosine + phosphate,			Phosphatidylinositol transfer protein SEC14 and related proteins	Lipid transport and metabolism
10611	1439810	NO	10.39	9.85	0.54	1	10.7	9.97	0.73	1	0	0	0	0	0	0		Cupin, RmlC-type | Pirin, N-terminal | Pirin, C-terminal
10610	1439414	NO	10.36	9.83	0.52	1	10.5	10.18	0.32	1	0	0	0	0	0	0	intracellular | nucleic acid binding | ubiquitin-dependent protein catabolic process | poly(A)-specific ribonuclease activity | exonuclease activity | ubiquitin thiolesterase activity	Polynucleotidyl transferase, Ribonuclease H fold | WD40 repeat-like | Exonuclease, RNase T and DNA polymerase III | Exonuclease | Peptidase C19, ubiquitin carboxyl-terminal hydrolase 2	3.1.13.4	Poly(A)-specific ribonuclease,	Exonucleolytic cleavage of poly(A) to 5'-AMP,			PAB-dependent poly(A) ribonuclease, subunit PAN2	Replication, recombination and repair
10609	1438019	NO	10.3	9.52	0.79	1	10.26	9.86	0.4	1	0	0	0	0	0	0	carbon-nitrogen ligase activity, with glutamine as amido-N-donor | amidase activity	Amidase signature enzyme | Amidase, fungi type	3.5.1.4	Amidase,	A monocarboxylic acid amide + H(2)O = a monocarboxylate + NH(3),	Tryptophan metabolism	Amino Acid Metabolism	Amidases | Amidases | Amidases	Translation, ribosomal structure and biogenesis
10608	1431877	NO	10.42	9.95	0.47	1	10.42	10.06	0.35	1	0	0	0	0	0	0	transport | protein binding | ATP binding | ATPase activity, coupled to transmembrane movement of substances | integral to membrane	BTB/POZ-like | BTB/POZ fold | BTB/POZ | ABC-2 type transporter | CDR ABC transporter						Pleiotropic drug resistance proteins (PDR1-15), ABC superfamily	Secondary metabolites biosynthesis, transport and catabolism
10607	1400399	NO	10.11	9.68	0.42	1	10.45	10.07	0.38	1	0	0	0	0	0	0	peptide-methionine-(S)-S-oxide reductase activity	Methionine sulphoxide reductase B | Mss4-like						Predicted pilin-like transcription factor	Posttranslational modification, protein turnover, chaperones
10606	1398517	NO	10.38	9.55	0.83	1	10.17	9.89	0.28	1	0	0	5	0	9	0	proteolysis | peptidase activity | glutamate carboxypeptidase II activity	Peptidase M28 | Protease-associated PA | Transferrin receptor-like, dimerisation	3.4.17.21	Glutamate carboxypeptidase II,	Release of an unsubstituted, C-terminal glutamyl residue, typically from Ac-Asp-Glu or folylpoly-gamma-glutamates,			Transferrin receptor and related proteins containing the protease-associated (PA) domain | Transferrin receptor and related proteins containing the protease-associated (PA) domain | Transferrin receptor and related proteins containing the protease-associated (PA) domain	Posttranslational modification, protein turnover, chaperones
10605	1387007	NO	10.33	9.5	0.83	1	10.68	9.99	0.69	1	0	0	0	0	0	0
10604	1386480	NO	10.12	9.71	0.41	1	10.76	9.99	0.76	1	0	0	0	0	0	0	hydrolase activity	NUDIX hydrolase, core | NUDIX						Peroxisomal NUDIX hydrolase	Replication, recombination and repair
10603	1380970	YES	10.45	9.54	0.92	1	10.72	9.92	0.8	1	0	0	0	0	6	0	metabolic process | hydrolase activity, hydrolyzing O-glycosyl compounds | carbohydrate metabolic process	Alkaline phosphatase | Glycoside hydrolase, family 1
10602	1229277	NO	10.48	9.87	0.61	1	10.54	10.09	0.46	1	0	0	0	0	0	0	binding | catalytic activity | metabolic process | oxidoreductase activity | 3-dehydrosphinganine reductase activity	NAD(P)-binding | Glucose/ribitol dehydrogenase | Short-chain dehydrogenase/reductase SDR	1.1.1.102	3-dehydrosphinganine reductase,	Sphinganine + NADP(+) = 3-dehydrosphinganine + NADPH,	Sphingoglycolipid metabolism	Metabolism of Complex Lipids	Predicted dehydrogenase	Secondary metabolites biosynthesis, transport and catabolism
10601	677841	NO	10.62	9.91	0.71	1	10.49	10.39	0.1	1	0	0	0	0	0	0								von Willebrand factor and related coagulation proteins | von Willebrand factor and related coagulation proteins	Extracellular structures
10600	176029	NO	10.46	9.84	0.62	1	10.6	10.5	0.09	1	0	0	0	0	0	0
10599	170081	NO	10.26	10.34	-0.08	1	10.72	10.24	0.49	1	0	0	0	0	0	0								Chitinase	Carbohydrate transport and metabolism
10598	1591988	NO	10.86	10.11	0.75	1	10.31	10.44	-0.13	1	0	0	0	0	0	0								von Willebrand factor and related coagulation proteins | von Willebrand factor and related coagulation proteins	Extracellular structures
10597	1589011	YES	10.57	10.12	0.46	1	10.75	10.36	0.39	1	0	0	0	0	0	0	actin binding	Ribosomal protein L9 N-terminal-like | Actinin-type, actin-binding, conserved site						Cyclin-dependent kinase inhibitor	Signal transduction mechanisms
10596	1585837	NO	10.55	10.22	0.34	1	10.74	10.18	0.56	1	0	0	0	0	0	0		Cystathionine beta-synthase, core						5'-AMP-activated protein kinase, gamma subunit	Energy production and conversion
10595	1584704	NO	10.55	9.96	0.6	1	10.78	10.53	0.25	1	0	0	0	0	0	0		LCCL
10594	1518849	NO	10.63	9.93	0.71	1	10.87	10.16	0.71	1	0	0	0	0	0	0								SWI-SNF chromatin-remodeling complex protein	Chromatin structure and dynamics
10593	1509756	YES	10.26	10.08	0.18	1	10.68	10.38	0.3	1	0	0	0	0	0	0	binding | catalytic activity | metabolic process | NADPH:quinone reductase activity	NAD(P)-binding | Alcohol dehydrogenase, zinc-binding | Alcohol dehydrogenase GroES-like | GroES-like	1.6.5.5	NADPH:quinone reductase,	NADPH + quinone = NADP(+) + semiquinone,			Predicted quinone oxidoreductase | Predicted quinone oxidoreductase	Energy production and conversion
10592	1509731	NO	10.52	9.84	0.67	1	10.43	10.31	0.12	1	0	0	0	0	0	0		Forkhead-associated | SMAD/FHA domain
10591	1508402	NO	10.57	10.09	0.49	1	10.45	10.2	0.25	1	0	0	0	0	0	0		EGF-like region, conserved site
10590	1506048	NO	10.51	10.16	0.35	1	10.42	10.25	0.17	1	0	0	0	0	0	0		Pal1 cell morphology						Splicing coactivator SRm160/300, subunit SRm300	RNA processing and modification
10589	1505183	NO	10.68	10.38	0.3	1	10.69	10.4	0.29	1	0	0	0	0	0	0		Amino acid transporter, transmembrane						Amino acid transporter protein	Amino acid transport and metabolism
10588	1480595	NO	10.55	10.21	0.34	1	10.83	10.41	0.42	1	0	0	0	0	0	0	nucleus | nucleic acid binding | RNA binding | mRNA processing	RNA recognition motif, RNP-1 | U2 snRNP auxilliary factor, large subunit, splicing factor						Splicing factor U2AF, large subunit (RRM superfamily)	RNA processing and modification
10587	1467862	YES	10.6	10.03	0.57	1	10.31	10.31	0	1	0	0	0	0	0	0
10586	1457050	NO	10.36	10.21	0.14	1	10.79	10.25	0.54	1	0	0	0	0	0	0	mRNA metabolic process | ribonucleoprotein complex	Like-Sm ribonucleoprotein, eukaryotic and archaea-type, core | Like-Sm ribonucleoprotein, core | Like-Sm ribonucleoprotein-related, core						Small nuclear ribonucleoprotein (snRNP) LSM3	RNA processing and modification
10585	1455429	NO	10.38	9.8	0.58	1	10.39	10.49	-0.1	1	0	0	0	0	0	0	exo-alpha-sialidase activity		3.2.1.18	Exo-alpha-sialidase,	Hydrolysis of alpha-(2->3)-, alpha-(2->6)-, alpha-(2->8)-glycosidic linkages of terminal sialic residues in oligosaccharides, glycoproteins, glycolipids, colominic acid and synthetic substrates,	N-Glycan degradation	Metabolism of Complex Carbohydrates	Transcription initiation factor TFIID, subunit BDF1 and related bromodomain proteins	Transcription
11143	1457779	YES	9.73	8.78	0.95	1	10.38	9.4	0.98	1	0	0	10	0	12	0	binding | catalytic activity | metabolic process | oxidoreductase activity	WD40 repeat | NAD(P)-binding | Glucose/ribitol dehydrogenase | Short-chain dehydrogenase/reductase SDR						17 beta-hydroxysteroid dehydrogenase type 3, HSD17B3	Lipid transport and metabolism
10583	1453572	NO	10.55	10.31	0.24	1	10.61	10.47	0.14	1	0	0	0	0	0	0	ATP binding | protein kinase activity | protein amino acid phosphorylation | protein-tyrosine kinase activity | protein serine/threonine kinase activity | transmembrane receptor protein serine/threonine kinase activity | 3-phosphoinositide-dependent protein kinase activity | DNA-dependent protein kinase activity | AMP-activated protein kinase activity | casein kinase activity | casein kinase I ac…	Protein kinase ATP binding, conserved site | Protein kinase-like | Protein kinase, core | Serine/threonine protein kinase-related | Tyrosine protein kinase | Serine/threonine protein kinase						Serine/threonine protein kinase	Signal transduction mechanisms
10582	1450462	YES	10.54	10.22	0.32	1	10.72	10.14	0.58	1	0	0	0	0	0	0
10581	1445557	NO	10.36	10.17	0.19	1	10.66	10.44	0.21	1	0	0	0	0	0	0	protein binding | zinc ion binding | nucleus | transcription regulator activity | regulation of transcription | nucleic acid binding | regulation of transcription, DNA-dependent | DNA binding | transcription | transcription elongation regulator activity | regulation of transcription from RNA polymerase II promoter | translation elongation factor activity | RNA polymerase II transcription factor a…	Transcription elongation factor, TFIIS/elongin A/CRSP70, N-terminal | Transcription elongation factor S-II, central region | Zinc finger, TFIIS-type | Transcription elongation factor, IIS | Transcription elongation factor, TFIIS/CRSP70, N-terminal, sub-type | Transcription elongation factor, TFIIS						Transcription elongation factor TFIIS/Cofactor of enhancer-binding protein Sp1	Transcription
10580	1444968	NO	10.54	10.04	0.5	1	10.35	10.4	-0.04	1	0	0	0	0	0	0	protein binding | zinc ion binding	Zinc finger, RING-type						E3 ubiquitin ligase	Posttranslational modification, protein turnover, chaperones
10579	1444547	NO	10.57	10.22	0.35	1	10.59	10.54	0.05	1	0	0	0	0	0	0		Rhodanese-like						M-phase inducer phosphatase	Cell cycle control, cell division, chromosome partitioning
10578	1444351	NO	10.68	10.03	0.65	1	10.75	10.25	0.49	1	0	0	3	0	5	0	oxidoreductase activity	FAD dependent oxidoreductase
10577	1443885	NO	10.61	10.2	0.41	1	10.55	10.36	0.2	1	0	0	0	0	0	0	transferase activity | magnesium ion binding | nucleoside metabolic process | ribose phosphate diphosphokinase activity | nucleotide biosynthetic process | cellular biosynthetic process | ribonucleoside monophosphate biosynthetic process	Phosphoribosyltransferase | Purine/pyrimidine phosphoribosyl transferase, conserved site | Phosphoribosyl pyrophosphokinase | Phosphoribosyl pyrophosphate synthetase, conserved site	2.7.6.1	Ribose-phosphate pyrophosphokinase,	ATP + D-ribose 5-phosphate = AMP + 5-phospho-alpha-D-ribose 1-diphosphate,	Purine metabolism	Nucleotide Metabolism	Ribose-phosphate pyrophosphokinase | Ribose-phosphate pyrophosphokinase	Nucleotide transport and metabolism
10576	1443769	NO	10.43	10.12	0.31	1	10.55	10.6	-0.05	1	0	0	0	0	2	0	binding	Armadillo-type fold | HEAT						Uncharacterized conserved protein	Function unknown
10575	1442700	NO	10.54	9.89	0.65	1	10.8	10.25	0.56	1	0	0	0	0	2	0	metabolic process | oxidoreductase activity | oxidoreductase activity, acting on the aldehyde or oxo group of donors, NAD or NADP as acceptor | succinate-semialdehyde dehydrogenase [NAD(P)+] activity	Aldehyde dehydrogenase | Aldehyde/histidinol dehydrogenase | Aldehyde dehydrogenase, conserved site | Succinic semialdehyde dehydrogenase	1.2.1.16	Succinate-semialdehyde dehydrogenase (NAD(P)+),	Succinate semialdehyde + NAD(P)(+) + H(2)O = succinate + NAD(P)H,	Glutamate metabolism	Amino Acid Metabolism	Aldehyde dehydrogenase	Energy production and conversion
10574	1442093	NO	10.55	10.21	0.33	1	10.49	10.54	-0.05	1	0	0	0	0	0	0		SAC3/GANP/Nin1/mts3/eIF-3 p25						Leucine permease transcriptional regulator	Transcription
10573	1441486	NO	10.65	10.21	0.44	1	10.59	10.5	0.09	1	0	0	0	0	0	0								Serine/threonine protein kinase	Signal transduction mechanisms
10572	1440505	NO	10.7	10.02	0.68	1	10.95	10.19	0.76	1	0	0	0	0	0	0	transport | transporter activity | integral to membrane | response to antibiotic | tetracycline:hydrogen antiporter activity | tetracycline transport	MFS general substrate transporter | Major facilitator superfamily MFS-1 | Major facilitator superfamily | Tetracycline resistance protein, TetB | Drug resistance transporter EmrB/QacA subfamily						Predicted transporter (major facilitator superfamily)	General function prediction only
10571	1439689	NO	10.71	10.21	0.5	1	10.71	10.54	0.17	1	0	0	0	0	0	0	ATP binding | protein kinase activity | protein amino acid phosphorylation | protein-tyrosine kinase activity | protein serine/threonine kinase activity | transmembrane receptor protein serine/threonine kinase activity | 3-phosphoinositide-dependent protein kinase activity | DNA-dependent protein kinase activity | AMP-activated protein kinase activity | casein kinase activity | casein kinase I ac…	Protein kinase ATP binding, conserved site | Protein kinase-like | Protein kinase, core | Serine/threonine protein kinase-related | Tyrosine protein kinase | Serine/threonine protein kinase | Serine/threonine protein kinase, active site | Sterile alpha motif SAM | Sterile alpha motif homology						MEKK and related serine/threonine protein kinases	Signal transduction mechanisms
10570	1426305	NO	10.68	10.16	0.53	1	10.45	10.2	0.24	1	0	0	0	0	0	0		Protein of unknown function DUF300						Predicted seven transmembrane receptor - rhodopsin family	Signal transduction mechanisms
10569	1402076	NO	10.74	9.95	0.79	1	10.83	10.25	0.58	1	0	0	0	0	0	0	binding | catalytic activity | metabolic process | cellular metabolic process | coenzyme binding	NAD(P)-binding | NAD-dependent epimerase/dehydratase						Flavonol reductase/cinnamoyl-CoA reductase	Defense mechanisms
10568	1387326	YES	10.53	10.1	0.43	1	10.55	10.41	0.14	1	0	0	0	0	0	0		Concanavalin A-like lectin/glucanase | Beta-glucan synthesis-associated, SKN1
10567	1379755	NO	10.62	10.04	0.58	1	10.36	10.6	-0.24	1	0	0	0	0	0	0	ATP binding | protein kinase activity | protein amino acid phosphorylation | protein-tyrosine kinase activity | protein serine/threonine kinase activity	Protein kinase ATP binding, conserved site | Protein kinase-like | Protein kinase, core | Serine/threonine protein kinase-related | Tyrosine protein kinase | Serine/threonine protein kinase | Serine/threonine protein kinase, active site						Dual-specificity tyrosine-phosphorylation regulated kinase	General function prediction only
10566	1378979	NO	10.53	10.15	0.38	1	10.87	10.43	0.44	1	0	0	0	0	0	0		WD40 repeat | WD40 repeat-like						WD40 repeat-containing protein	General function prediction only
10565	1368682	NO	10.43	10.18	0.25	1	10.43	10.45	-0.02	1	0	0	0	0	0	0								Putative Zn-finger protein	General function prediction only
10564	135859	NO	10.47	10.14	0.33	1	10.36	10.29	0.07	1	0	0	0	0	0	0	protein binding | ATP binding | protein kinase activity | protein amino acid phosphorylation | protein-tyrosine kinase activity | protein serine/threonine kinase activity | small GTPase regulator activity | protein complex assembly | actin polymerization and/or depolymerization | actin cytoskeleton | transmembrane receptor protein serine/threonine kinase activity | 3-phosphoinositide-dependent pr…	Protein kinase ATP binding, conserved site | Protein kinase-like | Protein kinase, core | Serine/threonine protein kinase-related | PAK-box/P21-Rho-binding | Tyrosine protein kinase | Serine/threonine protein kinase | Serine/threonine protein kinase, active site | Wiscott-Aldrich syndrome, C-terminal						p21-activated serine/threonine protein kinase	Signal transduction mechanisms
10563	997119	NO	11.69	10	1.69	1	11.34	10.7	0.64	1	0	0	0	0	0	0	nucleic acid binding	Polynucleotidyl transferase, Ribonuclease H fold | Argonaute and Dicer protein, PAZ | Stem cell self-renewal protein Piwi | Region of unknown function DUF1785						Translation initiation factor 2C (eIF-2C) and related proteins	Translation, ribosomal structure and biogenesis
10562	891196	NO	11.25	10.32	0.94	1	11.4	10.8	0.6	1	0	0	0	0	0	0
10561	305801	NO	10.91	9.98	0.93	1	11.2	10.8	0.4	1	0	0	0	0	0	0
10560	202270	NO	11.15	10.17	0.98	1	11.25	10.68	0.57	1	0	0	0	0	0	0		PSP1 C-terminal conserved region						Uncharacterized protein PSP1 (suppressor of DNA polymerase alpha mutations in yeast)	General function prediction only
10559	1567672	YES	10.42	9.98	0.44	1	11.63	10.93	0.71	1	0	0	0	0	0	0
10558	1530386	YES	11.12	10.33	0.79	1	11.82	10.61	1.21	1	0	0	0	0	0	0	extracellular region	Allergen V5/Tpx-1 related | SCP-like extracellular						Defense-related protein containing SCP domain	Function unknown
10557	1525170	NO	11.35	9.96	1.39	1	11.81	11.49	0.33	1	0	0	0	0	0	0	chitin synthase activity | chitin biosynthetic process	Chitin synthase | Chitin synthase N-terminal	2.4.1.16	Chitin synthase,	UDP-N-acetyl-D-glucosamine + {(1,4)-(N-acetyl-beta-D-glucosaminyl)}(N) = UDP + {(1,4)-(N-acetyl-beta-D-glucosaminyl)}(N+1),	Aminosugars metabolism	Metabolism of Complex Carbohydrates	Chitin synthase/hyaluronan synthase (glycosyltransferases)	Cell wall/membrane/envelope biogenesis
10556	1512377	YES	10.7	10.42	0.29	1	11.36	10.85	0.52	1	0	0	0	0	0	0	UDP-N-acetylmuramoylalanyl-D-glutamyl-2,6-diaminopimelate-D-alanyl-D-alanine ligase activity | ribosomal S6-glutamic acid ligase activity | coenzyme F420-0 gamma-glutamyl ligase activity | coenzyme F420-2 alpha-glutamyl ligase activity		6.3.2.-	Acid--D-amino-acid ligases (peptide synthases),		Tryptophan metabolism	Amino Acid Metabolism	Serine/threonine protein kinase	Signal transduction mechanisms
10555	1507671	NO	11.33	9.93	1.4	1	11.13	10.69	0.44	1	0	0	0	0	0	0	oxidoreductase activity | FAD binding	Pyridine nucleotide-disulphide oxidoreductase, NAD-binding region						Flavin-containing monooxygenase	Secondary metabolites biosynthesis, transport and catabolism
10554	1504050	YES	11.19	10.4	0.79	1	11.41	10.55	0.86	1	0	0	0	0	0	0	protein binding	WW/Rsp5/WWP						Calcium-responsive transcription coactivator	Transcription
10553	1502804	NO	10.88	10.29	0.59	1	11.38	11.29	0.09	1	0	0	0	0	0	0
10552	1481275	YES	11.11	9.98	1.13	1	11.74	10.45	1.29	1	28	0	22	15	19	28	FAD binding | oxidoreductase activity, acting on CH-OH group of donors | alcohol metabolic process | choline dehydrogenase activity	Glucose-methanol-choline oxidoreductase, N-terminal | Glucose-methanol-choline oxidoreductase, C-terminal | Glucose-methanol-choline oxidoreductase	1.1.99.1	Choline dehydrogenase,	Choline + acceptor = betaine aldehyde + reduced acceptor,	Glycine, serine and threonine metabolism	Amino Acid Metabolism	Glucose dehydrogenase/choline dehydrogenase/mandelonitrile lyase (GMC oxidoreductase family)	General function prediction only
10551	1480390	NO	11.12	10.42	0.71	1	11.16	11.13	0.03	1	0	0	0	0	0	0	proteolysis | pepsin A activity | aspartic-type endopeptidase activity | aspartic-type signal peptidase activity | signal peptide peptidase activity | aspartic endopeptidase activity, intramembrane cleaving	Peptidase A1 | Peptidase aspartic, catalytic	3.4.23.-	Aspartic endopeptidases,				Aspartyl protease	Posttranslational modification, protein turnover, chaperones
10550	1456575	YES	10.65	9.95	0.7	1	11.89	11.06	0.83	1	0	0	0	0	0	0								Glycogen synthase kinase-3	Carbohydrate transport and metabolism
10549	1452464	NO	11.13	10.23	0.9	1	11.72	10.87	0.85	1	0	0	0	0	0	0								Splicing coactivator SRm160/300, subunit SRm300	RNA processing and modification
10548	1448106	NO	11.62	9.76	1.86	1	11.47	10.49	0.97	1	0	0	0	0	0	0	transport | transporter activity | integral to membrane	MFS general substrate transporter | Major facilitator superfamily MFS-1 | Major facilitator superfamily						Synaptic vesicle transporter SVOP and related transporters (major facilitator superfamily)	General function prediction only
10547	1446663	NO	11.41	10.02	1.39	1	11.27	11.35	-0.08	1	0	0	0	0	0	0	transport | membrane | transporter activity | integral to membrane | secondary active sulfate transmembrane transporter activity | sulfate transport	Sulphate transporter | Sulphate transporter/antisigma-factor antagonist STAS | Sulphate anion transporter						Sulfate/bicarbonate/oxalate exchanger SAT-1 and related transporters (SLC26 family)	Inorganic ion transport and metabolism
10546	1446110	NO	11.16	9.52	1.64	1	11.46	11.24	0.22	1	0	0	0	0	0	0
10545	1441426	NO	10.83	10.31	0.52	1	11.33	10.87	0.46	1	0	0	0	0	0	0
10544	1440475	NO	11.11	10.35	0.76	1	11.63	11.05	0.58	1	0	0	0	0	0	0	integral to membrane | sugar:hydrogen symporter activity | carbohydrate transport | nucleotide-sugar transmembrane transporter activity | nucleotide-sugar transport | Golgi membrane	Nucleotide-sugar transporter | UDP-galactose transporter						Predicted UDP-galactose transporter	Carbohydrate transport and metabolism
10543	1436236	NO	10.99	10.37	0.63	1	11.38	10.93	0.45	1	0	0	0	0	0	0	nucleic acid binding	RNA recognition motif, RNP-1						FOG: RRM domain	General function prediction only
10542	1266855	NO	11.16	10.49	0.67	1	11.21	10.76	0.45	1	0	0	0	0	0	0								Nucleolar GTPase/ATPase p130	Nuclear structure
10541	905244	NO	10.78	10.87	-0.08	1	11.15	10.99	0.17	1	0	0	0	0	0	0
10540	785557	NO	10.88	11.04	-0.16	1	11.18	11.06	0.12	1	0	0	0	0	0	0
11468	1265578	NO	9.8	8.51	1.29	1	10.05	9.08	0.97	1	0	0	0	0	0	0	binding | catalytic activity | metabolic process | phosphopantetheine binding | cofactor binding	Acyl transferase | Acyl transferase/acyl hydrolase/lysophospholipase | Malonyl-CoA ACP transacylase, ACP-binding | Phosphopantetheine attachment site | Beta-ketoacyl synthase, N-terminal | Phosphopantetheine-binding | Beta-ketoacyl synthase, C-terminal | Acyl carrier protein-like | Thiolase-like						Animal-type fatty acid synthase and related proteins	Lipid transport and metabolism
10538	30634	NO	10.76	10.89	-0.13	1	11.22	10.94	0.28	1	0	0	0	0	11	0	metabolic process | nucleotidyltransferase activity | UDP-N-acetylglucosamine diphosphorylase activity	UTP--glucose-1-phosphate uridylyltransferase	2.7.7.23	UDP-N-acetylglucosamine pyrophosphorylase,	UTP + N-acetyl-alpha-D-glucosamine 1-phosphate = diphosphate + UDP-N-acetyl-D-glucosamine,	Aminosugars metabolism	Metabolism of Complex Carbohydrates	UDP-N-acetylglucosamine pyrophosphorylase	Cell wall/membrane/envelope biogenesis
[truncated: 10,537 more rows]
